# Supplementary material for: Chromatin topology defines estradiol-primed progesterone receptor and PAX2 binding in endometrial cancer cells
Source: eLife journal article supplement (doi:10.7554/elife.66034), 2022-01-12
Supplement: supp [file elife-66034-supp-v1.zip]

A

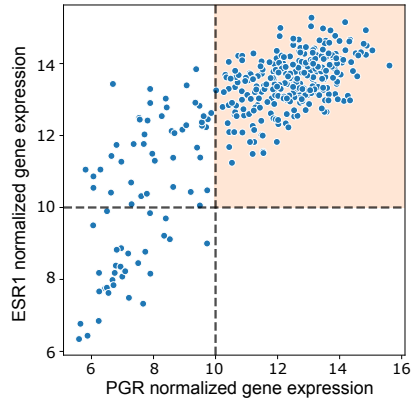

B

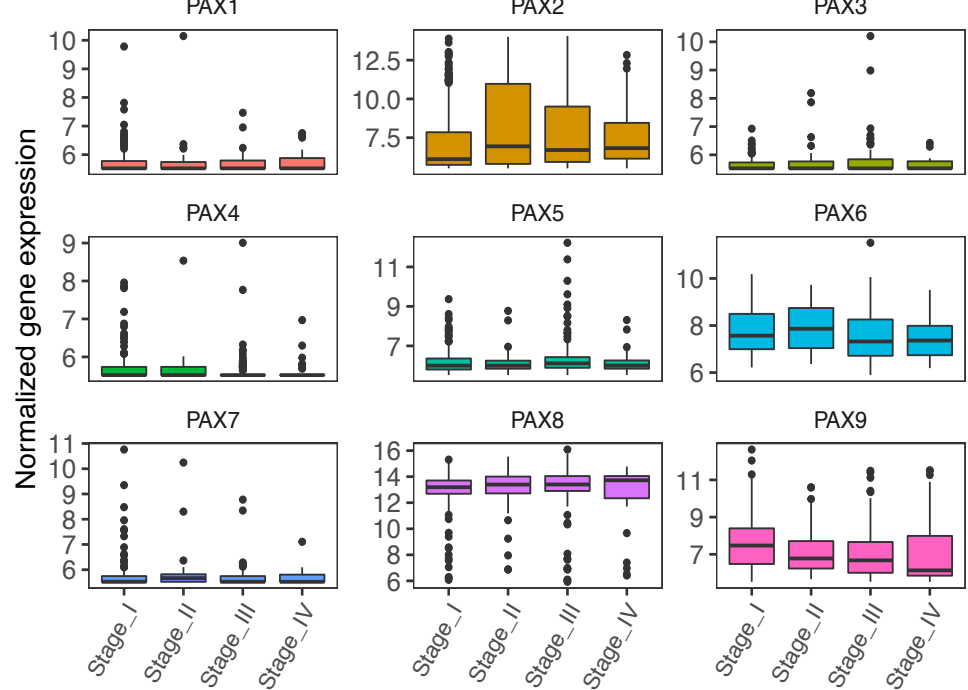

C

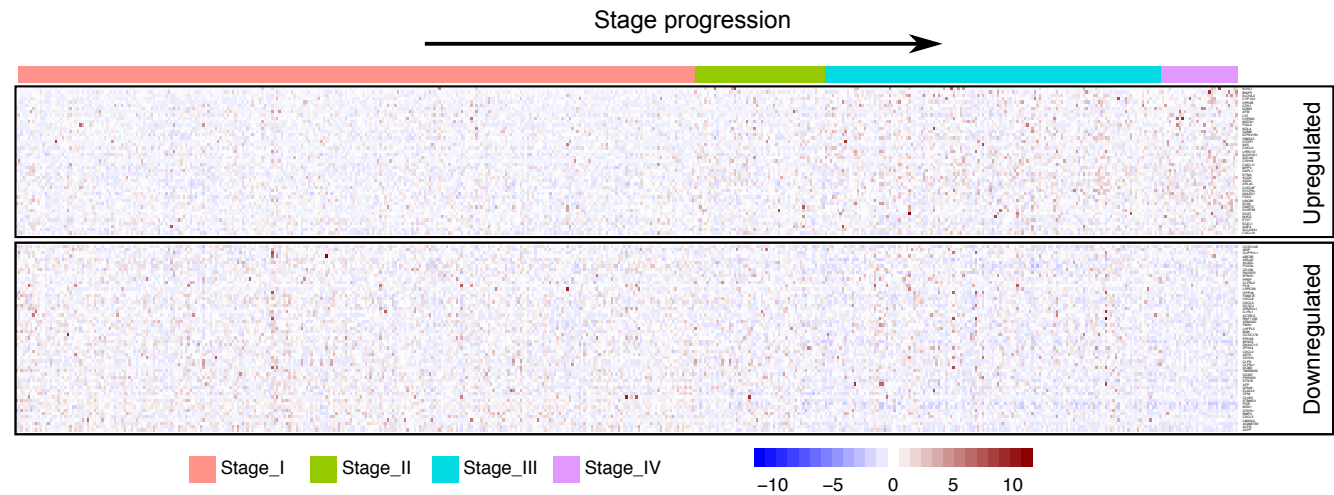

D

Upregulated

KLHL1 BNIP5 ELOVL2 CYP1A2 UPK3B  
CPS1 GZMH AFM LYZ CHRNG MEOX1  
FIGLA NOL4 GZMB ATP6V1B1 HMG2  
OTOP1 AK5 CXCL9 LRRC19 ALDH1A1  
SSC4D CDH18 CXCL11 MPP3 DAPL1  
DTNA SCG5 ADD2 ARL4C CLEC4F  
SYCP2L NHLRC1 FGD2 UNC80 SCIN  
DMRT2 DUSP26 SOST MYOC ETV7  
ECEL1 AQP4 SLCO3A1 CXCL10

Downregulated

ALPP ALPG ADAMTS8 LMAN1L CXCL5  
BMP4 DTHD1 MSX1 PGR STMND1  
CLVS2 CPM ELAVL2 GRIA2 AFP  
STX18 PRSS56 CD207 TMEM232 GCM2  
CLPSL1 CLPS CDH10 ART3 CXCL2  
ZFHX4 DNAJC10 NPAS3 EPHA3  
CCDC178 MAK LHFPL5 FMN1 SEMA3D  
RNF113B ACTBL2 IL1RL1 SPARCL1  
DCDC1 CXCL3 CXCL8 FAM47E GPR18  
LRRC38 PI16 CLPSL2 PPBP NTNG1  
RASSF6 CD109 PODXL ACADL ARL4D  
ABCB5 GLIPR1L1 IBSP CCDC146
