# Supplementary material for: Chromatin topology defines estradiol-primed progesterone receptor and PAX2 binding in endometrial cancer cells
Source: eLife journal article supplement (doi:10.7554/elife.66034), 2022-01-12
Supplement: supp [file elife-66034-supp-v1.zip]

Archive with 21 entries (21 files):
- elife_poa_e66034_Transparent_Reporting_File.docx
- elife_poa_e66034_Figure_1_figure_supplement_1.pdf
- elife_poa_e66034_Figure_1_figure_supplement_2.pdf
- elife_poa_e66034_Figure_1_figure_supplement_3.pdf
- elife_poa_e66034_Figure_2_figure_supplement_1.pdf
- elife_poa_e66034_Figure_2_figure_supplement_2.pdf
- elife_poa_e66034_Figure_4_figure_supplement_1.pdf
- elife_poa_e66034_Figure_5_figure_supplement_1.pdf
- elife_poa_e66034_Figure_5_figure_supplement_2.pdf
- elife_poa_e66034_Figure_6_figure_supplement_1.pdf
- elife_poa_e66034_Figure_7_figure_supplement_1.pdf
- elife_poa_e66034_Figure_1_source_data_1.csv
- elife_poa_e66034_Figure_1_source_data_2.csv
- elife_poa_e66034_Figure_1_source_data_3.txt
- elife_poa_e66034_Figure_1_source_data_4.csv
- elife_poa_e66034_Figure_5_source_data_1.csv
- elife_poa_e66034_Figure_5_source_data_2.csv
- elife_poa_e66034_Figure_6_source_data_1.txt
- elife_poa_e66034_Figure_6_source_data_2.txt
- elife_poa_e66034_Figure_7_source_data_1.txt
- elife_poa_e66034_Figure_7_source_data_2.txt
