# Supplementary material for: Chromatin topology defines estradiol-primed progesterone receptor and PAX2 binding in endometrial cancer cells
Source: eLife journal article supplement (doi:10.7554/elife.66034), 2022-01-12

**A**

TF binding motifs enriched in PRbs:  
Ishikawa vs. T47D

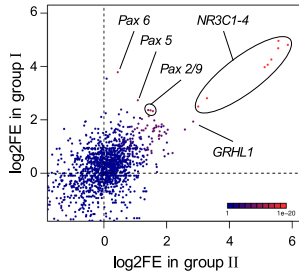**B**

TF binding motifs enriched in ERbs:  
Ishikawa vs. T47D

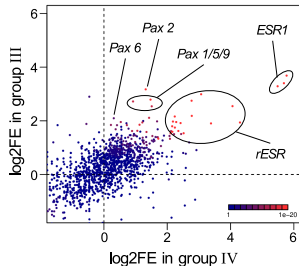**C**

TF binding motifs enriched in PRbs:  
Ishikawa vs. T47D

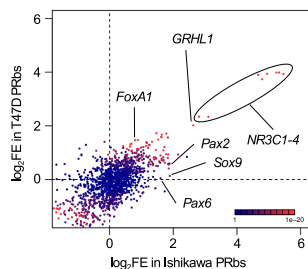**D**

TF binding motifs enriched in  
Ishikawa cells

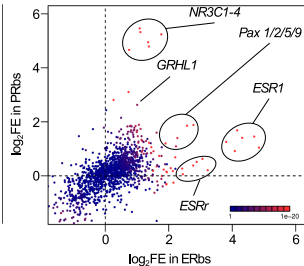**E**

TF binding motifs enriched in T47D cells

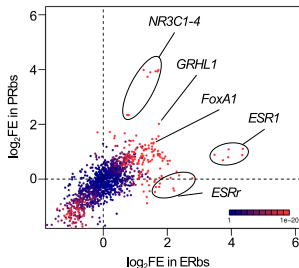**F**

TF binding motif enriched in  
Ishikawa cells

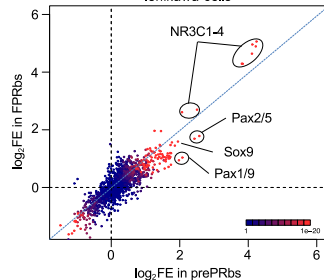

Supplement: supp [file elife-66034-supp-v1.zip]
