# Supplementary material for: Chromatin topology defines estradiol-primed progesterone receptor and PAX2 binding in endometrial cancer cells
Source: eLife journal article supplement (doi:10.7554/elife.66034), 2022-01-12
Supplement: supp [file elife-66034-supp-v1.zip › elife_poa_e66034_Figure_1_source_data_2.csv]

PR	treatment	pretreatment
14.205	R5020	preE2
23.148	R5020	preE2
21.419	R5020	preE2
14.483	R5020	preE2
24.001	R5020	preE2
21.107	R5020	preE2
22.207	R5020	preE2
9.077	R5020	preE2
25.703	R5020	preE2
26.829	R5020	preE2
16.386	R5020	preE2
31.614	R5020	preE2
26.563	R5020	preE2
27.997	R5020	preE2
19.718	R5020	preE2
40.214	R5020	preE2
38.465	R5020	preE2
34.429	R5020	preE2
22.578	R5020	preE2
28.837	R5020	preE2
39.458	R5020	preE2
33.971	R5020	preE2
29.770	R5020	preE2
41.299	R5020	preE2
25.039	R5020	preE2
34.257	R5020	preE2
41.232	R5020	preE2
69.391	R5020	preE2
80.177	R5020	preE2
33.264	R5020	preE2
89.995	R5020	preE2
73.946	R5020	preE2
29.804	R5020	preE2
23.468	R5020	preE2
34.537	R5020	preE2
23.904	R5020	preE2
84.471	R5020	preE2
31.635	R5020	preE2
53.002	R5020	preE2
29.555	R5020	preE2
70.820	R5020	preE2
21.620	R5020	preE2
47.558	R5020	preE2
27.553	R5020	preE2
27.706	R5020	preE2
18.996	R5020	preE2
42.800	R5020	preE2
24.862	R5020	preE2
25.111	R5020	preE2
25.605	R5020	preE2
12.065	R5020	preE2
21.704	R5020	preE2
16.707	R5020	preE2
22.905	R5020	preE2
22.371	R5020	preE2
16.858	R5020	preE2
17.160	R5020	preE2
12.001	R5020	preE2
29.077	R5020	preE2
29.308	R5020	preE2
24.864	R5020	preE2
21.911	R5020	preE2
35.097	R5020	preE2
42.190	R5020	preE2
35.801	R5020	preE2
30.630	R5020	preE2
47.684	R5020	preE2
34.990	R5020	preE2
52.348	R5020	preE2
39.358	R5020	preE2
35.201	R5020	preE2
39.673	R5020	preE2
33.876	R5020	preE2
56.971	R5020	preE2
35.496	R5020	preE2
15.048	R5020	preE2
38.492	R5020	preE2
38.585	R5020	preE2
18.324	R5020	preE2
9.798	R5020	preE2
14.457	R5020	preE2
21.461	R5020	preE2
20.661	R5020	preE2
24.677	R5020	preE2
15.623	R5020	preE2
22.989	R5020	preE2
38.948	R5020	preE2
32.197	R5020	preE2
20.976	R5020	preE2
19.908	R5020	preE2
16.292	R5020	preE2
25.686	R5020	preE2
42.188	R5020	preE2
40.286	R5020	preE2
41.342	R5020	preE2
31.063	R5020	preE2
31.067	R5020	preE2
32.688	R5020	preE2
37.197	R5020	preE2
32.036	R5020	preE2
38.130	R5020	preE2
33.218	R5020	preE2
20.064	R5020	preE2
34.207	R5020	preE2
18.176	R5020	preE2
8.450	R5020	preE2
8.950	R5020	preE2
16.663	R5020	preE2
21.449	R5020	preE2
18.605	R5020	preE2
22.083	R5020	preE2
30.313	R5020	preE2
30.340	R5020	preE2
19.450	R5020	preE2
37.185	R5020	preE2
24.804	R5020	preE2
24.767	R5020	preE2
22.038	R5020	preE2
37.353	R5020	preE2
34.260	R5020	preE2
37.004	R5020	preE2
30.517	R5020	preE2
22.283	R5020	preE2
34.437	R5020	preE2
36.170	R5020	preE2
25.250	R5020	preE2
31.120	R5020	preE2
27.998	R5020	preE2
25.388	R5020	preE2
33.017	R5020	preE2
26.420	R5020	preE2
27.990	R5020	preE2
25.688	R5020	preE2
18.726	R5020	preE2
12.780	R5020	preE2
21.181	R5020	preE2
23.329	R5020	preE2
21.655	R5020	preE2
39.164	R5020	preE2
21.599	R5020	preE2
18.201	R5020	preE2
44.894	R5020	preE2
25.383	R5020	preE2
37.853	R5020	preE2
45.397	R5020	preE2
43.912	R5020	preE2
46.610	R5020	preE2
39.267	R5020	preE2
31.056	R5020	preE2
37.648	R5020	preE2
41.552	R5020	preE2
35.300	R5020	preE2
43.936	R5020	preE2
46.950	R5020	preE2
26.452	R5020	preE2
37.414	R5020	preE2
45.704	R5020	preE2
43.362	R5020	preE2
37.659	R5020	preE2
37.377	R5020	preE2
39.486	R5020	preE2
23.510	R5020	preE2
22.903	R5020	preE2
28.610	R5020	preE2
19.915	R5020	preE2
4.578	T0	preE2
1.940	T0	preE2
8.951	T0	preE2
10.025	T0	preE2
4.901	T0	preE2
35.718	T0	preE2
4.420	T0	preE2
3.274	T0	preE2
3.695	T0	preE2
7.109	T0	preE2
16.515	T0	preE2
33.085	T0	preE2
39.445	T0	preE2
8.979	T0	preE2
11.567	T0	preE2
22.969	T0	preE2
9.853	T0	preE2
3.282	T0	preE2
7.559	T0	preE2
10.198	T0	preE2
7.028	T0	preE2
32.111	T0	preE2
28.418	T0	preE2
47.368	T0	preE2
7.586	T0	preE2
12.581	T0	preE2
14.284	T0	preE2
5.533	T0	preE2
7.113	T0	preE2
42.502	T0	preE2
8.538	T0	preE2
27.566	T0	preE2
10.377	T0	preE2
10.676	T0	preE2
7.999	T0	preE2
15.614	T0	preE2
5.561	T0	preE2
19.158	T0	preE2
22.110	T0	preE2
16.822	T0	preE2
49.838	T0	preE2
9.260	T0	preE2
8.042	T0	preE2
7.661	T0	preE2
39.637	T0	preE2
6.195	T0	preE2
8.620	T0	preE2
33.858	T0	preE2
5.165	T0	preE2
30.625	T0	preE2
7.076	T0	preE2
24.241	T0	preE2
11.442	T0	preE2
13.660	T0	preE2
7.071	T0	preE2
6.429	T0	preE2
36.936	T0	preE2
6.647	T0	preE2
8.213	T0	preE2
4.250	T0	preE2
7.407	T0	preE2
6.735	T0	preE2
40.262	T0	preE2
13.878	T0	preE2
6.073	T0	preE2
5.394	T0	preE2
10.238	T0	preE2
11.545	T0	preE2
10.936	T0	preE2
7.865	T0	preE2
8.504	T0	preE2
6.172	T0	preE2
7.085	T0	preE2
4.647	T0	preE2
18.388	T0	preE2
25.455	T0	preE2
17.360	T0	preE2
22.811	T0	preE2
17.495	T0	preE2
36.391	T0	preE2
27.850	T0	preE2
34.987	T0	preE2
28.786	T0	preE2
23.234	T0	preE2
20.287	T0	preE2
48.657	T0	preE2
41.611	T0	preE2
35.654	T0	preE2
16.529	T0	preE2
57.194	T0	preE2
56.273	T0	preE2
40.213	T0	preE2
36.203	T0	preE2
49.520	T0	preE2
59.111	T0	preE2
71.995	T0	preE2
53.852	T0	preE2
52.515	T0	preE2
41.678	T0	preE2
62.490	T0	preE2
47.215	T0	preE2
49.693	T0	preE2
39.845	T0	preE2
50.267	T0	preE2
51.144	T0	preE2
50.365	T0	preE2
56.072	T0	preE2
26.308	T0	preE2
20.910	T0	preE2
27.405	T0	preE2
19.380	T0	preE2
9.586	T0	preE2
12.269	T0	preE2
26.613	T0	preE2
11.281	T0	preE2
44.853	T0	preE2
30.742	T0	preE2
20.856	T0	preE2
14.504	T0	preE2
45.292	T0	preE2
36.519	T0	preE2
19.763	T0	preE2
33.286	T0	preE2
34.601	T0	preE2
27.345	T0	preE2
37.465	T0	preE2
35.875	T0	preE2
94.964	T0	preE2
9.806	T0	preE2
93.318	T0	preE2
9.105	T0	preE2
7.739	T0	preE2
24.032	T0	preE2
46.150	T0	preE2
32.691	T0	preE2
15.069	T0	preE2
40.180	T0	preE2
8.802	T0	preE2
7.834	T0	preE2
70.739	T0	preE2
11.661	T0	preE2
12.941	T0	preE2
13.517	T0	preE2
70.273	T0	preE2
6.787	T0	preE2
17.277	T0	preE2
13.078	T0	preE2
58.561	T0	preE2
8.585	T0	preE2
84.292	T0	preE2
101.443	T0	preE2
6.537	T0	preE2
44.899	T0	preE2
102.030	T0	preE2
5.643	T0	preE2
14.114	T0	preE2
10.063	T0	preE2
8.262	T0	preE2
3.531	T0	preE2
4.993	T0	preE2
9.038	T0	preE2
2.885	T0	preE2
5.691	T0	preE2
6.301	T0	preE2
48.670	T0	preE2
47.934	T0	preE2
30.226	T0	preE2
13.423	T0	preE2
16.651	T0	preE2
39.513	T0	preE2
27.826	T0	preE2
9.887	T0	preE2
38.028	T0	preE2
7.064	T0	preE2
17.221	T0	preE2
20.356	T0	preE2
15.517	T0	preE2
25.099	T0	preE2
27.231	T0	preE2
16.550	T0	preE2
37.874	T0	preE2
8.654	T0	preE2
16.529	T0	preE2
35.169	T0	preE2
25.199	T0	preE2
29.597	T0	preE2
62.415	T0	preE2
31.562	T0	preE2
42.629	T0	preE2
5.668	T0	preE2
95.544	T0	preE2
9.596	T0	preE2
26.465	T0	preE2
8.070	T0	preE2
8.864	T0	preE2
11.627	T0	preE2
9.565	T0	preE2
13.039	T0	preE2
26.026	T0	preE2
17.552	T0	preE2
12.687	T0	preE2
16.062	T0	preE2
22.914	T0	preE2
13.267	T0	preE2
30.483	T0	preE2
21.372	T0	preE2
26.619	T0	preE2
43.004	T0	preE2
35.991	T0	preE2
26.604	T0	preE2
40.569	T0	preE2
41.060	T0	preE2
21.323	T0	preE2
42.989	T0	preE2
14.785	T0	preE2
30.313	T0	preE2
41.201	T0	preE2
24.736	T0	preE2
22.755	T0	preE2
37.847	T0	preE2
23.362	T0	preE2
12.954	T0	preE2
14.377	T0	preE2
48.986	T0	preE2
22.915	T0	preE2
21.753	T0	preE2
65.192	R5020	no preE2
61.681	R5020	no preE2
34.372	R5020	no preE2
34.498	R5020	no preE2
72.299	R5020	no preE2
40.521	R5020	no preE2
74.860	R5020	no preE2
31.637	R5020	no preE2
33.431	R5020	no preE2
37.340	R5020	no preE2
31.358	R5020	no preE2
27.591	R5020	no preE2
70.952	R5020	no preE2
51.468	R5020	no preE2
29.906	R5020	no preE2
28.099	R5020	no preE2
45.168	R5020	no preE2
43.127	R5020	no preE2
25.102	R5020	no preE2
29.364	R5020	no preE2
50.177	R5020	no preE2
34.913	R5020	no preE2
38.361	R5020	no preE2
25.213	R5020	no preE2
34.976	R5020	no preE2
36.687	R5020	no preE2
23.417	R5020	no preE2
21.712	R5020	no preE2
21.306	R5020	no preE2
29.015	R5020	no preE2
27.133	R5020	no preE2
36.718	R5020	no preE2
38.584	R5020	no preE2
19.916	R5020	no preE2
31.068	R5020	no preE2
26.806	R5020	no preE2
61.207	R5020	no preE2
45.100	R5020	no preE2
53.269	R5020	no preE2
29.274	R5020	no preE2
48.810	R5020	no preE2
47.667	R5020	no preE2
62.050	R5020	no preE2
51.490	R5020	no preE2
32.347	R5020	no preE2
58.963	R5020	no preE2
47.026	R5020	no preE2
16.510	R5020	no preE2
45.184	R5020	no preE2
35.441	R5020	no preE2
19.889	R5020	no preE2
39.624	R5020	no preE2
16.967	R5020	no preE2
18.553	R5020	no preE2
21.682	R5020	no preE2
15.080	R5020	no preE2
20.651	R5020	no preE2
17.368	R5020	no preE2
16.242	R5020	no preE2
17.298	R5020	no preE2
17.867	R5020	no preE2
14.365	R5020	no preE2
12.135	R5020	no preE2
17.425	R5020	no preE2
13.966	R5020	no preE2
16.884	R5020	no preE2
24.456	R5020	no preE2
28.514	R5020	no preE2
34.794	R5020	no preE2
12.000	R5020	no preE2
12.071	R5020	no preE2
31.595	R5020	no preE2
30.867	R5020	no preE2
19.364	R5020	no preE2
12.173	R5020	no preE2
15.466	R5020	no preE2
37.977	R5020	no preE2
20.213	R5020	no preE2
43.574	R5020	no preE2
38.448	R5020	no preE2
26.425	R5020	no preE2
19.234	R5020	no preE2
22.227	R5020	no preE2
37.462	R5020	no preE2
17.017	R5020	no preE2
22.449	R5020	no preE2
9.817	T0	no preE2
9.280	T0	no preE2
14.743	T0	no preE2
23.753	T0	no preE2
5.288	T0	no preE2
9.377	T0	no preE2
8.004	T0	no preE2
7.636	T0	no preE2
9.768	T0	no preE2
7.742	T0	no preE2
3.121	T0	no preE2
6.885	T0	no preE2
48.172	T0	no preE2
4.985	T0	no preE2
11.080	T0	no preE2
22.487	T0	no preE2
44.262	T0	no preE2
22.815	T0	no preE2
6.927	T0	no preE2
8.142	T0	no preE2
4.459	T0	no preE2
29.380	T0	no preE2
5.633	T0	no preE2
9.789	T0	no preE2
21.497	T0	no preE2
27.468	T0	no preE2
6.940	T0	no preE2
21.648	T0	no preE2
30.814	T0	no preE2
5.687	T0	no preE2
4.735	T0	no preE2
14.250	T0	no preE2
9.419	T0	no preE2
5.649	T0	no preE2
10.905	T0	no preE2
8.310	T0	no preE2
6.420	T0	no preE2
22.321	T0	no preE2
26.166	T0	no preE2
8.091	T0	no preE2
13.524	T0	no preE2
45.312	T0	no preE2
8.664	T0	no preE2
8.027	T0	no preE2
8.261	T0	no preE2
17.878	T0	no preE2
7.225	T0	no preE2
29.769	T0	no preE2
4.404	T0	no preE2
5.598	T0	no preE2
9.814	T0	no preE2
10.892	T0	no preE2
7.768	T0	no preE2
10.178	T0	no preE2
27.545	T0	no preE2
5.538	T0	no preE2
5.438	T0	no preE2
14.650	T0	no preE2
10.562	T0	no preE2
5.322	T0	no preE2
7.791	T0	no preE2
41.864	T0	no preE2
6.835	T0	no preE2
4.527	T0	no preE2
7.752	T0	no preE2
6.198	T0	no preE2
7.262	T0	no preE2
6.185	T0	no preE2
14.929	T0	no preE2
2.618	T0	no preE2
4.455	T0	no preE2
6.811	T0	no preE2
6.546	T0	no preE2
7.421	T0	no preE2
7.190	T0	no preE2
4.180	T0	no preE2
4.759	T0	no preE2
6.311	T0	no preE2
0.395	T0	no preE2
1.074	T0	no preE2
2.217	T0	no preE2
3.644	T0	no preE2
5.139	T0	no preE2
6.331	T0	no preE2
4.224	T0	no preE2
0.442	T0	no preE2
5.051	T0	no preE2
4.975	T0	no preE2
2.797	T0	no preE2
8.174	T0	no preE2
0.894	T0	no preE2
5.392	T0	no preE2
0.720	T0	no preE2
7.020	T0	no preE2
4.804	T0	no preE2
4.378	T0	no preE2
5.354	T0	no preE2
1.054	T0	no preE2
0.619	T0	no preE2
5.190	T0	no preE2
5.043	T0	no preE2
2.750	T0	no preE2
27.810	T0	no preE2
6.468	T0	no preE2
3.203	T0	no preE2
0.958	T0	no preE2
4.545	T0	no preE2
6.184	T0	no preE2
7.127	T0	no preE2
0.651	T0	no preE2
11.940	T0	no preE2
28.177	T0	no preE2
0.864	T0	no preE2
53.358	T0	no preE2
13.655	T0	no preE2
9.689	T0	no preE2
44.400	T0	no preE2
2.884	T0	no preE2
3.119	T0	no preE2
1.606	T0	no preE2
5.611	T0	no preE2
3.514	T0	no preE2
1.399	T0	no preE2
3.308	T0	no preE2
5.488	T0	no preE2
4.840	T0	no preE2
6.088	T0	no preE2
4.227	T0	no preE2
4.946	T0	no preE2
0.861	T0	no preE2
6.129	T0	no preE2
2.586	T0	no preE2
3.874	T0	no preE2
5.054	T0	no preE2
11.689	T0	no preE2
4.046	T0	no preE2
4.621	T0	no preE2
2.758	T0	no preE2
7.163	T0	no preE2
11.317	T0	no preE2
9.067	T0	no preE2
0.433	T0	no preE2
9.539	T0	no preE2
3.136	T0	no preE2
11.164	T0	no preE2
9.577	T0	no preE2
9.785	T0	no preE2
21.741	T0	no preE2
6.693	T0	no preE2
3.847	T0	no preE2
1.520	T0	no preE2
6.517	T0	no preE2
73.746	T0	no preE2
83.661	T0	no preE2
7.971	T0	no preE2
3.617	T0	no preE2
63.006	T0	no preE2
9.459	T0	no preE2
71.443	T0	no preE2
67.753	T0	no preE2
4.651	T0	no preE2
9.694	T0	no preE2
54.542	T0	no preE2
9.741	T0	no preE2
62.706	T0	no preE2
11.826	T0	no preE2
54.519	T0	no preE2
12.247	T0	no preE2
7.419	T0	no preE2
8.983	T0	no preE2
10.297	T0	no preE2
10.187	T0	no preE2
6.668	T0	no preE2
9.914	T0	no preE2
10.915	T0	no preE2
5.363	T0	no preE2
10.378	T0	no preE2
11.529	T0	no preE2
12.366	T0	no preE2
5.368	T0	no preE2
5.623	T0	no preE2
7.077	T0	no preE2
7.412	T0	no preE2
14.147	T0	no preE2
2.667	T0	no preE2
6.648	T0	no preE2
6.783	T0	no preE2
8.120	T0	no preE2
2.467	T0	no preE2
6.082	T0	no preE2
1.827	T0	no preE2
3.274	T0	no preE2
3.013	T0	no preE2
8.487	T0	no preE2
13.029	T0	no preE2
2.192	T0	no preE2
4.310	T0	no preE2
5.365	T0	no preE2
15.106	T0	no preE2
4.198	T0	no preE2
6.145	T0	no preE2
12.302	T0	no preE2
9.513	T0	no preE2
5.441	T0	no preE2
17.169	T0	no preE2
5.613	T0	no preE2
64.465	T0	no preE2
11.703	T0	no preE2
30.058	T0	no preE2
3.836	T0	no preE2
22.453	T0	no preE2
64.260	T0	no preE2
58.899	T0	no preE2
43.688	T0	no preE2
39.284	T0	no preE2
25.274	T0	no preE2
47.985	T0	no preE2
46.199	T0	no preE2
28.410	T0	no preE2
12.618	T0	no preE2
26.616	T0	no preE2
6.475	T0	no preE2
43.648	T0	no preE2
33.115	T0	no preE2
28.964	T0	no preE2
14.311	T0	no preE2
13.191	T0	no preE2
10.571	T0	no preE2
11.807	T0	no preE2
9.225	T0	no preE2
12.583	T0	no preE2
10.124	T0	no preE2
18.419	T0	no preE2
26.215	T0	no preE2
3.600	T0	no preE2
10.996	T0	no preE2
10.653	T0	no preE2
5.808	T0	no preE2
8.271	T0	no preE2
6.902	T0	no preE2
3.230	T0	no preE2
9.849	T0	no preE2
1.964	T0	no preE2
7.064	T0	no preE2
6.998	T0	no preE2
7.317	T0	no preE2
6.626	T0	no preE2
3.622	T0	no preE2
5.502	T0	no preE2
5.162	T0	no preE2
