# Supplementary material for: Chromatin topology defines estradiol-primed progesterone receptor and PAX2 binding in endometrial cancer cells
Source: eLife journal article supplement (doi:10.7554/elife.66034), 2022-01-12
Supplement: supp [file elife-66034-supp-v1.zip › elife_poa_e66034_Figure_1_source_data_3.txt]

NAME	DESCRIPTION	T0_1	T0_2	R_1	R_2	E_1	E_2
ENSG00000000003.15_TSPAN6	NA	13.9194976614591	13.6431516365515	15.1311629449468	13.6281658984572	14.5523510436242	13.611149104467
ENSG00000000005.6_TNMD	NA	1.23773309057468	-1	2.25080803793905	-1	0.489356241498477	-1
ENSG00000000419.12_DPM1	NA	12.1938998233354	11.9849736935293	13.0235368985118	11.9400023556672	12.5061773259228	12.0445399061725
ENSG00000000457.14_SCYL3	NA	10.7001429783792	10.885701857383	11.0711567594517	10.8410848350984	10.8622203965478	10.7205093486853
ENSG00000000460.17_C1orf112	NA	11.6702085229284	11.1771170527619	12.0666980047091	11.1549500430395	11.8759706892203	11.1858921656737
ENSG00000000938.13_FGR	NA	0.515145658870156	0.756704934741344	0.646045912731413	-1	1.68322706982405	1.7051978671648
ENSG00000000971.15_CFH	NA	8.07157500708253	8.53322867485991	7.62572032815036	8.30768258219465	8.16949527155888	8.48942952469073
ENSG00000001036.14_FUCA2	NA	13.9990176877382	14.0207005649033	13.9367078895901	14.1327943941081	14.0015126386966	14.0090148785263
ENSG00000001084.13_GCLC	NA	12.611757123834	12.5552658737417	11.9154296575768	12.6466266297782	12.1506060593813	12.7799278133486
ENSG00000001167.14_NFYA	NA	13.4009595155864	13.1157440582121	13.038587152905	13.1838298042786	13.1895722824638	13.5562178465654
ENSG00000001460.18_STPG1	NA	11.144582535983	11.8552574343285	11.3028557221595	11.7977558343219	11.3656366021798	11.7000874535797
ENSG00000001461.17_NIPAL3	NA	12.5696001624252	12.1082651693036	12.1891974739169	11.9840009544368	12.2460338249992	12.3823117248241
ENSG00000001497.16_LAS1L	NA	12.4484435370045	12.263978839739	11.9359639491093	12.3303003830397	12.287573630507	12.4324099686371
ENSG00000001561.7_ENPP4	NA	12.7346525399015	13.2779698157803	13.3258688412197	13.3307756576723	12.9963000544336	13.232071116046
ENSG00000001617.12_SEMA3F	NA	12.4575283404318	11.4181912547977	12.1964167567631	11.3734207330479	12.4638728797725	11.8869578936762
ENSG00000001626.15_CFTR	NA	6.5018599015896	7.05037778848882	6.14530332484776	7.31437566923099	5.26530072365377	5.70137572995866
ENSG00000001629.10_ANKIB1	NA	12.6443663924578	13.3183505745413	12.2784884410746	13.3573804141877	12.4088262235337	13.1714835065157
ENSG00000001630.17_CYP51A1	NA	14.8859539232262	15.1889598000565	14.5954679417787	15.2294497579155	14.7160907550069	15.6917800553652
ENSG00000001631.15_KRIT1	NA	12.1193350249981	12.2888867904157	12.0695601625009	12.3346569138834	11.9624831970442	12.309901041203
ENSG00000002016.18_RAD52	NA	11.1894693107926	9.63079803328165	11.2665242614326	9.25000588143039	11.3050855981419	10.9974372688551
ENSG00000002079.14_MYH16	NA	3.29151283071405	2.68888213318037	2.78434487607049	4.2475209474086	2.95057042569612	3.7423767631696
ENSG00000002330.13_BAD	NA	12.8724146081636	12.4707125555249	13.2103476045119	12.4996643223351	13.1752652153396	12.3927184235783
ENSG00000002549.12_LAP3	NA	13.136028733668	12.8639353180623	12.8835676268558	13.0084901901667	12.9913445611854	12.876483567429
ENSG00000002586.20_CD99	NA	11.441119365515	10.7666234585218	11.5977180764418	10.699634365301	11.4718261698775	10.7986135934148
ENSG00000002586.20_PAR_Y_CD99	NA	11.441119365515	10.7666234585218	11.5977180764418	10.699634365301	11.4718261698775	10.7986135934148
ENSG00000002587.10_HS3ST1	NA	8.80547168899131	8.65743853703956	8.96556961745894	8.56663841764934	9.03290202347321	8.65995229463267
ENSG00000002726.20_AOC1	NA	8.47342520819913	7.44448126926549	8.27788318255774	7.53485894637434	8.46716927295273	7.97571628638594
ENSG00000002745.13_WNT16	NA	3.29151283071405	3.14198696342875	2.99170115686585	3.05088813838361	2.77119432927765	2.79529286833288
ENSG00000002746.15_HECW1	NA	4.72878449711598	5.62277558533674	4.04204020973965	5.61971002982966	2.95057042569612	3.92826874483634
ENSG00000002822.15_MAD1L1	NA	11.5235671127167	11.1726629585435	10.3615255991815	11.3029126627006	11.1094598054689	11.1122377743736
ENSG00000002834.18_LASP1	NA	14.6161079358953	14.360374446869	13.898285294495	14.3245938156867	14.1083622333977	14.4274397492092
ENSG00000002919.14_SNX11	NA	12.0114586033785	12.0989056481852	11.9363559890527	12.1734568363202	11.9800196198562	12.1479141967863
ENSG00000002933.9_TMEM176A	NA	3.9416899172362	2.68888213318037	4.37382872199675	2.42411916774553	3.50408896330302	3.13458395655897
ENSG00000003056.8_M6PR	NA	15.3542465703993	15.1609845412582	15.4495552002563	15.246167778816	15.3675101217077	15.2327736272121
ENSG00000003096.14_KLHL13	NA	12.8708048641355	13.0150536037177	12.8231608609036	13.0271156703887	12.6250892353687	13.0155664657926
ENSG00000003137.8_CYP26B1	NA	9.61427492794237	10.9347499284675	9.50952440233769	11.014025202205	9.80181938441704	10.5396793480208
ENSG00000003147.19_ICA1	NA	11.7333811114277	11.8727536774837	11.6329735612802	11.8359028274839	11.6075526463979	11.9222778777237
ENSG00000003249.13_DBNDD1	NA	11.861025282097	11.7264558204646	11.640692474787	11.8946195849816	11.9864608758041	11.8883594042738
ENSG00000003393.15_ALS2	NA	12.3652693085637	12.5443892666417	12.1027719500539	12.5555527299478	12.1517527497844	12.7810599985069
ENSG00000003400.14_CASP10	NA	9.7620751725294	9.751192660289	9.84802110711757	9.79005979538897	9.72223770871329	10.5792669302738
ENSG00000003402.20_CFLAR	NA	12.0098343264075	12.2629316176784	11.7930578461881	12.2744203844598	11.7430584191038	12.4569395338513
ENSG00000003436.16_TFPI	NA	5.86062969349254	0.756704934741344	5.71915043499937	2.13540673558656	5.64990304617006	3.92826874483634
ENSG00000003509.16_NDUFAF7	NA	10.2131160889177	10.167016445073	10.3949984412715	10.274573726623	10.2470158465255	10.1764831003628
ENSG00000003756.17_RBM5	NA	13.5008955142185	13.4781886540346	13.3630885216654	13.4118702558621	13.4684180847123	13.7124411200718
ENSG00000003987.14_MTMR7	NA	11.0491240281773	11.00574786117	10.9971738236724	10.8555575055975	10.8789349410429	10.9712241172171
ENSG00000003989.17_SLC7A2	NA	10.2454989665626	10.9285992763415	10.4332783282868	11.3933963258648	11.0430354683387	11.7421636291091
ENSG00000004059.11_ARF5	NA	14.2585473292672	13.7540148027136	14.4555326038853	13.7482470433353	14.3520534005543	13.776285275737
ENSG00000004139.14_SARM1	NA	11.4358065229339	11.5698543772827	10.9373236909863	11.4532186814287	11.20258568987	11.526893890031
ENSG00000004142.12_POLDIP2	NA	14.1825098896901	14.0423256325096	14.0011812206817	14.1505864727642	14.0741469076454	14.0471593695873
ENSG00000004399.12_PLXND1	NA	12.700220649148	12.6415973940999	12.0164104419142	12.7783945143179	12.6209551712389	12.7971910999982
ENSG00000004455.17_AK2	NA	14.6356714329433	14.3296959351301	15.0152378349381	14.3696048066633	14.8538208487817	14.5558020834857
ENSG00000004468.13_CD38	NA	5.90604538676313	7.8235529714492	5.65961201932851	7.6158421395185	5.04603085491909	6.42765363421362
ENSG00000004478.8_FKBP4	NA	15.7818176329031	15.0568788860008	15.6093494587822	15.2968305911506	15.9445180739729	15.5110273448119
ENSG00000004487.16_KDM1A	NA	14.1962143857502	13.7929876655958	14.1405703632388	13.8549325067106	14.2655861219838	14.1743914700558
ENSG00000004534.15_RBM6	NA	12.9115634756426	13.0943167876423	12.3280321341019	13.1730746934689	12.6547120836164	13.1596350268863
ENSG00000004660.15_CAMKK1	NA	8.68035967955015	8.4813479868781	8.22238215733837	8.45101108275331	8.49995480246494	8.4482115018468
ENSG00000004700.16_RECQL	NA	14.0185341517275	14.0842317762337	13.6026160306969	14.0413023915186	13.526038598613	13.7903158642995
ENSG00000004766.17_VPS50	NA	11.8311693636527	11.7101564271951	12.1944514414155	11.5649727507541	11.9480349567848	11.7394481812472
ENSG00000004776.13_HSPB6	NA	5.16218022398267	6.70040591615791	5.65961201932851	6.69600297817118	5.64990304617006	6.26454350266625
ENSG00000004777.18_ARHGAP33	NA	9.52612119202489	10.3022898268196	9.64040790703438	10.1699689411991	9.90606568351261	9.7757316166742
ENSG00000004779.10_NDUFAB1	NA	13.4728732889133	12.792675705824	14.3459664292477	12.9585548455695	13.8485070530982	13.0411506578894
ENSG00000004799.8_PDK4	NA	8.82037452175731	9.59129494339571	8.96556961745894	9.59321954864626	8.53201179973219	8.91500885205122
ENSG00000004809.14_SLC22A16	NA	5.304650257706	5.12924953688916	6.05576286073086	6.03821586868961	5.93205710182804	5.95783217461331
ENSG00000004838.14_ZMYND10	NA	11.6080126403205	11.50873413041	12.2268622150815	11.4156716633339	12.2639075034515	11.7452607525631
ENSG00000004846.16_ABCB5	NA	6.32922953977086	5.4762587063889	6.57400655729131	4.09151717841578	4.06770151077488	2.97488976375032
ENSG00000004848.8_ARX	NA	3.42230333690735	4.67141626018303	4.97183447980234	5.02778573487983	4.14343816954976	5.03159778070322
ENSG00000004864.13_SLC25A13	NA	12.8199904750726	12.7051738648587	12.5548369145724	12.7851747519352	12.5798018259794	12.689767068085
ENSG00000004866.20_ST7	NA	12.6624678382177	12.4600908893353	12.5152338631976	12.4830800747648	12.589354652017	12.5590304221988
ENSG00000004897.12_CDC27	NA	14.3006048284402	14.5622166851663	14.165447984276	14.542927544837	14.1507738466061	14.5302192914318
ENSG00000004939.15_SLC4A1	NA	1.71695370984036	1.52569523028648	1.39492385926443	2.13540673558656	1.68322706982405	2.5901164547137
ENSG00000004948.15_CALCR	NA	5.16218022398267	5.02768193354761	4.21745153885783	5.30144489193378	4.14343816954976	4.43733738831633
ENSG00000004961.15_HCCS	NA	11.9299804028119	11.655342545026	12.3840010651784	11.7714845845119	12.2107088705073	11.7479652922115
ENSG00000004975.12_DVL2	NA	13.5794302147114	13.8998128683502	13.2848953895886	13.829112223295	13.4922637833479	13.8615280612263
ENSG00000005001.10_PRSS22	NA	9.94318524590439	10.8674445078031	9.86129545570545	10.6018174797695	9.73453496591925	10.0241668208365
ENSG00000005007.12_UPF1	NA	14.4100063439175	14.1926959400357	13.5697635465185	14.2968833971333	14.1283047178816	14.2745228036763
ENSG00000005020.13_SKAP2	NA	12.2098333872663	12.5368998482109	12.6918652378004	12.4170811071552	12.3157256626192	12.3850445527512
ENSG00000005022.6_SLC25A5	NA	16.1100773022139	15.6978969217872	16.7749164191681	15.7458840528546	16.5650396313157	15.8935997051446
ENSG00000005059.16_MCUB	NA	11.9722957934497	11.3813504907266	12.3914546929064	11.4213151870122	12.1021963026694	11.4425923167546
ENSG00000005073.5_HOXA11	NA	8.89829304787814	9.20010366431407	9.27175842545927	9.3779346609594	9.55376948303812	9.68671013381266
ENSG00000005075.15_POLR2J	NA	12.4100441755873	12.1454864852315	12.9884270514724	12.1476910762393	12.7610992257901	12.2289691285814
ENSG00000005100.13_DHX33	NA	12.8088248241532	12.8367441963475	12.2117197964441	12.9166698782044	12.6111932354177	13.2261255805928
ENSG00000005102.13_MEOX1	NA	14.246804658688	14.9902068060158	14.3231379933019	14.8481153130078	14.0650464006545	14.7610872057073
ENSG00000005108.16_THSD7A	NA	12.26043469473	12.4964841053874	11.2356392908879	12.445305264965	11.4805224979411	12.2722855686574
ENSG00000005156.12_LIG3	NA	12.4778798626051	13.2082319338831	12.1225448538439	13.3584505125824	12.3929127963782	12.9334300437453
ENSG00000005175.10_RPAP3	NA	13.2220145499441	12.8874558554403	12.8267602060834	12.944193401905	12.8838324830954	13.3002540182232
ENSG00000005187.12_ACSM3	NA	9.53698848238661	9.37571707363946	9.68774656055661	9.29541211625442	9.53806990849154	9.11501189099668
ENSG00000005189.19_REXO5	NA	9.73244161630523	8.99339252677271	10.2192814310442	8.79245881129831	9.87307432150128	8.83004383073608
ENSG00000005194.15_CIAPIN1	NA	13.71339994479	13.0092366292076	13.8108694251861	13.1507033493045	13.7620800413148	13.2005448228157
ENSG00000005206.17_SPPL2B	NA	11.9762935302291	11.9213517348391	11.9943639940029	11.9019774487675	12.2260319366928	11.8632779055063
ENSG00000005238.19_FAM214B	NA	10.1972189391862	10.5604635995986	9.67652613844519	10.3773924646921	9.7737922099952	10.2216577063255
ENSG00000005243.10_COPZ2	NA	5.60925847691052	4.10053874497786	5.88430571392619	4.09151717841578	5.72578103589589	4.81287631202895
ENSG00000005249.13_PRKAR2B	NA	10.9850954264522	11.5099116387102	10.511136420445	11.3902606146486	10.5402140563733	11.2379414038959
ENSG00000005302.19_MSL3	NA	11.9230932580483	12.0018109797673	12.2670013852484	11.9700668581268	11.9690030485895	11.8589953655863
ENSG00000005339.14_CREBBP	NA	14.0835227311938	14.2985212091509	13.103039205797	14.3920517029898	13.6584932268688	14.4025829401041
ENSG00000005379.17_TSPOAP1	NA	10.6350431702811	10.4222120996374	10.3176593993945	10.1577272189056	10.6227465979704	10.1764831003628
ENSG00000005421.9_PON1	NA	-1	0.756704934741344	2.54210121923842	1.29089905871014	1.20641608165016	1.7051978671648
ENSG00000005436.14_GCFC2	NA	11.7745201747242	12.1129222578564	11.9780813060105	12.2423178567769	11.8433406741164	12.1939780140875
ENSG00000005448.16_WDR54	NA	12.095641617494	11.3928848315443	12.6946488105395	11.333164558	12.5086407717827	11.6916834820519
ENSG00000005469.11_CROT	NA	11.335113857166	10.7427836176249	11.6105488303796	10.740428485187	11.2937035468933	10.6512032162128
ENSG00000005471.17_ABCB4	NA	5.49501216002459	6.74908429156488	5.96029519443599	6.78783043242888	5.95325699868144	6.39647362058023
ENSG00000005483.21_KMT2E	NA	13.4789911295865	13.5430353670487	12.7050396354427	13.5045647476605	12.9934247439824	13.5648988486171
ENSG00000005486.17_RHBDD2	NA	13.622474657778	13.7673692695079	13.5071455396456	13.8000673155833	13.6436947208502	13.7752440316573
ENSG00000005513.10_SOX8	NA	8.94799483505141	8.64033569008214	8.83035968313015	9.35023121436	9.4325778113588	9.51225589815012
ENSG00000005700.15_IBTK	NA	13.1589267013558	13.5963887668089	13.1264208151406	13.5516384678786	13.0584547304478	13.6663136953695
ENSG00000005801.18_ZNF195	NA	12.0320894310768	12.7663128767666	12.547156817442	12.8554549969768	12.4476249744137	12.8594343156315
ENSG00000005810.18_MYCBP2	NA	12.7985131708929	13.1923678037447	11.797380570645	13.3681786674067	12.2818243275468	13.2976193293982
ENSG00000005812.11_FBXL3	NA	12.8901808355889	13.0627711103736	12.8884385366459	13.0832105012356	12.6182616630295	13.1371165480772
ENSG00000005844.18_ITGAL	NA	2.36336513754916	2.68888213318037	-1	1.77408377862989	2.32742628316446	3.27834984296906
ENSG00000005882.12_PDK2	NA	11.7087634358722	11.9984592060906	11.49287830883	11.8938817304709	11.4430784525201	11.5751202968783
ENSG00000005884.18_ITGA3	NA	12.5460346834386	11.4699323418835	11.6940622804662	11.3542378984824	11.8419205424402	11.6718817148996
ENSG00000005889.15_ZFX	NA	12.4525148644813	12.8486597939217	12.4200492455472	12.7797930528818	12.2833945928617	12.7971910999982
ENSG00000005893.15_LAMP2	NA	13.9111686605873	13.8117282530239	14.5130403495333	13.9052267669797	14.1960788731252	13.8596537405817
ENSG00000005961.19_ITGA2B	NA	9.18291947363962	9.12831600337096	9.53459831984329	8.54424245878391	9.5097306144536	8.81832747708658
ENSG00000006007.12_GDE1	NA	14.5125538817297	14.5230970247323	14.6769628098912	14.545924833113	14.5341099597401	14.3779764187287
ENSG00000006015.17_REX1BD	NA	10.7241146941868	8.96962549636953	10.9903934133312	9.21025414030792	10.9386163007448	9.87096522077558
ENSG00000006016.11_CRLF1	NA	11.0884380042936	10.6454226142454	11.0903081466108	10.8318688258078	11.2130598086572	10.8390372647436
ENSG00000006025.12_OSBPL7	NA	7.17508996570617	6.21445287653312	7.00320647154523	5.61971002982966	7.20772096489109	6.69442748963949
ENSG00000006042.12_TMEM98	NA	13.0977016269664	11.8722959580886	13.2977678288595	11.6173157834668	13.1543933760101	12.4604772620115
ENSG00000006047.13_YBX2	NA	8.05150506654561	7.43459436052371	8.85710987042261	7.39167510621562	8.77163555057925	7.90547023109503
ENSG00000006062.17_MAP3K14	NA	11.8178641549361	11.6500118996626	11.0386617588	12.0070432208785	11.4496201260766	12.2010444603881
ENSG00000006071.14_ABCC8	NA	5.55326591186673	5.55137633786445	4.8169430585728	5.19045249987687	5.48501128162734	5.72666758979972
ENSG00000006118.14_TMEM132A	NA	12.8273865206977	12.2279398000204	12.6192506378415	12.4555923270084	12.9666343381196	12.7031679667454
ENSG00000006125.18_AP2B1	NA	14.9658692907782	15.3172050220513	14.4755647268774	15.3919042855209	14.6843006662186	15.3115081029801
ENSG00000006128.12_TAC1	NA	0.515145658870156	-1	0.646045912731413	0.559151537014313	1.20641608165016	-1
ENSG00000006194.10_ZNF263	NA	12.1208406435424	12.3956201990324	11.7243444528344	12.4523385103833	11.9460534834702	12.4331303504607
ENSG00000006210.7_CX3CL1	NA	4.02638871617658	2.68888213318037	2.99170115686585	2.42411916774553	3.8132450374244	2.35084444806025
ENSG00000006282.21_SPATA20	NA	13.1004514987022	12.9870002825679	12.9539911321554	12.9035336681341	13.2561245706166	13.2661610989964
ENSG00000006283.18_CACNA1G	NA	8.97488456976931	8.92088355063967	8.08203103560918	8.84532052977953	8.44862791579574	8.13059441410394
ENSG00000006327.13_TNFRSF12A	NA	12.5977691496572	11.059007413861	12.2616927261416	11.6284476979368	12.335539189808	12.1225334309719
ENSG00000006377.11_DLX6	NA	10.7831181140589	10.475018075122	10.608813262473	10.49104015565	10.6243995927822	10.4589759663825
ENSG00000006432.15_MAP3K9	NA	12.2258727577989	12.9977416903149	11.1758021067234	13.1373615056048	11.6665039457982	12.8098194506378
ENSG00000006451.8_RALA	NA	13.5237248266658	13.6577002767248	13.4006511970864	13.641084639555	13.3015177281128	13.4668769423604
ENSG00000006453.14_BAIAP2L1	NA	12.4799931726805	12.8032795165144	12.0555531982916	12.8596177953305	12.1848964725606	12.5717346357522
ENSG00000006459.11_KDM7A	NA	9.27450905445811	10.9099884045408	9.24921466457827	10.8825875193679	9.38851111677979	10.6878829814458
ENSG00000006468.14_ETV1	NA	10.2432888506164	11.0124099747682	10.2970485921235	10.9976347503824	10.3455101123952	10.9104428746367
ENSG00000006530.18_AGK	NA	12.1806785996731	10.7881358906035	11.7446328793218	10.6383995243939	12.0478004545822	12.0982129290308
ENSG00000006534.16_ALDH3B1	NA	9.29385884901246	8.88865684159034	8.8963275400702	8.39370724426283	8.59406487593891	7.99665993049876
ENSG00000006555.11_TTC22	NA	7.36595057012569	5.65719240652507	6.79762041422384	5.37096293038352	6.75561375202576	5.75152368689837
ENSG00000006576.16_PHTF2	NA	13.6249171973971	13.824206417617	13.8482249721381	13.8518013714091	13.6738400673162	13.8130014683073
ENSG00000006606.8_CCL26	NA	0.515145658870156	0.756704934741344	-1	-1	-1	0.506140336067499
ENSG00000006607.14_FARP2	NA	12.624549820473	12.6958917738185	12.0227007846065	12.7476870291128	12.2927804617062	12.787083359112
ENSG00000006611.16_USH1C	NA	7.18433578242692	6.25995296490819	7.61792067335577	6.12125527569217	7.63253152094877	6.58804795542626
ENSG00000006625.18_GGCT	NA	13.2416612947086	13.0421649298508	13.2997497689263	13.0281247228819	13.1563942306683	13.0644304084408
ENSG00000006634.8_DBF4	NA	12.4893483882285	12.769265982421	13.0578125628028	12.8776434710535	12.8268248640989	12.8724171664857
ENSG00000006638.11_TBXA2R	NA	6.5018599015896	6.48739047558888	6.18807227539753	6.01668709729579	6.2387280382889	5.77595878310884
ENSG00000006652.14_IFRD1	NA	14.3076289521144	14.3037074255224	14.7763871636494	14.4487294014928	14.5161918668439	14.4503937210623
ENSG00000006695.12_COX10	NA	11.1842943120073	11.3222535992432	11.0704425432013	11.5202528839233	11.1802831723085	11.4568316934755
ENSG00000006704.10_GTF2IRD1	NA	12.3271695989715	12.3911540624586	11.9296767780083	12.2690244860324	12.1554732115906	12.3112078200202
ENSG00000006712.15_PAF1	NA	13.724632972756	13.3398640207992	13.3047686533077	13.3799509613699	13.4374876044073	13.3151805558616
ENSG00000006715.16_VPS41	NA	12.8020837171497	12.8535377545555	12.6525591738298	12.8162714324947	12.6136919309314	12.8686943290136
ENSG00000006740.17_ARHGAP44	NA	10.4557671100378	10.0761366204884	10.008754301935	9.88964689750098	10.2111653354757	10.3513018758621
ENSG00000006744.19_ELAC2	NA	13.5365291874485	12.6729475851207	12.8841773906992	12.7795933446433	13.2838453085073	13.0414656381246
ENSG00000006747.15_SCIN	NA	5.99280043652845	5.35569725243715	5.6896883408744	5.56142747981494	5.29881181275606	5.51070973259353
ENSG00000006756.16_ARSD	NA	11.2043158716281	11.5151985651224	11.0016764579634	11.2519989855222	10.8474346111328	11.1080334903403
ENSG00000006757.12_PNPLA4	NA	10.3903580231317	10.5717840599174	10.8274808202975	10.5827148457762	10.5985628701722	10.4533055204801
ENSG00000006831.10_ADIPOR2	NA	14.5652598248867	14.8359075282544	14.1406554229424	14.9048828528275	14.3640994451446	14.8318099507153
ENSG00000006837.12_CDKL3	NA	8.20020094931872	8.551641197911	9.46891069398231	8.47488981826644	8.63071279470424	8.15874148764682
ENSG00000007001.12_UPP2	NA	0.515145658870156	-1	-1	1.29089905871014	0.489356241498477	1.22681122250844
ENSG00000007038.11_PRSS21	NA	1.71695370984036	-1	2.78434487607049	-1	1.20641608165016	-1
ENSG00000007047.15_MARK4	NA	11.7844342333002	12.1152451767489	11.3143635733993	12.3130175082689	11.6772940769767	12.121341993197
ENSG00000007062.11_PROM1	NA	12.094722515727	12.867614244889	11.8611267188754	13.0375086683986	11.9854965188585	12.6098268503235
ENSG00000007080.11_CCDC124	NA	13.3096462419073	12.9130488823659	13.0111221101246	13.0859587963459	13.4111558915734	12.8880891355036
ENSG00000007168.13_PAFAH1B1	NA	14.5126685791522	14.9556245534881	13.9439397186746	14.9893819010184	14.0798810112641	14.8428305449162
ENSG00000007171.18_NOS2	NA	1.23773309057468	2.93315015163294	-1	2.66457719062308	2.04098824485641	1.22681122250844
ENSG00000007174.18_DNAH9	NA	5.16218022398267	4.91841863361357	5.19793198884244	4.1716266919799	5.3635854813465	4.4973499934803
ENSG00000007202.15_KIAA0100	NA	15.0249597714793	15.2162225597214	14.0683615541783	15.3213214449189	14.6355952269444	15.3324137841073
ENSG00000007237.18_GAS7	NA	7.67229319178344	8.45224283219773	6.72686476422288	8.21620138293195	6.99930535349848	8.18178503401045
ENSG00000007255.10_TRAPPC6A	NA	8.823336703669	8.17781517107293	9.51793088821994	7.81606181885351	9.16142669115727	8.0018486778032
ENSG00000007264.15_MATK	NA	11.0306606463773	10.1292046481944	11.1949330404225	10.5652108209409	11.7649547303818	10.9922326026502
ENSG00000007312.12_CD79B	NA	2.07606432475589	3.88513758306847	1.88542602307657	3.60654045142147	2.56630615203523	2.35084444806025
ENSG00000007314.12_SCN4A	NA	8.80547168899131	11.1674490753087	9.0635742031448	11.21230288608	9.40013717250137	10.944525856003
ENSG00000007341.19_ST7L	NA	11.5559831454642	10.8292787090136	11.9320376791652	10.7130821392959	11.7479951896103	11.2079483188367
ENSG00000007350.17_TKTL1	NA	1.23773309057468	-1	1.88542602307657	-1	1.20641608165016	2.35084444806025
ENSG00000007372.23_PAX6	NA	10.9657885301157	11.4717463528936	11.0180669209384	11.3691798692968	10.9151742440677	11.311349752027
ENSG00000007376.8_RPUSD1	NA	12.7605756167041	12.6253914773576	12.3345905689264	12.9537835647731	12.8300517482076	12.7164455319442
ENSG00000007384.15_RHBDF1	NA	11.0151998637073	10.9277184672533	10.443243493703	11.0031189505721	10.5454584676002	10.8030788932134
ENSG00000007392.16_LUC7L	NA	13.3326972926963	13.2018707704637	13.4813169879688	13.0773732421655	13.5495019337513	13.2993324243471
ENSG00000007402.11_CACNA2D2	NA	9.36266713945734	9.751192660289	9.10322132655629	9.74002920846946	9.27101454611818	9.67213804144274
ENSG00000007516.13_BAIAP3	NA	10.3993186548873	9.84188279680426	10.3176593993945	9.9145971376854	10.7463084137956	10.6935058291148
ENSG00000007520.4_TSR3	NA	13.0142905169443	12.3490088985735	12.7132987457065	12.6221099934696	12.901663755959	12.5116186853595
ENSG00000007541.16_PIGQ	NA	12.5549725980026	12.351966642457	12.4370486532204	12.3016576759106	12.7362802644254	12.6615617550377
ENSG00000007545.15_CRAMP1	NA	12.445082030551	12.7626129738161	11.7252522451355	12.828872292701	12.1471605094983	12.930711997269
ENSG00000007866.21_TEAD3	NA	12.5629696492779	12.3882756565431	11.9947404831775	12.2207084784169	12.0752547333087	12.2021718867048
ENSG00000007923.16_DNAJC11	NA	13.1156338461456	13.2864117708244	12.5433013825709	13.3746719242843	12.9296763193127	13.2827754888025
ENSG00000007933.13_FMO3	NA	2.36336513754916	-1	3.17296538656624	1.29089905871014	2.56630615203523	1.22681122250844
ENSG00000007944.15_MYLIP	NA	11.5098424720704	11.3342682272282	11.4528829955994	11.1003486057672	11.3497365289632	11.4068556328136
ENSG00000007952.18_NOX1	NA	5.66315885674697	4.67141626018303	5.23919056391335	4.51653564172377	5.12288373895234	4.6637219601316
ENSG00000007968.7_E2F2	NA	11.5577628564988	11.3890502884855	10.972154963148	11.4617080446966	11.2911041455075	11.4844323444323
ENSG00000008018.9_PSMB1	NA	14.8916538308862	14.4917046893333	15.6152991716069	14.4558085091399	15.2391094234021	14.6138762932017
ENSG00000008056.14_SYN1	NA	8.22281148426631	10.3725872237707	8.01234158090131	10.5991039692202	8.15584419565553	9.35894793803101
ENSG00000008083.14_JARID2	NA	10.9380440359014	11.6680563024524	10.4299412514157	11.652203443599	10.76366273527	11.452574617962
ENSG00000008086.12_CDKL5	NA	10.3883591909032	10.3673996284143	9.68960817597208	10.0781197227861	9.97116751441017	10.6757597166753
ENSG00000008118.10_CAMK1G	NA	2.07606432475589	-1	3.61041742401945	-1	3.38432637629481	3.13458395655897
ENSG00000008128.23_CDK11A	NA	12.0653105727562	12.1990301520759	11.4369016851292	12.2257015101678	11.8990292289442	12.0526880147176
ENSG00000008130.15_NADK	NA	13.7044907075602	13.8593903707988	13.3850828613101	13.7760425476595	13.5731248134642	13.7025164722562
ENSG00000008226.20_DLEC1	NA	4.10638949628379	5.4762587063889	4.8169430585728	5.88029728737159	5.72578103589589	5.79998690265534
ENSG00000008256.16_CYTH3	NA	11.9898694805318	12.1035929987478	11.4429844196031	12.1936832172931	11.679283423501	12.1165663782619
ENSG00000008277.14_ADAM22	NA	11.7131618532827	11.1357637667367	11.1982059886958	11.082974386537	11.3387026827905	11.5349698435655
ENSG00000008282.8_SYPL1	NA	13.8554638119605	14.3726434963144	14.0610097551978	14.3333281380207	13.9165348556621	14.3887238213293
ENSG00000008283.16_CYB561	NA	14.0732166369074	13.7810890025396	13.5765702289751	13.8521812650931	13.8638942548744	14.0274978418544
ENSG00000008294.21_SPAG9	NA	12.9601451646413	13.5772788728181	12.0713461319308	13.6757309330374	12.3309909298486	13.4282555589498
ENSG00000008300.17_CELSR3	NA	9.43996881459226	11.467510107016	9.37947768926496	11.508732435553	9.72069315518516	10.3359761216094
ENSG00000008311.15_AASS	NA	11.6954871486264	12.8829186612874	11.0046704260219	12.8800672248438	11.163327071532	12.3468155244439
ENSG00000008323.15_PLEKHG6	NA	11.5226561875576	10.6129139597386	10.9903934133312	10.4524740622712	11.1953751205085	10.6478972068008
ENSG00000008324.11_SS18L2	NA	11.7286490694528	11.0082497603661	12.7265064324093	11.1054565954099	12.1546154946639	11.2494390350089
ENSG00000008382.15_MPND	NA	10.6601117971431	10.4433204779176	10.3533282435382	10.2768394193757	10.6391919318091	10.4294357888874
ENSG00000008394.13_MGST1	NA	13.875045519807	14.3175589554356	14.62099490148	14.4194196535276	14.3356237258271	14.6103773765702
ENSG00000008405.12_CRY1	NA	12.1809673097064	12.4299273334214	12.430384242566	12.529186411643	12.3610452769819	12.414039271047
ENSG00000008438.5_PGLYRP1	NA	2.80817268973273	1.52569523028648	1.39492385926443	3.21110909091156	1.68322706982405	1.22681122250844
ENSG00000008441.16_NFIX	NA	11.4187706715389	11.3128392191109	11.2546268119846	11.3771212901258	11.583535637475	11.6530416585204
ENSG00000008513.16_ST3GAL1	NA	9.6860043271076	10.2440427681089	9.23653644346516	10.6188855322644	9.65428180444484	10.2932355358089
ENSG00000008516.17_MMP25	NA	6.62919154295833	6.91471212958773	6.42105274292658	6.9328088961184	6.79136915835971	6.99428418099296
ENSG00000008517.16_IL32	NA	4.77847218357551	7.25523895740579	5.2793019470116	8.34702962048204	5.56981165558017	8.6988113367388
ENSG00000008710.19_PKD1	NA	12.0078827770564	12.8282735373261	11.5902634774637	13.0168167083618	12.1918808015379	12.6436233088025
ENSG00000008735.14_MAPK8IP2	NA	10.9194774983806	12.5654949341672	10.4575171796278	12.6303285844761	10.5748219888875	11.4816494952635
ENSG00000008838.20_MED24	NA	13.7491783145	13.3824340093604	13.1233250751396	13.4537768936947	13.4854583664008	13.4784390788846
ENSG00000008853.16_RHOBTB2	NA	11.6820875517699	11.3422227497766	10.9629485394981	11.4161856241583	11.369584389925	11.7120088365595
ENSG00000008869.12_HEATR5B	NA	12.2225108352579	12.5455380418037	11.5882690617617	12.6172009756898	11.9381002629602	12.5710802576391
ENSG00000008952.17_SEC62	NA	14.4515810076667	14.9642944535145	14.2016112287631	14.9891660192842	14.1226871522886	14.8706176649884
ENSG00000008988.9_RPS20	NA	16.5688823341788	16.4553369923122	17.3337858250516	16.382639209618	16.8059762371385	16.2915941312799
ENSG00000009307.16_CSDE1	NA	16.0728158019139	16.2086185579077	15.6863318440093	16.281494843936	15.8084726517382	16.3910177587285
ENSG00000009335.18_UBE3C	NA	14.3649126645472	14.502762482274	14.1022995906735	14.5750423948614	14.2763372675923	14.6234284877523
ENSG00000009413.15_REV3L	NA	12.4696318800105	12.9252358997832	11.616921667671	12.9546683266206	11.9699784899656	13.0732376796276
ENSG00000009694.13_TENM1	NA	6.86594729743328	6.81153465423849	6.45647131806853	6.9328088961184	6.57593133621635	7.00466009205321
ENSG00000009709.12_PAX7	NA	-1	-1	-1	0.559151537014313	-1	0.506140336067499
ENSG00000009724.17_MASP2	NA	6.39441910072232	7.96076698003453	6.36623913012361	8.12356842037078	6.53433353225127	7.49879431976554
ENSG00000009765.14_IYD	NA	2.80817268973273	3.48628246289959	3.33397612761004	2.66457719062308	2.32742628316446	3.27834984296906
ENSG00000009780.15_FAM76A	NA	10.8050114286759	10.495373133089	11.408359902244	10.498825303692	11.1194579228227	10.5208266970933
ENSG00000009790.15_TRAF3IP3	NA	4.18218615561834	6.04285210515835	4.04204020973965	4.98408245359002	4.47194437098392	5.11057554135507
ENSG00000009830.11_POMT2	NA	12.5821147957778	11.9129198813096	12.2815774144206	11.8266535492116	12.5967411417346	12.525195934671
ENSG00000009844.16_VTA1	NA	13.4736983570587	13.5876324311178	13.7661394253302	13.6591089851154	13.6635265142007	13.6898129498576
ENSG00000009950.16_MLXIPL	NA	9.8989416691617	10.8489531463188	10.4748931141187	10.65678347746	10.8995594304091	11.0615805003247
ENSG00000009954.11_BAZ1B	NA	14.8491857053137	14.9982524978177	14.0104269210642	15.0450659631867	14.4229249830282	15.0829622906697
ENSG00000010017.13_RANBP9	NA	12.7580622229179	12.9618366825011	12.4180856199088	12.9454401733718	12.5413826698778	13.1760810348882
ENSG00000010030.14_ETV7	NA	6.55984327715785	6.19115314438693	6.18807227539753	5.97264110587286	5.86652161243344	6.34840248199515
ENSG00000010072.16_SPRTN	NA	11.9572048373053	12.195009382839	11.9852986527165	12.323466857065	11.9143119668833	12.1771626758081
ENSG00000010165.20_EEF1AKNMT	NA	12.741911113783	12.5790218308131	12.2367634821637	12.7394962910901	12.5748947338718	12.7280373830993
ENSG00000010219.13_DYRK4	NA	11.4148483545069	9.51593771815914	11.7650814098357	9.38635286887511	11.5569497527393	10.6118707554139
ENSG00000010244.18_ZNF207	NA	14.9790452361917	14.7914499908255	14.9702875948191	14.8818106940807	14.9538039983162	15.0090332655385
ENSG00000010256.11_UQCRC1	NA	14.7454479687151	14.3409048269115	14.6972299104363	14.4347832070946	14.8152628550017	14.4506309133555
ENSG00000010270.13_STARD3NL	NA	13.0912648025357	13.0458227671883	14.094592339175	13.0493190867769	13.6492873363732	13.0031682889432
ENSG00000010278.14_CD9	NA	15.4908114611178	15.2165832062062	16.6388034148927	15.0979998537777	16.110249869701	15.1828917955765
ENSG00000010282.15_HHATL	NA	-1	1.52569523028648	-1	0.559151537014313	-1	1.22681122250844
ENSG00000010292.13_NCAPD2	NA	15.4581905188477	15.5441399299101	14.8721168722788	15.5327576648593	15.1209114980467	15.3600143985813
ENSG00000010295.19_IFFO1	NA	4.45089343465466	6.52514948461656	4.64339949666533	6.52355928036077	5.29881181275606	5.53953960774465
ENSG00000010310.9_GIPR	NA	6.39441910072232	6.25995296490819	6.38474269996264	6.4770235319412	6.11249565376677	5.84687490664973
ENSG00000010318.21_PHF7	NA	9.1736645465569	9.89151408765297	9.53252539106204	9.86275006121082	9.28362278278767	9.20324306458238
ENSG00000010319.7_SEMA3G	NA	9.09740677325421	9.13443664435973	8.99898303349195	9.00143545335414	9.50435446032446	9.46419509439643
ENSG00000010322.16_NISCH	NA	13.1859329997105	13.8377502729355	12.8265487282931	13.9083355294031	13.2191357400446	13.6139050622235
ENSG00000010327.10_STAB1	NA	3.42230333690735	5.5143063660196	4.37382872199675	5.30144489193378	4.73934757699469	3.92826874483634
ENSG00000010361.14_FUZ	NA	8.823336703669	8.24157947147047	8.84044921715413	8.27631974208623	8.96928679435594	7.8999223218269
ENSG00000010379.16_SLC6A13	NA	7.4603097712268	6.92886737263829	6.91684312474096	6.82546361841024	6.96840102314138	6.87493438203729
ENSG00000010404.18_IDS	NA	12.7326844780233	13.1015597192426	12.4186469285784	13.1323654318871	12.5233337605831	13.1530912203566
ENSG00000010438.16_PRSS3	NA	4.56854660052181	5.12924953688916	4.51490120850092	4.98408245359002	4.41195641161188	4.94804485599476
ENSG00000010539.11_ZNF200	NA	10.9664586042053	12.1680383316449	11.3699845803193	12.1704135045661	11.3035387778298	11.8158242190464
ENSG00000010610.10_CD4	NA	8.1585869469271	8.24723887518356	8.47641289158135	7.78456255503767	8.38764162002195	8.48573071558907
ENSG00000010626.15_LRRC23	NA	10.4346147922333	10.3699957577643	10.6956701054938	10.2179227920703	10.4610217729888	10.2697686420523
ENSG00000010671.15_BTK	NA	4.3227867387809	4.67141626018303	3.84231048575071	3.7174550846552	4.14343816954976	3.7423767631696
ENSG00000010704.18_HFE	NA	7.22073766388815	5.39701401244114	7.38961084643946	5.19045249987687	7.09778529861145	4.94804485599476
ENSG00000010803.16_SCMH1	NA	11.6233899687579	11.9528641523621	11.4043979593973	11.9588218644826	11.5852341482785	11.8925557855255
ENSG00000010810.17_FYN	NA	11.1888952267622	11.3020041603405	10.884666767009	11.2990165137059	10.9616835345425	11.2575958875523
ENSG00000010818.10_HIVEP2	NA	9.50598269558483	10.6497022771935	8.9250566541061	10.6886149903518	9.12218630750781	10.3037774121602
ENSG00000010932.17_FMO1	NA	3.42230333690735	-1	2.99170115686585	-1	3.71737006492186	-1
ENSG00000011007.12_ELOA	NA	13.5207625387068	13.4417877981379	12.9572787898569	13.5696534836579	13.2202292549146	13.6815508442841
ENSG00000011009.11_LYPLA2	NA	13.2231364472104	13.1746576989364	13.2084011879167	13.3675144439944	13.4640398376437	13.3416396385817
ENSG00000011021.23_CLCN6	NA	11.2368946630843	12.6043235518118	11.0839525568104	12.6071074738623	11.3296117978088	12.3658051466596
ENSG00000011028.14_MRC2	NA	10.9373606304028	11.022345814543	10.5142910727335	10.8202654028901	10.8975101989631	11.0238204097425
ENSG00000011052.21_NME1-NME2	NA	14.5601083338167	9.04629040224223	15.4698391867342	9.48567677323611	15.366800529542	8.97692003717558
ENSG00000011105.14_TSPAN9	NA	12.3583933019198	12.8320444160872	12.0007509862697	12.8188004246445	12.2120836375362	12.7441884809054
ENSG00000011114.15_BTBD7	NA	13.1351350124928	13.2129392789943	12.4172432472142	13.2969890033005	12.6514730521134	13.3018325250676
ENSG00000011132.12_APBA3	NA	10.5800615918224	10.7695759291534	10.8044717874351	10.9458924825948	10.8253272235355	10.8825846136825
ENSG00000011143.16_MKS1	NA	11.6165758274373	11.0157295302925	11.4060972673615	10.7445270215853	11.566009625156	11.2726997109225
ENSG00000011198.10_ABHD5	NA	12.6756403357933	12.6616021003533	12.8725475764023	12.6776091941925	12.6539030072386	12.6570466229301
ENSG00000011201.12_ANOS1	NA	9.19669148765993	9.10668692781766	8.85379309638293	9.28193966631204	9.74368960598894	10.135760588795
ENSG00000011243.18_AKAP8L	NA	12.7208193916126	13.331063954553	12.2450156930762	13.373878400003	12.4904015202916	12.9919669867601
ENSG00000011258.16_MBTD1	NA	11.752544127319	12.7235607866063	11.5706993033413	12.7409330312369	11.6249970113835	12.4701030226286
ENSG00000011260.14_UTP18	NA	13.1012144226874	12.5586836253917	13.2784158418215	12.7390855309664	13.203047652649	12.630702090957
ENSG00000011275.18_RNF216	NA	12.7928574125151	12.5229702474606	12.2778698519507	12.562998297572	12.6447694946196	12.8160924139785
ENSG00000011295.16_TTC19	NA	13.0756671763667	12.6969260713083	13.1429900149858	12.7474828263877	12.94810867971	12.9300316847679
ENSG00000011304.20_PTBP1	NA	16.1411797839734	15.8898620851538	15.667534332441	16.0622532936726	15.9910868806459	16.0385533226853
ENSG00000011332.19_DPF1	NA	9.9634664161181	9.04629040224223	9.41366802086812	8.90805451007197	9.70046201558645	9.59869777941432
ENSG00000011347.9_SYT7	NA	9.39488326137488	9.30421902460512	9.21601665689936	9.83380420075887	9.77528097774937	10.628739214093
ENSG00000011376.12_LARS2	NA	13.0469692629282	12.5893629329538	12.5215184493064	12.5083676419965	12.8343430635916	12.9011649424098
ENSG00000011405.13_PIK3C2A	NA	13.316889338002	14.2111830359992	12.5550922150185	14.3014114122358	12.8199887583079	14.2871289318012
ENSG00000011422.12_PLAUR	NA	8.97488456976931	9.520618603286	9.17408019296723	9.57860085408357	9.03290202347321	9.17825257743017
ENSG00000011426.11_ANLN	NA	14.6109744577248	14.1852526820259	14.2807742521914	14.2659240167119	14.2907871883085	14.2059964517793
ENSG00000011451.19_WIZ	NA	12.7653967937849	13.0079870773669	12.1073054741194	13.1396974726198	12.5823554374753	12.9901732069744
ENSG00000011454.17_RABGAP1	NA	12.8464406496782	13.038497794782	12.8172128818794	13.031147652739	12.7719528647453	12.8822980213657
ENSG00000011465.17_DCN	NA	-1	-1	0.646045912731413	-1	0.489356241498477	-1
ENSG00000011478.12_QPCTL	NA	11.1750482286573	11.0428282758174	11.7211626739124	11.0548649777288	11.6776921657924	10.9876630661271
ENSG00000011485.15_PPP5C	NA	12.9045876342331	12.76975757954	12.5212571374056	12.7427781686434	12.7756766459545	12.8210545272881
ENSG00000011523.14_CEP68	NA	10.8957523075063	11.4479844135444	10.5618180482328	11.4386205259094	10.8502626589324	11.4392494749975
ENSG00000011566.15_MAP4K3	NA	12.0169675062142	12.1953753707177	11.857819177356	12.2636083303369	11.9095746626366	12.3177240178467
ENSG00000011590.14_ZBTB32	NA	0.515145658870156	3.14198696342875	2.25080803793905	3.35530167321461	2.56630615203523	2.5901164547137
ENSG00000011638.10_TMEM159	NA	11.5582074414291	11.0231707206753	11.9852986527165	10.8555575055975	11.658862222001	10.9679137294615
ENSG00000011677.13_GABRA3	NA	10.5835600153363	11.0845224612188	10.3615255991815	11.2468073827828	10.5074453222878	10.9337066575007
ENSG00000012048.22_BRCA1	NA	12.4965571832685	12.8049593236182	11.8569911057863	12.8446133547608	12.0008494062518	12.5557265608394
ENSG00000012061.15_ERCC1	NA	12.2137894331722	11.8886830494067	12.2042513545049	11.6257838615586	12.2757890941519	12.0319137989983
ENSG00000012124.17_CD22	NA	2.36336513754916	2.39465370156298	1.39492385926443	1.29089905871014	1.68322706982405	3.27834984296906
ENSG00000012171.20_SEMA3B	NA	12.9633376984431	12.2128344904958	12.6489757087041	12.4132243283619	12.9990103736619	12.72352959644
ENSG00000012174.12_MBTPS2	NA	12.159152116587	11.315535316622	12.041044403835	11.090078048337	12.0304503047181	12.2628615116199
ENSG00000012211.13_PRICKLE3	NA	10.4509869248017	10.4334255836217	10.2231424527347	10.6419193383236	10.4674827700361	10.5948027295359
ENSG00000012223.13_LTF	NA	7.63905574101118	9.51593771815914	7.83531082266848	9.17181290607164	6.91537553909814	8.63679156401641
ENSG00000012232.9_EXTL3	NA	13.2828623672687	13.5221797362755	12.6484972401389	13.5292441820476	13.1019659644427	13.4970464901761
ENSG00000012504.15_NR1H4	NA	1.71695370984036	4.67141626018303	2.54210121923842	3.48638317684589	2.77119432927765	4.16869534776854
ENSG00000012660.14_ELOVL5	NA	14.4178666083438	15.1609376943048	14.5165186273005	15.2082760615591	14.4941549045641	15.1024533095399
ENSG00000012779.11_ALOX5	NA	7.13750251769662	6.73303997327368	6.75558476620028	6.19977407597719	7.01954647919673	6.45817400610492
ENSG00000012822.16_CALCOCO1	NA	11.1825651790853	11.650545851407	11.1251160170484	11.3233335994876	10.8636206954075	11.1014019040368
ENSG00000012963.15_UBR7	NA	13.8324918373799	13.6298093768219	13.4077368130067	13.6549778376399	13.3932093747791	13.5537910244358
ENSG00000012983.11_MAP4K5	NA	12.423283290902	12.8530738968147	12.0392205020088	12.8735324346944	12.2411939633705	12.9233817712765
ENSG00000013016.16_EHD3	NA	10.0507287878599	10.1685084968687	9.3886746292663	10.0130155204502	9.62485648399879	10.1227209927092
ENSG00000013275.8_PSMC4	NA	14.2823553472967	14.1377701300517	14.1396343753581	14.2591360325117	14.253486336599	14.2929610784244
ENSG00000013288.9_MAN2B2	NA	12.2478119816731	12.5409374425243	11.6320057867811	12.5508796613266	11.9197070493866	12.3093779980691
ENSG00000013293.6_SLC7A14	NA	1.71695370984036	1.52569523028648	0.646045912731413	-1	1.68322706982405	-1
ENSG00000013297.11_CLDN11	NA	9.58664743236948	9.80782059115136	9.6423315788355	10.1626363798261	9.84073352747547	9.55700568550415
ENSG00000013306.16_SLC25A39	NA	14.7637297949215	14.2643922046857	14.8127139362274	14.3464661009207	14.9823227541577	14.7402340853962
ENSG00000013364.19_MVP	NA	8.66392932275553	8.06698312636747	8.04178902021808	7.79091766758919	8.32396305486701	7.80218941630972
ENSG00000013374.16_NUB1	NA	12.9606497188412	13.2726033620314	12.9069594786394	13.2529284740985	12.8347000976941	13.061793235511
ENSG00000013375.16_PGM3	NA	13.8189206325831	13.8406778396341	13.8461400724418	13.8669196287592	13.6601057901616	13.8649135115618
ENSG00000013392.8_RWDD2A	NA	10.9132351726176	10.3995202213879	11.8260134535659	10.3805562392777	11.3019902972768	10.2194322576421
ENSG00000013441.16_CLK1	NA	12.0762164369057	12.4227558128163	13.0801596714229	12.2845891749771	12.6349629228139	12.5519730152507
ENSG00000013503.10_POLR3B	NA	11.9237834539142	11.0157295302925	11.4490416155068	11.2502705262467	11.7025528643366	11.7092359787237
ENSG00000013523.10_ANGEL1	NA	11.8685729595123	11.5040144629477	11.6227794050098	11.5000313229456	11.9331071430852	12.0564332149169
ENSG00000013561.18_RNF14	NA	12.9394756775341	13.0429785844387	13.6519065068193	13.0460019782858	13.3043562694627	12.9658192998053
ENSG00000013563.14_DNASE1L1	NA	9.83873333339271	9.37829829215377	9.79539745087399	9.11722592138482	9.79743007923168	9.59526908914277
ENSG00000013573.17_DDX11	NA	13.6633423725932	13.6591603708617	13.2074269939773	13.7088306900118	13.6318278222934	13.6639630371505
ENSG00000013583.10_HEBP1	NA	12.828492664521	12.4673827364141	13.0307145284757	12.4793959775499	12.8905450637364	12.5029531987758
ENSG00000013588.8_GPRC5A	NA	14.6907421485455	14.5122680285806	13.8721921539287	14.4144119656671	13.7253894362874	14.7242346219726
ENSG00000013619.14_MAMLD1	NA	8.72222297226789	7.91171966432102	8.2828244392867	7.91828965289644	8.60749935099327	8.74904697558996
ENSG00000013725.14_CD6	NA	5.6893722229014	3.99685448657254	5.59751035791575	4.45383714145649	5.82111669408114	5.35722831841126
ENSG00000013810.19_TACC3	NA	14.1664886711722	14.1913204530415	13.5281048990597	14.213663871471	13.8431934336527	14.1087999333321
ENSG00000014123.10_UFL1	NA	13.0483940628943	13.2125777203309	12.8475445356021	13.2194555041727	12.7370444489765	13.2868993613722
ENSG00000014138.9_POLA2	NA	12.3553267480145	12.0393992050792	11.9449540241994	12.1154560803891	11.934440332328	12.0121223093
ENSG00000014164.7_ZC3H3	NA	11.4387068622075	11.5257146468599	10.8773350297748	11.6394943752163	11.2408042424541	11.5277934539263
ENSG00000014216.15_CAPN1	NA	14.4848178425761	14.1268749040122	14.084369460437	14.0655034122264	14.2360229709944	13.9725623908398
ENSG00000014257.16_ACPP	NA	9.61427492794237	9.18248884908377	9.67088303214359	8.58869201638777	9.1499957803486	8.79161252083552
ENSG00000014641.19_MDH1	NA	14.8912568928436	14.3534218519075	15.8715668316833	14.3023848196934	15.3699755536916	14.7149835621923
ENSG00000014824.14_SLC30A9	NA	13.2785520072217	13.471858006435	13.4868142682379	13.4523994414044	13.311043430904	13.5564382644666
ENSG00000014914.21_MTMR11	NA	9.35449943369875	8.37680252179949	9.47107700223908	8.02457705917452	9.25829514930013	8.43676279357731
ENSG00000014919.12_COX15	NA	12.6431096051086	12.7892853558317	12.8796997927917	12.7378525484257	12.774188286659	12.6901689025934
ENSG00000015133.19_CCDC88C	NA	11.678820335727	11.6988428092113	11.2646522273698	11.7973613334577	11.8233304814807	11.9584227800028
ENSG00000015153.14_YAF2	NA	11.1134595885733	11.7664164114476	11.8072739568509	11.9267171609891	11.6556325051132	11.7879365157441
ENSG00000015171.19_ZMYND11	NA	13.7960143506249	13.891818468353	13.4354589976813	13.8805781485294	13.676431875452	14.1888238683831
ENSG00000015285.10_WAS	NA	6.11387222717871	6.44861659573961	6.07867434104344	5.85625728763042	6.35479856838868	5.42059333157581
ENSG00000015413.9_DPEP1	NA	1.23773309057468	-1	0.646045912731413	-1	1.20641608165016	1.22681122250844
ENSG00000015475.18_BID	NA	12.2325731908347	11.8148592248923	12.037759718525	12.0060193099924	12.2352564421334	12.209478760108
ENSG00000015479.19_MATR3	NA	16.0068231189349	16.0821240397844	15.4264724008772	16.059685599104	15.5770070303849	16.1598018087199
ENSG00000015520.14_NPC1L1	NA	5.08529646069359	6.4087717801668	3.94562896621183	6.56864075311268	4.78735669962169	6.04083613276453
ENSG00000015532.10_XYLT2	NA	12.6497998549344	12.201583001263	12.3727479182499	12.1138727936688	12.5937910824866	12.275234745981
ENSG00000015568.13_RGPD5	NA	10.1052918024238	10.7205788696884	8.93136394766133	11.2725805671092	9.31671578916213	10.6437540128755
ENSG00000015592.16_STMN4	NA	0.515145658870156	2.39465370156298	-1	1.29089905871014	1.20641608165016	-1
ENSG00000015676.18_NUDCD3	NA	13.7383316950036	13.5936147312565	13.6034802918791	13.6636612693871	13.7069807329253	13.6386828030105
ENSG00000016082.15_ISL1	NA	9.49487841137639	8.37163008871536	9.12814519891612	8.38533196484086	8.86966809355413	8.57894582174623
ENSG00000016391.11_CHDH	NA	11.0015344143267	10.8433592032305	10.6205706780566	10.9705966033049	11.1797211679627	11.441638009219
ENSG00000016402.13_IL20RA	NA	5.88351624213839	6.04285210515835	6.7697331737744	6.19977407597719	6.57593133621635	6.48806206963984
ENSG00000016602.9_CLCA4	NA	-1	1.52569523028648	0.646045912731413	-1	-1	-1
ENSG00000016864.18_GLT8D1	NA	12.9056361631706	12.2625823746663	12.9532164756149	12.1984717405634	12.8271837634086	12.3710777538823
ENSG00000017260.19_ATP2C1	NA	14.2454939979974	14.4010041455334	14.0285585938098	14.4407947051892	14.1250973593042	14.2491115724538
ENSG00000017427.16_IGF1	NA	-1	2.02463226269727	1.39492385926443	3.05088813838361	1.68322706982405	3.52893957787693
ENSG00000017483.15_SLC38A5	NA	3.75573554863011	5.12924953688916	5.31832821128262	5.07020395390465	4.96485248987751	4.6637219601316
ENSG00000017797.13_RALBP1	NA	14.0707259483477	14.3845683815247	13.7925806217494	14.2706211477894	13.9779475108577	14.347221345699
ENSG00000018189.13_RUFY3	NA	10.676585440386	10.589714038008	10.3615255991815	10.673217097153	10.5628034182886	10.9922326026502
ENSG00000018236.15_CNTN1	NA	11.6187087059664	11.7898720445591	11.0973372297085	11.666962540199	11.11828526367	11.2929480706826
ENSG00000018280.17_SLC11A1	NA	5.6893722229014	6.32562063280382	6.68268344625617	6.08033294301964	6.01504926847251	5.8697595673497
ENSG00000018408.14_WWTR1	NA	11.4621772211462	11.9111384573624	11.1955882243567	12.0026010158431	11.224003657272	11.7277523073245
ENSG00000018510.16_AGPS	NA	13.1245170581678	13.3065409320212	12.889046245674	13.2925170492949	13.0325444302773	13.4688689609821
ENSG00000018610.14_CXorf56	NA	11.9789525469779	11.6874397680897	11.7978121315775	11.6777192941955	11.7289144361986	11.6964917442816
ENSG00000018625.15_ATP1A2	NA	10.0097089858071	9.290580809307	10.7358625155666	9.16448973455643	10.5985628701722	9.80719208723691
ENSG00000018699.13_TTC27	NA	11.7502112656636	11.3448645407253	11.6430961902457	11.3579879243787	11.7600757517649	11.7537437178846
ENSG00000018869.16_ZNF582	NA	8.02086674001747	8.551641197911	8.80310411329991	8.55174647456005	8.53553011327276	8.45957007212397
ENSG00000019102.12_VSIG2	NA	4.5109190264711	3.48628246289959	3.84231048575071	2.66457719062308	3.8132450374244	0.506140336067499
ENSG00000019144.19_PHLDB1	NA	12.3904542972096	12.414291329447	11.8636024082163	12.1725445106873	12.0704120007683	12.0994236136084
ENSG00000019186.10_CYP24A1	NA	0.515145658870156	-1	-1	0.559151537014313	-1	-1
ENSG00000019485.13_PRDM11	NA	12.0740418494219	12.5287906012351	11.6095658904599	12.5348770432689	12.3844020901548	12.9606656502891
ENSG00000019505.8_SYT13	NA	12.2075679095336	12.1078763991515	11.9750315880765	12.2210026650048	12.461562923711	12.6758347898868
ENSG00000019549.13_SNAI2	NA	7.27367419472872	6.66701655183661	7.5457586708535	6.89790712697727	7.15380003766317	6.96270104688074
ENSG00000019582.15_CD74	NA	11.847993823642	12.1367472742958	11.8808142913875	12.3099785174993	11.9605214820982	12.1742930923537
ENSG00000019995.6_ZRANB1	NA	11.9885506071978	12.4127183679807	11.6001944075115	12.4311350679641	11.8092290267855	12.4247034304289
ENSG00000020129.16_NCDN	NA	12.6211495108794	12.7984692621296	11.8718241575676	12.9937590948576	12.4431830701707	12.9196169713512
ENSG00000020181.18_ADGRA2	NA	9.43416738063901	8.30806969810796	9.08636293851391	8.06184243799014	9.28571348430975	9.05137593683296
ENSG00000020256.20_ZFP64	NA	11.382075779209	12.4561256962349	11.0796998886444	12.3335690138789	11.3341644008612	12.1320296762646
ENSG00000020426.11_MNAT1	NA	11.7087634358722	10.3292211241947	12.4367715832213	10.1965405821352	11.8901248452409	11.1366198221909
ENSG00000020577.13_SAMD4A	NA	9.17829943141098	10.2651162734181	8.68115492284914	10.7880647973823	8.95884290356648	10.7669634234422
ENSG00000020633.18_RUNX3	NA	11.5394158979906	11.4783782801655	11.0945297047736	11.6069980016234	11.5316275820018	11.9314843299445
ENSG00000020922.12_MRE11	NA	11.5047772091919	12.047125216086	11.5008520463342	12.0746921420111	11.4065592195689	11.6530416585204
ENSG00000021300.14_PLEKHB1	NA	11.6301720767476	11.9532970145136	11.7904579808085	11.7802949298751	11.7705638943057	11.8209707419094
ENSG00000021355.13_SERPINB1	NA	12.2997818567358	12.1583091165904	12.6642035150365	11.9770507288153	12.2268482403148	12.1042562175706
ENSG00000021488.13_SLC7A9	NA	2.98788607713756	4.73724315776088	3.47880794134591	4.2475209474086	2.95057042569612	3.6396016535685
ENSG00000021574.12_SPAST	NA	11.1785224578148	11.9102469198283	11.0473989071941	11.8711939498079	10.9927305565209	11.6624924403683
ENSG00000021645.18_NRXN3	NA	4.82650540552672	4.10053874497786	3.61041742401945	3.82044798456638	4.06770151077488	4.24068908236424
ENSG00000021762.20_OSBPL5	NA	9.86340684709219	8.81053770728513	9.25173699366925	8.48276236856821	9.53631491842053	9.24978255211993
ENSG00000021776.11_AQR	NA	13.2555718243098	13.4022269582523	12.6748151353004	13.4649978291767	12.9165815047434	13.4568753816225
ENSG00000021826.16_CPS1	NA	7.06927180327037	6.06865192195942	6.89118759048906	6.6686560316446	6.69397877064339	6.93041099789034
ENSG00000022267.19_FHL1	NA	11.2139412796449	10.7725223699016	11.4435361258608	10.7130821392959	11.5399718249869	11.1206097637898
ENSG00000022277.12_RTF2	NA	13.6810046362199	13.0627711103736	13.5153034656221	13.0567548122342	13.5539540116324	13.2096829143374
ENSG00000022556.16_NLRP2	NA	4.25419858187711	4.28791805479047	4.70359691329247	4.31962146020119	4.21539643595068	4.09291939637801
ENSG00000022567.9_SLC45A4	NA	11.0994765660333	11.5754889868619	10.5850070116682	11.7866688277406	11.4355657517629	12.0369775096322
ENSG00000022840.16_RNF10	NA	14.3531113017595	14.5130022835742	13.9223324822118	14.6488401072391	14.1759308865688	14.6056456633959
ENSG00000022976.15_ZNF839	NA	10.4384838073759	9.29331878595088	10.3462646754453	9.07878687938485	10.3263418682689	9.87944716847619
ENSG00000023041.11_ZDHHC6	NA	12.6456220859239	12.4404638363066	13.2400272330743	12.4921274930442	12.9800917263633	12.4819875886392
ENSG00000023171.18_GRAMD1B	NA	8.37994820698308	8.356000582835	7.86197020574121	8.19239506729126	8.02178983839718	8.26613998594752
ENSG00000023191.17_RNH1	NA	13.9850320267265	13.7430412385757	13.5509418736527	13.8876372147079	13.9892170175178	13.865980952757
ENSG00000023228.14_NDUFS1	NA	14.108325413938	14.6521503815348	14.286782130188	14.7441327910741	14.1639755947657	14.5251041521582
ENSG00000023287.13_RB1CC1	NA	12.4291285691073	13.2900146842217	12.0709891148748	13.3303666923918	12.1054549225483	13.136674367244
ENSG00000023318.8_ERP44	NA	12.8656056590646	12.8095089652948	13.0914687901569	12.8004132077318	12.8181843863135	12.981663197232
ENSG00000023330.15_ALAS1	NA	13.1517271974175	13.2158284909149	12.97245918706	13.3987971338822	13.0963191414439	13.3751391489486
ENSG00000023445.14_BIRC3	NA	6.94422914112465	8.9524060853182	7.73070651510177	10.4684209623134	7.92316886107407	10.8185994954162
ENSG00000023516.9_AKAP11	NA	12.4629993737508	13.3191904327722	11.8561625586508	13.380872810118	12.1411109251608	13.2342771684717
ENSG00000023572.9_GLRX2	NA	11.1320943625199	11.819140334718	11.3335401072153	11.8408882039017	11.057791146025	11.8643465571143
ENSG00000023608.5_SNAPC1	NA	10.5054865566702	10.4929932729558	11.2875725955286	10.6654560806266	11.1059144497619	10.6354317574475
ENSG00000023697.13_DERA	NA	12.8891210094218	12.477349225847	13.503578424755	12.3251098576788	13.1136351472729	12.5424349310866
ENSG00000023734.11_STRAP	NA	15.3041033352618	15.4387668480466	15.7874448638622	15.5942032448434	15.64545976193	15.4760632720052
ENSG00000023839.12_ABCC2	NA	7.7239299853261	7.37380632064146	6.38474269996264	7.59420278639045	6.77954887826356	7.05544896059341
ENSG00000023892.11_DEF6	NA	10.5283573615123	10.0729533386784	10.181415628898	9.88964689750098	10.2232147633938	10.3923801486499
ENSG00000023902.14_PLEKHO1	NA	11.7737547254708	11.8768666302761	11.6521939578323	11.8655599023872	11.7645800095738	11.6397888978871
ENSG00000023909.10_GCLM	NA	12.6315377498666	12.9449588659611	11.7865493768445	13.0129143265134	11.8222506342083	12.8438074457897
ENSG00000024048.10_UBR2	NA	12.6905198362379	12.7598936683196	12.2682476477437	12.8203545268745	12.3751046922765	12.7696979643124
ENSG00000024422.12_EHD2	NA	11.8271168862902	10.8112438405116	11.1022372899964	10.8578294504676	11.7468574333515	11.5389909304428
ENSG00000024526.17_DEPDC1	NA	13.6165102555839	14.2777606990159	14.0852536018675	14.2828612327276	13.7596377487686	14.1781921816918
ENSG00000024862.17_CCDC28A	NA	10.7097795146378	10.816011759728	11.1237397078551	10.8341783532858	10.6400092981483	10.6067715163622
ENSG00000025039.15_RRAGD	NA	11.8628259329898	12.6815944736112	11.7887221306852	12.614740188641	11.8595724971005	12.3780780549057
ENSG00000025156.13_HSF2	NA	11.6178559329068	11.6066424646315	12.095067228358	11.6858411215168	11.928765749871	11.5992841263643
ENSG00000025293.17_PHF20	NA	12.6653596167362	12.96806175574	12.3954522911775	13.0149516687356	12.500337859656	12.8999495358367
ENSG00000025423.11_HSD17B6	NA	8.59280251531897	9.79048308322646	8.54793772447841	9.6309033839123	8.28686877787059	8.85892507337297
ENSG00000025434.19_NR1H3	NA	10.6060952958442	9.67974946514896	10.8854791092519	9.45399027266581	10.7039423298956	9.87096522077558
ENSG00000025708.14_TYMP	NA	8.03115198100175	7.93995054115406	8.33132792411592	8.41443516409812	8.26159856773965	7.39218587180041
ENSG00000025770.19_NCAPH2	NA	13.3329571315167	13.0919598980928	12.874594687461	13.206440193614	13.1640859231678	13.0703078925135
ENSG00000025772.8_TOMM34	NA	12.8761637072781	12.7230531904119	12.8442056721232	12.9619029794814	12.9504168463366	12.8283745765349
ENSG00000025796.14_SEC63	NA	14.0623663424496	14.7858104103484	13.4552911738525	14.8367383297337	13.6542516525678	14.8023751309157
ENSG00000025800.14_KPNA6	NA	13.6877250221893	14.1695981650535	13.0778516342784	14.2164698799419	13.3447742652263	14.172019921149
ENSG00000026025.16_VIM	NA	9.77437262726642	8.63602810970031	9.44926613366287	8.61041356470335	9.59313122668193	9.17136118455488
ENSG00000026036.22_RTEL1-TNFRSF6B	NA	9.51517142067572	10.7377670096293	9.56534005399939	11.0627647157254	10.042141110513	10.564439004607
ENSG00000026103.22_FAS	NA	11.5820138255876	11.1072620453008	12.5402095991449	11.1956345622632	11.8340847315544	11.4793263467632
ENSG00000026297.15_RNASET2	NA	11.4246342247065	10.6314253767567	11.4960730942508	10.8578294504676	11.5223484988245	10.8222703961919
ENSG00000026508.18_CD44	NA	13.4155092273847	12.9316205683823	12.7483284738559	13.1055297338842	12.9719999084715	13.155421309157
ENSG00000026559.14_KCNG1	NA	9.02977253561129	8.87775262296127	9.14452507057481	9.00963239422129	8.93772553344409	8.93684581404196
ENSG00000026652.15_AGPAT4	NA	10.7320175619626	11.5116761011196	10.9373236909863	11.5580032266056	11.0193592074053	11.3367240448404
ENSG00000026751.17_SLAMF7	NA	1.71695370984036	0.756704934741344	-1	0.559151537014313	1.20641608165016	-1
ENSG00000026950.17_BTN3A1	NA	9.81660653783698	9.77293468583684	10.6742061651326	9.6693535889926	10.4748315088242	9.88085599084597
ENSG00000027001.10_MIPEP	NA	11.1669090089225	9.54379789348292	11.8536740583798	9.65200315333393	11.600011432921	10.4989747589246
ENSG00000027075.15_PRKCH	NA	11.8700061461475	13.2630328300072	11.3542266380202	13.0964189687445	11.4180413130203	12.8044473433269
ENSG00000027644.5_INSRR	NA	0.515145658870156	0.756704934741344	0.646045912731413	1.29089905871014	1.20641608165016	0.506140336067499
ENSG00000027697.14_IFNGR1	NA	12.6033806246173	12.7800426118858	13.4396132432707	12.9300474880293	12.9556788298672	12.7789836465229
ENSG00000027847.14_B4GALT7	NA	11.9548431026276	10.547907629398	11.6574349824517	10.3983544131476	11.8542995514041	11.4704641068852
ENSG00000027869.11_SH2D2A	NA	6.05460601105444	5.31316226439304	6.90407238610565	4.89249172950281	7.20772096489109	6.15702154833617
ENSG00000028116.17_VRK2	NA	10.916012874675	10.3036483987839	10.9979252392776	10.3625357481868	10.8317804708762	10.6991068470074
ENSG00000028137.19_TNFRSF1B	NA	4.5109190264711	3.88513758306847	4.58058051926203	3.60654045142147	4.78735669962169	4.90438082386206
ENSG00000028203.18_VEZT	NA	13.5351748130995	13.6156590854206	13.3200218743995	13.535880808662	13.3175720223209	13.7222979600378
ENSG00000028277.21_POU2F2	NA	4.87299080009219	6.48739047558888	3.61041742401945	6.97806877927209	4.83381952276361	6.21178397553761
ENSG00000028310.18_BRD9	NA	12.267248823434	12.0871202074177	11.7508870835981	12.2306773210882	12.1119501643182	12.2741630152749
ENSG00000028528.15_SNX1	NA	13.7089021508375	13.2040549019054	13.7091212391047	13.0938511850339	13.6584932268688	13.4366618164365
ENSG00000028839.10_TBPL1	NA	11.8388744435243	10.9206525679254	12.4351080448574	10.4949379809935	11.9223970436857	11.3300354644955
ENSG00000029153.14_ARNTL2	NA	13.26022456289	13.1136155955019	13.1963399076551	13.0366732932981	13.1015209653188	13.3053778633834
ENSG00000029363.17_BCLAF1	NA	15.1753716852682	15.3387768458638	14.4308428081346	15.3558561275179	14.5802458604784	15.6112119671647
ENSG00000029364.12_SLC39A9	NA	14.4851685853753	14.7673434036237	14.5427602438247	14.8069175112506	14.4734966998058	14.8044181125509
ENSG00000029534.20_ANK1	NA	12.1262478970439	12.4731294240521	10.8342284302962	12.5025712666107	11.1673013573276	12.5317127485231
ENSG00000029639.11_TFB1M	NA	10.7185568153547	10.3318868085905	11.6819562098117	10.3889592084463	11.2790862033255	10.4730553335003
ENSG00000029725.17_RABEP1	NA	13.5786634668346	13.614701658234	12.8823473254626	13.7621611976874	13.252521518666	13.7646946636769
ENSG00000029993.15_HMGB3	NA	14.9902086098547	14.8922463158492	14.8342261640261	14.825077404187	14.807416938817	14.8494117124045
ENSG00000030066.13_NUP160	NA	14.2503168716572	14.4053608487003	14.2626771914374	14.5458074096323	14.3516168637628	14.4513422563454
ENSG00000030110.13_BAK1	NA	13.1056314434257	12.8637050733457	13.0070222022067	12.8558339299233	13.0732056372919	12.9711199558186
ENSG00000030304.14_MUSK	NA	-1	1.52569523028648	-1	0.559151537014313	0.489356241498477	-1
ENSG00000030419.16_IKZF2	NA	9.50229075588953	9.4779336286104	9.08353395483605	9.11469493746868	8.9483228562048	9.256310168475
ENSG00000030582.18_GRN	NA	14.7382562587238	14.7463907680144	14.5540446455517	14.8048092404267	14.7840821265079	14.7800396561879
ENSG00000031003.10_FAM13B	NA	12.8440726005062	13.3212040999767	12.3891653678081	13.3505398143851	12.4487916270939	13.0842863497182
ENSG00000031081.11_ARHGAP31	NA	8.41963554345295	9.16764374206627	7.22479538114556	9.07097462493302	7.56527751407798	8.6200175417066
ENSG00000031691.7_CENPQ	NA	11.1738882905647	11.2669140930868	12.0866148818464	11.4622058667304	11.4750361821638	11.1744491530919
ENSG00000031698.13_SARS	NA	14.314750606215	14.7570290956438	14.8725778631729	14.8262864200631	14.7616316641013	14.8728318452071
ENSG00000031823.14_RANBP3	NA	13.0231740972408	12.9414722093979	12.55458156894	13.05609540856	12.8996175134774	13.0010645370988
ENSG00000032219.19_ARID4A	NA	11.2919278085595	11.6403668203037	10.625441461597	11.7422686672951	10.8159546084466	11.6816145021231
ENSG00000032389.12_EIPR1	NA	12.0451526825508	11.751062758145	11.8081310536203	11.8719434964779	11.9240757466638	11.9610891651406
ENSG00000032444.16_PNPLA6	NA	12.8131152103428	13.5786823519177	12.1508608611548	13.6840773386017	12.4760542790528	12.9935957625276
ENSG00000032742.17_IFT88	NA	10.511927013599	10.4604749031874	10.8895339734828	10.2586134591293	10.6094540113456	10.4749222436168
ENSG00000033011.12_ALG1	NA	12.9695345364138	12.761377561227	12.9011469765788	12.9190289986422	12.9676113818116	12.8400099465677
ENSG00000033030.14_ZCCHC8	NA	11.9371766936101	12.5657780420183	12.244382580753	12.4808707455626	12.1834955401019	12.6072758690432
ENSG00000033050.9_ABCF2	NA	13.2419380564502	13.4543805649805	13.0669720266687	13.6182607663358	13.2822755339529	13.7204303352729
ENSG00000033100.16_CHPF2	NA	13.1929642239803	13.031545448326	12.30635729696	13.0659549569006	12.6378300652177	13.0052689775426
ENSG00000033122.20_LRRC7	NA	5.86062969349254	6.06865192195942	6.07867434104344	5.37096293038352	5.67564168531176	5.79998690265534
ENSG00000033170.16_FUT8	NA	13.0172038964771	12.8411948510373	13.2079141731763	12.6140683357969	12.7963540418682	12.3740820430903
ENSG00000033178.13_UBA6	NA	13.3611300410122	13.7342522680628	13.4886866010712	13.8338325795703	13.4586061924831	13.7846823627327
ENSG00000033327.13_GAB2	NA	11.6615449951798	12.1074875242072	10.9144229070476	11.9517489727118	11.0424173611517	11.8529065899525
ENSG00000033627.16_ATP6V0A1	NA	13.2080583851339	13.8363429279752	12.7527871093494	13.8805781485294	13.0558539156067	13.6556540026457
ENSG00000033800.13_PIAS1	NA	12.1011439657075	12.2646765657085	11.8799993175186	12.3346569138834	11.928765749871	12.331699358382
ENSG00000033867.16_SLC4A7	NA	13.119404599179	13.723507459364	12.8372947651848	13.871049524906	12.9358466429249	13.7455865317597
ENSG00000034053.14_APBA2	NA	12.1600310872894	11.833319640113	11.7641983441675	11.8827683877018	12.1274787486256	12.1144720654651
ENSG00000034152.19_MAP2K3	NA	13.142121055458	12.9023281555184	12.6865149980485	13.1503944710865	13.0159535458834	13.1424121739054
ENSG00000034239.11_EFCAB1	NA	11.318939029699	11.4175639743377	12.3611143190755	11.5255025006083	12.0320079365527	11.695691479276
ENSG00000034510.6_TMSB10	NA	17.687921376995	16.9572809618897	18.6503594548071	17.0193168982565	18.0755528426709	17.1087736006612
ENSG00000034533.11_ASTE1	NA	10.6451229528394	10.2982064178944	11.0016764579634	10.2424746491344	10.8865315317147	10.6016541899829
ENSG00000034677.13_RNF19A	NA	11.5798259599045	11.8589585283273	11.1299227857516	11.9367820638113	11.1159370819836	11.7705614611273
ENSG00000034693.15_PEX3	NA	11.3895897333766	10.1383702700714	12.1020732186283	10.0426099256205	11.7342825340716	10.8937925530236
ENSG00000034713.8_GABARAPL2	NA	12.9841668989954	12.7606358055567	13.8903145664066	12.7127598133613	13.4113952724463	12.7559443418488
ENSG00000035115.22_SH3YL1	NA	12.6096139356388	12.6351368560367	13.0327325485046	12.5985287310585	12.7754906849919	12.583246641779
ENSG00000035141.8_FAM136A	NA	13.6924917390145	13.4003233357638	13.6540532915025	13.4915772636927	13.7507732660524	13.7858108242569
ENSG00000035403.17_VCL	NA	15.5659635923352	15.8922626743536	15.0792986453352	15.9510463136792	15.3534072832167	15.9513968390146
ENSG00000035499.13_DEPDC1B	NA	12.7902104515949	12.7554328099571	13.6526224567165	12.8047376515744	13.3020342421197	12.6921763980008
ENSG00000035664.11_DAPK2	NA	7.83963245029485	7.49292431541601	7.46979628002359	7.57959410208632	7.67781082589643	8.09218982948862
ENSG00000035681.9_NSMAF	NA	12.3190601964713	12.3825015585781	12.0859082792597	12.465061621248	12.1719562896079	12.4290434224493
ENSG00000035687.10_ADSS	NA	12.88682204499	12.744219943409	12.8093152505164	12.9146706818482	12.7529995236444	12.791022566495
ENSG00000035720.8_STAP1	NA	-1	0.756704934741344	0.646045912731413	1.29089905871014	-1	1.22681122250844
ENSG00000035862.12_TIMP2	NA	13.1112473897451	12.748715553216	12.8408590635049	12.5708673351097	12.8622800024809	12.6595111738453
ENSG00000035928.16_RFC1	NA	13.8137168831742	13.7963693364476	13.2444665570199	13.8153449397797	13.4411266098063	13.910459831552
ENSG00000036054.13_TBC1D23	NA	11.9961177163101	12.1256522738546	12.3133166640471	12.0763189922011	12.027642322439	12.2317320961367
ENSG00000036257.13_CUL3	NA	12.776711297605	12.9212587431614	12.2557363102028	13.0679188065216	12.3620363852095	12.8868626583665
ENSG00000036448.10_MYOM2	NA	4.56854660052181	5.58751761179585	5.46466199144988	5.26538795390053	4.87883255396537	3.92826874483634
ENSG00000036473.8_OTC	NA	4.38826155280896	3.32438108835719	4.92202912039724	2.66457719062308	4.14343816954976	2.97488976375032
ENSG00000036530.9_CYP46A1	NA	5.49501216002459	5.90644228634126	5.39334965148107	5.95010334858076	5.00601257075044	5.70137572995866
ENSG00000036549.13_AC118549.1	NA	13.7503460523103	13.85719464939	13.7868310831749	13.8612688316238	13.7061028876775	14.0439403011942
ENSG00000036672.16_USP2	NA	8.07654916842948	8.37680252179949	8.31694732943112	8.55921166092298	9.08425297616329	8.85892507337297
ENSG00000036828.16_CASR	NA	-1	-1	-1	1.29089905871014	1.20641608165016	-1
ENSG00000037042.9_TUBG2	NA	10.6274368460904	10.5762874885353	10.3031412200882	10.5465531758954	10.5119172646528	10.6668041250646
ENSG00000037241.7_RPL26L1	NA	13.0152622972997	12.2300848484161	14.0662136832809	12.3324802928973	13.6186190277307	12.5104814590788
ENSG00000037280.16_FLT4	NA	11.0364159890722	10.1655228485826	10.9144229070476	10.1626363798261	11.2461823155041	10.955264521688
ENSG00000037474.15_NSUN2	NA	13.7258207396371	13.6418095221819	13.2534617613225	13.9369127161465	13.5829343499317	13.9140765723361
ENSG00000037637.11_FBXO42	NA	12.1562183405815	12.4896366860781	11.6996156184053	12.4901760964043	11.91296003795	12.4956153583784
ENSG00000037749.12_MFAP3	NA	13.1714763475722	13.447329870063	13.0937551621063	13.4060602249685	13.0790941638631	13.3527235846814
ENSG00000037757.14_MRI1	NA	11.8895694343918	11.6451974201916	11.9811245907322	11.8028745530101	12.035739405805	11.7849297594039
ENSG00000037897.17_METTL1	NA	11.8856779418274	11.1933320807877	12.0197440395236	11.3771212901258	12.2013255505582	11.7886872267149
ENSG00000037965.6_HOXC8	NA	6.84277807184557	6.25995296490819	6.83846587081992	6.6686560316446	7.04938545659049	7.3682789756762
ENSG00000038002.9_AGA	NA	9.88907982487551	10.0935202162527	10.5618180482328	10.1638610643726	10.2555743476673	9.82046792742771
ENSG00000038210.14_PI4K2B	NA	12.3045594029203	12.6562945759586	11.8966149514014	12.529898969344	11.7529151245331	12.6225145323402
ENSG00000038219.13_BOD1L1	NA	11.9078248053568	12.563795119396	11.3798186662101	12.6187647485158	11.5386575172159	12.4729082117053
ENSG00000038274.17_MAT2B	NA	14.1560998081228	14.2580116510578	15.3248432654098	14.3191765920481	14.7323737580569	14.2021275109655
ENSG00000038295.8_TLL1	NA	2.80817268973273	2.93315015163294	2.78434487607049	2.13540673558656	2.77119432927765	2.06384183801434
ENSG00000038358.15_EDC4	NA	13.5373186523823	13.4487120679044	12.8061011509371	13.5673415670355	13.310273415383	13.5106471708376
ENSG00000038382.20_TRIO	NA	11.5317396598563	11.8464290945749	10.9160139954621	12.0364248700762	11.421373115229	12.1168653177754
ENSG00000038427.16_VCAN	NA	5.40296868726185	4.80019713187699	4.76138283769982	4.84441933777963	5.33156213999963	6.1000981282427
ENSG00000038532.16_CLEC16A	NA	11.9480739071733	11.9921535643001	11.0632808662672	12.0808644372736	11.4896202473841	12.0823808705853
ENSG00000038945.15_MSR1	NA	0.515145658870156	0.756704934741344	0.646045912731413	1.29089905871014	0.489356241498477	0.506140336067499
ENSG00000039068.19_CDH1	NA	15.2720752870436	15.5231181531945	14.783105013935	15.405428071746	14.9629784164074	15.403240449638
ENSG00000039123.16_MTREX	NA	13.3827518328746	12.955800671871	13.0767851397148	13.0935298904842	13.239367646633	13.2175095824199
ENSG00000039139.9_DNAH5	NA	8.07157500708253	8.58330826570244	8.30728000832305	8.47488981826644	8.45235529955497	8.95300932547581
ENSG00000039319.17_ZFYVE16	NA	12.9846631230544	13.2726033620314	13.076073705091	13.2746310308821	12.9231437690816	13.302621131298
ENSG00000039523.20_RIPOR1	NA	11.6187087059664	11.9532970145136	11.2646522273698	11.9612892072724	11.6175466679531	12.015332906215
ENSG00000039537.13_C6	NA	0.515145658870156	-1	-1	-1	1.20641608165016	-1
ENSG00000039560.14_RAI14	NA	13.5342711899837	13.8645774721244	13.4441691394132	13.8830899322299	13.4142647490729	13.7068917309568
ENSG00000039600.11_SOX30	NA	3.29151283071405	3.88513758306847	4.21745153885783	4.2475209474086	2.04098824485641	2.35084444806025
ENSG00000039650.12_PNKP	NA	12.1411625720685	12.1268039974164	12.298144536795	12.0410975558807	12.4377876656938	12.180312639138
ENSG00000039987.6_BEST2	NA	4.02638871617658	4.67141626018303	2.54210121923842	4.38828951939807	4.28393546044417	4.09291939637801
ENSG00000040199.18_PHLPP2	NA	10.8651771262556	11.1584669158828	9.90361248828388	11.1672152532576	10.1967941278534	11.1704225592496
ENSG00000040275.17_SPDL1	NA	13.0147764889443	12.9009824457436	13.1467216500764	12.9802669961806	12.9844425098021	12.8495749581726
ENSG00000040341.18_STAU2	NA	12.8112513925865	13.1698235612419	12.8201899366988	13.1587110586845	12.7875285644801	13.0096221969234
ENSG00000040487.13_SLC66A1	NA	11.1013081427835	11.3566930986607	10.6195945448837	11.4946880264508	10.8438917376954	11.2051393796768
ENSG00000040531.14_CTNS	NA	11.7923923024399	11.421323572507	11.5590358509883	11.5121020798108	11.7304502177001	11.734781203662
ENSG00000040608.14_RTN4R	NA	10.9208610215381	10.5717840599174	10.7670529067125	10.7477974879799	10.9965648738287	10.7346033006681
ENSG00000040633.13_PHF23	NA	13.2906422211554	13.234646705435	13.2691085695051	13.3536288067901	13.2558579862487	13.0235605468255
ENSG00000040731.10_CDH10	NA	0.515145658870156	-1	1.39492385926443	0.559151537014313	-1	1.7051978671648
ENSG00000040933.15_INPP4A	NA	11.5828880436859	11.7525557572831	11.0039225162993	11.8028745530101	11.2637890427311	11.8518294275218
ENSG00000041353.10_RAB27B	NA	11.441119365515	11.1734062631877	11.4391165570399	10.5981983303531	10.8995594304091	10.8755351762828
ENSG00000041357.16_PSMA4	NA	15.2236755450421	14.8951217926593	15.8678208006062	15.0364417675952	15.4658659251282	14.9328091666615
ENSG00000041515.16_MYO16	NA	2.98788607713756	2.02463226269727	2.99170115686585	2.87062454522425	3.11009006852155	2.79529286833288
ENSG00000041802.11_LSG1	NA	13.3493617889427	13.506042729292	12.9787533705065	13.6323744266829	13.2327454612684	13.5712391533947
ENSG00000041880.14_PARP3	NA	10.8709148129297	11.1242767946273	10.6273851798355	11.0699683380605	10.7763569891464	11.0453389920223
ENSG00000041982.16_TNC	NA	12.8850511145672	14.2663095906396	11.6006891640704	14.2033530419477	11.9686777548491	13.8478162082831
ENSG00000041988.15_THAP3	NA	11.4054898891503	11.6754212473657	11.5071994566965	11.7802949298751	11.482802319496	11.4535217209144
ENSG00000042062.13_RIPOR3	NA	2.80817268973273	3.99685448657254	4.44608860764274	3.91657568080638	3.8132450374244	3.6396016535685
ENSG00000042088.14_TDP1	NA	12.3468599597998	12.0811911858792	12.2840438399505	12.1694992517615	12.3841581878612	12.2214825767652
ENSG00000042286.15_AIFM2	NA	12.6672155610453	12.8465641798688	12.0428660027364	12.8279068935731	12.2961548525906	12.7522929415315
ENSG00000042304.11_C2orf83	NA	-1	-1	0.646045912731413	-1	1.20641608165016	0.506140336067499
ENSG00000042317.17_SPATA7	NA	10.1857556184213	9.78271013557783	11.1724778764681	9.63973248684196	10.5331917202209	9.74046901322588
ENSG00000042429.12_MED17	NA	12.0502186215815	12.0859363508206	11.9229665004954	12.1208262951132	12.0468762529816	12.180312639138
ENSG00000042445.14_RETSAT	NA	13.6292610599012	13.9305854971491	13.3562192070801	13.8968731463766	13.4741587668793	13.8436680795305
ENSG00000042493.16_CAPG	NA	9.92812906436035	8.20714875484136	10.0176738995803	8.17306306596628	9.81924426996882	8.37411955691032
ENSG00000042753.11_AP2S1	NA	14.1127207499584	13.8638869352135	14.248223781804	13.8377704318838	14.1975370490337	13.961203209837
ENSG00000042781.13_USH2A	NA	1.71695370984036	4.60244163498288	3.94562896621183	4.2475209474086	3.50408896330302	2.97488976375032
ENSG00000042832.12_TG	NA	5.95007492963166	7.31034387381254	5.31832821128262	7.07499276817539	5.51383546840781	6.1000981282427
ENSG00000042980.13_ADAM28	NA	1.71695370984036	3.76403810905452	2.54210121923842	3.48638317684589	2.56630615203523	2.06384183801434
ENSG00000043039.7_BARX2	NA	5.00408364092563	4.97408442595249	4.92202912039724	5.07020395390465	5.54209502762952	4.71517261794909
ENSG00000043093.15_DCUN1D1	NA	13.4538847794937	14.1659613331586	13.865723105038	14.186429750912	13.5241582245338	14.1418582697391
ENSG00000043143.20_JADE2	NA	11.9911871492881	12.0819831313361	11.380971222768	11.8553628372157	11.5886251825694	11.8654144177228
ENSG00000043355.12_ZIC2	NA	12.8526156947847	13.1097375997666	12.5971058817134	13.3498674182117	13.0503307815579	13.2511244841969
ENSG00000043514.17_TRIT1	NA	12.1447192672163	11.9837029399527	12.8114540123872	12.0206263778398	12.6259146285466	12.0483062908377
ENSG00000043591.6_ADRB1	NA	7.17508996570617	6.85666001343518	6.6059013543748	7.18524180613909	6.93682016490651	7.21586810451176
ENSG00000044090.8_CUL7	NA	12.7791924387005	12.1631819255604	12.1355778221973	12.0390968291274	12.5005628921112	12.6223039827313
ENSG00000044115.21_CTNNA1	NA	16.1071748392944	16.0287514537376	15.5936836120428	16.017142934984	15.7369519931943	16.0358090934383
ENSG00000044446.12_PHKA2	NA	11.3004564849516	11.3890502884855	10.9629485394981	11.5048717516696	11.1094598054689	11.4141714390908
ENSG00000044459.15_CNTLN	NA	11.6648515241274	12.222922249199	11.4380095461273	12.1894801817223	11.3896489701473	12.0476792424937
ENSG00000044524.11_EPHA3	NA	11.3009878568832	10.9400011255096	11.4512379421212	11.0214757087449	11.3745039816128	11.5277934539263
ENSG00000044574.8_HSPA5	NA	16.6186729779451	16.5383917486656	16.2005629054246	16.6850026901123	16.413265975013	16.8865761476626
ENSG00000046604.13_DSG2	NA	15.318543086012	15.52264426499	15.2206276988584	15.6041615849845	15.2853591885072	15.7125244458818
ENSG00000046647.13_GEMIN8	NA	10.4803719260438	10.4321839363846	11.1830885627076	10.4128486380759	10.9002418612306	10.3163268183551
ENSG00000046651.15_OFD1	NA	10.8651771262556	10.8255005849029	10.5929861563601	10.6852074106108	10.5610782771028	10.8097510357546
ENSG00000046653.15_GPM6B	NA	10.7217353674287	10.2038624850475	10.9080409476633	10.3048643823078	10.9708081391932	10.7806128914937
ENSG00000046774.10_MAGEC2	NA	6.97652044298729	5.02768193354761	6.99118089070726	5.3366225971988	6.79136915835971	4.81287631202895
ENSG00000046889.19_PREX2	NA	6.94422914112465	6.97051838546277	6.7697331737744	7.56483597617654	7.50194595006158	7.54928286037133
ENSG00000047056.16_WDR37	NA	11.4275570887108	11.5568106463221	10.9255238514648	11.5934281678175	11.196486787268	11.6706604867785
ENSG00000047188.16_YTHDC2	NA	13.0827919640709	13.4632217376668	12.9055586035178	13.5274613179835	13.0454035150004	13.4628846345679
ENSG00000047230.15_CTPS2	NA	11.7183427533171	11.4055935301961	11.647891639727	11.3326201475772	11.5886251825694	11.5069602339193
ENSG00000047249.18_ATP6V1H	NA	12.9732065637186	13.173171996451	13.1778910170386	13.1878988251011	12.9937445060569	12.9395269897534
ENSG00000047315.16_POLR2B	NA	14.5665862612972	14.6239470260663	14.2617389787465	14.7419306729839	14.361562000294	14.7058715266607
ENSG00000047346.12_FAM214A	NA	11.1098248893408	11.8986065157007	10.6882405514914	11.8297432353384	10.7379341423309	11.852547625162
ENSG00000047365.12_ARAP2	NA	11.111643383606	11.3282734202854	10.3685150219334	11.5058378916294	10.6400092981483	11.7277523073245
ENSG00000047410.14_TPR	NA	14.5061162288997	14.6022369392656	13.5454270607553	14.6001953612759	13.986729203924	14.6503180518369
ENSG00000047457.14_CP	NA	7.28231114082176	7.15041378120269	7.05033078730267	7.33191479383355	6.76763095173466	7.13316602122164
ENSG00000047578.13_KIAA0556	NA	11.5976692691864	12.0184540275177	11.0661498045992	12.0162258640078	11.5004623538659	12.0476792424937
ENSG00000047579.19_DTNBP1	NA	11.3288741276513	10.632506921965	11.1503437321496	10.624233760309	11.2299875749966	10.9083720630909
ENSG00000047597.7_XK	NA	9.86628206522498	9.52761157733844	9.84968709551043	9.61845115474175	10.0222167018863	10.4646242120889
ENSG00000047617.15_ANO2	NA	7.61190319936696	7.07604456035661	7.33356575912193	6.49270282572522	6.99930535349848	7.00466009205321
ENSG00000047621.12_C12orf4	NA	12.5786128617038	13.8027487349288	13.1940466570528	13.9825666527948	12.9238151371865	13.0075278420301
ENSG00000047634.15_SCML1	NA	10.3570178384039	11.6159681849195	10.8317017734413	11.9154913531197	10.5909743947002	11.461076244245
ENSG00000047644.18_WWC3	NA	12.4472438979101	12.4908298785914	11.5625955897411	12.3987338963802	11.8745823320119	12.418168864159
ENSG00000047648.23_ARHGAP6	NA	7.75528895665168	7.57622239960729	6.6059013543748	7.6441987907997	6.8490600924717	7.17050896080108
ENSG00000047662.5_FAM184B	NA	5.58153381889173	6.19115314438693	4.21745153885783	5.88029728737159	6.01504926847251	5.82362138047254
ENSG00000047849.21_MAP4	NA	14.4552258329023	14.6966507039035	13.9398396166756	14.8578434056031	14.4339835461195	15.0332287750463
ENSG00000047932.14_GOPC	NA	12.6756403357933	12.7601410898192	12.1716557640009	12.7394962910901	12.2886165011902	12.838923108278
ENSG00000047936.10_ROS1	NA	-1	0.756704934741344	1.88542602307657	0.559151537014313	-1	0.506140336067499
ENSG00000048028.11_USP28	NA	12.4675033264768	12.6829000989063	12.3651967583688	12.729192038834	12.4879067055362	12.7721673432597
ENSG00000048052.21_HDAC9	NA	15.0032875677739	15.2816687812714	14.9251267286151	15.1879537165768	14.6370288822311	15.1409934555123
ENSG00000048140.18_TSPAN17	NA	13.7029837179979	13.5530656455476	13.8557057617066	13.440953427369	13.8449668155458	13.5299692026603
ENSG00000048162.20_NOP16	NA	12.691736011072	12.3640629473081	12.5956174084346	12.5903541739254	12.9680996556364	12.8125902972698
ENSG00000048342.16_CC2D2A	NA	11.425609170817	11.0082497603661	11.6208294673723	10.8410848350984	11.4621530553608	11.3170849951866
ENSG00000048392.11_RRM2B	NA	13.2083416681626	14.415370890388	13.7501727271991	14.3286263629549	13.3192314586422	14.0370857106397
ENSG00000048405.10_ZNF800	NA	11.2485113488866	11.4250733987928	10.7802165178566	11.6288911928625	10.9339582628242	11.5988561594387
ENSG00000048462.11_TNFRSF17	NA	-1	0.756704934741344	-1	1.29089905871014	0.489356241498477	-1
ENSG00000048471.14_SNX29	NA	10.9624334833634	11.3249321767807	10.1123136399392	11.202205818209	10.4775776638436	11.1692700366641
ENSG00000048540.15_LMO3	NA	9.82992329655552	9.33377685761526	9.94783796346723	8.44296286069292	8.86966809355413	8.32941821041278
ENSG00000048544.6_MRPS10	NA	13.082637450935	12.6870701773242	13.8898086050761	12.6921119498701	13.4970085461897	12.9118855080685
ENSG00000048545.14_GUCA1A	NA	-1	0.756704934741344	-1	0.559151537014313	-1	0.506140336067499
ENSG00000048649.13_RSF1	NA	12.9599769406875	13.2758948461812	12.1491707188136	13.238615638647	12.4604065572375	13.2322090931943
ENSG00000048707.15_VPS13D	NA	11.9625886138983	11.8764102141327	11.0747225466453	11.6930694646488	11.5399718249869	12.4352893401905
ENSG00000048740.18_CELF2	NA	8.86418103554724	8.77962883114507	8.57235837552919	8.71437072337866	8.64381182496058	9.44527530775133
ENSG00000048828.17_FAM120A	NA	15.0409929742138	15.3319272019531	14.3986275744619	15.4281251372036	14.782741205132	15.4757428222823
ENSG00000048991.16_R3HDM1	NA	13.1203081152872	13.1789205907448	12.5162831972064	13.245717517563	12.8232309518472	13.415189051902
ENSG00000049089.15_COL9A2	NA	14.3189543161854	13.7003571711855	13.6655674031119	13.5393056718777	13.9837542511772	13.4916392723144
ENSG00000049130.16_KITLG	NA	11.4329003411809	11.019868262369	10.8805981804795	11.1307287355556	10.9551304450428	11.2934771033678
ENSG00000049167.14_ERCC8	NA	11.1598957996258	11.3006440383996	11.4285654987852	11.2531501423176	11.2690822678084	11.3586294577478
ENSG00000049192.15_ADAMTS6	NA	5.00408364092563	6.4087717801668	5.19793198884244	6.37919132294033	5.51383546840781	5.82362138047254
ENSG00000049239.12_H6PD	NA	10.316595966323	10.8498833650354	9.80229643629874	10.5981983303531	10.0096227499713	10.6093233888092
ENSG00000049245.13_VAMP3	NA	13.6088053269017	13.5654354320227	13.5179252446071	13.5335140879997	13.4709467995652	13.5885865577476
ENSG00000049246.14_PER3	NA	9.22160371655019	9.65441690579421	9.09481675690324	9.49543776019862	9.43068959829884	9.64917367315127
ENSG00000049249.8_TNFRSF9	NA	3.42230333690735	7.06326825288278	3.17296538656624	7.97520501344989	2.56630615203523	8.34990885967254
ENSG00000049283.18_EPN3	NA	12.212660240843	11.6601233433621	11.4168133182694	11.5212087815969	11.3596945912657	10.9784803423971
ENSG00000049323.16_LTBP1	NA	12.9072075291068	13.112647073393	12.3464391444149	13.0207085630289	12.6045088123048	12.9556606571983
ENSG00000049449.9_RCN1	NA	15.1141751508486	15.5192495941251	14.8930704791773	15.5682800453876	14.9297740983848	15.7611698405685
ENSG00000049540.17_ELN	NA	7.63231536421336	9.04304050433989	8.09893982357133	9.6693535889926	9.18402033734966	10.5325264047238
ENSG00000049541.11_RFC2	NA	13.2816513795843	13.0181602189306	13.0808690944838	13.0634963796158	13.0815030339747	13.0533842130728
ENSG00000049618.23_ARID1B	NA	13.1916753410061	13.4639813770849	12.4750527018194	13.480439081912	12.8280806212621	13.4961275426944
ENSG00000049656.14_CLPTM1L	NA	13.9397710163895	13.7209675966205	13.6252850271655	13.8588132624726	13.8035259471105	13.8537471154925
ENSG00000049759.18_NEDD4L	NA	11.9001295519423	12.2795966303549	11.5967263526391	12.2616077678225	11.6100576497643	12.1269925798719
ENSG00000049768.15_FOXP3	NA	5.83737421801349	6.28217596099559	5.429446397267	6.44514428390309	5.62369685858435	6.08061336294541
ENSG00000049769.14_PPP1R3F	NA	8.20020094931872	9.43394712885723	7.87511740629545	9.62913106080595	7.6456141229822	8.46333647590908
ENSG00000049860.14_HEXB	NA	14.1295712189939	13.6260133154586	14.4630347685686	13.6690619928176	14.1439473326162	13.6448113126111
ENSG00000049883.15_PTCD2	NA	10.6609399621833	11.0781858793311	11.0173259257439	11.0945804165807	10.8817019679924	11.0428239897814
ENSG00000050030.15_NEXMIF	NA	9.64808152662331	9.95340992656531	8.52726658331125	9.77250492656086	8.76864893227164	9.82925109980503
ENSG00000050130.18_JKAMP	NA	12.9821802942021	13.2197917333113	13.910309100673	13.2901356735566	13.470257589506	13.2340015963262
ENSG00000050165.18_DKK3	NA	10.5809369933416	10.5398601928608	10.5890021003107	10.385813827731	10.5375846843103	10.3069250124829
ENSG00000050327.15_ARHGEF5	NA	12.9737065713548	12.9631268343228	12.2042513545049	13.0448391861215	12.6076459922434	12.9006441792521
ENSG00000050344.9_NFE2L3	NA	10.2793297574834	10.4007902886051	10.4299412514157	10.6401605047914	10.6810926221016	10.9751865818454
ENSG00000050393.11_MCUR1	NA	13.1537878672565	13.4668643645348	13.2043376994486	13.5861908078144	13.1485177163497	13.4155536129993
ENSG00000050405.13_LIMA1	NA	14.5921566907796	14.2350543723507	14.4707687914752	14.1135922926835	14.3559762990327	14.2428251736398
ENSG00000050426.16_LETMD1	NA	12.6711258425641	13.3735671880722	12.9611370549555	13.2565204814264	12.8067646533678	13.0335704277106
ENSG00000050438.17_SLC4A8	NA	9.90873655817247	11.3729624062463	9.32781901460031	10.9579444696556	9.12452434795021	9.45854516512182
ENSG00000050555.18_LAMC3	NA	9.04253897004242	10.0127591361963	8.44148645316956	10.2120150078186	9.1974086126734	9.78779759131582
ENSG00000050628.20_PTGER3	NA	8.6169031862279	9.36794559253091	8.63552864291561	9.49543776019862	9.40591525456392	10.6536777610691
ENSG00000050730.16_TNIP3	NA	1.23773309057468	3.14198696342875	-1	0.559151537014313	2.04098824485641	1.7051978671648
ENSG00000050748.17_MAPK9	NA	13.631903351868	13.9355232621138	13.6311089734592	14.0513459257083	13.6137384064178	13.9528550025116
ENSG00000050767.17_COL23A1	NA	5.46497878749973	5.39701401244114	5.46466199144988	5.97264110587286	5.70092916719992	5.64942166577552
ENSG00000050820.17_BCAR1	NA	12.4970210322225	12.2272240745623	11.8974205955999	12.5218026336977	12.2678789161815	12.2566348710441
ENSG00000051009.10_FAM160A2	NA	11.5052384232155	11.8990559645711	11.2646522273698	11.8557417943661	11.5724463054131	11.9726970032625
ENSG00000051108.15_HERPUD1	NA	12.6558362114541	13.7420394904847	13.1563453148397	13.8838333253847	12.9648413709869	13.8931117640219
ENSG00000051128.19_HOMER3	NA	9.87772597643446	9.86966624837692	10.1520119371662	9.85518885742263	10.3564922146374	9.99454015278571
ENSG00000051180.17_RAD51	NA	11.8973210699187	11.2042842075227	11.9465118128822	11.3084604005943	11.7920497630268	11.2924188439314
ENSG00000051341.14_POLQ	NA	11.7999308207949	10.7823006043749	11.1119877628226	10.7801007464636	11.3930469140084	11.728926170762
ENSG00000051382.8_PIK3CB	NA	12.4958611300899	12.6442807696107	11.9750315880765	12.6703027763166	12.2101585966754	12.8849332280678
ENSG00000051523.11_CYBA	NA	14.1408943976856	13.0021414826478	14.7670505324238	13.4218858785143	14.5685945885656	13.2762329719449
ENSG00000051596.9_THOC3	NA	14.4707177457276	14.2645666178381	14.6729691016098	14.5203965697911	14.6401472786675	14.263359158972
ENSG00000051620.11_HEBP2	NA	12.9943876699375	12.7419668742476	13.3371952945326	12.8813706383912	13.1044850367404	12.5780450353661
ENSG00000051825.15_MPHOSPH9	NA	12.5399701353762	12.7606358055567	12.2660659813653	12.7401122120768	12.3465971645831	12.7706482257124
ENSG00000052126.14_PLEKHA5	NA	11.8348435819382	12.0748399232207	11.5145696442533	12.0960202449292	11.5711612647261	12.0166151470726
ENSG00000052344.16_PRSS8	NA	13.7720679265159	14.7071475643988	13.70728464924	14.6419904747077	13.7502055944682	14.4218857010027
ENSG00000052723.11_SIKE1	NA	13.7889288895963	14.4721283574648	13.8030443836131	14.4579941259961	13.6685423023884	14.3087481332872
ENSG00000052749.13_RRP12	NA	12.5737837804734	12.9263387225093	11.8611267188754	13.2120748515369	12.6232303723398	13.211783510184
ENSG00000052795.13_FNIP2	NA	11.207720412213	11.4418280393323	10.6205706780566	11.5005160972842	10.8796271954742	11.5725071468781
ENSG00000052802.13_MSMO1	NA	14.9435391350789	15.1585934049772	15.8311865367573	15.1796909684018	15.4204725583804	15.3244761499108
ENSG00000052841.15_TTC17	NA	13.4466991565002	13.7721614967689	12.8953109616525	13.8166108023229	12.9855683521537	13.6857885651395
ENSG00000052850.8_ALX4	NA	8.09627606699805	6.79617366546092	7.79437466212511	6.69600297817118	8.2052789863719	8.22235801205307
ENSG00000053108.17_FSTL4	NA	6.13309867027223	6.82673380962015	4.64339949666533	6.74918921868638	5.33156213999963	6.19375981603391
ENSG00000053254.15_FOXN3	NA	11.6511629756707	12.0596426592648	11.1057271714796	11.9542284310711	11.4041555711255	11.9710444478484
ENSG00000053328.8_METTL24	NA	7.21172293903251	6.32562063280382	7.67916820312613	6.53874350045886	7.84592815317299	6.86357839465356
ENSG00000053371.12_AKR7A2	NA	13.1943949669796	12.8842813184291	13.4330996044124	12.9314863138881	13.3795708584461	12.9305419492169
ENSG00000053372.5_MRTO4	NA	13.3533379111827	12.5475461998804	13.5037106975221	12.6241134235087	13.6909986175118	13.2126228928861
ENSG00000053438.11_NNAT	NA	4.18218615561834	4.60244163498288	4.58058051926203	4.93901380891317	4.21539643595068	4.5549655978151
ENSG00000053501.13_USE1	NA	11.0884380042936	11.0829409230332	11.3878672926793	11.1450622401169	11.4166110389376	11.0509817679462
ENSG00000053524.12_MCF2L2	NA	6.80731126329677	5.65719240652507	6.52480197253168	5.72965423318434	6.64270179924245	6.2471704948894
ENSG00000053702.15_NRIP2	NA	7.00810477571165	7.81595663563929	6.87818668220498	7.91828965289644	7.02956153439276	7.56338947056765
ENSG00000053747.16_LAMA3	NA	12.7269618692389	12.4358248622473	11.06829777053	12.2376729071574	10.8101564334404	12.1711299441102
ENSG00000053770.12_AP5M1	NA	12.776902306179	13.3370472012301	12.548952500459	13.2870480466457	12.5215607415432	13.2823757780683
ENSG00000053900.10_ANAPC4	NA	11.9179062371642	12.1631819255604	11.9700620052855	12.2268738340814	11.9082182850557	12.0338147738797
ENSG00000053918.17_KCNQ1	NA	9.1736645465569	9.02008389520309	9.0287016036326	9.12981466306853	9.34906668831911	9.30329767456818
ENSG00000054116.12_TRAPPC3	NA	13.2264969138957	13.039313519615	13.7293971509764	13.0298049102789	13.4095989469853	13.0060761209259
ENSG00000054118.15_THRAP3	NA	15.1534342889469	15.1473820670428	14.3769125324003	15.1109154869706	14.6421374809816	15.2596228385927
ENSG00000054148.17_PHPT1	NA	13.2540633082098	13.0173324420826	14.1448172169373	13.0035395181037	13.8245299974336	13.0758540343366
ENSG00000054179.12_ENTPD2	NA	9.00389567385561	9.40385961200887	9.04914625352686	9.16448973455643	9.13847357512842	8.91225584407062
ENSG00000054219.11_LY75	NA	3.42230333690735	2.39465370156298	2.25080803793905	2.66457719062308	2.95057042569612	1.22681122250844
ENSG00000054267.22_ARID4B	NA	12.1847152919523	12.6795030123376	11.4670620940316	12.6795370681288	11.7123007007066	12.522490687646
ENSG00000054277.14_OPN3	NA	9.54777452508019	10.1060325521971	9.56127880741921	10.3453671661786	9.6065743583618	9.75437024817442
ENSG00000054282.16_SDCCAG8	NA	10.3923540898396	9.8400114032975	10.1985129632928	9.81209779018929	10.1459122321968	10.1262889504317
ENSG00000054356.14_PTPRN	NA	1.23773309057468	1.52569523028648	1.39492385926443	0.559151537014313	1.20641608165016	1.22681122250844
ENSG00000054392.13_HHAT	NA	9.47806006800773	9.98423717372775	9.18467914424269	9.6432490541381	9.04529525395099	9.49580002608814
ENSG00000054523.17_KIF1B	NA	13.4263869003874	13.9239754111877	12.5859047181251	13.9868114018046	12.9947033672637	13.8604573190494
ENSG00000054598.9_FOXC1	NA	9.30237615105677	9.08156428525302	8.79966067507798	9.16448973455643	8.88353884880153	9.25196170753572
ENSG00000054611.14_TBC1D22A	NA	10.9631051171881	10.9144413896244	10.680772538823	10.9838323431456	10.6715306805999	10.8008479708877
ENSG00000054654.16_SYNE2	NA	13.3654549983108	13.9904398834134	12.4914197912603	13.8593803033562	12.7684063476181	13.7446196131545
ENSG00000054690.14_PLEKHH1	NA	10.8109929517478	11.0468901022239	10.5557069509253	11.093938080744	11.023749920213	11.405877383008
ENSG00000054793.14_ATP9A	NA	14.2797967246399	14.7771566836181	13.545170044061	14.6591353830254	13.742900579225	14.6443684747365
ENSG00000054938.15_CHRDL2	NA	3.29151283071405	2.39465370156298	0.646045912731413	2.66457719062308	2.56630615203523	2.06384183801434
ENSG00000054965.10_FAM168A	NA	13.5683274644135	13.6063313603957	12.8129492613857	13.4058014575092	13.0930397975294	13.5793967274946
ENSG00000054967.13_RELT	NA	10.3529237426846	10.2140129533295	9.88423566571036	10.5716844067022	10.4702429355836	10.5476842443226
ENSG00000054983.17_GALC	NA	12.1711186105148	12.0992968429325	12.2303833512216	11.9626972251777	12.0141504518435	12.0526880147176
ENSG00000055044.11_NOP58	NA	13.7664035290474	13.6428833135427	13.6707601560675	13.874606764028	13.795936673393	14.0389010129897
ENSG00000055070.17_SZRD1	NA	14.868807430819	15.0092230513938	14.5159941413115	15.1239918348746	14.6898370369607	15.0315648829553
ENSG00000055118.15_KCNH2	NA	9.20125309799667	9.76506635376325	8.75768530454118	9.72517318199764	9.18849691485902	9.22780802492724
ENSG00000055130.17_CUL1	NA	13.5228140011141	12.9440879914802	13.3230232789503	12.8765234405976	13.3942997508262	13.2571037064983
ENSG00000055147.19_FAM114A2	NA	11.7455341949347	11.6601233433621	12.3087817559231	11.6006812927762	11.9637895266537	11.7644685771525
ENSG00000055163.20_CYFIP2	NA	13.2459451467941	13.5454777108256	12.600820360037	13.5110750535533	12.945796814331	13.4611198040479
ENSG00000055208.19_TAB2	NA	13.3936292614521	13.6761739162609	13.1727426631131	13.7383136364564	13.2605161156256	13.6830657453661
ENSG00000055211.14_GINM1	NA	12.517055465045	12.8169014005512	13.1958488035902	12.8813706383912	12.7100541689537	12.6138567016868
ENSG00000055332.18_EIF2AK2	NA	14.0780301438068	14.641512726248	13.6731143337634	14.6381404276176	13.7148573957377	14.5554712981541
ENSG00000055483.19_USP36	NA	12.3683148236987	12.5921451480966	11.5857721586595	12.8390660023416	12.1854564648598	12.7407011550123
ENSG00000055609.18_KMT2C	NA	12.8825681542285	13.4168954794867	12.0193740199494	13.5481255565018	12.7026402616281	13.8876912287451
ENSG00000055732.13_MCOLN3	NA	11.4079585348819	11.5075556602582	11.9719754096742	11.4750893097404	11.6434562608417	11.6641297534149
ENSG00000055813.6_CCDC85A	NA	7.04916957185798	6.71681521638005	6.28975619807278	7.07499276817539	6.90453249481452	6.89738166279984
ENSG00000055917.15_PUM2	NA	13.94598475548	14.4320826564941	13.4365679666628	14.5263599728305	13.6726422759333	14.4341724663942
ENSG00000055950.16_MRPL43	NA	13.2406922102914	12.6912282369534	13.900396707526	12.6821035657928	13.6510115860125	12.6760376708109
ENSG00000055955.17_ITIH4	NA	6.53114287109712	7.6205019735671	7.01513264125513	7.62298372574325	7.20772096489109	7.26848117253722
ENSG00000055957.11_ITIH1	NA	0.515145658870156	0.756704934741344	-1	2.13540673558656	0.489356241498477	1.7051978671648
ENSG00000056050.7_HPF1	NA	11.3194636388088	11.0165582270919	11.5717090744552	10.9344567207518	11.2832777215464	10.9659238445969
ENSG00000056097.16_ZFR	NA	13.9159463651621	14.0636313354868	13.5082007710042	14.1011003245658	13.6479674006558	14.1438398888243
ENSG00000056277.16_ZNF280C	NA	11.4343541638381	11.781608385069	11.1877063105666	11.8118864950836	11.2838008061091	11.7698012563569
ENSG00000056291.17_NPFFR2	NA	5.08529646069359	5.02768193354761	5.19793198884244	5.40450483204493	5.33156213999963	5.22148350123634
ENSG00000056487.16_PHF21B	NA	8.25826705783972	9.82873177681035	8.17000418812502	9.91750429268804	8.59068661844941	9.22559205058144
ENSG00000056558.11_TRAF1	NA	6.80731126329677	8.01485233203751	6.99118089070726	7.93560125506146	7.19887293561261	7.55635340712944
ENSG00000056586.16_RC3H2	NA	13.4295492293924	14.6610549419503	13.0179912423591	14.7831569252181	13.2503821228599	14.5762184028638
ENSG00000056736.10_IL17RB	NA	10.3467607320792	9.72709431141652	10.8467957620408	9.71852107882129	10.7584030495347	10.1935897706209
ENSG00000056972.20_TRAF3IP2	NA	10.9724753070564	10.6886986793729	10.7159062723328	10.6251232072478	10.8079760959422	10.7118281029806
ENSG00000056998.20_GYG2	NA	11.1756278481662	11.6785661790006	10.8325444841606	11.548188980214	11.0492020185677	11.4760676412551
ENSG00000057019.16_DCBLD2	NA	13.306871074794	13.4943410387687	13.0250121469645	13.5965445673373	13.1586775289503	13.5888020857213
ENSG00000057252.13_SOAT1	NA	13.0218853348099	13.4115500739905	12.990882552239	13.4174002868091	12.9229758782275	13.2984102413804
ENSG00000057294.14_PKP2	NA	13.3768412212658	13.3945973508663	13.135497662942	13.5034768347053	13.2340993986178	13.4566392138423
ENSG00000057468.7_MSH4	NA	7.24744871442837	8.21871720193721	7.73070651510177	8.36843411630378	7.55837641075588	7.77819825816502
ENSG00000057593.13_F7	NA	1.23773309057468	0.756704934741344	-1	0.559151537014313	0.489356241498477	-1
ENSG00000057608.17_GDI2	NA	15.7042242256697	15.3600716725897	16.3605111240053	15.4217406042098	16.1026540992674	15.5696940865126
ENSG00000057657.17_PRDM1	NA	6.32922953977086	6.30406182489276	5.88430571392619	6.32766940385231	5.56981165558017	6.06086183312615
ENSG00000057663.16_ATG5	NA	13.1062396277602	12.9810688545109	13.9221345608814	13.1179045877989	13.5007256577532	12.9082632633518
ENSG00000057704.13_TMCC3	NA	9.55135202680322	9.92367774061892	9.37485713955658	9.85063304007841	9.33298191614645	10.0152142412721
ENSG00000057757.10_PITHD1	NA	13.0491850108356	13.110708076401	12.6131333351961	13.3173557962408	12.7379991107911	12.9731026915796
ENSG00000057935.13_MTA3	NA	12.2283890684007	12.1672922554694	12.2993641960276	12.1464525820667	12.2330912705196	12.1075692674367
ENSG00000058056.9_USP13	NA	12.7148500535882	12.3113473603006	12.3552621501995	12.3116369423563	12.567824841468	12.8542441436426
ENSG00000058063.16_ATP11B	NA	13.3755805140301	14.0370262542141	12.7494444252105	14.1657186909496	12.9436467599229	14.0844741099305
ENSG00000058085.15_LAMC2	NA	13.1710404019103	12.7179673816451	12.5548369145724	12.8843454548344	12.7232268098983	13.0381549108063
ENSG00000058091.17_CDK14	NA	11.162237326159	11.7014218877522	10.9828220598023	11.6609035399048	10.9972029371254	11.5380983236387
ENSG00000058262.10_SEC61A1	NA	16.1804426807882	16.1964429644123	15.46885713881	16.2234695409779	15.763870159124	16.3656141239562
ENSG00000058272.19_PPP1R12A	NA	12.9488305641816	13.3094178883985	12.3619901005268	13.3683114753997	12.5106531943486	13.3444505298836
ENSG00000058335.15_RASGRF1	NA	5.99280043652845	6.11890735180118	5.15545866518147	5.64799149758076	5.7742362138589	5.95783217461331
ENSG00000058404.20_CAMK2B	NA	9.39488326137488	9.34964765953609	8.78928077107056	9.28869161760123	9.49534944224638	9.86385863768303
ENSG00000058453.17_CROCC	NA	11.1122490393435	11.2703922781932	10.5989416871113	11.4726206433348	11.1830899147743	10.8972772523995
ENSG00000058600.16_POLR3E	NA	12.2439482618626	12.1183365952918	11.7234360889602	12.2797961765854	12.1092965534795	12.3296374605807
ENSG00000058668.14_ATP2B4	NA	13.1794454271262	13.5218879414281	12.4392632996855	13.3882264711331	12.6631801033369	13.286766517055
ENSG00000058673.16_ZC3H11A	NA	14.4910017796822	15.0621059711264	14.0187809935084	15.1214333069012	14.2839398846281	15.0263229796052
ENSG00000058729.11_RIOK2	NA	12.3159087944139	10.2776141874275	12.1623016161265	10.1760510683434	12.1327148128736	11.4151440829617
ENSG00000058799.15_YIPF1	NA	12.2292268642382	12.106320270057	12.5533041624257	12.1126049120446	12.323887234292	12.0372934022002
ENSG00000058804.12_NDC1	NA	14.926292683736	14.5654764665805	15.027341412851	14.5164471773025	15.0375289318859	15.0951512949358
ENSG00000058866.15_DGKG	NA	6.65602363661048	7.89739432674224	6.97905422750891	8.16818931655075	7.48748657726463	7.90547023109503
ENSG00000059122.16_FLYWCH1	NA	11.8692897307975	12.4177458197291	11.4184980737903	12.5855642042419	11.7964554430179	12.3114690338036
ENSG00000059145.18_UNKL	NA	12.2658885700174	13.1297902957959	11.5071994566965	13.3022815071118	11.9247466813073	12.7977505701291
ENSG00000059377.17_TBXAS1	NA	4.77847218357551	2.02463226269727	5.19793198884244	1.77408377862989	5.54209502762952	4.09291939637801
ENSG00000059378.12_PARP12	NA	8.30139524973655	8.71166271342677	8.56831686546984	8.65986039989799	8.60749935099327	9.01334424829247
ENSG00000059573.9_ALDH18A1	NA	15.1731239619669	14.7415746748402	14.4656173856861	14.8802283073623	14.7559875959186	15.0497238522013
ENSG00000059588.10_TARBP1	NA	12.406098028982	12.4168045060494	12.2284637969488	12.559047624723	12.4438853333286	12.650660310984
ENSG00000059691.12_GATB	NA	11.1940537776128	11.4632613854302	11.1863884615486	11.3771212901258	11.1706991957781	11.2775211214405
ENSG00000059728.11_MXD1	NA	11.0535455275582	11.5811016754197	10.3754707462314	11.7141217758792	10.5261350354992	11.6196786577791
ENSG00000059758.8_CDK17	NA	11.1140644824918	11.452278297458	10.988882318084	11.6297777739225	11.0820534419087	11.8246356217153
ENSG00000059769.20_DNAJC25	NA	10.5535494581286	10.7427836176249	10.3486230428843	10.8818434838301	10.2001232893176	10.9166375344087
ENSG00000059804.16_SLC2A3	NA	3.42230333690735	2.68888213318037	3.47880794134591	3.82044798456638	3.11009006852155	2.35084444806025
ENSG00000059915.17_PSD	NA	8.57884775589755	7.98806309265413	8.63552864291561	7.82847144607969	8.66645278429065	7.8999223218269
ENSG00000060069.16_CTDP1	NA	11.4265834585222	11.3612670290451	10.7094982284989	11.5321563222092	11.2764603069018	11.3846829572983
ENSG00000060138.13_YBX3	NA	13.6152289550052	13.3772817632792	13.5347222007639	13.6353572537928	13.7123337676319	13.9850614917684
ENSG00000060140.9_STYK1	NA	11.3371877842361	11.6333606078314	11.1022372899964	11.5202528839233	11.0218698221687	11.3697095648426
ENSG00000060237.17_WNK1	NA	14.6819974487655	14.9957857166753	13.7697737056529	15.027765707778	14.22727935978	15.1672094100917
ENSG00000060303.5_RPS17P5	NA	3.29151283071405	-1	4.44608860764274	0.559151537014313	3.71737006492186	-1
ENSG00000060339.14_CCAR1	NA	13.5888171527314	14.0483149096703	13.347107235661	14.1176270283667	13.5238261392524	14.2164259333823
ENSG00000060491.16_OGFR	NA	11.7187405145198	11.752058262557	10.932615330177	11.8223943976317	11.412790027925	11.5273437420918
ENSG00000060558.4_GNA15	NA	4.10638949628379	2.68888213318037	3.17296538656624	2.13540673558656	3.50408896330302	1.7051978671648
ENSG00000060566.14_CREB3L3	NA	0.515145658870156	3.88513758306847	0.646045912731413	3.21110909091156	0.489356241498477	3.52893957787693
ENSG00000060642.10_PIGV	NA	10.5588910048395	10.9073100011775	10.7519874905772	10.8116965178826	10.548073541415	10.6161063965423
ENSG00000060656.20_PTPRU	NA	12.3771610303046	12.254877560875	11.742840972634	12.225114990784	12.0320079365527	12.1670940626323
ENSG00000060688.13_SNRNP40	NA	13.8002489838499	13.103900990578	14.0620879711315	13.2229848502846	13.9426903450601	13.3190830587703
ENSG00000060718.22_COL11A1	NA	-1	-1	-1	1.29089905871014	-1	0.506140336067499
ENSG00000060749.15_QSER1	NA	13.3338661990255	13.8523290584365	12.6570854892419	13.9219712485564	12.9969382348374	14.1084241540571
ENSG00000060762.19_MPC1	NA	12.0558966204308	11.927533296934	12.9262328689888	11.850807570109	12.5184527053795	12.0617223272677
ENSG00000060971.18_ACAA1	NA	12.0793173155124	11.8654126835138	11.9146340104264	11.9905727989322	11.9654207770328	11.8827451743087
ENSG00000060982.15_BCAT1	NA	15.0244772182132	16.0000757201584	14.7213738673169	15.7987242479011	14.516024914358	15.6310735394063
ENSG00000061273.18_HDAC7	NA	13.3230502079851	13.1905331119944	12.6691653193048	13.2025721822	12.9301776001204	13.1700437690557
ENSG00000061337.15_LZTS1	NA	9.82254027771114	10.4259596201869	9.20824586284248	10.264333844936	9.55376948303812	9.9170106582774
ENSG00000061455.11_PRDM6	NA	8.69660502176185	7.6719036509904	8.00039222039664	7.56483597617654	8.39540739079866	8.42907953402816
ENSG00000061492.12_WNT8A	NA	1.23773309057468	-1	2.25080803793905	-1	2.04098824485641	-1
ENSG00000061656.10_SPAG4	NA	6.51657568111456	6.38842895942756	7.01513264125513	5.97264110587286	7.25116499321287	6.04083613276453
ENSG00000061676.15_NCKAP1	NA	15.9836546388657	16.1688002251201	15.6678884950016	16.146690592237	15.5880350234315	16.0457542659762
ENSG00000061794.13_MRPS35	NA	13.8051269075526	13.6726295060528	14.3648757856031	13.6820486838816	14.0527456722639	13.9128719992305
ENSG00000061918.13_GUCY1B1	NA	10.681491074571	10.0439832413476	11.0839525568104	10.000731541276	10.7264357744481	10.1322160075489
ENSG00000061936.9_SFSWAP	NA	12.5618615950066	12.7914657809568	12.1266732616317	12.8757762702624	12.468711781991	12.8289220858896
ENSG00000061938.19_TNK2	NA	11.2795788254428	11.7127153775479	10.743051430663	11.799726722136	11.3587018724029	11.4190281142558
ENSG00000061987.16_MON2	NA	13.4134221079578	13.3245539787447	12.9001424498981	13.3502708935206	12.9918248696535	13.5928910114021
ENSG00000062038.14_CDH3	NA	13.8481197778599	13.9493682658768	13.7701036412522	13.904311148766	13.906634828953	14.0300396804287
ENSG00000062194.16_GPBP1	NA	13.6166169792835	13.7677384680553	13.7871571412638	13.8223419524072	13.6819984669932	13.8296934172719
ENSG00000062282.15_DGAT2	NA	9.91846539494265	9.75517020532113	10.1774411487097	9.85973033344607	10.1505084412665	10.1215297098845
ENSG00000062370.16_ZNF112	NA	9.57614918117115	10.1383702700714	9.09762372382522	10.0278886064893	9.1974086126734	9.92931757847361
ENSG00000062485.19_CS	NA	15.5261523719978	15.9374318139453	15.2171229760751	16.0615347997248	15.4681977725097	16.0488713806068
ENSG00000062524.16_LTK	NA	8.80247255968819	8.09235873684118	8.52726658331125	7.95270758755721	8.73538147204769	8.27044598451137
ENSG00000062582.14_MRPS24	NA	13.0639746893917	12.5331405085107	13.3990876803742	12.7016298185514	13.3003548950304	12.5193281413973
ENSG00000062598.18_ELMO2	NA	12.2089842499566	12.3682890369348	11.7396997704695	12.3724904905217	11.9223970436857	12.3887628133126
ENSG00000062650.19_WAPL	NA	13.440563110798	13.695578713916	12.7146706789322	13.8312334776066	13.0312989228287	13.7720208814044
ENSG00000062716.13_VMP1	NA	13.8452991766392	13.5831643319822	14.7793403165224	13.6816212349452	14.3393398950803	13.6725295637321
ENSG00000062725.10_APPBP2	NA	13.0851076774957	13.6197551632855	12.78100064688	13.6674438975749	12.7562071688346	13.4865587627105
ENSG00000062822.14_POLD1	NA	13.0980074272347	12.5762141673444	12.6698727574804	12.6965614371787	13.0154812049439	12.4412696367453
ENSG00000063015.20_SEZ6	NA	-1	3.14198696342875	0.646045912731413	3.7174550846552	3.38432637629481	3.6396016535685
ENSG00000063046.17_EIF4B	NA	16.7758147475952	17.1581679665478	16.5646486808685	17.1496441531777	16.63558677919	17.0673706935287
ENSG00000063127.16_SLC6A16	NA	5.63646037300286	6.44861659573961	5.88430571392619	6.6686560316446	5.56981165558017	5.45126185076703
ENSG00000063169.10_BICRA	NA	10.7161682971262	11.3852055264171	10.1853791898663	11.7111928812331	10.6161156138735	10.6211728054374
ENSG00000063176.16_SPHK2	NA	12.2680643602984	13.0437917803985	11.886100429362	13.2648196562081	12.133585645654	12.6365518140765
ENSG00000063177.13_RPL18	NA	16.2165368751131	16.2040789522083	16.90762138044	16.2006418204249	16.6706953355706	16.3137664929478
ENSG00000063180.9_CA11	NA	9.7355897572532	8.99339252677271	9.88423566571036	8.9138893215961	9.87168317286896	9.17825257743017
ENSG00000063241.8_ISOC2	NA	12.195043789406	12.2960713365578	12.4868771029233	12.4275706645141	12.6273579312952	12.2209264688305
ENSG00000063244.12_U2AF2	NA	15.5838416486183	15.4191589076923	15.092594462544	15.5397614810073	15.3817818722382	15.3563161545964
ENSG00000063245.14_EPN1	NA	13.8676213974473	13.6037142683701	13.4346267111722	13.7627675201116	13.8446123135136	13.5778774776841
ENSG00000063322.15_MED29	NA	13.2993114574732	13.060763859909	13.0072088146407	12.9866828275306	12.9826715519612	13.1536740954623
ENSG00000063438.17_AHRR	NA	5.74041195259516	4.73724315776088	5.06656603101697	5.07020395390465	4.47194437098392	3.27834984296906
ENSG00000063515.2_GSC2	NA	1.23773309057468	-1	0.646045912731413	1.29089905871014	2.56630615203523	1.7051978671648
ENSG00000063587.14_ZNF275	NA	12.136108863422	12.2099392703904	11.2151066486797	12.3465699813018	11.7457187791128	12.5884295612653
ENSG00000063601.17_MTMR1	NA	12.7299246732146	11.5280411805586	11.9619978795526	11.4396320513714	12.275526119115	12.4815233669369
ENSG00000063660.9_GPC1	NA	14.1048299109988	13.2633819640046	13.3121888736148	13.3803461115343	13.7674198742425	13.3363865005361
ENSG00000063761.16_ADCK1	NA	9.80915487762257	8.75996901173184	9.49256303581268	8.64239472268924	9.66074005421143	9.60382558447897
ENSG00000063854.13_HAGH	NA	12.5007264647684	12.2485428719289	12.4669346838683	12.1445928450303	12.3853772871965	12.1534618590319
ENSG00000063978.16_RNF4	NA	13.5600272105001	13.5768575627109	13.1737405535952	13.668630678171	13.4469767002009	13.7446196131545
ENSG00000064012.21_CASP8	NA	10.8723456761854	10.5706560028253	10.9683260905003	10.6197782815775	10.7763569891464	10.9275850122491
ENSG00000064042.18_LIMCH1	NA	12.4942356988374	12.7526999241285	11.8149695581913	12.6203268281649	11.8052266452805	12.5161586472661
ENSG00000064102.15_INTS13	NA	12.911041455951	12.7541912308515	12.7990048253301	13.0173249373688	13.0330112184916	13.065824609661
ENSG00000064115.11_TM7SF3	NA	14.7348681550386	14.6934802173742	14.8164991445332	14.7236727192308	14.7072950077945	14.7200593075995
ENSG00000064195.7_DLX3	NA	8.1205613177342	7.25523895740579	7.88164634918525	7.25125308232864	8.06625188391159	7.8999223218269
ENSG00000064199.6_SPA17	NA	11.6440602839862	11.2766319576319	12.2172152059766	11.1319807959405	11.8877180912922	11.4927488287451
ENSG00000064201.15_TSPAN32	NA	-1	0.756704934741344	0.646045912731413	1.29089905871014	1.68322706982405	-1
ENSG00000064205.10_CCN5	NA	2.98788607713756	2.39465370156298	2.25080803793905	2.87062454522425	3.50408896330302	4.09291939637801
ENSG00000064218.5_DMRT3	NA	9.79262447270804	9.09418029057955	9.6500007181836	9.07618749214533	9.55376948303812	9.57103734905487
ENSG00000064225.12_ST3GAL6	NA	8.44293425119597	7.25523895740579	9.29640070006596	6.8500178675029	8.95884290356648	7.9219870886022
ENSG00000064270.12_ATP2C2	NA	9.9634664161181	11.2627291717166	9.89718242078509	11.1130848292089	9.96335191571146	11.0977717855602
ENSG00000064300.9_NGFR	NA	7.36595057012569	7.17437532602962	7.23502951468179	7.38328798692529	7.06894066848896	7.96512933496235
ENSG00000064309.14_CDON	NA	11.2396690367891	11.636598472779	10.6264136480585	11.772287751995	10.7432688454168	11.5069602339193
ENSG00000064313.12_TAF2	NA	13.0818646369316	13.4717069376306	12.4999321236164	13.5606159815331	12.7669104650742	13.4992266473796
ENSG00000064393.16_HIPK2	NA	12.3771610303046	12.2128344904958	11.4843241310102	12.2848706207829	12.1854564648598	13.1437330486803
ENSG00000064419.13_TNPO3	NA	13.5147051261654	13.5437541327561	12.8073876501578	13.6443785871958	13.1776596011565	13.7067924404723
ENSG00000064489.23_BORCS8-MEF2B	NA	8.4846952013611	8.02147263117517	7.82179408769806	7.76532750417533	7.96551798301909	7.73522910996922
ENSG00000064490.14_RFXANK	NA	13.4594886256495	13.6130588747932	13.6436474442404	13.5449566060893	13.7334537363963	13.7099663514684
ENSG00000064545.15_TMEM161A	NA	12.6733848550267	12.4949982981245	12.6837156721221	12.6791088742796	12.9873357598153	12.7061511903532
ENSG00000064547.14_LPAR2	NA	12.1603239585598	12.5185895204594	11.8319253338279	12.6806069970694	12.1251454950738	12.4484134231772
ENSG00000064601.18_CTSA	NA	14.0700246667446	14.1388170841083	13.8948602511157	14.1627355465837	14.0367747607987	14.0557605756165
ENSG00000064607.17_SUGP2	NA	13.5261130114134	14.0472001488466	13.1558404034367	14.043050506208	13.42970933463	13.8665143773282
ENSG00000064651.14_SLC12A2	NA	12.4830402768736	13.0292889676596	11.6324897551798	13.2173927246362	12.0376015274284	13.3553863100351
ENSG00000064652.11_SNX24	NA	10.7390933175899	11.1933320807877	10.9698588591815	10.9803610095273	10.8431821177681	11.0995879865641
ENSG00000064655.19_EYA2	NA	9.33179684827105	8.56076008089791	9.22374581923816	8.74087249790373	9.72532186379327	8.95300932547581
ENSG00000064666.15_CNN2	NA	15.0288143980313	15.309575916671	14.8632268525948	15.348570793123	14.9983069920511	15.2654321921047
ENSG00000064687.12_ABCA7	NA	11.6246640449486	12.414291329447	11.2470617647505	12.4116787252984	11.5530494656418	11.7143813374195
ENSG00000064692.19_SNCAIP	NA	5.90604538676313	5.62277558533674	5.53261477706341	5.30144489193378	5.33156213999963	5.38925868109724
ENSG00000064703.12_DDX20	NA	12.6452036428603	12.6415973940999	12.4590436048679	12.8066990309279	12.515560664064	12.7073427546871
ENSG00000064726.10_BTBD1	NA	13.649117811286	13.7156192858059	13.6840110777394	13.8602304470169	13.5883436460251	13.9657742159751
ENSG00000064763.11_FAR2	NA	10.1365895485074	9.61118169062676	10.1452448690996	9.72351302950188	10.0847895347751	9.83507698122962
ENSG00000064787.13_BCAS1	NA	2.60284416365316	3.76403810905452	1.88542602307657	3.21110909091156	1.20641608165016	1.22681122250844
ENSG00000064835.11_POU1F1	NA	-1	0.756704934741344	-1	0.559151537014313	0.489356241498477	-1
ENSG00000064886.14_CHI3L2	NA	2.07606432475589	1.52569523028648	3.47880794134591	0.559151537014313	2.32742628316446	2.06384183801434
ENSG00000064932.16_SBNO2	NA	12.1864418513299	12.4227558128163	11.6363556687592	12.6214415647332	12.1985540958698	12.35874489396
ENSG00000064933.17_PMS1	NA	11.7341682782907	12.0349072672703	12.2704260199523	12.1249194841553	12.0282667909814	12.0486197128375
ENSG00000064961.19_HMG20B	NA	13.4368205644688	12.769265982421	13.3846519904012	12.8333048269629	13.5168346320641	12.8757771900903
ENSG00000064989.13_CALCRL	NA	10.9020705728041	11.5499581154741	11.0517477186822	11.5691383611094	10.595195141201	11.0935250704406
ENSG00000064995.18_TAF11	NA	12.017290905164	11.9089085796616	12.5086581770058	11.8663123811633	12.130390019012	11.7487370875054
ENSG00000064999.15_ANKS1A	NA	12.72141496922	12.7805305511769	12.1228893394077	12.9311267419292	12.6878947880087	13.0089781037989
ENSG00000065000.18_AP3D1	NA	14.6048546323173	14.6278841036341	13.7984151707937	14.7618825241413	14.3493072581457	14.7929119108919
ENSG00000065029.15_ZNF76	NA	12.2707794917807	13.1729861760166	12.0041209224031	13.2616773107286	12.1451467986749	12.79942767994
ENSG00000065054.14_SLC9A3R2	NA	13.0042102699119	13.006736442322	12.8114540123872	12.8952623798598	13.0266186697705	12.8217882058203
ENSG00000065057.9_NTHL1	NA	11.1581371573681	11.1999133288423	11.5641185073743	11.2223297779159	11.558679834826	10.869870719991
ENSG00000065060.17_UHRF1BP1	NA	12.915906309797	14.06733519623	12.3756417189505	14.1779688428294	12.7172365484747	14.2335506927174
ENSG00000065135.11_GNAI3	NA	14.272906320728	14.1658679604006	14.3152465785609	14.2674914269002	14.1721922457987	14.2501339366158
ENSG00000065150.21_IPO5	NA	15.3231282167344	15.3850730000573	15.6831234211105	15.5695512311643	15.7427184392205	15.5987718885157
ENSG00000065154.11_OAT	NA	13.9116906342621	13.3435011717294	14.0722018439125	13.3229854236149	13.8368802641338	13.5314275987669
ENSG00000065183.16_WDR3	NA	13.2320803555049	13.0769428454392	12.8894512428579	13.3176309224702	13.3472788244729	13.4672286749815
ENSG00000065243.20_PKN2	NA	13.9128209297716	14.0186338764767	14.1461735740586	13.9039447387093	13.9678105191386	14.1715883112861
ENSG00000065268.10_WDR18	NA	12.5777360483777	12.5147821006727	12.4298274828792	12.8752156384596	12.8462558665368	12.534400774145
ENSG00000065308.5_TRAM2	NA	12.438335428882	12.4038779495261	11.6071056067305	12.402370171758	12.0154108457425	12.4764070451094
ENSG00000065320.9_NTN1	NA	11.5052384232155	10.9461034618847	10.768815009989	11.1092757540786	11.514792901249	11.6787825487268
ENSG00000065325.13_GLP2R	NA	-1	-1	-1	-1	-1	1.22681122250844
ENSG00000065328.16_MCM10	NA	12.9484914471617	12.5455380418037	12.4764012747878	12.6827444774525	12.6649882304584	12.5702072915229
ENSG00000065357.20_DGKA	NA	10.8251004588187	10.6592853523839	10.7286375988069	10.4713914812345	10.8057924583232	10.8390372647436
ENSG00000065361.15_ERBB3	NA	13.9048028079451	13.6696033100386	13.1255615534859	13.3946303198136	13.2566575916176	13.581997439378
ENSG00000065371.17_ROPN1	NA	2.07606432475589	2.68888213318037	2.54210121923842	1.29089905871014	2.04098824485641	2.79529286833288
ENSG00000065413.20_ANKRD44	NA	8.95341302634078	9.01013241148048	8.71079001619822	9.21498806646876	8.69505005056962	9.36902205530866
ENSG00000065427.14_KARS	NA	14.2924110964103	14.2013770354442	14.1375901097319	14.3252780920796	14.3352452735303	14.4334526048729
ENSG00000065457.10_ADAT1	NA	12.1491528409879	12.2847652142328	11.8685410782582	12.2999877331313	11.9848532559219	12.2175853121297
ENSG00000065485.20_PDIA5	NA	11.9310106446639	11.1763756580229	11.4556205898148	11.2193879192243	11.6401918310422	11.4927488287451
ENSG00000065491.8_TBC1D22B	NA	11.6598888845054	12.049556438123	11.4697729395411	12.0579926321474	11.6278840082512	12.0124436907035
ENSG00000065518.8_NDUFB4	NA	13.8067180427223	13.9845226089301	14.2770646224545	13.8034108694953	14.0335903542709	13.8259499600447
ENSG00000065526.11_SPEN	NA	13.54496534172	13.7615727897576	12.6194947912484	13.8916159135098	13.2680701670008	14.0488837180488
ENSG00000065534.18_MYLK	NA	10.3092193366697	10.3582762082872	9.77975304227114	10.1279161937782	10.0823861504614	10.2932355358089
ENSG00000065548.18_ZC3H15	NA	13.808400863544	13.5524943615036	14.2051944594694	13.6781970765029	14.0877658195515	13.8599216498064
ENSG00000065559.15_MAP2K4	NA	12.4281559992421	12.6437444936407	12.378818209867	12.7062602445321	12.3342772219079	12.7176286276133
ENSG00000065600.12_PACC1	NA	11.8581395578479	11.472954427641	12.4124604890545	11.5092142954297	12.133585645654	11.5014756390592
ENSG00000065609.14_SNAP91	NA	8.80547168899131	9.68392864716392	8.95941042412489	9.33291469176237	8.6208098766336	9.16674856639361
ENSG00000065613.15_SLK	NA	13.1403405983392	13.3218746982818	12.3232435670012	13.3866538390107	12.6116099853169	13.4624142241477
ENSG00000065615.14_CYB5R4	NA	12.0631194719373	12.6062515816808	12.6825476813229	12.6501264530152	12.2948579438017	12.3450303398555
ENSG00000065618.21_COL17A1	NA	3.29151283071405	2.02463226269727	2.25080803793905	2.66457719062308	3.38432637629481	2.79529286833288
ENSG00000065621.15_GSTO2	NA	10.7161682971262	10.6216548096291	11.3459875858345	10.5446740714884	11.0681525189877	10.7446973128502
ENSG00000065665.21_SEC61A2	NA	10.7876751046727	11.0541726952491	11.2590215060492	10.9761843536871	10.9940097949179	10.8670301298183
ENSG00000065717.15_TLE2	NA	11.6640256020819	10.8884206407318	11.4676046707842	10.8646238965902	11.6887942874817	10.9896232114391
ENSG00000065802.12_ASB1	NA	12.3098492977641	12.7356898235684	11.6819562098117	12.7598865994862	12.0691987734058	12.7195983002596
ENSG00000065809.13_FAM107B	NA	11.7629955729634	12.1409335022641	11.9186078654261	12.1972760989683	11.9267576151319	12.290950988253
ENSG00000065833.9_ME1	NA	12.9626661729109	13.8844606050854	13.086708562069	13.9547997858165	13.002986910296	14.0239157873979
ENSG00000065882.16_TBC1D1	NA	12.4615741466821	12.8230724328927	12.1545722192586	12.8121767493951	12.3470977915413	12.7182198118184
ENSG00000065883.16_CDK13	NA	12.6897084830743	12.9475683396496	12.0093474489565	13.1265670711278	12.2818243275468	12.940709520738
ENSG00000065911.12_MTHFD2	NA	15.0692630733208	16.3750836052936	15.6517749536108	16.4712313419295	15.4827653544891	16.5103086644121
ENSG00000065923.10_SLC9A7	NA	11.6402858308341	11.8473609416443	11.1644683326635	11.9082022631583	11.3153555665399	11.9402946190479
ENSG00000065970.9_FOXJ2	NA	12.5329755518372	12.2580345052364	11.7934907019447	12.2047326535351	12.0941665274872	12.5899377453829
ENSG00000065978.19_YBX1	NA	16.6479204160782	16.4258333217169	16.3627187269298	16.6386010355691	16.4841663591346	16.6349461555531
ENSG00000065989.16_PDE4A	NA	10.8730605759918	10.9179939080707	10.5257994702352	10.7321963156667	10.7948244166353	11.3484822518196
ENSG00000066027.12_PPP2R5A	NA	12.6684515321516	12.3137091600615	12.5399516511917	12.4275706645141	12.5328265846812	12.5995957490696
ENSG00000066032.18_CTNNA2	NA	8.05150506654561	8.36643904438106	7.57021592372084	8.33837810464923	7.73401388637842	7.47660350513092
ENSG00000066044.15_ELAVL1	NA	14.3187575406625	14.6805974274223	14.0596608511101	14.7723582269171	14.2454525806043	14.6452495243567
ENSG00000066056.14_TIE1	NA	1.71695370984036	-1	2.78434487607049	0.559151537014313	0.489356241498477	0.506140336067499
ENSG00000066084.13_DIP2B	NA	13.1148785114266	13.652778178008	12.3336979905702	13.7645849599647	12.7963540418682	13.712540022571
ENSG00000066117.15_SMARCD1	NA	14.5049059643895	14.0810663257817	13.9806106674369	14.1071609000599	14.2061863037121	14.4945442404842
ENSG00000066135.13_KDM4A	NA	13.8025023828341	14.1265870734558	13.1494295168034	14.1448610285831	13.4511741249207	14.240632163395
ENSG00000066136.20_NFYC	NA	12.9230003785597	12.8075950751435	12.8659772325271	12.8449951456814	12.9705385490206	13.0078502484352
ENSG00000066185.13_ZMYND12	NA	6.11387222717871	5.39701401244114	7.24519156079344	5.59086304992406	6.50592001987373	5.38925868109724
ENSG00000066230.12_SLC9A3	NA	9.34834316494556	10.102914627071	9.10322132655629	10.2447912762333	9.23684373694238	10.0987064055977
ENSG00000066248.15_NGEF	NA	11.7976733984636	11.1614671869333	11.8008294488397	11.010625846833	11.9088966332492	11.3300354644955
ENSG00000066279.18_ASPM	NA	14.0011447679926	14.6506831719857	13.0387697270133	14.6324013183282	13.3141193897216	14.5016013706516
ENSG00000066294.14_CD84	NA	1.23773309057468	0.756704934741344	1.39492385926443	1.77408377862989	0.489356241498477	-1
ENSG00000066322.15_ELOVL1	NA	13.6874202282797	13.1901658934943	13.5108354775824	13.2665307823898	13.5210557851777	13.3968425318322
ENSG00000066336.11_SPI1	NA	3.14767234200784	3.48628246289959	3.61041742401945	2.13540673558656	3.71737006492186	2.06384183801434
ENSG00000066379.15_ZNRD1	NA	11.6922501715591	10.6303430201381	12.4774792262713	10.6108258308214	12.1938303697019	11.133668369726
ENSG00000066382.16_MPPED2	NA	11.801058208748	12.0732477290842	11.9902161156107	11.9382141921328	11.7968219764391	11.8187673369336
ENSG00000066405.13_CLDN18	NA	3.14767234200784	1.52569523028648	2.78434487607049	2.13540673558656	2.32742628316446	2.06384183801434
ENSG00000066422.5_ZBTB11	NA	12.8891210094218	13.3383734484973	12.5083945251279	13.4209898751988	12.6404873193188	13.4764602396244
ENSG00000066427.24_ATXN3	NA	10.4375175258972	11.1681950704116	10.3055710851653	10.9955727886441	10.1789076771634	10.8354088332672
ENSG00000066455.13_GOLGA5	NA	13.0236570864993	12.8329855977524	12.7082571323683	12.8074828366456	12.6729970464595	13.0624141806173
ENSG00000066468.22_FGFR2	NA	10.9516445995968	9.80973418235308	10.0729190313489	9.03394743265392	9.7558061240631	9.24541434167741
ENSG00000066557.6_LRRC40	NA	12.3956877450443	12.5495515665882	12.8849900084658	12.5384223230965	12.5420387332837	12.5756546835815
ENSG00000066583.12_ISOC1	NA	12.829413803625	12.9842494376784	12.7160413087551	13.0862817812546	12.7670975352362	13.1295809798853
ENSG00000066629.17_EML1	NA	12.064684883443	11.7223982035449	11.7664049956899	11.5852245764009	11.8911550833959	11.9664071967831
ENSG00000066651.20_TRMT11	NA	11.138649266606	11.0412003378005	11.5882690617617	11.2010132685279	11.4132682081076	11.2667849098151
ENSG00000066654.14_THUMPD1	NA	13.4591315829561	13.5503500293096	13.2378024379712	13.5642145911478	13.2117327553675	13.609662943696
ENSG00000066697.14_MSANTD3	NA	12.4741152062902	12.2400531189474	12.7328395387703	12.1529428473374	12.5019123502254	12.2800477060884
ENSG00000066735.14_KIF26A	NA	11.3335564530082	12.3994373426367	10.7222859792644	12.3124654404272	11.0934366405392	11.7116130401538
ENSG00000066739.12_ATG2B	NA	11.9237834539142	13.0311354415368	11.2888012213242	13.1689635867358	11.5715897388137	13.0549451418449
ENSG00000066777.9_ARFGEF1	NA	13.7996850837259	13.719695986494	13.1152102961935	13.618037395944	13.2334225887731	13.6760839912943
ENSG00000066827.16_ZFAT	NA	10.5274494568758	11.258532075542	9.79885106746157	11.2691706290796	10.1878786217301	10.9309891326076
ENSG00000066855.16_MTFR1	NA	12.2850849956465	12.5635116221194	12.9448625415236	12.671379572977	12.7605356035491	12.7215652874309
ENSG00000066923.17_STAG3	NA	7.45267798613302	7.87563602874127	7.512490375442	7.77817932412738	7.61932919718816	7.76605139179227
ENSG00000066926.11_FECH	NA	13.6175771374758	13.6299447658828	13.4784931747945	13.5904095462095	13.3319329386022	13.6228783598212
ENSG00000066933.16_MYO9A	NA	12.1205396455102	12.4854527237391	11.4004251062566	12.4116787252984	11.5754402898795	12.3493619623239
ENSG00000067057.17_PFKP	NA	13.3247496437314	13.0543218266364	12.7892714190961	13.2866264941577	13.2213219415644	13.3091761398937
ENSG00000067064.11_IDI1	NA	15.1572177070674	16.057623386401	15.9470458665934	16.1059758880024	15.7377396852514	16.1768912066483
ENSG00000067066.17_SP100	NA	8.85262874230346	8.00820151329177	9.36557140675738	7.70603402051512	8.96407429955659	7.97571628638594
ENSG00000067082.15_KLF6	NA	11.6780023742904	12.031631596387	11.7033060033874	12.093451750819	11.5928527974521	11.9604230307144
ENSG00000067113.17_PLPP1	NA	10.3843531991564	10.3803338085115	10.6533722451511	10.4900640516173	10.3273570977422	10.3744896434728
ENSG00000067141.17_NEO1	NA	13.3906367737219	13.4212827552882	12.7910066088387	13.3629895964523	13.0682041961834	13.5344518727822
ENSG00000067167.8_TRAM1	NA	14.9466836942277	14.8772691779597	15.0508408463728	14.8714003184699	14.8177031569935	15.061613499658
ENSG00000067177.15_PHKA1	NA	11.5515242390009	12.0180402827438	10.8911527334788	12.0543652940326	11.1695674719059	11.8639904278583
ENSG00000067182.7_TNFRSF1A	NA	13.7446932096238	13.6645895584882	13.3503471073424	13.779342305909	13.5763309098713	13.7366663408887
ENSG00000067191.16_CACNB1	NA	9.4629440372351	9.55524936294799	9.27919540353786	9.43990554035026	9.40206577228451	9.53211701884875
ENSG00000067208.14_EVI5	NA	11.5741219323949	12.0381755175162	11.1804431983438	12.1417987367339	11.1695674719059	12.1586979337058
ENSG00000067221.14_STOML1	NA	9.54956438484855	8.74404595568765	8.94077348480374	8.63181291350584	9.21726091227581	9.04133177978029
ENSG00000067225.18_PKM	NA	18.3501936641852	17.4296548703783	18.3357353243013	17.465419210906	18.2935036507204	17.6290928959099
ENSG00000067248.10_DHX29	NA	12.8045216408503	12.4970780000989	12.2036000939319	12.4811163937302	12.3465971645831	12.6591007076223
ENSG00000067334.14_DNTTIP2	NA	13.5743841099237	13.4140680262343	13.5357574604272	13.5561925019617	13.4804472451072	13.5052907830737
ENSG00000067365.14_METTL22	NA	10.517424613523	10.842424766983	10.5959669948316	10.910580242912	10.7117383691823	10.9303089508098
ENSG00000067369.13_TP53BP1	NA	14.096436597126	14.3026037284465	13.2872024791942	14.283002131141	13.6232765415699	14.2673368630221
ENSG00000067445.21_TRO	NA	12.3799301011001	11.9266518365937	11.9988753925744	11.6574297946995	12.075858933492	11.8625650310778
ENSG00000067533.6_RRP15	NA	12.3675540474266	12.5756519783673	12.3339955780518	12.784776795289	12.4617940858235	12.8120365535159
ENSG00000067560.12_RHOA	NA	16.170990133798	15.957232679459	16.5992731560355	15.9425086468222	16.3766487484894	16.0356905198947
ENSG00000067596.12_DHX8	NA	13.8346037207387	14.1070731696367	13.1882975316544	14.2009688542108	13.5231617392795	14.1075970949554
ENSG00000067601.8_PMS2P4	NA	6.98712556896225	6.1674709326699	7.73792110414249	6.31007827479827	7.45812567603945	6.48806206963984
ENSG00000067606.17_PRKCZ	NA	12.2431189739494	11.7550406608433	11.6973043248613	11.8794176224305	11.9529767662908	11.7568161074899
ENSG00000067646.12_ZFY	NA	1.71695370984036	0.756704934741344	2.54210121923842	-1	2.56630615203523	1.7051978671648
ENSG00000067704.10_IARS2	NA	14.0807403707368	14.0430375260828	13.9082121554165	14.0753804432803	13.9286269751407	14.0128750327114
ENSG00000067715.14_SYT1	NA	7.91376816338929	8.03462278210599	7.07332801191233	7.82227997540887	7.3016277787768	7.24241446584993
ENSG00000067798.16_NAV3	NA	6.99765330610964	6.85666001343518	6.52480197253168	6.6266383908548	6.35479856838868	6.71984038360481
ENSG00000067829.19_IDH3G	NA	11.7942806281538	11.1719192707368	11.6315216559753	11.111181548757	11.6401918310422	11.346953996416
ENSG00000067836.12_ROGDI	NA	10.7351666273769	11.0040775146975	10.932615330177	10.9698966103375	10.845309931283	10.6245405538171
ENSG00000067840.12_PDZD4	NA	10.6880060796541	11.2869718249689	10.2549220143614	11.1727007606793	10.6505931336428	10.8860964572008
ENSG00000067842.17_ATP2B3	NA	6.01369787688663	6.54366474761262	5.74802288828979	6.41254465145769	6.32257738875178	6.70718989152012
ENSG00000067900.8_ROCK1	NA	13.3519282830996	13.8660725025241	12.4967458818602	13.9212472545359	12.8734440614068	13.85876035035
ENSG00000067955.15_CBFB	NA	13.7257217964049	14.1018115589986	13.4655134593635	14.2563401129129	13.5007256577532	14.1864047359857
ENSG00000067992.15_PDK3	NA	11.4270703557506	12.0279375546009	10.8805981804795	12.0724114653556	11.1041384993419	11.9674021490083
ENSG00000068001.14_HYAL2	NA	13.1218127191712	13.2481159877935	13.140440173002	13.356175603975	13.2659537215617	13.2001216641515
ENSG00000068024.16_HDAC4	NA	10.9698043142497	11.4626534024894	10.3498007824726	11.6257838615586	10.7225825295404	11.1966795981943
ENSG00000068028.17_RASSF1	NA	12.0628061857049	12.5244275387665	11.7588885690496	12.6409212465549	11.9437383197226	11.9855223785487
ENSG00000068078.18_FGFR3	NA	10.9173997227497	8.58777591977973	9.34917615776016	8.51766670148655	9.9659618225404	9.02613319909832
ENSG00000068079.7_IFI35	NA	8.40784355556451	7.52122810470808	9.03749909654166	7.2786444805017	9.0027165554146	8.14003792037631
ENSG00000068097.14_HEATR6	NA	11.4512080550285	12.025881214716	10.9286799239837	12.0645645171096	11.1159370819836	11.8710963633903
ENSG00000068120.15_COASY	NA	13.4144046579349	13.6562387033876	13.1943744875454	13.7736379741573	13.4842072169312	13.7677438447715
ENSG00000068137.15_PLEKHH3	NA	12.1676264842861	12.535744171315	11.6847589484683	12.8051301408266	12.0172993743769	12.1502526552041
ENSG00000068305.17_MEF2A	NA	12.0596695759683	12.4667764881859	11.7450805084522	12.5057138604466	11.8297926465453	12.6780649124235
ENSG00000068308.13_OTUD5	NA	13.0866494240082	12.6076271700457	12.6321341656855	12.7009972437853	12.8416446602375	12.8542441436426
ENSG00000068323.17_TFE3	NA	13.0131559452622	13.2197917333113	12.3253405210997	13.3632561571662	12.694794768269	13.1840916226362
ENSG00000068354.16_TBC1D25	NA	10.8243613876663	11.315535316622	10.3835435979828	11.5024535673398	10.6210917070361	11.19950504084
ENSG00000068366.20_ACSL4	NA	13.4083760096336	14.0412062323923	13.6613048409145	14.0272406914315	13.5040965593892	13.8719263609809
ENSG00000068383.19_INPP5A	NA	10.8709148129297	10.9117712482493	10.4176388356376	10.8995952784008	10.595195141201	11.1158317203916
ENSG00000068394.11_GPKOW	NA	11.7451437537545	11.7767252057245	11.1557408507781	11.660035887427	11.4261195244648	11.7265774879833
ENSG00000068400.13_GRIPAP1	NA	12.282934743114	12.6760979078304	11.5792599136095	12.6025987055674	11.9394288481747	12.4743087634786
ENSG00000068438.15_FTSJ1	NA	12.6905198362379	12.4124035697839	12.5926358468273	12.4359584298174	12.7440940326567	12.6119492278213
ENSG00000068489.12_PRR11	NA	12.3652693085637	12.6737358109542	12.4420268355536	12.581674927773	12.3563281922791	12.5660534735634
ENSG00000068615.18_REEP1	NA	12.7866103619286	12.7000245221526	13.102165900467	12.6496894391366	12.8387996517016	12.6711606368484
ENSG00000068650.18_ATP11A	NA	11.8036853596055	12.2103014908065	11.0254560154442	12.3599892146359	11.6050432859375	12.4154981246353
ENSG00000068654.16_POLR1A	NA	13.7427388064875	13.9372748471266	12.9222799901237	14.1191272849345	13.5129357709947	14.2212302693682
ENSG00000068697.7_LAPTM4A	NA	14.7041121926876	14.2148882993731	15.3373285724466	14.179256286385	14.8975829056312	14.1561091791634
ENSG00000068724.17_TTC7A	NA	12.1396780239659	11.9459206364614	11.4534309301792	12.0540350833354	11.8383640852773	12.0108360672831
ENSG00000068745.15_IP6K2	NA	13.7111028243085	13.8514004158217	13.9355317370525	13.8145653950188	13.8673011547513	13.8050463666396
ENSG00000068781.21_STON1-GTF2A1L	NA	3.29151283071405	4.19726840084991	0.646045912731413	4.45383714145649	4.14343816954976	-1
ENSG00000068784.13_SRBD1	NA	11.7207276772108	11.4632613854302	11.1401693902499	11.333164558	11.2942228656205	11.5937106293837
ENSG00000068796.16_KIF2A	NA	12.8134876851242	12.9460467203192	12.7132987457065	13.0256007671261	12.6855214631593	12.9513089069891
ENSG00000068831.19_RASGRP2	NA	5.97159584213153	6.66701655183661	7.03869322802181	6.6266383908548	6.20377444563559	6.28170979065322
ENSG00000068878.15_PSME4	NA	13.6153357735279	13.9732551674364	12.9781823053826	14.1356840002836	13.3148873557942	14.0883664721507
ENSG00000068885.15_IFT80	NA	12.0568407847575	12.6520344528692	12.6187622070354	12.4761954656903	12.2699925412943	12.3845480598327
ENSG00000068903.20_SIRT2	NA	12.152395490861	12.2307991563927	12.0100925523373	12.259031532977	12.143706710997	12.1517122692409
ENSG00000068912.14_ERLEC1	NA	13.6379097434442	13.4137535224292	13.9346489929733	13.4059308470406	13.6089455867235	13.4730782956592
ENSG00000068971.14_PPP2R5B	NA	10.5747979985534	9.85120352440052	10.0955617819071	9.63267353242497	10.2373264520357	10.593944004612
ENSG00000068976.14_PYGM	NA	5.78970752561229	7.33180970388847	5.85805963571011	7.39167510621562	6.13121927759053	6.96270104688074
ENSG00000068985.5_PAGE1	NA	-1	-1	1.88542602307657	-1	-1	0.506140336067499
ENSG00000069011.16_PITX1	NA	12.210399201276	11.0468901022239	11.8310822612656	11.4202907324741	12.1341659089512	11.3155230977261
ENSG00000069018.18_TRPC7	NA	-1	1.52569523028648	-1	-1	-1	-1
ENSG00000069020.18_MAST4	NA	10.2911460520292	10.8055014595214	9.5994067109086	10.8387863461787	9.77230190434209	10.8075304150514
ENSG00000069188.17_SDK2	NA	5.81373772649806	6.23738228747774	5.80409009350066	7.40830447126073	8.713804750978	9.60382558447897
ENSG00000069248.12_NUP133	NA	12.6603987275715	12.7364445132581	12.403697959535	12.8039523525913	12.532606529261	12.7307743731431
ENSG00000069275.13_NUCKS1	NA	16.2487406288996	16.1062885343993	15.6885153212615	16.0368488533708	15.8347698772815	16.4682130215515
ENSG00000069329.18_VPS35	NA	14.5480161671288	14.4674387333758	14.8737041100659	14.4637234351245	14.6960892882584	14.429125876421
ENSG00000069345.12_DNAJA2	NA	13.6061203507947	13.3525541334111	14.0511788807665	13.4324677166782	13.827851687748	13.3496744400607
ENSG00000069399.15_BCL3	NA	8.84390340844758	8.34019989778319	8.01827935022409	8.94556566933429	8.58050412128714	8.44058913330877
ENSG00000069424.15_KCNAB2	NA	7.83963245029485	8.63170762927372	7.60219371036946	8.62471500716094	7.49473437842235	7.69094078013319
ENSG00000069431.11_ABCC9	NA	-1	1.52569523028648	-1	-1	1.68322706982405	0.506140336067499
ENSG00000069482.7_GAL	NA	10.2510094889782	9.20592779788689	10.5016308626959	9.95618807757794	10.7272051899871	9.89765541650016
ENSG00000069493.15_CLEC2D	NA	10.9995715975728	10.7939476698259	11.3618352833616	10.6877638496708	11.0287515695118	10.6870779255348
ENSG00000069509.6_FUNDC1	NA	11.7494328060745	11.4516656673563	12.192483445159	11.4411480110245	11.8553556834492	11.4421152418932
ENSG00000069535.14_MAOB	NA	7.4450056144792	5.62277558533674	7.5292204161576	6.08033294301964	7.99648347472164	6.7448133703329
ENSG00000069667.16_RORA	NA	9.23945526620976	9.79435390860334	9.38638088488852	9.70680557914216	9.0697668302441	9.68186910539415
ENSG00000069696.7_DRD4	NA	3.42230333690735	4.73724315776088	3.33397612761004	5.78163607194093	4.28393546044417	3.6396016535685
ENSG00000069702.11_TGFBR3	NA	11.8682144402835	10.8683628835411	11.2298939601205	11.010625846833	11.3427247611295	11.6048361743484
ENSG00000069764.9_PLA2G10	NA	4.77847218357551	4.67141626018303	5.56542742988981	3.7174550846552	4.34936550054092	4.01294168534126
ENSG00000069812.11_HES2	NA	11.115877644013	11.8584964104912	12.2246170092756	13.3624563272249	14.3053514545524	14.6898358901967
ENSG00000069849.11_ATP1B3	NA	13.7778056123777	13.5719331656042	14.0106130936459	13.8781552536692	13.9592400541448	13.7381244882015
ENSG00000069869.16_NEDD4	NA	10.6896302442768	11.2430374058224	10.5079748549535	11.2357855940746	10.5199319944737	11.8424601763923
ENSG00000069943.10_PIGB	NA	11.2167601034078	11.8300235786326	11.2247677204498	11.8150079344842	11.0368424470718	11.3108272339487
ENSG00000069956.12_MAPK6	NA	13.7115025863505	14.4787585329601	13.7476060445819	14.5622705028626	13.7132078308603	14.453947517315
ENSG00000069966.18_GNB5	NA	11.826378847666	12.0324512116357	11.5323134641853	12.0297232416607	11.5591120313674	11.8883594042738
ENSG00000069974.16_RAB27A	NA	11.5855075240112	11.8945551625667	11.304071406711	11.9556433535414	11.2070051170962	11.7548966308823
ENSG00000069998.12_HDHD5	NA	12.1096616786606	11.8538670725329	12.150522991052	11.9777472600456	12.2997800070931	12.0976072055341
ENSG00000070010.19_UFD1	NA	13.3210868298247	13.268608860346	13.7781089051661	13.299498399155	13.542743318276	13.1179793182658
ENSG00000070018.9_LRP6	NA	13.814740530667	13.8424315323446	13.1446874093945	13.7044189401366	13.4215324174931	14.2624812392947
ENSG00000070019.5_GUCY2C	NA	2.07606432475589	-1	2.54210121923842	0.559151537014313	4.14343816954976	4.01294168534126
ENSG00000070031.4_SCT	NA	1.71695370984036	2.02463226269727	-1	2.13540673558656	0.489356241498477	-1
ENSG00000070047.12_PHRF1	NA	13.2994444242908	13.2276857045015	12.3366711067119	13.3246289722842	12.9815434458647	13.2129025786295
ENSG00000070061.15_ELP1	NA	13.3784784953916	13.3930027579989	12.6992761967166	13.4491384075004	13.0387558893244	13.4814602986383
ENSG00000070081.17_NUCB2	NA	13.2096157538879	13.1446489994533	13.1000678083079	13.0574139146566	12.8573684286681	13.2524855759935
ENSG00000070087.14_PFN2	NA	15.0558664390503	14.9125892539444	15.8838652549112	14.8199884443712	15.4528421333524	14.8333115237797
ENSG00000070159.14_PTPN3	NA	12.0492701120244	12.0205209734129	11.5957339466461	11.973563019451	11.8150309227398	12.2080764632561
ENSG00000070182.21_SPTB	NA	9.77284116571948	10.0681652073612	9.18203669747578	9.90290957943537	9.58466521090688	9.78929876729937
ENSG00000070190.13_DAPP1	NA	8.45444400964728	8.72389176906641	8.58040758822218	8.68054387882318	8.02178983839718	8.53667049246741
ENSG00000070193.4_FGF10	NA	3.75573554863011	3.63183436999618	3.94562896621183	3.21110909091156	3.98776757058629	2.35084444806025
ENSG00000070214.16_SLC44A1	NA	13.6446240941142	13.9041853814178	13.4717474798449	13.7703251280082	13.3992566175922	13.7792156541055
ENSG00000070269.14_TMEM260	NA	11.713960126824	11.8417608094882	11.6753952336109	11.8355186224772	11.663693280914	11.8911583475646
ENSG00000070366.14_SMG6	NA	12.2058664635645	12.6581544313759	11.2476937026888	12.7003643915341	11.7850464704951	12.4698690104787
ENSG00000070367.16_EXOC5	NA	13.6547413299929	14.0912304170217	13.2719070612474	14.1027775043907	13.2688630342576	14.1488186065993
ENSG00000070371.16_CLTCL1	NA	10.4980906556282	10.5841348200192	10.1560569943371	10.6313340289145	10.3996032580758	10.6708817414072
ENSG00000070388.11_FGF22	NA	5.88351624213839	5.96256319457489	6.05576286073086	6.36222097206601	6.25589230939384	6.17550762164631
ENSG00000070404.10_FSTL3	NA	10.854357069031	10.5985961501199	10.9435776974354	11.0482486579391	11.5460894791823	11.4107620122695
ENSG00000070413.20_DGCR2	NA	14.5342407883078	14.0652341720507	13.9888552195438	14.1591322596806	14.2586178666354	14.1556000365706
ENSG00000070423.18_RNF126	NA	12.6723584696582	12.4095672907096	12.629227199873	12.9648921060665	12.9137116625853	12.6239875198451
ENSG00000070444.15_MNT	NA	10.9387271178237	11.735040549995	10.3650245432592	11.7810932088208	10.8968264744665	11.8428216595756
ENSG00000070476.15_ZXDC	NA	11.3885901310625	11.6328202564741	10.8984147603186	11.650020197003	11.2359467754973	11.6259932730487
ENSG00000070495.14_JMJD6	NA	11.6305949017557	11.6785661790006	11.2621523972837	11.8048384652037	11.4528798730541	11.4325404644517
ENSG00000070501.12_POLB	NA	12.0010314899606	11.6585315035564	13.126592606076	11.7622158768463	12.6101508336759	11.7506647712961
ENSG00000070526.15_ST6GALNAC1	NA	11.0261683411544	11.1219683839462	10.6993705838819	10.6962527440848	10.0569058917355	10.5181132370209
ENSG00000070540.13_WIPI1	NA	10.940092312164	10.6645819055728	10.18405921242	10.6419193383236	10.1308726129958	10.6093233888092
ENSG00000070601.10_FRMPD1	NA	7.47545328360322	7.93995054115406	7.33356575912193	7.78456255503767	7.60600494024835	8.04772628028168
ENSG00000070610.14_GBA2	NA	12.4296146082845	12.7200038570842	12.2159240503936	12.7244272555191	12.4455226191996	12.7333112229245
ENSG00000070614.15_NDST1	NA	14.1781778023944	15.0158691733463	13.4365679666628	15.1172116687168	14.0396424722794	15.1685798833443
ENSG00000070669.17_ASNS	NA	14.1599128676869	15.518993757734	15.5064391383209	15.6515023012019	15.2058912432932	15.7027995251799
ENSG00000070718.12_AP3M2	NA	12.0010314899606	11.9485283726986	12.2088019652817	11.982960552731	12.1913232978274	12.1461578621598
ENSG00000070729.14_CNGB1	NA	3.42230333690735	5.43718038743699	2.99170115686585	5.26538795390053	3.71737006492186	4.37471964540617
ENSG00000070731.11_ST6GALNAC2	NA	11.6934648892289	11.0436415564813	10.8903435805197	10.2191014513989	10.1811556483783	10.0152142412721
ENSG00000070756.16_PABPC1	NA	16.3895634695422	17.0031961643629	16.2695503383799	17.0780767384503	16.3909218691922	17.0667905622478
ENSG00000070759.17_TESK2	NA	10.070809455615	10.758720535514	10.0338846311528	10.5836302535064	9.96335191571146	10.3048273754835
ENSG00000070761.8_CFAP20	NA	13.4156319051367	13.0399250107033	13.9697356487779	13.0445067875784	13.6955268687092	13.1946092769489
ENSG00000070770.9_CSNK2A2	NA	13.3799881779293	13.5141337948663	12.9169263653466	13.5434283290028	13.1443472654509	13.7266137258957
ENSG00000070778.13_PTPN21	NA	10.8630195970151	10.8747751965408	10.4410349533902	10.7313705092569	10.6152845937908	11.0052092309537
ENSG00000070785.17_EIF2B3	NA	12.3027033478013	11.0436415564813	12.4734327485117	11.2317036149902	12.5376593313026	11.8449886586917
ENSG00000070808.16_CAMK2A	NA	-1	-1	-1	-1	0.489356241498477	0.506140336067499
ENSG00000070814.20_TCOF1	NA	13.6846741815297	14.1339566068946	12.8943023617894	14.4067383854687	13.5979454322045	14.2187256554756
ENSG00000070831.17_CDC42	NA	15.753707398384	14.9823280960292	16.619097363301	15.0198828029113	16.17345142217	15.4086834871019
ENSG00000070882.13_OSBPL3	NA	11.2335583567132	11.561928768869	10.7958559285328	11.6582990154537	11.0571793298636	11.5924213742323
ENSG00000070886.12_EPHA8	NA	6.07463315708683	6.28217596099559	6.69756139489517	5.70294365305073	6.54833315809851	6.47319543471842
ENSG00000070915.9_SLC12A3	NA	0.515145658870156	0.756704934741344	-1	0.559151537014313	1.20641608165016	-1
ENSG00000070950.10_RAD18	NA	12.0016853970871	12.1035929987478	11.769928632813	12.3193511507013	11.7794934407639	12.047992800733
ENSG00000070961.15_ATP2B1	NA	12.9567769529465	13.094709228496	12.4647621419982	13.1966010711818	12.8189064059402	13.5012890248397
ENSG00000070985.13_TRPM5	NA	1.71695370984036	2.93315015163294	2.54210121923842	2.66457719062308	3.50408896330302	1.7051978671648
ENSG00000071051.14_NCK2	NA	12.1461986395345	11.9314932173752	11.7606606663529	12.0097701025106	12.1143048389282	12.292804316637
ENSG00000071054.16_MAP4K4	NA	14.2672750366004	14.4543484322775	13.5398910861428	14.4919116894651	13.9365492844907	14.544401495383
ENSG00000071073.13_MGAT4A	NA	11.4005398888744	11.7375557792474	11.664551288357	11.7182956232531	11.4986609850302	11.7935573493592
ENSG00000071082.11_RPL31	NA	16.4013658299137	15.4682181041738	17.1520896637518	15.5500428810766	16.8260810063574	15.6092478721899
ENSG00000071127.17_WDR1	NA	15.2427813542026	15.2856703036019	14.8535553961478	15.3302459918592	15.0556372388357	15.1885912624913
ENSG00000071189.21_SNX13	NA	12.8491681929161	13.2488214259088	12.6415415545023	13.3006122866888	12.6506621567057	13.242245948987
ENSG00000071205.12_ARHGAP10	NA	10.4576747581423	9.58460464030787	10.1053573226067	9.53193865137498	10.3192151875193	9.9170106582774
ENSG00000071242.12_RPS6KA2	NA	12.045469825429	13.0158826887548	11.6782107349134	13.0336619314354	12.0459514589509	12.9606656502891
ENSG00000071243.16_ING3	NA	11.3765405668466	11.4747646451087	11.7261594665822	11.6275602988752	11.3092023625834	11.5069602339193
ENSG00000071246.11_VASH1	NA	10.9989167314386	11.3979817529653	10.4131390914608	11.3553103294666	10.7078456155648	11.2324339676394
ENSG00000071282.12_LMCD1	NA	8.70947085854377	8.82574731419423	8.63938643278495	8.66332830460109	8.51071980846989	8.6200175417066
ENSG00000071462.11_BUD23	NA	13.3371082006051	12.7712313666276	13.5710264685476	12.959084015143	13.6022507172685	12.9844508424387
ENSG00000071537.14_SEL1L	NA	14.2767608964879	14.8461411428788	14.0504547030329	14.8265281017034	14.0238381885833	14.859540161825
ENSG00000071539.14_TRIP13	NA	12.5509573874288	12.1202653733675	12.5107656592617	12.3984738113809	12.535464634959	12.315902447195
ENSG00000071553.17_ATP6AP1	NA	14.5085912262105	14.6840571418945	14.2784568516548	14.7350981157168	14.4134551060002	14.5841858070551
ENSG00000071564.16_TCF3	NA	14.4076645599192	14.6376127158003	13.9089114758781	14.8457326234212	14.4123791170762	14.494946793516
ENSG00000071575.11_TRIB2	NA	13.152757900256	13.1892474381022	12.9344988275542	13.2241593829176	13.0198837179668	13.1789470677774
ENSG00000071626.16_DAZAP1	NA	14.405257190937	14.0861079815159	14.1735352491721	14.1946915503925	14.368852862591	14.0672527846159
ENSG00000071655.18_MBD3	NA	14.2690414187619	14.4831867624457	13.6539341094561	14.6871408724665	14.153638532658	14.3759172121889
ENSG00000071677.1_PRLH	NA	-1	-1	1.39492385926443	-1	2.04098824485641	-1
ENSG00000071794.16_HLTF	NA	13.1666736846875	13.8737531865287	12.9341062825495	13.8650384878911	12.9996473565378	13.7584811032899
ENSG00000071859.15_FAM50A	NA	13.1079108138908	12.5276284074776	12.7036585085218	12.5061967294135	12.920286963991	12.4731417314406
ENSG00000071889.16_FAM3A	NA	11.7254857299095	11.6192452756453	11.7074464339997	11.663070390898	11.8294343957416	11.4430692339075
ENSG00000071894.17_CPSF1	NA	13.4350061635904	13.9963329870501	12.9206958010163	14.0545682546678	13.4403057008582	13.7714513419316
ENSG00000071909.18_MYO3B	NA	9.28958126698312	9.37829829215377	9.10879729471268	9.17909909256517	8.98995046159533	9.36500084597393
ENSG00000071967.12_CYBRD1	NA	12.450360887102	12.0680609289951	12.3505632628324	11.9442849270201	12.264702661071	12.0182163471968
ENSG00000071994.11_PDCD2	NA	13.2196276175578	12.9464816324853	13.4282298462188	13.0933692163727	13.2343700336776	13.098433450192
ENSG00000072041.17_SLC6A15	NA	10.1960766972549	10.7497776913746	10.865032055633	11.038266934891	11.0187308704581	10.8030788932134
ENSG00000072042.13_RDH11	NA	14.6890684904611	14.7486369442922	15.2700261160069	14.6574517687978	15.0206033658073	14.9750155127185
ENSG00000072062.14_PRKACA	NA	14.1129477311035	14.079381851006	13.6050839760443	14.1220443675535	13.8171410427605	14.0335274121712
ENSG00000072071.16_ADGRL1	NA	13.0961716525861	13.1255715611975	12.4085098067006	13.168811098314	12.9469532101053	13.3240111230708
ENSG00000072080.11_SPP2	NA	0.515145658870156	-1	1.39492385926443	0.559151537014313	1.20641608165016	1.7051978671648
ENSG00000072110.13_ACTN1	NA	14.3634507121733	14.2483435028373	13.7599511342145	14.3961608305671	14.1607754600398	14.3675252552107
ENSG00000072121.16_ZFYVE26	NA	12.4378523193489	13.0311354415368	11.7468696373938	13.0916006191059	12.0447174773713	12.8070432720631
ENSG00000072133.11_RPS6KA6	NA	3.54221607742052	3.63183436999618	2.54210121923842	3.60654045142147	0.489356241498477	1.22681122250844
ENSG00000072134.15_EPN2	NA	12.1232463697048	12.4958899660945	11.8268594925441	12.5844213873901	12.1390887466781	12.596383593012
ENSG00000072135.13_PTPN18	NA	12.7774751802139	12.4515368901308	12.4203295454469	12.3869834031316	12.5550977358696	12.630702090957
ENSG00000072163.19_LIMS2	NA	10.0683146041971	10.4321839363846	9.95868570062548	10.4414074150805	10.0197066912246	10.0779749268395
ENSG00000072182.12_ASIC4	NA	2.36336513754916	4.97408442595249	2.25080803793905	3.82044798456638	1.68322706982405	3.7423767631696
ENSG00000072195.15_SPEG	NA	10.6375697259634	10.6969935074155	10.3800893342883	10.5918428899573	10.6119557183369	10.364453766117
ENSG00000072201.14_LNX1	NA	9.28529096422282	9.75517020532113	8.80653935225699	9.68479255255137	8.63071279470424	9.32622973506386
ENSG00000072210.19_ALDH3A2	NA	15.3212304302661	15.1946459520149	14.9092874932321	15.2457341085289	15.0542582291562	15.3953452746301
ENSG00000072274.13_TFRC	NA	16.3285535788151	16.8204751460401	16.5437027784758	17.0311192904452	16.7165550536538	17.0343999743684
ENSG00000072310.17_SREBF1	NA	15.0541338283821	15.5518778029644	14.6888198585952	15.5907925840027	15.0409754420542	15.4329561911176
ENSG00000072315.3_TRPC5	NA	-1	0.756704934741344	-1	-1	0.489356241498477	0.506140336067499
ENSG00000072364.13_AFF4	NA	14.1646650635635	15.2408094014611	13.4581607223707	15.3494792698116	13.7741367983708	15.087240166253
ENSG00000072401.15_UBE2D1	NA	11.0093590853102	11.5636307827406	11.2324502655646	11.5888763772546	10.8934029830424	11.6035568276241
ENSG00000072415.9_MPP5	NA	13.4096083937186	13.8970029889974	13.1588672246338	13.9127129974195	13.1382858481216	13.7518557558242
ENSG00000072422.17_RHOBTB1	NA	10.1869060580127	9.79628543363603	10.117854644298	9.86726783463144	10.8152311096629	10.7631488734105
ENSG00000072501.17_SMC1A	NA	14.9738892642963	14.7762395189883	13.9198565118477	14.7898652946526	14.4041632415469	14.9395003716612
ENSG00000072506.12_HSD17B10	NA	13.9104724017871	13.4885290724527	13.9903663431597	13.4996020421314	14.0481345905863	13.6349305443571
ENSG00000072518.20_MARK2	NA	13.2118780206706	13.3654588771457	12.5573878882921	13.4492639682772	12.9248216039086	13.4384568023872
ENSG00000072571.20_HMMR	NA	13.9656404913404	13.7543874342113	14.9113828772105	13.7333727237422	14.3828367631374	13.5774431122944
ENSG00000072609.17_CHFR	NA	11.8241624637381	11.4269446633279	11.3861463630346	11.387118073086	11.5711612647261	11.6196786577791
ENSG00000072657.9_TRHDE	NA	8.83218693109299	8.43746706227379	7.31438956854828	8.23496757852587	7.25116499321287	7.83744429732945
ENSG00000072682.18_P4HA2	NA	12.5085690506062	11.9632171661785	12.072059901104	11.9662112696381	12.2945984220827	12.1231287810852
ENSG00000072694.20_FCGR2B	NA	-1	-1	-1	-1	1.20641608165016	0.506140336067499
ENSG00000072736.19_NFATC3	NA	12.4960931851318	13.1837243928302	11.8958088570555	13.31253257458	12.1982766573537	12.9939212971345
ENSG00000072756.17_TRNT1	NA	10.131818483201	10.1640277041957	10.3474443410664	10.3784478273012	10.176656197749	10.3684764984867
ENSG00000072778.20_ACADVL	NA	13.5514556427478	12.5351659855216	13.4057563458723	12.4334218285918	13.5085788778916	13.001874035507
ENSG00000072786.13_STK10	NA	11.4612266845166	10.7226116647384	10.7863186726708	10.543733600665	11.1253069635489	11.3160439181187
ENSG00000072803.17_FBXW11	NA	13.1986787022866	13.6479729365345	12.7614420145907	13.7225051186681	13.0884062150422	13.730916619805
ENSG00000072818.12_ACAP1	NA	6.48699246994377	5.72365671954267	6.54139066491873	5.40450483204493	6.49150062171498	5.42059333157581
ENSG00000072832.15_CRMP1	NA	9.71818934683812	10.1892367986419	9.41141370211447	10.000731541276	9.59144199328134	9.76203566794794
ENSG00000072840.13_EVC	NA	11.2429912580075	11.1265815175933	10.3474443410664	10.9796657393732	10.9198932268715	11.2368415973157
ENSG00000072849.11_DERL2	NA	12.7200249054815	12.8474959397179	13.0639253288284	12.8302227671024	12.7442840846829	12.7140764259956
ENSG00000072858.10_SIDT1	NA	4.82650540552672	4.4537341295815	4.97183447980234	4.38828951939807	4.68968567833438	4.85935391810039
ENSG00000072864.15_NDE1	NA	12.7222086904279	12.3914735311275	12.6489757087041	12.3634578658615	12.660362949129	12.5482096783588
ENSG00000072952.18_MRVI1	NA	1.23773309057468	2.02463226269727	2.54210121923842	2.42411916774553	0.489356241498477	1.7051978671648
ENSG00000072954.7_TMEM38A	NA	10.0570340730412	9.84934419008352	10.1958957564041	9.78847269582552	10.1493607610354	9.64917367315127
ENSG00000072958.8_AP1M1	NA	12.4651345778811	12.6324364030937	12.1215109033416	12.6579701504017	12.3302314905059	12.4792000151617
ENSG00000073008.15_PVR	NA	13.808681142941	13.860313886248	13.2433580060265	14.0787930857486	13.6934613866303	14.1294666585028
ENSG00000073050.11_XRCC1	NA	12.8869990185296	12.1390321770705	12.3940258487725	12.0036273547768	12.4622562989613	12.1204477687111
ENSG00000073060.16_SCARB1	NA	12.8556933340916	12.7329192455057	12.5985928208708	13.0064436962328	13.129873230432	13.3254345319018
ENSG00000073067.14_CYP2W1	NA	2.60284416365316	2.68888213318037	1.88542602307657	3.60654045142147	3.38432637629481	2.35084444806025
ENSG00000073111.14_MCM2	NA	14.8427222391435	14.8088357509059	14.1662002599757	14.8862228910813	14.559172935838	14.8440950154823
ENSG00000073146.16_MOV10L1	NA	2.98788607713756	5.62277558533674	3.17296538656624	6.01668709729579	1.20641608165016	5.97903514835657
ENSG00000073150.14_PANX2	NA	11.3835817040839	11.6811817285438	10.2970485921235	11.8868532268894	10.5584866912393	11.1020060367348
ENSG00000073169.14_SELENOO	NA	10.9910350637863	10.6161979876061	10.6619316084851	10.6835005977746	10.8879084427323	10.6999052202678
ENSG00000073282.13_TP63	NA	7.23859986699807	7.96763957773407	6.47385977793221	7.94132593253134	6.41715922279653	7.19789521619452
ENSG00000073331.18_ALPK1	NA	9.8240199071929	10.2496925359273	9.77800425622676	10.2202791485671	9.63964416306252	10.1322160075489
ENSG00000073350.13_LLGL2	NA	13.3206938333512	13.4106047077587	13.2189130041621	13.5549094856332	13.355015441282	13.3218085433659
ENSG00000073417.15_PDE8A	NA	11.4521652133262	11.8253018180001	11.0173259257439	11.89977402715	11.174089050432	11.7868097163391
ENSG00000073464.12_CLCN4	NA	11.5736822255114	12.0093241197136	11.0881927261146	11.9245512302297	11.3019902972768	11.927740642252
ENSG00000073536.18_NLE1	NA	12.3336763983649	11.4125358877554	12.1733197839988	11.4956610080385	12.5817174582231	12.5847602509851
ENSG00000073578.17_SDHA	NA	13.6630323830989	13.2558569000605	13.0680457974747	13.3663180706629	13.3133510146325	13.4185880449215
ENSG00000073584.20_SMARCE1	NA	14.6284389476261	14.3084521838997	14.6447592124261	14.2388688877506	14.5107280679424	14.4567252227552
ENSG00000073598.6_FNDC8	NA	3.85170670566739	3.48628246289959	4.29775785636771	3.35530167321461	5.00601257075044	4.09291939637801
ENSG00000073605.18_GSDMB	NA	8.95881094516082	10.2009491854484	9.4315768712147	10.1736212935495	9.54855525123998	9.79379294577828
ENSG00000073614.13_KDM5A	NA	13.5292911205586	13.8214823216552	12.5889002087306	13.7935546829498	13.0058432450303	13.8804907097453
ENSG00000073670.14_ADAM11	NA	8.45061761714073	8.09863350821507	8.44589877906417	8.12356842037078	9.11279607008552	8.43676279357731
ENSG00000073711.11_PPP2R3A	NA	10.7899482135686	11.7157801386606	10.277377456658	11.765043096861	10.3879728815797	11.3045422110696
ENSG00000073712.15_FERMT2	NA	12.7826208355877	12.6739984572273	12.7474350908447	12.7181885768254	12.6575402830923	12.8250851497891
ENSG00000073734.10_ABCB11	NA	0.515145658870156	-1	-1	-1	1.20641608165016	-1
ENSG00000073737.16_DHRS9	NA	0.515145658870156	-1	-1	-1	0.489356241498477	-1
ENSG00000073756.12_PTGS2	NA	8.72855700779185	10.5247948059715	9.45803008941847	10.9845256086896	9.48810473815306	10.8958843825234
ENSG00000073792.15_IGF2BP2	NA	12.3476317243854	12.3167400894989	12.0638301574028	12.3935232668552	12.5501057464863	12.7696979643124
ENSG00000073803.14_MAP3K13	NA	12.9915923979093	12.8574745354024	13.7342528251488	12.9215652830803	13.3928457328873	12.9908257486135
ENSG00000073849.15_ST6GAL1	NA	11.4626522547121	12.2923124654043	11.5564877921063	12.3589202573656	11.9257524985929	12.625248884674
ENSG00000073861.3_TBX21	NA	2.80817268973273	1.52569523028648	1.88542602307657	1.77408377862989	2.04098824485641	3.27834984296906
ENSG00000073905.8_VDAC1P1	NA	10.2029166226861	7.90457477600913	10.2308336344536	7.88303051078748	10.4591704467319	8.28754259738702
ENSG00000073910.22_FRY	NA	7.86285184388397	7.78516488450784	6.86506754948598	7.35783004798428	7.12606450780534	7.53503695318512
ENSG00000073921.18_PICALM	NA	13.785420535404	14.1429973191599	13.3334792931773	14.1738716786341	13.38348075144	14.061362815495
ENSG00000073969.18_NSF	NA	13.877096064445	13.7163845451826	13.2827387722136	13.7480429198662	13.4323067536134	13.8038400255866
ENSG00000074047.21_GLI2	NA	7.59813285624535	6.04285210515835	7.02696102996221	6.21875376735709	6.86032652139944	5.9999310146713
ENSG00000074054.18_CLASP1	NA	12.7987013148507	13.5147204696999	12.2591877582567	13.5307875507305	12.5617988551563	13.3329166417689
ENSG00000074071.14_MRPS34	NA	14.1851748737175	13.6410036538489	14.1288695190261	13.7533407662735	14.2636649179546	13.7137263240107
ENSG00000074181.9_NOTCH3	NA	14.0563991187496	13.8688284949755	13.3777404973193	13.9389707675916	13.6773279560667	13.4444240105855
ENSG00000074201.9_CLNS1A	NA	13.4722836655014	13.0090284457104	13.6213892938186	12.9951357922267	13.466921758113	13.1583286379492
ENSG00000074211.14_PPP2R2C	NA	12.1976144013201	12.6802876656673	11.695915769278	12.5960358602856	12.0941665274872	12.5643009132715
ENSG00000074219.13_TEAD2	NA	12.4525148644813	12.3351253458501	12.8845837567973	12.1963787170479	12.7700873635933	12.4412696367453
ENSG00000074266.21_EED	NA	12.0492701120244	11.7034818361092	12.2045768745777	11.7838837118079	11.9803423665841	11.8069586689842
ENSG00000074276.10_CDHR2	NA	5.0452614338161	5.98982566245203	4.58058051926203	6.4770235319412	5.45559944391865	5.84687490664973
ENSG00000074317.11_SNCB	NA	6.78317287898399	6.21445287653312	7.10715077456081	5.97264110587286	6.94742411575456	6.60178234381474
ENSG00000074319.13_TSG101	NA	12.624549820473	12.7205125270979	13.2844335286102	12.7542063019787	12.8905450637364	12.6572521630549
ENSG00000074356.17_NCBP3	NA	13.4752293757452	13.1246110349625	13.0321824592912	13.010874103132	13.1983386405643	13.5181354931199
ENSG00000074370.18_ATP2A3	NA	11.7927701653629	11.8841497191358	11.4004251062566	11.7774974699773	11.7161814680551	11.631025140508
ENSG00000074410.14_CA12	NA	6.97652044298729	5.84804960175097	6.72686476422288	6.50821354645103	8.56337193982474	8.03259526937269
ENSG00000074416.14_MGLL	NA	7.97897645397931	7.42463922816556	7.52087964665377	7.69929287300509	8.00665934985699	8.19543653512323
ENSG00000074527.12_NTN4	NA	9.18522395841732	8.50516164014496	9.07785929081333	7.87108333336757	8.66324003442111	8.36206499440407
ENSG00000074582.14_BCS1L	NA	11.8863862671322	10.5236293875519	11.8921758484116	10.5735286798105	12.0499546253463	11.6154535069134
ENSG00000074590.13_NUAK1	NA	12.5386189889851	13.1920010520031	11.7540040478448	13.3071390643768	12.1637382907771	13.0635001918769
ENSG00000074603.19_DPP8	NA	12.541544875161	12.7941262775183	11.9826438291089	12.7452346867154	12.1405334490488	12.865317749564
ENSG00000074621.14_SLC24A1	NA	10.9380440359014	10.5524860902559	10.3915715279353	10.2677552207524	10.4386475019279	11.0708680959854
ENSG00000074657.13_ZNF532	NA	12.4947002946655	12.8299245096935	11.9777004436423	12.783582266286	12.2933001127576	12.8050040071281
ENSG00000074660.16_SCARF1	NA	6.47197022792765	6.92886737263829	6.94205038513103	7.09567489673974	6.61636327149228	6.88620167988919
ENSG00000074695.6_LMAN1	NA	14.5556065146679	14.8352618411694	13.9983677549136	14.8432504447616	14.0555052636921	14.8743355490336
ENSG00000074696.13_HACD3	NA	14.915359207359	15.2642430516453	15.2147009557178	15.3789118261456	15.0285058729306	15.0740219296798
ENSG00000074706.13_IPCEF1	NA	4.38826155280896	6.09399845309518	4.13241017613544	5.95010334858076	4.52953725887794	6.39647362058023
ENSG00000074755.15_ZZEF1	NA	12.5558633514764	12.7753989392542	11.4794900227577	12.8854594314711	12.0511841374572	12.8331127688495
ENSG00000074800.16_ENO1	NA	17.4616284935334	16.8404300741973	17.2890738633331	17.0586622433926	17.5057349337322	17.2713640278148
ENSG00000074803.19_SLC12A1	NA	1.71695370984036	3.14198696342875	3.61041742401945	3.35530167321461	1.20641608165016	1.7051978671648
ENSG00000074842.7_MYDGF	NA	13.9829638288176	13.0711711980411	14.2025078711312	13.1605526966486	13.9307995135875	13.0508832088951
ENSG00000074855.11_ANO8	NA	10.7685919437196	9.3390865476288	10.6447617967494	9.12730568719641	10.925267516844	10.4158941917969
ENSG00000074935.14_TUBE1	NA	10.9013699082335	11.8732112517057	12.1673203082204	11.9041775102404	11.905841551446	12.3450303398555
ENSG00000074964.17_ARHGEF10L	NA	9.86340684709219	10.1877660418778	9.52211583322499	10.0359370330225	9.85910209899994	10.1521877843624
ENSG00000074966.11_TXK	NA	5.55326591186673	5.90644228634126	5.3563265242471	6.19977407597719	4.83381952276361	5.32447064736623
ENSG00000075035.10_WSCD2	NA	3.29151283071405	1.52569523028648	2.99170115686585	-1	2.04098824485641	1.22681122250844
ENSG00000075043.18_KCNQ2	NA	5.43430687748148	6.14339347423055	5.15545866518147	6.53874350045886	4.47194437098392	6.22958572785467
ENSG00000075073.15_TACR2	NA	4.77847218357551	5.02768193354761	4.58058051926203	5.15147276318625	4.73934757699469	4.24068908236424
ENSG00000075089.9_ACTR6	NA	11.8530756094447	11.5116761011196	12.3277333138558	11.4248950599506	11.8777042589948	11.6690305728828
ENSG00000075131.10_TIPIN	NA	11.8814206712726	11.8243556085893	11.8873175616606	11.9335545677415	11.8822018156885	11.9419827545206
ENSG00000075142.13_SRI	NA	13.1069994978113	12.8386198299611	13.7908473252427	12.8806259748493	13.5872845970468	12.9626627958982
ENSG00000075151.20_EIF4G3	NA	13.7478147580389	13.8991389962463	13.1638978573201	13.9583330956103	13.4928294550228	14.11472429198
ENSG00000075188.9_NUP37	NA	12.6858483119814	12.1549259662632	13.7423468417424	12.2426076701731	13.1744191883174	12.2339386666288
ENSG00000075213.11_SEMA3A	NA	15.5053228095898	15.5686787435917	15.4393571126156	15.5166414989838	15.2761547976286	15.5571921146238
ENSG00000075218.19_GTSE1	NA	13.110792856262	12.9889016456938	12.6611233480995	12.9161249175234	12.7910284410118	12.7717877138079
ENSG00000075223.14_SEMA3C	NA	12.2756538886956	11.7315118457463	11.9174168578182	11.3542378984824	11.6108916852563	11.426764947074
ENSG00000075234.17_TTC38	NA	12.4830402768736	12.0022294044771	12.1471399308878	12.1311941086145	12.386595357244	12.1745803076831
ENSG00000075239.14_ACAT1	NA	13.0772190391777	12.6453527238903	13.5914577321678	12.7376469488483	13.3546420425003	12.8055604562234
ENSG00000075240.17_GRAMD4	NA	11.7718393236588	12.184355144113	11.2863429225207	12.2094847022435	11.7806057579452	12.0909274079663
ENSG00000075275.16_CELSR1	NA	15.0568499507191	15.2973103809497	14.2800021988765	15.3057687737205	14.7651011982288	15.1441499738039
ENSG00000075290.8_WNT8B	NA	5.40296868726185	4.91841863361357	5.62889531317091	5.02778573487983	5.84399777048695	5.25663577326202
ENSG00000075292.19_ZNF638	NA	14.0364345823126	14.3302792826299	13.558219864043	14.3344162196103	13.7294272210091	14.2864646935876
ENSG00000075303.13_SLC25A40	NA	12.064684883443	12.6602770486784	12.7071088498846	12.6631756901187	12.4061861454429	12.6733979908141
ENSG00000075336.12_TIMM21	NA	11.961916739521	11.4915513705639	12.2338959143655	11.420803050676	12.0643356355671	11.9071477363885
ENSG00000075340.23_ADD2	NA	10.4461908483661	10.8064601116801	10.2384840308879	10.808567897833	10.6874322219798	11.2368415973157
ENSG00000075388.4_FGF4	NA	-1	2.39465370156298	0.646045912731413	-1	0.489356241498477	1.7051978671648
ENSG00000075391.16_RASAL2	NA	11.7400583792885	11.735040549995	11.0531944142905	11.5570714076321	11.395953081052	12.0486197128375
ENSG00000075399.14_VPS9D1	NA	10.2836377979264	10.218341386676	9.94939264292517	10.1038710079908	10.1355169091979	10.0254412377181
ENSG00000075407.18_ZNF37A	NA	11.9244733197433	12.5035947569522	10.8542839469386	12.4757024484542	11.2864133878419	12.685944047701
ENSG00000075413.18_MARK3	NA	13.1120046274623	13.1962130785593	12.9942755915099	13.2884523326595	12.9646782634274	13.2207118465387
ENSG00000075415.12_SLC25A3	NA	16.0078202839836	16.1212455421949	16.3819689581213	16.1939510283381	16.2272681484531	16.1180203236677
ENSG00000075420.13_FNDC3B	NA	13.362530711205	13.6489085433724	12.6736399135015	13.6971416487066	12.9666343381196	13.907438939301
ENSG00000075426.12_FOSL2	NA	10.4346147922333	9.98254172092524	9.80401604010309	10.1796880748355	10.2566405992363	10.6437540128755
ENSG00000075429.8_CACNG5	NA	3.29151283071405	0.756704934741344	1.39492385926443	1.77408377862989	2.32742628316446	2.5901164547137
ENSG00000075461.6_CACNG4	NA	9.59186804849503	8.56982168774292	9.42712045712806	8.10838274453142	9.36101366420714	8.78259646143202
ENSG00000075539.14_FRYL	NA	12.5525201863578	12.8874558554403	11.9773194807024	12.8763366842881	12.1753431952578	12.7928946058529
ENSG00000075568.17_TMEM131	NA	13.2405537165062	13.4733678250796	12.5321916884938	13.5728839553992	12.9459620704878	13.711451721992
ENSG00000075618.18_FSCN1	NA	11.000226166586	11.2842217648824	10.6826431692713	11.6943413036223	11.1017671595896	11.3525497026447
ENSG00000075624.16_ACTB	NA	18.8421060392923	18.9386621890581	18.6219013775881	19.0724516244916	18.836665404441	18.9919511226153
ENSG00000075643.6_MOCOS	NA	9.43416738063901	9.53225479960458	9.3538795577696	9.4718994829127	9.25829514930013	9.73891613067615
ENSG00000075651.16_PLD1	NA	10.5017933454818	10.2111200995855	10.1302446372171	9.93051447867479	10.048311476539	10.0267145298264
ENSG00000075673.11_ATP12A	NA	7.29943144405517	6.90041662264981	7.44355989469232	6.18054136069053	7.3016277787768	6.95201779730115
ENSG00000075702.18_WDR62	NA	12.3779167586796	12.8876823410125	11.9735043081441	13.1199567828593	12.4128968650895	12.6488009129328
ENSG00000075711.21_DLG1	NA	13.7985566218192	14.1762883246063	13.5939448229511	14.3023848196934	13.63634055776	14.2151001861267
ENSG00000075785.12_RAB7A	NA	14.6715052752577	14.5347856370375	14.6237359350398	14.6598950813934	14.6316966800407	14.6202163004816
ENSG00000075790.10_BCAP29	NA	12.5188838202373	12.2531207133063	12.7938218485921	12.0811885645751	12.4560038921571	12.4462739990481
ENSG00000075826.17_SEC31B	NA	8.33499292298854	9.26011504478667	8.57638859547897	9.10197298307966	8.79824048444314	8.99784633976617
ENSG00000075856.12_SART3	NA	13.6451473390969	13.6879261186715	12.9407650650513	13.7397515542722	13.2942670476957	13.739192860349
ENSG00000075884.14_ARHGAP15	NA	-1	-1	-1	-1	1.20641608165016	-1
ENSG00000075886.11_TUBA3D	NA	4.5109190264711	4.10053874497786	4.64339949666533	4.51653564172377	4.6382531359428	3.83831471953006
ENSG00000075891.21_PAX2	NA	3.14767234200784	1.52569523028648	3.17296538656624	2.13540673558656	-1	3.52893957787693
ENSG00000075914.13_EXOSC7	NA	11.8750111170248	11.3289407414012	11.9902161156107	11.5387795966997	12.053640022645	11.5954278459979
ENSG00000075945.13_KIFAP3	NA	11.693060096969	11.7898720445591	11.4950089516629	11.7726891681236	11.3690915068265	11.4577760067678
ENSG00000075975.16_MKRN2	NA	12.5702615407837	11.9934168994103	12.2880428099613	11.9531663278054	12.327697134903	12.3773296452933
ENSG00000076003.5_MCM6	NA	14.3482993278698	13.9612535532239	14.0649592802716	14.0621412524178	14.1439473326162	14.2052937792885
ENSG00000076043.10_REXO2	NA	12.8630889760261	12.6204939901336	12.8568938715513	12.7052091792307	12.7189782204094	12.7178257159334
ENSG00000076053.10_RBM7	NA	12.4644231942382	13.3953939868552	12.9599806584645	13.4487616595895	12.5973725132295	13.1332798041594
ENSG00000076067.13_RBMS2	NA	12.6074675589041	12.4457033706464	12.214308479247	12.3049917736757	12.2652325227772	12.8546026866137
ENSG00000076108.11_BAZ2A	NA	14.5374574332808	14.6437940472457	13.7155309539232	14.5469225470111	14.1759308865688	15.0910109698266
ENSG00000076201.15_PTPN23	NA	13.2812474910299	13.1454068746518	12.5181176972113	13.2839537974824	12.9212958942217	13.2675080849529
ENSG00000076242.14_MLH1	NA	11.1721466329254	11.2366503986305	11.4229811602816	11.2496939126646	11.2552792787536	11.2340884072054
ENSG00000076248.10_UNG	NA	13.9013903259765	13.3555046253661	13.7046404484452	13.4906015231139	13.721147220107	13.5052907830737
ENSG00000076258.10_FMO4	NA	6.87739385392647	7.08870871510341	7.15104858860009	6.72284117932979	6.81472308921909	6.75713960692179
ENSG00000076321.11_KLHL20	NA	11.535808637861	11.6643596826014	11.3981499827947	11.7286777158933	11.3803854327846	11.7104249990103
ENSG00000076344.16_RGS11	NA	8.79946718269085	10.0488521696778	9.45584408653381	9.91022539151665	9.77676821077532	9.85671687485209
ENSG00000076351.13_SLC46A1	NA	12.346345220618	12.4258782465138	11.877959866422	12.4605839127546	12.3726480174057	12.8445296470273
ENSG00000076356.7_PLXNA2	NA	7.93583336890885	7.63784015174691	6.66765046700453	8.01375058371617	6.79136915835971	7.65845261698778
ENSG00000076382.17_SPAG5	NA	14.2577948224098	14.2173231643193	13.6698174083072	14.2244885457282	13.9037451123762	14.0964230389466
ENSG00000076513.17_ANKRD13A	NA	12.4330123053732	12.6797646108679	11.9066533113547	12.6369581068493	11.9935131986256	12.5034105769618
ENSG00000076554.15_TPD52	NA	13.4184506181005	13.9717604143181	13.2822762201938	13.9265781890528	13.2065003818776	14.0843976840297
ENSG00000076555.15_ACACB	NA	11.7509893054324	11.9217941544384	11.10851301112	11.6951885737997	11.3867300634242	11.8183997753741
ENSG00000076604.15_TRAF4	NA	13.5529063684433	13.4297064374971	13.5101772518885	13.611544564526	13.5922553814111	13.4950930266323
ENSG00000076641.4_PAG1	NA	8.35560095731564	8.71982692409612	7.44355989469232	8.92548862366288	7.873991224993	8.62675057217263
ENSG00000076650.7_GPATCH1	NA	10.4906566444308	9.41647242038881	9.96638444857743	9.02588786790957	10.0811829552118	9.63254382931781
ENSG00000076662.10_ICAM3	NA	10.407237205381	9.46098676270579	10.8350696668596	9.5185981560179	10.7984897032512	9.88507422224585
ENSG00000076685.18_NT5C2	NA	13.5321228140202	13.8039492381051	13.6698174083072	13.7209458992418	13.5257069459314	13.6642698620366
ENSG00000076706.17_MCAM	NA	10.666723844346	10.2009491854484	10.4142653439358	10.2563189387779	10.4957529806066	10.2995699007285
ENSG00000076716.9_GPC4	NA	12.6672155610453	12.5683235157707	12.3920264570074	12.529186411643	12.7071321763078	12.8245361820841
ENSG00000076770.14_MBNL3	NA	11.4353225656713	11.4231997039594	10.915218670598	11.4990612853132	11.143866115495	11.9284220357125
ENSG00000076826.9_CAMSAP3	NA	11.8348435819382	11.8667919682116	11.2590215060492	11.9871176653914	11.7304502177001	11.7128001037653
ENSG00000076864.19_RAP1GAP	NA	11.9646023616849	11.5681596941633	10.8927696791986	11.5566052723543	11.1380919860436	11.3295196716084
ENSG00000076924.12_XAB2	NA	12.8544268658648	12.978306665791	12.3411193242355	12.9495291385337	12.689079987936	12.8164605637896
ENSG00000076928.17_ARHGEF1	NA	12.5812401088531	11.3442045463668	11.9042504673745	11.3520906419642	12.3460963638431	11.9126679826176
ENSG00000076944.16_STXBP2	NA	12.622850667456	12.8897191127545	12.0766908128806	12.811590844809	12.4028190435704	12.6973828503793
ENSG00000076984.17_MAP2K7	NA	12.661019772414	12.9360073829288	12.2242959801644	13.0396783825846	12.569112856093	12.8212379819032
ENSG00000077044.10_DGKD	NA	11.6987168791394	12.3991196328001	11.10851301112	12.5627662042849	11.6187910667968	12.3941989857689
ENSG00000077063.11_CTTNBP2	NA	10.7113793645799	11.2780148958171	9.78324426772146	11.3633282515754	9.78713613386355	11.0346198206823
ENSG00000077080.10_ACTL6B	NA	-1	-1	1.39492385926443	0.559151537014313	1.20641608165016	1.7051978671648
ENSG00000077092.19_RARB	NA	8.23175740114363	8.62302765759996	8.50629495239738	8.28084210709236	8.27428900114363	7.95446411846107
ENSG00000077097.15_TOP2B	NA	14.9074424583973	14.9264896940245	14.1639422550579	14.9984198863698	14.4416802713927	15.1504058624172
ENSG00000077147.16_TM9SF3	NA	11.3356326185017	12.438300837898	10.9986762637181	12.5218026336977	11.0212425779562	12.2582618047275
ENSG00000077150.20_NFKB2	NA	11.6411254520027	12.3476923968079	11.1050298702185	12.938480113917	11.4864425569219	12.7079381680015
ENSG00000077152.11_UBE2T	NA	13.0308825886712	12.7382039221018	14.2155680839875	12.80552252333	13.5837842093213	12.7960715084358
ENSG00000077157.22_PPP1R12B	NA	10.8601378630859	11.7055388473677	10.2435618494488	11.7726891681236	10.4885103077512	11.5133326861268
ENSG00000077232.18_DNAJC10	NA	14.8371001024578	14.7929622549703	14.5402477316631	14.6887902133945	14.553598718812	14.9887190169975
ENSG00000077235.18_GTF3C1	NA	14.1947854468527	14.3836051624576	13.2908861657732	14.4120304319784	13.8493907567421	14.4599689526266
ENSG00000077238.14_IL4R	NA	10.8886994059204	10.7774197714329	10.6293262828589	10.9782741930534	11.6249970113835	11.9812599093515
ENSG00000077254.14_USP33	NA	14.1410427960926	14.2754258095657	14.4927259288434	14.2048411609319	14.2609443600736	14.1483799984411
ENSG00000077264.15_PAK3	NA	9.15262129999325	9.77293468583684	8.57638859547897	9.81521877295585	8.69819281394567	9.24978255211993
ENSG00000077274.9_CAPN6	NA	12.0959478546769	12.2520655769313	11.7202523038515	12.1264907005463	11.8114074729861	12.0976072055341
ENSG00000077279.18_DCX	NA	1.71695370984036	0.756704934741344	-1	1.29089905871014	2.32742628316446	2.35084444806025
ENSG00000077312.9_SNRPA	NA	13.7961085887494	13.5616078704614	13.609884360374	13.6482120448155	13.6461378014121	13.7741072712826
ENSG00000077327.16_SPAG6	NA	5.12425044066259	5.78719342989303	5.91008283192396	5.97264110587286	6.07430325072767	5.18545328327316
ENSG00000077348.9_EXOSC5	NA	11.2014726043371	10.9434913348526	11.5349045403596	11.173308976005	11.6923447586345	11.2246880641162
ENSG00000077380.15_DYNC1I2	NA	12.7348491985089	12.4114587628468	13.0384045556888	12.3262041528319	12.82233107316	12.5603498511559
ENSG00000077454.16_LRCH4	NA	11.7239014552821	12.1047624606678	11.4123109945566	12.0792427075507	11.5711612647261	11.8209707419094
ENSG00000077458.13_FAM76B	NA	11.3397760075739	11.8038605430057	11.6949893225286	11.7718862241452	11.3316369507675	11.5554053157607
ENSG00000077463.15_SIRT6	NA	10.9850954264522	11.9670804720498	10.8384297164207	12.128373904233	11.0124324036642	11.2791246842715
ENSG00000077514.9_POLD3	NA	12.2353558793813	11.7683856788118	12.2750829139173	11.7274358024291	12.1902076436778	11.8647025984815
ENSG00000077522.13_ACTN2	NA	5.46497878749973	5.26933502097573	5.39334965148107	4.93901380891317	5.99474450130931	5.48129197217545
ENSG00000077549.18_CAPZB	NA	14.2799988862271	14.25151476189	14.269149844757	14.3026628155208	14.3195150817242	14.3067841730919
ENSG00000077585.14_GPR137B	NA	10.6000626495129	10.9625380014751	10.9176033310643	10.9537023140441	10.810882480969	10.8641839356381
ENSG00000077616.11_NAALAD2	NA	4.72878449711598	6.28217596099559	4.70359691329247	6.36222097206601	4.58491900581844	5.77595878310884
ENSG00000077684.16_JADE1	NA	12.6190202404444	12.8881352055183	12.0652647936586	12.8396408565489	12.2414632709523	12.8690492991451
ENSG00000077713.19_SLC25A43	NA	10.6467960909105	10.5490536075168	10.6137238354803	10.7230863422342	10.6627095435621	10.9083720630909
ENSG00000077721.16_UBE2A	NA	13.6659230313819	13.66894460053	13.830090111944	13.6055858001511	13.5631403929357	13.494172833621
ENSG00000077782.20_FGFR1	NA	12.6489652684134	11.6398290872008	12.6331018540994	11.8625460563633	13.1301641387964	13.0642754139924
ENSG00000077800.13_FKBP6	NA	3.14767234200784	3.63183436999618	2.78434487607049	2.66457719062308	3.8132450374244	2.97488976375032
ENSG00000077935.17_SMC1B	NA	6.98712556896225	7.87563602874127	6.83846587081992	7.82227997540887	6.41715922279653	6.86357839465356
ENSG00000077942.19_FBLN1	NA	12.4778798626051	12.1344587470105	12.4680197291794	12.4734817835675	13.2225502256243	13.0758540343366
ENSG00000077984.6_CST7	NA	0.515145658870156	-1	0.646045912731413	-1	-1	-1
ENSG00000078018.19_MAP2	NA	13.2097572495378	12.9827660380892	12.5921383202707	12.9248196821386	12.0722299309712	12.7895231840471
ENSG00000078043.16_PIAS2	NA	12.2425658503944	12.218607558289	12.3414153849916	12.2434767612132	12.3144462359429	12.5070643917083
ENSG00000078053.17_AMPH	NA	9.97683051427387	9.02338586050773	9.3632406048958	8.570337508146	9.45504568275575	9.20324306458238
ENSG00000078061.13_ARAF	NA	12.8199904750726	13.1132282646784	12.5667874642132	13.0718385041192	12.8053080390177	13.0259501589071
ENSG00000078070.13_MCCC1	NA	12.9406696737899	12.7731940770325	12.899338324655	12.6494708825455	12.6388526653163	12.4691667461957
ENSG00000078081.8_LAMP3	NA	10.8273154032969	12.1825102276864	10.9247337533576	11.9846941389814	10.9656011480813	12.0697742365765
ENSG00000078098.14_FAP	NA	0.515145658870156	0.756704934741344	-1	0.559151537014313	0.489356241498477	-1
ENSG00000078114.18_NEBL	NA	11.6093003631129	10.3595830917097	9.84133784821815	10.0545439020565	9.58975077965986	10.2272063552909
ENSG00000078124.12_ACER3	NA	12.2912491794403	12.8512169730085	11.9090521599926	12.9884119494234	12.0316965446947	12.8957746369119
ENSG00000078140.14_UBE2K	NA	14.3212480497004	14.8783522858066	14.1353722149198	14.9408690123822	14.1554260771653	14.8787050760285
ENSG00000078142.13_PIK3C3	NA	11.7995548289493	11.9301744512174	11.9367479224915	11.8775527178984	11.7045077077767	11.6167223519496
ENSG00000078177.14_N4BP2	NA	10.5374051211086	11.0670294471881	9.92904994669243	11.002434564558	9.88828907028321	11.1289334505434
ENSG00000078237.7_TIGAR	NA	12.6138971329491	13.0561365578334	12.3244421996747	13.0741200860013	12.2398466708712	12.8022185377456
ENSG00000078246.17_TULP3	NA	13.2487021870182	13.617435480522	12.9762771207621	13.634474095923	13.0295845924733	13.4597063835779
ENSG00000078269.15_SYNJ2	NA	10.9139300996741	10.8442930346337	10.3043566641905	10.8233687855144	10.7256659483468	11.1471953337968
ENSG00000078295.17_ADCY2	NA	1.23773309057468	-1	2.54210121923842	1.77408377862989	2.04098824485641	0.506140336067499
ENSG00000078304.19_PPP2R5C	NA	14.043120172215	14.1348155289167	14.4060062086094	14.1834891694393	14.1521352817592	14.0609744731844
ENSG00000078319.9_PMS2P1	NA	10.3039271272157	9.76703746354911	11.2752284445717	9.59866359377967	10.699244404292	9.66887971268586
ENSG00000078328.21_RBFOX1	NA	1.71695370984036	0.756704934741344	4.04204020973965	1.29089905871014	2.56630615203523	1.7051978671648
ENSG00000078369.18_GNB1	NA	16.0437430907483	16.1275640032668	15.6365956452479	16.170057301857	15.882476012881	16.2283960139223
ENSG00000078399.18_HOXA9	NA	7.32473688918808	7.6719036509904	7.32400952465527	7.52726634300917	7.15380003766317	7.34396923349802
ENSG00000078401.7_EDN1	NA	4.87299080009219	5.39701401244114	5.15545866518147	5.75587926002563	5.62369685858435	6.17550762164631
ENSG00000078403.17_MLLT10	NA	11.6615449951798	11.6712173123635	11.7083649182132	11.7187123446158	11.625822457311	11.7804078425397
ENSG00000078487.17_ZCWPW1	NA	7.54169823525847	8.24723887518356	7.00320647154523	7.86507243750895	6.89360733857277	7.44647460532324
ENSG00000078549.14_ADCYAP1R1	NA	6.45678991759401	4.37320703977514	6.28975619807278	5.56142747981494	7.48748657726463	6.85213231042968
ENSG00000078579.9_FGF20	NA	3.85170670566739	3.88513758306847	4.51490120850092	4.1716266919799	4.28393546044417	3.52893957787693
ENSG00000078589.13_P2RY10	NA	-1	-1	-1	1.29089905871014	0.489356241498477	-1
ENSG00000078596.11_ITM2A	NA	10.4268454943847	10.0226925798462	11.5942440564945	9.98557434515071	11.0504321719686	10.0619179633682
ENSG00000078618.21_NRDC	NA	14.3664366022285	14.4681961561928	13.9234205644433	14.5077323256955	14.0943410083803	14.4923569904982
ENSG00000078668.14_VDAC3	NA	14.8407592665943	14.3139399957039	15.6234477764508	14.3837981690537	15.196059656732	14.3544648446871
ENSG00000078674.17_PCM1	NA	14.1095392585324	14.4711463114639	13.4506331029261	14.5527775265006	13.686851677582	14.4370483259541
ENSG00000078687.17_TNRC6C	NA	11.3397760075739	11.7874464661385	10.4074946029314	11.8523275911627	10.8664172222655	11.8312090354134
ENSG00000078699.21_CBFA2T2	NA	11.837409978402	12.5159546850344	11.4512379421212	12.5569517039778	11.6780901447922	12.29755911444
ENSG00000078725.13_BRINP1	NA	3.14767234200784	2.93315015163294	0.646045912731413	1.77408377862989	2.04098824485641	2.5901164547137
ENSG00000078747.15_ITCH	NA	12.6452036428603	12.8701380760988	12.4164003823807	12.8607510224311	12.4643344274887	13.01026600262
ENSG00000078795.16_PKD2L2	NA	5.33817308626533	5.4762587063889	5.85805963571011	5.61971002982966	5.00601257075044	4.94804485599476
ENSG00000078804.13_TP53INP2	NA	10.5922691382559	12.4530681144824	10.1932737929852	12.2298004829042	10.2362458246127	11.5443350047475
ENSG00000078808.17_SDF4	NA	14.4203753205296	14.1637187173556	14.1825692325396	14.2862390025224	14.383569016575	14.1935082829829
ENSG00000078814.15_MYH7B	NA	5.12425044066259	4.4537341295815	5.15545866518147	5.07020395390465	5.42557549434371	4.76485140587716
ENSG00000078900.15_TP73	NA	10.9325677059574	11.1265815175933	10.3938570410469	11.173308976005	10.7379341423309	11.2488936015788
ENSG00000078902.16_TOLLIP	NA	12.891945484224	12.6007360745512	12.4696457685692	12.7964706149996	12.7978197201123	12.8540648387367
ENSG00000078967.13_UBE2D4	NA	12.0147016814533	10.9608168397686	12.2950908699918	10.8155977760224	12.1534710782884	11.9842121903808
ENSG00000079101.16_CLUL1	NA	8.44293425119597	8.24723887518356	9.55720609597925	8.05129304562828	8.92704979161969	7.69094078013319
ENSG00000079102.16_RUNX1T1	NA	3.14767234200784	4.4537341295815	2.99170115686585	4.1716266919799	3.71737006492186	4.61036834986522
ENSG00000079112.10_CDH17	NA	-1	-1	-1	-1	0.489356241498477	0.506140336067499
ENSG00000079134.12_THOC1	NA	11.9422950127054	11.9593434872101	12.0816613806075	11.9808774957486	12.0043448836139	11.9466990520542
ENSG00000079150.18_FKBP7	NA	10.8368743939354	10.9736757784142	11.5019118893075	11.0614510929919	11.1802831723085	10.8383123081323
ENSG00000079156.17_OSBPL6	NA	10.5201655773631	10.8311640672337	10.4410349533902	11.1124506813406	10.7156206474316	11.6201004930925
ENSG00000079215.14_SLC1A3	NA	13.4303994426571	12.6040479085152	12.9682477571229	12.5035389478648	12.7639140388372	12.1195529896151
ENSG00000079246.16_XRCC5	NA	16.0012957042409	15.7689604288375	15.9670422044729	15.84784117855	15.9790045520854	15.8998235235322
ENSG00000079257.8_LXN	NA	9.89753695485891	9.312340495216	10.6273851798355	8.70766850803752	9.76332759573863	9.17595910213457
ENSG00000079263.19_SP140	NA	1.23773309057468	0.756704934741344	2.25080803793905	-1	1.20641608165016	-1
ENSG00000079277.21_MKNK1	NA	12.943565271607	12.7598936683196	12.6773972583624	12.7513577443006	12.6559248480614	12.6490076310995
ENSG00000079308.19_TNS1	NA	11.1188945251466	10.9417472856327	10.3450840444436	10.6260121061648	10.6359178277353	10.9364190731649
ENSG00000079313.15_REXO1	NA	11.2790395078757	11.4479844135444	10.727731934855	11.6262281759972	11.2009249081229	11.4737354796919
ENSG00000079332.15_SAR1A	NA	14.6279096064023	14.3562069118702	14.7988750130894	14.439657606271	14.5789144722266	14.5423998789241
ENSG00000079335.20_CDC14A	NA	10.1222287556245	10.1936400940908	10.2282744603584	9.95335791343773	10.0751518809601	10.1404731907406
ENSG00000079337.16_RAPGEF3	NA	9.75278279912552	9.19132314039398	9.47539988451355	9.53950676940826	9.66877242219339	10.091423382433
ENSG00000079385.22_CEACAM1	NA	3.75573554863011	4.10053874497786	4.29775785636771	3.60654045142147	3.61466723687667	4.4973499934803
ENSG00000079387.14_SENP1	NA	13.1001462161068	13.5058951981742	12.644423837703	13.5357625647946	12.7612870509494	13.2894210820237
ENSG00000079393.20_DUSP13	NA	2.07606432475589	3.99685448657254	3.61041742401945	2.87062454522425	2.95057042569612	3.83831471953006
ENSG00000079432.7_CIC	NA	13.0551820859118	13.5706641705549	12.3121087483392	13.6785184368199	12.8038499525131	13.3020954417104
ENSG00000079435.10_LIPE	NA	10.0367593893151	9.68809575793303	9.50952440233769	9.5300404022765	9.70359302439594	9.68671013381266
ENSG00000079459.13_FDFT1	NA	15.6839712080277	15.6384063378872	16.249714918969	15.6672404018959	16.0459649858723	15.731487011695
ENSG00000079462.7_PAFAH1B3	NA	13.1024342625118	13.2584863825847	13.3942442515917	13.3218886833764	13.3817714769521	13.0049459937067
ENSG00000079482.13_OPHN1	NA	11.6808632126766	11.5715470720529	11.3245828357031	11.3227854659125	11.4468201830129	11.6928870508003
ENSG00000079616.12_KIF22	NA	13.8871283606909	13.7587277050069	13.5101772518885	13.7669039173623	13.6232765415699	13.6755767517683
ENSG00000079691.18_CARMIL1	NA	11.330957037501	11.1165676847394	10.9302553749025	11.2039927964344	11.0892532727797	11.2467098034201
ENSG00000079739.17_PGM1	NA	14.1451177819498	12.8470301350151	13.919559109649	12.6891379828387	13.9469900996882	13.4661732197538
ENSG00000079785.15_DDX1	NA	14.234965624953	12.9914329048024	13.9442321377033	12.9201165237125	13.9762494664116	13.7677438447715
ENSG00000079805.16_DNM2	NA	14.4932703480106	14.2577488318884	13.9472503354706	14.3058559232912	14.2827627910694	14.3887238213293
ENSG00000079819.19_EPB41L2	NA	13.6398013151618	13.3687076720498	13.4226442058119	13.851041283806	14.3027084530962	14.5158396143691
ENSG00000079841.18_RIMS1	NA	7.58422980926784	8.14787276213834	6.57400655729131	8.21620138293195	6.64270179924245	8.01217052077487
ENSG00000079931.15_MOXD1	NA	12.2381332109737	11.5338411532618	12.244382580753	11.4995463856585	12.1705427288459	11.8069586689842
ENSG00000079950.14_STX7	NA	12.666390991655	12.8176147913651	13.5354987151489	12.7188136601082	13.0403045844444	12.6933795557756
ENSG00000079974.17_RABL2B	NA	11.6611311457049	11.6748964249266	11.9445643140642	11.7082580283786	11.8804736450815	11.8147190000879
ENSG00000079999.14_KEAP1	NA	14.0256245512565	13.9054162620906	13.3644001992305	13.9420969627054	13.6144663547179	13.9182846754835
ENSG00000080007.8_DDX43	NA	10.0265141890035	10.3931530595366	9.90361248828388	10.255170308663	9.897888302016	10.1131630727377
ENSG00000080031.10_PTPRH	NA	3.14767234200784	3.88513758306847	2.25080803793905	3.21110909091156	2.56630615203523	3.92826874483634
ENSG00000080166.16_DCT	NA	2.07606432475589	3.88513758306847	2.25080803793905	3.05088813838361	2.95057042569612	3.52893957787693
ENSG00000080189.15_SLC35C2	NA	11.7533209103397	11.88051277056	11.628128183761	11.7870662628977	11.6828573491396	11.7610299880345
ENSG00000080200.10_CRYBG3	NA	11.3121016946978	11.3020041603405	10.4165152146563	11.1580261351125	10.8594157147748	11.8496726869216
ENSG00000080224.17_EPHA6	NA	9.84165809724485	9.18838438324648	10.4564242035652	9.28419382965212	10.2329990772798	9.68671013381266
ENSG00000080293.9_SCTR	NA	2.98788607713756	-1	1.39492385926443	1.77408377862989	1.68322706982405	0.506140336067499
ENSG00000080298.15_RFX3	NA	12.0959478546769	13.004023008103	12.1225448538439	13.0289650611773	12.1526121698642	12.946439495339
ENSG00000080345.18_RIF1	NA	13.329445352629	13.9814487409556	12.5301152963794	14.0393853561825	12.8058544417574	13.9899656912695
ENSG00000080371.6_RAB21	NA	12.8993335281683	13.5554910821357	12.3381553703029	13.5983573524258	12.4597122921965	13.520171035102
ENSG00000080493.17_SLC4A4	NA	8.02601852616443	7.90457477600913	7.22479538114556	7.43289455052342	7.48748657726463	8.23563267593051
ENSG00000080503.24_SMARCA2	NA	13.2203300665363	13.4050776906075	12.4121786559562	13.2885926861106	12.4822205759191	12.9566630458448
ENSG00000080511.5_RDH8	NA	-1	-1	0.646045912731413	1.29089905871014	-1	-1
ENSG00000080546.13_SESN1	NA	10.4605315090337	10.5456129386803	10.8534538431606	10.6585221738605	10.6795033597434	10.6716958835064
ENSG00000080561.13_MID2	NA	8.90669649819169	8.59222978138651	8.08203103560918	8.71102350769919	8.50714039078893	9.11740424871277
ENSG00000080572.12_PIH1D3	NA	5.304650257706	5.58751761179585	7.39874361889784	4.57662241946427	6.49150062171498	4.61036834986522
ENSG00000080573.7_COL5A3	NA	2.60284416365316	2.39465370156298	-1	3.05088813838361	-1	-1
ENSG00000080603.17_SRCAP	NA	12.7799550090631	13.3377104772635	11.5887679242274	13.4940137318699	12.28783441886	13.4579376584713
ENSG00000080608.10_PUM3	NA	12.4264524227413	12.235433557436	12.1204762112963	12.5069207299692	12.4797115615399	12.7258832423294
ENSG00000080618.16_CPB2	NA	2.07606432475589	0.756704934741344	1.39492385926443	2.13540673558656	1.20641608165016	1.22681122250844
ENSG00000080644.16_CHRNA3	NA	8.02601852616443	7.07604456035661	7.56210948684653	7.12615257064637	7.67142871168953	7.79622892537804
ENSG00000080709.15_KCNN2	NA	7.39809426456322	5.17747196015812	7.03869322802181	5.59086304992406	7.05919619526824	6.70718989152012
ENSG00000080802.18_CNOT4	NA	11.6101582068634	11.5286222282307	11.1278647027525	11.5029375285751	11.3311309289748	11.726969200738
ENSG00000080815.19_PSEN1	NA	13.5245213275862	13.8009461050163	13.341197854439	13.7771433058742	13.3199967090273	13.5795051841433
ENSG00000080819.9_CPOX	NA	12.2612540915481	11.3389136937677	12.0741990922549	11.2640405623227	12.1608936089824	12.0210940366856
ENSG00000080822.17_CLDND1	NA	13.0110465134285	13.7029335463651	13.8278731743361	13.7909810066076	13.4638090351154	13.5091676052758
ENSG00000080823.23_MOK	NA	11.1219051107141	11.359308548557	11.6493271718023	11.3675863259274	11.5814096830421	11.4009761593292
ENSG00000080824.18_HSP90AA1	NA	17.9482652429431	17.8729862084984	17.5001015629751	18.126086468716	17.7924182666358	17.9660690159299
ENSG00000080839.12_RBL1	NA	11.6050034763755	11.3188983686067	11.323983702268	11.1118162546051	11.3656366021798	11.8366640933945
ENSG00000080845.17_DLGAP4	NA	12.1927549494521	13.1223031594548	11.833610002383	13.1017006325302	12.1222236115556	12.7546001640544
ENSG00000080854.15_IGSF9B	NA	4.6239604202995	2.39465370156298	4.44608860764274	3.21110909091156	4.6382531359428	4.43733738831633
ENSG00000080910.13_CFHR2	NA	1.23773309057468	-1	0.646045912731413	-1	1.68322706982405	-1
ENSG00000080947.15_CROCCP3	NA	7.37405388378029	8.1296044121551	7.38961084643946	7.99735699386197	7.65211120306833	7.18882410479246
ENSG00000080986.13_NDC80	NA	13.195109806747	12.845864964855	13.1707448090812	12.7988374633197	13.0050503858086	12.7207788143507
ENSG00000081014.11_AP4E1	NA	11.5112208264943	11.7106685805053	10.8375904373943	11.6495831509318	11.0928397587427	12.0047107082837
ENSG00000081019.13_RSBN1	NA	11.5185498916852	12.1191084159859	11.579761900508	12.2259946804666	11.5080931774032	11.9614221170491
ENSG00000081026.19_MAGI3	NA	11.0951938224418	11.1837725160306	10.5567272664702	11.2087472787481	10.6408262016665	11.159436241747
ENSG00000081041.9_CXCL2	NA	2.60284416365316	3.48628246289959	1.39492385926443	5.59086304992406	3.25371450042491	6.22958572785467
ENSG00000081051.8_AFP	NA	4.3227867387809	3.14198696342875	2.78434487607049	2.87062454522425	1.20641608165016	1.7051978671648
ENSG00000081052.12_COL4A4	NA	10.1149943949758	10.6464937207596	9.45365476634298	10.4881098600667	9.76032371099951	10.5485709417183
ENSG00000081059.20_TCF7	NA	10.8999675574033	10.8775146299311	10.6418801893346	10.9323023870066	11.2201827462299	11.2390403727016
ENSG00000081087.15_OSTM1	NA	11.5763184588376	11.932810779151	11.9988753925744	12.0036273547768	11.7668268758795	11.8632779055063
ENSG00000081138.14_CDH7	NA	7.30791600674731	6.57999730475414	7.33356575912193	6.73607534768041	7.03950754502986	6.69442748963949
ENSG00000081148.12_IMPG2	NA	8.23620964314597	9.3390865476288	8.73262356101661	9.33291469176237	8.14667118541654	8.59276672089132
ENSG00000081154.12_PCNP	NA	13.9553820536078	14.256872422041	14.5625138920851	14.241263822836	14.1256810460277	14.2759289364771
ENSG00000081177.18_EXD2	NA	12.7661666891811	13.2920694592716	12.5102390772463	13.3656529898732	12.621989798385	13.1040235162787
ENSG00000081181.8_ARG2	NA	10.8536328383814	12.2964125669844	11.4026966475076	12.3179766352723	10.9016057552159	11.7483512414691
ENSG00000081189.15_MEF2C	NA	8.02086674001747	8.04765415142032	7.07332801191233	8.06708834693571	7.19887293561261	8.02241903982887
ENSG00000081237.20_PTPRC	NA	6.32922953977086	7.48336496308461	5.80409009350066	7.59420278639045	5.91054102805425	6.9084756736484
ENSG00000081248.11_CACNA1S	NA	-1	-1	-1	1.29089905871014	1.20641608165016	0.506140336067499
ENSG00000081277.12_PKP1	NA	3.14767234200784	0.756704934741344	0.646045912731413	2.66457719062308	-1	1.22681122250844
ENSG00000081307.12_UBA5	NA	12.604887684569	12.5112586184465	12.4761316610226	12.5914923026772	12.518230446372	12.6819088411043
ENSG00000081320.11_STK17B	NA	11.8621059423008	11.6093915867706	12.3985855087742	11.6447668855637	12.0014855778489	11.7147763751883
ENSG00000081377.17_CDC14B	NA	12.1976144013201	12.2379228515422	11.6090741692489	12.2988733630964	11.839431943284	12.3378674293609
ENSG00000081386.12_ZNF510	NA	11.7155553500226	12.0109884062162	11.4853961811197	11.9328363647971	11.4859880292382	11.9927072218213
ENSG00000081479.15_LRP2	NA	6.26095434894809	5.31316226439304	6.03248164284951	5.11141052956187	6.4769356488485	5.56780463463626
ENSG00000081665.14_ZNF506	NA	9.70700608061034	10.2886332754077	10.0426506705412	10.1304241090714	9.74976058510672	10.2911178852878
ENSG00000081692.12_JMJD4	NA	11.7007317952127	11.5280411805586	11.4886075599511	11.649145972423	11.7742912577229	11.9036868254241
ENSG00000081721.12_DUSP12	NA	11.8363106531768	9.69432394244003	11.8561625586508	9.74330987533034	11.7935198184194	11.2646280465094
ENSG00000081760.17_AACS	NA	12.8144184515709	12.6784561436116	12.5499776024452	12.69062573267	12.7230339633828	12.7721673432597
ENSG00000081791.9_DELE1	NA	12.7883167874524	12.8320444160872	12.5971058817134	12.8110047021798	12.6791734428052	12.7280373830993
ENSG00000081803.16_CADPS2	NA	10.2685030368367	9.66502624885271	9.51583385453999	9.77571265023627	9.92093821832627	9.95228137849096
ENSG00000081818.4_PCDHB4	NA	6.44144817705687	7.9744795914504	6.57400655729131	7.54241180055061	6.60301146678493	7.4234576929416
ENSG00000081842.18_PCDHA6	NA	4.72878449711598	6.81153465423849	5.19793198884244	6.82546361841024	5.00601257075044	5.64942166577552
ENSG00000081853.15_PCDHGA2	NA	7.61873939394544	7.22113655883534	6.94205038513103	7.00017716624071	7.55144213741021	7.64524969664946
ENSG00000081870.11_HSPB11	NA	12.8587644219763	12.2450115442922	13.5479947125147	12.2627512860714	13.0675967810022	12.3544413938027
ENSG00000081913.14_PHLPP1	NA	11.0235950151499	11.1599678313394	10.4684016386152	11.2611826231318	10.7187189655656	11.3398006541193
ENSG00000081923.14_ATP8B1	NA	12.4667931101776	12.2702462588512	11.8561625586508	12.0795671993666	11.9088966332492	12.321100844956
ENSG00000081985.11_IL12RB2	NA	3.85170670566739	5.65719240652507	4.44608860764274	5.70294365305073	3.8132450374244	5.25663577326202
ENSG00000082014.16_SMARCD3	NA	11.3084065867938	10.6432780125818	11.7156918166262	10.4802665154541	11.6079704491261	10.8993640390195
ENSG00000082068.9_WDR70	NA	12.2163268890946	11.2493962614497	12.2911114155807	11.0342548278179	12.1739329507335	11.7060604587398
ENSG00000082074.18_FYB1	NA	-1	2.02463226269727	-1	-1	-1	-1
ENSG00000082126.18_MPP4	NA	-1	2.39465370156298	2.78434487607049	2.42411916774553	1.68322706982405	2.5901164547137
ENSG00000082146.13_STRADB	NA	10.7153712448148	10.3292211241947	10.8773350297748	10.2013196464401	10.840340142485	10.729920598516
ENSG00000082153.18_BZW1	NA	15.4151529611685	15.5539485163306	15.7519163403987	15.6870739635497	15.5648722278351	15.7092818237316
ENSG00000082175.15_PGR	NA	10.8072574070625	11.0330329786835	10.542376762575	11.7422686672951	13.0025103042171	13.0838276738722
ENSG00000082196.20_C1QTNF3	NA	5.81373772649806	5.84804960175097	6.07867434104344	6.4770235319412	5.7742362138589	6.21178397553761
ENSG00000082212.13_ME2	NA	12.18010100622	12.5524115493565	12.3974469440816	12.6618760650042	12.3895145362461	12.5459913563592
ENSG00000082213.18_C5orf22	NA	13.055497031945	13.5336586792085	13.0343815587931	13.6123297343913	12.977507279259	13.4601776776113
ENSG00000082258.13_CCNT2	NA	11.9568676832527	12.3933888589666	12.3286295889775	12.4833253470691	12.1239774516918	12.4731417314406
ENSG00000082269.16_FAM135A	NA	11.1043556128627	12.049556438123	10.9000235918696	12.0815126190718	11.0368424470718	11.8242695523964
ENSG00000082293.13_COL19A1	NA	0.515145658870156	1.52569523028648	1.39492385926443	1.29089905871014	2.04098824485641	1.22681122250844
ENSG00000082397.17_EPB41L3	NA	2.36336513754916	1.52569523028648	2.25080803793905	-1	-1	2.35084444806025
ENSG00000082438.17_COBLL1	NA	10.2793297574834	10.4396178409634	9.82279762788814	10.307083036932	9.77528097774937	10.6878829814458
ENSG00000082458.12_DLG3	NA	13.5841313182567	13.9041853814178	13.1084419314681	13.8711432489208	13.301646873952	13.6792249020202
ENSG00000082482.13_KCNK2	NA	8.91505128318378	9.07839297014	9.61320365423768	9.16448973455643	9.73300352888013	9.3406353341404
ENSG00000082497.12_SERTAD4	NA	7.37405388378029	8.1296044121551	6.81136445807067	7.86507243750895	6.54833315809851	6.73238091145487
ENSG00000082512.15_TRAF5	NA	9.57439202134953	9.22612907856474	10.0012789454093	9.40304334035226	10.155090053996	9.97620405846507
ENSG00000082515.18_MRPL22	NA	12.850983694468	12.5290810034474	13.6742899836039	12.5704056367661	13.2467646828493	12.3564681695334
ENSG00000082516.9_GEMIN5	NA	12.8831005770196	11.7580169065104	12.4014279955557	11.9303198351521	12.8154735899033	12.7412829617027
ENSG00000082556.12_OPRK1	NA	8.95341302634078	9.50180324304719	8.97475938323987	10.0332592099828	9.02040140788167	9.69634372864214
ENSG00000082641.16_NFE2L1	NA	15.1469833139917	16.0208229001264	14.4717833464404	16.0793095399229	14.7688426835641	15.8563537099189
ENSG00000082684.16_SEMA5B	NA	3.54221607742052	2.93315015163294	1.88542602307657	2.66457719062308	1.68322706982405	2.5901164547137
ENSG00000082701.15_GSK3B	NA	13.6585818653973	14.3916124061161	13.0944579328162	14.4431292643961	13.343896641267	14.3289518713532
ENSG00000082781.12_ITGB5	NA	13.06193832012	12.4920220850806	12.4841982363085	12.3621247559918	12.798552001227	12.6786725298398
ENSG00000082805.20_ERC1	NA	13.2506289850244	13.6023349422608	12.3033209824862	13.6688463516128	12.8093101950363	13.6285501873318
ENSG00000082898.17_XPO1	NA	15.8367213492941	15.9089000857065	15.9388272315381	16.003847389479	15.7876928695557	15.9651594278354
ENSG00000082929.8_LINC01587	NA	-1	-1	0.646045912731413	-1	1.20641608165016	0.506140336067499
ENSG00000082996.19_RNF13	NA	11.5483947844268	12.1788133018826	12.0341012756244	12.177403594171	11.7754075914707	12.0207745767202
ENSG00000083067.22_TRPM3	NA	2.98788607713756	2.02463226269727	2.25080803793905	1.77408377862989	2.77119432927765	1.7051978671648
ENSG00000083093.9_PALB2	NA	11.5807015043692	11.8033804320842	11.2565118917578	11.7690723957683	11.3255529435889	11.7678989900546
ENSG00000083097.14_DOP1A	NA	11.5367112988198	11.6484088576882	10.9667916916211	11.6837082275552	11.262728063228	11.8639904278583
ENSG00000083099.11_LYRM2	NA	13.5916430822372	13.8828709109124	13.907712433179	13.8717054651826	13.6703437257354	13.7822343304937
ENSG00000083123.15_BCKDHB	NA	11.9666133025523	12.0151407421812	12.4980743378786	11.8309001638464	12.2468388924097	12.0252405917948
ENSG00000083168.11_KAT6A	NA	13.3124160809585	13.6442244298183	12.4053980917228	13.6817281090531	12.7790198509072	13.6071116723222
ENSG00000083223.18_TUT7	NA	12.0445181875683	12.4035612162021	11.1597754808337	12.4448015758265	11.5094356135093	12.2714802001542
ENSG00000083290.20_ULK2	NA	10.7997571747276	10.1429313367161	10.7949915058756	10.0452704646254	10.8101564334404	10.7086582896729
ENSG00000083307.12_GRHL2	NA	13.0630351838048	13.389648365079	12.6432235860922	13.224452866728	12.7295763264827	13.1975801023881
ENSG00000083312.17_TNPO1	NA	14.9439219477697	15.0611524357045	14.7990366960081	15.1605319534659	14.849410492125	15.3771798128003
ENSG00000083444.17_PLOD1	NA	14.7638743485308	14.7742197020477	14.3297186637268	14.8245451160553	14.6879610058388	14.6422413740742
ENSG00000083454.22_P2RX5	NA	6.22556557249617	8.09863350821507	5.85805963571011	8.82688381803438	7.05919619526824	8.4520076370424
ENSG00000083457.12_ITGAE	NA	12.1367043370399	11.2835334299928	13.4058978980067	11.234037588513	12.642120123263	11.2101915390972
ENSG00000083520.15_DIS3	NA	13.3634213392714	13.456824925757	13.1603782571698	13.6156899164406	13.1457867141927	13.478555396711
ENSG00000083535.16_PIBF1	NA	11.625512804413	11.5961477620731	11.9209869350083	11.6217788618703	11.797188416762	11.5984280655215
ENSG00000083544.14_TDRD3	NA	10.9664586042053	11.5239672811283	10.8959981440449	11.5654361907546	10.8796271954742	11.3050670100204
ENSG00000083635.8_NUFIP1	NA	10.7570196975381	10.9796376171497	10.731351184422	11.1617088088553	10.8274815148746	11.1471953337968
ENSG00000083642.19_PDS5B	NA	12.7728858058123	13.0439950077883	12.6816126073784	13.1805057995106	12.7385716048014	13.0541648885654
ENSG00000083720.13_OXCT1	NA	12.7960650640298	12.9154945356514	12.6710510507664	12.8143230327402	12.5740396201675	12.7846394010573
ENSG00000083750.12_RRAGB	NA	10.6026511588288	10.7124189252237	11.1333464131249	10.476328794575	10.6260506958116	10.364453766117
ENSG00000083799.17_CYLD	NA	11.9632601755241	12.1717629360786	11.0654331046977	12.260749533929	11.2520751316814	12.2930688835873
ENSG00000083807.10_SLC27A5	NA	9.94045941973873	9.1496255967758	10.7740884431387	9.1045263645536	10.6400092981483	9.6425447207534
ENSG00000083812.12_ZNF324	NA	11.5728024094964	11.6246906055304	10.8010316159372	11.8835119465182	11.2212754680923	11.6988898792919
ENSG00000083814.13_ZNF671	NA	10.1437166922464	10.2511015275802	9.99074794341921	10.2120150078186	10.0396655557561	10.3704836661876
ENSG00000083817.9_ZNF416	NA	9.90454688885981	10.1337947379133	9.9431638476088	10.2459481962911	9.88139316013287	10.2294198533574
ENSG00000083828.16_ZNF586	NA	10.5633272359106	10.6507702122205	10.9096390861608	10.7013222081505	10.6953177463029	10.8178641930671
ENSG00000083838.16_ZNF446	NA	10.788433205653	10.9117712482493	10.3892823883751	10.8840744402763	10.6285238127211	10.7813674220259
ENSG00000083844.10_ZNF264	NA	11.5412161513874	12.4348952747557	10.9813030091997	12.4425327959825	11.2413429528326	12.417926273856
ENSG00000083845.9_RPS5	NA	16.5916190996613	16.0214680788832	17.7031938381999	16.1665868315642	17.3439099810104	16.1676505680596
ENSG00000083857.14_FAT1	NA	14.4234288334525	14.2411825794376	13.5071455396456	14.254257577572	14.0829649713844	14.8403887889495
ENSG00000083896.12_YTHDC1	NA	13.2035182753555	13.3735671880722	12.5614600872904	13.3804778042083	12.767658600225	13.2718100081789
ENSG00000083937.9_CHMP2B	NA	13.129162680663	13.4647406167315	13.7502842185776	13.4886480599486	13.4028728336154	13.4948630333979
ENSG00000084070.12_SMAP2	NA	12.1494479286936	12.105541575626	11.8068452174419	12.2312615839492	12.0821878049554	12.5161586472661
ENSG00000084072.16_PPIE	NA	13.3788560641562	12.8797341137773	13.7611687881301	12.9307670803296	13.5770779749521	13.0010645370988
ENSG00000084073.9_ZMPSTE24	NA	13.8569100741351	13.7812109143833	14.1756952874011	13.7528322025163	13.9791591772862	13.8218300753873
ENSG00000084090.13_STARD7	NA	14.8118287625688	14.5906670062441	14.2994092565408	14.7002831033534	14.5807248596299	14.8384867841446
ENSG00000084092.7_NOA1	NA	12.4223067712055	12.6188577928784	12.3945965949904	12.741343265757	12.3919426814311	12.4314488996504
ENSG00000084093.17_REST	NA	13.2829968587308	13.9583453098998	12.5522814222293	13.8902292411828	12.7609113761745	13.9719015341366
ENSG00000084110.11_HAL	NA	5.00408364092563	4.86051850023434	5.15545866518147	5.22840670280634	5.29881181275606	4.90438082386206
ENSG00000084112.15_SSH1	NA	12.5433424755461	13.0553302924372	11.7856793582494	13.1339285642848	12.1818126234729	13.0118742610461
ENSG00000084207.17_GSTP1	NA	15.7498933158072	15.5155538380857	15.8824926265797	15.4869812228429	15.8661083530274	15.6376771649824
ENSG00000084234.17_APLP2	NA	16.3010761432779	16.3117840680069	15.8102704183458	16.3337270664348	15.9727528954329	16.3296189223694
ENSG00000084444.14_FAM234B	NA	12.0108091120192	12.6234888740441	11.8089876414958	12.6870099610153	12.0833901628097	12.5515307789198
ENSG00000084453.16_SLCO1A2	NA	2.80817268973273	2.93315015163294	3.17296538656624	2.13540673558656	3.11009006852155	2.35084444806025
ENSG00000084463.8_WBP11	NA	14.6814874018825	14.7971278974771	14.2940657854926	14.9142822899064	14.5313042351753	14.8466656968944
ENSG00000084623.11_EIF3I	NA	14.8884310682899	14.6466071782433	15.7389683731587	14.7507699881166	15.464770671836	14.821254950285
ENSG00000084628.10_NKAIN1	NA	6.99765330610964	6.74908429156488	6.7697331737744	7.16581306370947	7.55837641075588	7.49879431976554
ENSG00000084636.18_COL16A1	NA	4.67732429455829	4.86051850023434	3.47880794134591	5.11141052956187	4.58491900581844	4.71517261794909
ENSG00000084652.16_TXLNA	NA	14.0367536472517	14.1603482437048	13.4496722185371	14.2253686173549	13.7786902201683	14.396932180431
ENSG00000084676.15_NCOA1	NA	12.3437687662925	12.549265256236	11.5595449231699	12.4503325079881	11.8641268460021	12.6400918941282
ENSG00000084693.16_AGBL5	NA	12.425234349593	12.4038779495261	12.3467341155927	12.2420279851503	12.466639953786	12.4538664698734
ENSG00000084710.14_EFR3B	NA	9.55135202680322	9.85120352440052	8.81338538791668	9.90290957943537	9.20626559965925	9.76050583880312
ENSG00000084731.15_KIF3C	NA	11.1219051107141	11.4620451632233	10.8113276180733	11.1817971764126	11.0430354683387	11.3737176891925
ENSG00000084733.11_RAB10	NA	14.6484113372705	14.8510276124557	14.6935239301326	14.9982053529327	14.6331342127535	14.8975317411369
ENSG00000084734.9_GCKR	NA	2.80817268973273	2.39465370156298	2.54210121923842	2.13540673558656	2.95057042569612	2.79529286833288
ENSG00000084754.12_HADHA	NA	14.3605860786767	13.979643768719	14.4592885627263	13.9885403696956	14.3694690420533	14.1082738149367
ENSG00000084764.12_MAPRE3	NA	9.99138943624864	10.6063233921186	9.91320417171729	10.6366363918839	9.897888302016	10.2160876346686
ENSG00000084774.14_CAD	NA	14.3012689445052	14.3126754291297	13.6207796340922	14.4832921772573	14.2874654139137	14.7130075747578
ENSG00000085063.16_CD59	NA	14.5130126167177	14.103275043418	14.8363283397134	14.1515899517678	14.5823735293469	14.1849085369765
ENSG00000085117.12_CD82	NA	11.5153480060371	10.6834900886395	11.091716705662	10.4634564650685	11.307659952225	10.9221216572788
ENSG00000085185.15_BCORL1	NA	13.8859777476449	14.010129364508	13.107919970413	13.9545344384123	13.6281250558896	14.1002077462794
ENSG00000085224.22_ATRX	NA	13.2108887154241	13.7358885591076	12.4489126038306	13.7075715660883	12.7212971837514	13.7042084864118
ENSG00000085231.14_AK6	NA	11.6432223695936	11.8309660791395	11.7060676103451	12.0407642940433	11.5425968539359	11.9119791058633
ENSG00000085265.11_FCN1	NA	1.71695370984036	-1	1.39492385926443	-1	0.489356241498477	-1
ENSG00000085274.15_MYNN	NA	13.061467980278	12.6597466870601	13.7397661858552	12.7035258803699	13.3793261379451	12.7927075111913
ENSG00000085276.19_MECOM	NA	14.9466412458379	15.1548346005891	14.4609925895675	15.0485095457997	14.5051874251544	14.9616799632659
ENSG00000085365.18_SCAMP1	NA	12.8809697059036	13.2930957503862	13.3342232595578	13.215769897665	13.1454989393182	13.4705073841616
ENSG00000085377.14_PREP	NA	12.528217944756	11.9563234185276	12.4121786559562	11.9739121700506	12.5620145029245	12.4164698747865
ENSG00000085382.12_HACE1	NA	11.2676670157306	11.7845303786852	11.314966714467	11.7149575119384	11.2234584320084	11.6988898792919
ENSG00000085415.16_SEH1L	NA	13.3237040740469	13.5831643319822	13.6363063689156	13.7782432248645	13.7027817545085	13.845563270203
ENSG00000085433.15_WDR47	NA	11.0113086400125	11.2093668853397	10.9144229070476	11.1920375850819	10.8913449819234	11.1289334505434
ENSG00000085449.15_WDFY1	NA	12.571583388603	12.774419416475	11.9284948770345	12.744211645795	12.1063423611458	12.9049781392787
ENSG00000085465.13_OVGP1	NA	7.92484295009435	8.91378401376521	8.00039222039664	9.12730568719641	8.1964159216527	8.54735602794752
ENSG00000085491.17_SLC25A24	NA	13.7946943701232	14.1721106119183	13.8646935990345	14.2191231788696	13.7972195941947	14.0398472212869
ENSG00000085511.20_MAP3K4	NA	11.9189451343542	11.1211980921856	11.2118718608949	11.1219337549477	11.5241205505982	11.5421107123493
ENSG00000085514.16_PILRA	NA	4.96169592171454	5.69080727682469	5.3563265242471	5.26538795390053	5.04603085491909	5.84687490664973
ENSG00000085552.17_IGSF9	NA	10.9824477178868	10.1474780290243	10.7897940649122	9.6432490541381	10.9151742440677	10.145170448953
ENSG00000085563.14_ABCB1	NA	10.2454989665626	11.0557860690086	9.291505802778	11.1617088088553	9.70202836937498	10.7086582896729
ENSG00000085644.14_ZNF213	NA	10.8701988487765	11.4951232539339	10.385841854214	11.5760544277659	10.7659110294883	11.2977023955081
ENSG00000085662.14_AKR1B1	NA	13.5414843769609	13.4870350455514	13.5344632697299	13.5923437570095	13.503872077486	13.450959557883
ENSG00000085719.13_CPNE3	NA	14.2479763466472	14.1259152454213	14.5049356588009	14.220080116629	14.4054256495898	14.4208570648344
ENSG00000085721.12_RRN3	NA	12.8729507906124	12.988479337057	12.6596995115473	13.0997822639965	12.7612870509494	13.0741616408277
ENSG00000085733.16_CTTN	NA	14.092375047525	14.1828553234624	13.3641088183704	14.1621228563578	13.796578276399	14.1952787180816
ENSG00000085741.13_WNT11	NA	6.18928684655292	6.81153465423849	6.28975619807278	6.6266383908548	6.88259881724608	6.7934987551774
ENSG00000085760.15_MTIF2	NA	12.5041916855656	12.4186865196313	12.3517394202378	12.3864589310879	12.4229047769231	12.5395388661802
ENSG00000085788.14_DDHD2	NA	12.897226516275	13.1875927434838	12.6197389033432	13.1922565095569	12.7393345769309	13.1607952692257
ENSG00000085831.15_TTC39A	NA	10.8594165293037	10.9461034618847	10.5174388419863	10.8249179770278	10.8137830227	11.0671602294889
ENSG00000085832.17_EPS15	NA	12.5684971909426	13.5803647265874	12.6658593466208	13.5507025275676	12.5466228424433	13.426568413666
ENSG00000085840.13_ORC1	NA	13.4942893518546	13.459112758772	13.0882970505772	13.5724229020764	13.1794879244904	13.2786397945468
ENSG00000085871.9_MGST2	NA	12.4210851913489	11.5989169360167	13.2848953895886	11.5235957585124	12.836483944041	11.8384778720109
ENSG00000085872.15_CHERP	NA	13.4919642123729	13.7522745819996	12.8431606906151	13.9338649912719	13.3956313144884	13.7185602896609
ENSG00000085978.22_ATG16L1	NA	12.1780776061432	11.9653647242902	11.9503989414127	12.0834554189845	12.1528985294928	12.0182163471968
ENSG00000085982.13_USP40	NA	12.5011889753831	12.2611845565674	11.9114470265529	12.0223153155485	12.1134222862572	12.4493632609209
ENSG00000085998.14_POMGNT1	NA	12.6554207208849	12.3997549825228	12.6743451614551	12.3411671424804	12.5971620867641	12.3612703809894
ENSG00000085999.13_RAD54L	NA	12.2923185280274	11.8713800834103	11.874690736031	12.0648923268275	12.1286439618468	12.1141726295849
ENSG00000086015.21_MAST2	NA	12.183274912384	12.4336548922994	11.7782629398598	12.5078854992073	12.2776285784466	12.5524151160623
ENSG00000086061.16_DNAJA1	NA	15.395104068499	14.9307272654817	14.9542133518661	15.1560387707567	15.1784102104372	15.1186276767921
ENSG00000086062.12_B4GALT1	NA	13.3808680970759	13.5841429117949	12.9893719695029	13.6015242556518	13.2065003818776	13.5352349100469
ENSG00000086065.14_CHMP5	NA	13.4030647293005	13.4165815915226	14.2839353582534	13.4716887365873	13.7848931584085	13.3077365912375
ENSG00000086102.19_NFX1	NA	12.654797260583	12.62918917312	12.0100925523373	12.7003643915341	12.3177703881861	12.7738744406708
ENSG00000086159.13_AQP6	NA	5.43430687748148	4.73724315776088	4.87044268804238	4.51653564172377	5.00601257075044	5.03159778070322
ENSG00000086189.10_DIMT1	NA	12.4891152456697	12.1237306890326	13.2819677697701	12.2318456102911	13.0170550737157	12.4555220099807
ENSG00000086200.16_IPO11	NA	11.6225399591094	11.8024197306503	11.6763343446897	11.9245512302297	11.6229313279571	11.9753371609067
ENSG00000086205.18_FOLH1	NA	11.6002620724526	11.8394209900688	11.6144739067293	11.3723616852437	11.1655994324092	11.2118716682922
ENSG00000086232.13_EIF2AK1	NA	15.360090935093	15.4396167097352	15.4109348758646	15.4198837923389	15.3390708507689	15.3282568127225
ENSG00000086288.12_NME8	NA	1.23773309057468	0.756704934741344	1.88542602307657	1.77408377862989	2.04098824485641	1.7051978671648
ENSG00000086289.12_EPDR1	NA	13.331657469175	12.9536388189589	13.1240135916636	13.0244214082874	12.9773455974883	13.1118433929597
ENSG00000086300.15_SNX10	NA	11.0810317599772	11.4559486249713	11.7517783321916	11.3643939489542	11.2321574060919	11.5759902961152
ENSG00000086475.15_SEPHS1	NA	14.1353184095314	14.8479464103359	14.0038956987985	14.9109584224877	14.0713470343545	14.5671132867691
ENSG00000086504.17_MRPL28	NA	13.590013413906	13.5449034135662	13.3793273081767	13.5348162648059	13.5377083217785	13.4989973122327
ENSG00000086506.3_HBQ1	NA	1.71695370984036	0.756704934741344	2.54210121923842	0.559151537014313	1.20641608165016	-1
ENSG00000086544.3_ITPKC	NA	11.1917633652153	11.6785661790006	10.3284529527696	11.7385747236267	10.5636652159164	11.5478867549391
ENSG00000086548.9_CEACAM6	NA	5.0452614338161	4.4537341295815	3.33397612761004	4.2475209474086	4.34936550054092	3.83831471953006
ENSG00000086570.12_FAT2	NA	15.0495560374884	14.4078896167924	13.5853461778425	14.5499701016345	14.0378605113029	14.9361162984311
ENSG00000086589.12_RBM22	NA	13.5891435041638	13.3109386634953	13.384795628336	13.3661850790308	13.4287636580007	13.5766826580349
ENSG00000086598.11_TMED2	NA	15.9253120971532	15.6915868893907	16.5568295614096	15.693448353233	16.1272547354598	15.7522736189998
ENSG00000086619.14_ERO1B	NA	11.3335564530082	12.0295805187951	12.0115816056294	12.0152084518305	11.5852341482785	11.9137006813905
ENSG00000086666.19_ZFAND6	NA	13.2790915070261	12.925677130041	14.4103871217825	12.8757762702624	13.7309624570268	13.0457111542273
ENSG00000086696.11_HSD17B2	NA	0.515145658870156	-1	0.646045912731413	-1	0.489356241498477	1.22681122250844
ENSG00000086712.13_TXLNG	NA	11.9642669321903	12.3337961079111	11.6819562098117	12.546191406853	11.8811651617603	12.4321697614052
ENSG00000086717.18_PPEF1	NA	3.75573554863011	5.17747196015812	3.47880794134591	4.93901380891317	3.8132450374244	3.83831471953006
ENSG00000086730.17_LAT2	NA	7.21172293903251	8.01485233203751	7.21448813012723	7.74583252833146	7.19887293561261	7.66500904159039
ENSG00000086758.16_HUWE1	NA	15.4552097760507	15.9646589465566	14.4144030319626	16.0961664927397	14.98050885712	16.0755118053468
ENSG00000086827.9_ZW10	NA	12.627094803631	12.5455380418037	12.0197440395236	12.4749626065551	12.1899285952837	12.5708620656263
ENSG00000086848.15_ALG9	NA	12.1907492313927	12.3187571773278	11.8954056409201	12.3685124785776	11.977435043461	12.2962399084156
ENSG00000086967.10_MYBPC2	NA	5.46497878749973	6.01658249431249	4.70359691329247	6.12125527569217	5.29881181275606	5.77595878310884
ENSG00000086991.13_NOX4	NA	0.515145658870156	-1	1.39492385926443	-1	0.489356241498477	-1
ENSG00000087008.16_ACOX3	NA	10.3385022154981	10.2762308648939	9.53666827442068	10.3464462090852	9.89103823148006	10.1404731907406
ENSG00000087053.18_MTMR2	NA	12.9345185675437	12.7810183254961	12.7899223598427	12.6861578726152	12.6593554879708	13.0023595166204
ENSG00000087074.8_PPP1R15A	NA	12.4400250393907	13.3416837424579	12.1934677788579	13.4384256010372	12.2104337598271	13.1029675961636
ENSG00000087076.9_HSD17B14	NA	10.1089379257506	9.17656912409161	10.6863771693521	8.96817387235458	10.43205577078	9.01847344092602
ENSG00000087077.14_TRIP6	NA	13.4964947687841	12.8804171088283	13.0502255644344	12.9347184350456	13.242600109264	12.9636603329035
ENSG00000087085.15_ACHE	NA	4.6239604202995	4.73724315776088	4.70359691329247	4.7431845711254	5.04603085491909	4.6637219601316
ENSG00000087086.15_FTL	NA	17.5858761724586	17.5961695997595	17.2975576303367	17.376293117978	17.2548720448814	17.5973825143269
ENSG00000087087.20_SRRT	NA	14.5891686229328	14.3940856547109	13.8120448701259	14.4074494225249	14.229181705763	14.4224904386807
ENSG00000087088.20_BAX	NA	13.4261433569562	13.9185546173673	13.370505642137	14.0195663210889	13.4330143297584	13.5884787816852
ENSG00000087095.13_NLK	NA	11.5439123264229	11.8143827608803	11.3221848076384	11.8181226348638	11.4208976143215	11.9406324042059
ENSG00000087111.21_PIGS	NA	13.6783485922917	13.2640799786291	13.2745451060882	13.2881715847874	13.4797625598016	13.5780946113469
ENSG00000087116.16_ADAMTS2	NA	7.14699158608986	6.21445287653312	6.74129623084279	6.32766940385231	6.96840102314138	6.61538721351971
ENSG00000087128.10_TMPRSS11E	NA	-1	2.39465370156298	-1	1.29089905871014	0.489356241498477	1.22681122250844
ENSG00000087152.15_ATXN7L3	NA	13.5867485442044	13.8640020476539	12.9989749466966	13.9375393904799	13.3241983458146	13.7116496558976
ENSG00000087157.19_PGS1	NA	10.9132351726176	10.9179939080707	10.6552787192668	10.8981242764968	10.8906583286476	10.8534604170243
ENSG00000087191.13_PSMC5	NA	14.7357036442064	14.4841606493427	14.2247447093859	14.5759051815001	14.3395285973426	14.6345368604024
ENSG00000087206.17_UIMC1	NA	12.6141109593741	12.7309009324744	12.552025623854	12.8059147991427	12.5652453573211	12.7138788247792
ENSG00000087237.12_CETP	NA	-1	-1	-1	2.42411916774553	1.20641608165016	0.506140336067499
ENSG00000087245.13_MMP2	NA	8.65064896718822	8.12346319225668	8.1539126634021	8.33837810464923	8.9873836309117	8.86463258379823
ENSG00000087250.8_MT3	NA	7.64576477266543	5.39701401244114	8.49356406710747	5.4693360655418	8.10465520652172	5.91446784077934
ENSG00000087253.13_LPCAT2	NA	11.6816795541759	11.8686289656181	11.6358729957057	12.0012314271673	11.9055016982153	12.2292456635751
ENSG00000087258.15_GNAO1	NA	8.67052393677548	10.118437302434	8.17000418812502	10.0465988964795	8.50355207025309	9.61402683876061
ENSG00000087263.17_OGFOD1	NA	13.291578338132	13.3095869425954	13.1327634952372	13.44398098408	13.2207757016886	13.5263730110826
ENSG00000087266.17_SH3BP2	NA	13.0189814031612	13.8057481218781	12.7465411542668	13.8833687495543	13.1546793823414	13.9010310085148
ENSG00000087269.16_NOP14	NA	13.3802396381673	13.2691305099477	12.9972849417075	13.466735490748	13.3432694399848	13.4369012769711
ENSG00000087274.17_ADD1	NA	14.6420292338692	14.646339497212	14.1687050163861	14.630354001276	14.3260055347849	14.5214957978432
ENSG00000087299.12_L2HGDH	NA	11.9615806849595	12.1462439207259	12.0468654426151	12.1296280090669	12.037911647494	12.1662277600476
ENSG00000087301.9_TXNDC16	NA	12.2208269315489	12.1102074501583	12.0816613806075	12.0995444743747	11.9809876435148	12.0857444795048
ENSG00000087302.9_RTRAF	NA	14.4431808514554	14.1371034907622	14.8103097083602	14.1712098808276	14.6123567278372	14.1563273281391
ENSG00000087303.18_NID2	NA	11.5820138255876	12.0349072672703	11.0952320983787	12.066202821356	11.3472362364248	12.2569061540997
ENSG00000087338.5_GMCL1	NA	13.0022510928121	13.4723111179584	12.7775039812033	13.5510535763427	12.7265012627681	13.3129644426885
ENSG00000087365.16_SF3B2	NA	15.1392410186531	15.043626083203	14.3410150506266	15.100840040723	14.7065636665589	15.08460618982
ENSG00000087448.11_KLHL42	NA	13.4350061635904	13.7088418068167	12.9001424498981	13.641963761212	12.9961404652134	13.7017195431288
ENSG00000087460.25_GNAS	NA	16.5848710713937	16.3061609545159	16.3558842821646	16.3909156998339	16.4954728318749	16.493729733501
ENSG00000087470.18_DNM1L	NA	14.2894017242495	14.2962197049975	14.2230586583722	14.3519834883311	14.1816961753928	14.3555419063077
ENSG00000087494.16_PTHLH	NA	6.07463315708683	6.23738228747774	6.50802031570107	6.16104878396755	6.14970301198833	6.17550762164631
ENSG00000087495.17_PHACTR3	NA	0.515145658870156	1.52569523028648	0.646045912731413	-1	-1	-1
ENSG00000087502.18_ERGIC2	NA	13.1925347242506	13.0084037149105	13.6250418517834	13.0527938617548	13.3095029886589	13.106133040824
ENSG00000087510.7_TFAP2C	NA	10.555332172042	10.8920377334736	10.1998197884253	10.7769027753718	10.2351643871563	10.7086582896729
ENSG00000087586.17_AURKA	NA	13.4883528241374	13.316501163631	13.6128305235526	13.3146016443815	13.5003881339925	13.3344598316133
ENSG00000087589.16_CASS4	NA	4.25419858187711	5.98982566245203	3.61041742401945	6.08033294301964	3.90314369101115	4.30926028307638
ENSG00000087842.11_PIR	NA	13.0425275318075	12.6458884024958	13.6211454608431	12.5534517220257	13.2038770615842	12.5671477436077
ENSG00000087884.14_AAMDC	NA	10.0807459403712	8.44733437084348	10.2511452232289	8.40617969866867	10.027223660275	8.99784633976617
ENSG00000087903.13_RFX2	NA	9.58838973765571	9.50180324304719	9.97251400306953	9.52813965223537	9.93831943941691	9.64420481656778
ENSG00000087995.15_METTL2A	NA	12.6251864872742	12.3695868855779	13.318969905881	12.4455570436045	13.0846585844418	12.4500752290668
ENSG00000088002.11_SULT2B1	NA	9.1736645465569	9.79435390860334	8.78928077107056	8.98212617565772	8.43362132615536	8.73976007079148
ENSG00000088035.18_ALG6	NA	12.6973979771644	12.5654949341672	13.1269361265902	12.5313230298017	12.8457245558442	12.5879983617707
ENSG00000088038.19_CNOT3	NA	13.1830532351928	13.1670272496699	12.6405795123781	13.3838976010725	13.0150087093085	13.2049102099532
ENSG00000088053.11_GP6	NA	2.36336513754916	3.99685448657254	1.88542602307657	4.45383714145649	3.11009006852155	3.83831471953006
ENSG00000088179.9_PTPN4	NA	11.4593237303748	12.3397680577289	11.6382847477444	12.5398379992104	11.7346652064026	12.5415444532285
ENSG00000088205.13_DDX18	NA	14.089763491811	14.1014210456288	14.385766996587	14.3075883483207	14.3122263229808	14.3537040814799
ENSG00000088247.17_KHSRP	NA	15.63006444815	15.4271275857676	15.0752547378084	15.4720428305406	15.4409314040599	15.5029588216088
ENSG00000088256.9_GNA11	NA	14.0305191171776	13.5972199384187	13.3294552318205	13.708620912323	13.722884180172	13.908475386532
ENSG00000088280.19_ASAP3	NA	11.5639746125816	11.6473391726212	10.7030615949095	11.4151575193453	10.8544943633024	11.2357409516826
ENSG00000088298.13_EDEM2	NA	11.7513781680257	11.8566464574872	11.971592931758	11.8489052889222	11.8200885118598	11.6872617862409
ENSG00000088305.18_DNMT3B	NA	10.3260251181217	9.62646183816554	10.013220994028	9.72351302950188	10.2725405247635	10.2557202712908
ENSG00000088320.4_REM1	NA	5.46497878749973	4.80019713187699	5.83132721711074	3.7174550846552	5.29881181275606	3.52893957787693
ENSG00000088325.16_TPX2	NA	14.7631996410693	14.7080455837749	14.0610996373097	14.7625900121463	14.3168340319023	14.6133466994707
ENSG00000088340.16_FER1L4	NA	6.18928684655292	7.07604456035661	6.82497880192176	7.07499276817539	6.92613769650597	6.81723889059053
ENSG00000088356.6_PDRG1	NA	13.0022510928121	12.8090307307338	13.2785704554484	12.8785761659996	13.1965340661432	12.8027760620297
ENSG00000088367.23_EPB41L1	NA	11.6890059153461	11.2979199416381	11.3167746262294	11.1836095972377	11.6982428621846	11.6099422464025
ENSG00000088386.17_SLC15A1	NA	10.6993370206446	10.2067699135424	10.724103582936	10.168749432775	10.6731287450397	10.4869986259312
ENSG00000088387.19_DOCK9	NA	11.8792873156419	12.1583091165904	11.1516949058561	12.1618578627903	11.5898947683274	12.1925605618647
ENSG00000088448.14_ANKRD10	NA	12.6309038803556	12.8032795165144	12.675519809132	12.9284270918487	12.5795888208547	12.4859274537332
ENSG00000088451.11_TGDS	NA	11.6373433026931	11.1667026942638	12.8630932709157	11.2720128035111	12.3785370242452	11.5133326861268
ENSG00000088538.13_DOCK3	NA	10.1613820166254	10.8302216961041	9.75862638773013	10.7428890039794	10.0979370540132	10.6354317574475
ENSG00000088543.15_C3orf18	NA	10.1472671039932	10.3211943904838	10.2486218584011	10.1013164653303	10.1262133176667	10.0023276955692
ENSG00000088682.14_COQ9	NA	12.9072075291068	12.5762141673444	13.0831723131591	12.586249460075	13.0672929774826	12.8014748367257
ENSG00000088726.16_TMEM40	NA	4.87299080009219	3.88513758306847	4.37382872199675	3.82044798456638	3.25371450042491	3.27834984296906
ENSG00000088727.12_KIF9	NA	10.4297638863683	10.104474431934	11.3763554616118	10.2366667541278	11.1118185448696	10.3854490680981
ENSG00000088756.12_ARHGAP28	NA	8.81443184915189	8.88865684159034	8.70711874991732	8.95408531757008	8.65031700836368	8.78560807951453
ENSG00000088766.12_CRLS1	NA	12.7862308820012	12.7494634614289	13.177227744759	12.7645358850597	12.9111746993729	12.6218827913073
ENSG00000088808.18_PPP1R13B	NA	11.8081779463876	11.4650837984597	11.2930931904999	11.466678551767	11.50136219553	11.6426983598959
ENSG00000088812.18_ATRN	NA	13.4877694946001	13.3870873920024	12.7142135128019	13.3859980693408	13.0330112184916	13.5160970750717
ENSG00000088826.18_SMOX	NA	8.8584164519306	9.7005253551062	8.74699782191649	9.89850221866687	9.47350526692681	10.5600486877936
ENSG00000088827.12_SIGLEC1	NA	3.85170670566739	3.63183436999618	3.73101814390125	3.60654045142147	4.47194437098392	4.09291939637801
ENSG00000088832.17_FKBP1A	NA	14.7220294270411	14.4768027868416	14.7815239464218	14.5960618884725	14.6895903300933	14.6847029105509
ENSG00000088833.17_NSFL1C	NA	13.5942467285954	12.5486924650159	13.2697309258503	12.4349443244582	13.3717191391772	13.2809092238436
ENSG00000088836.14_SLC4A11	NA	12.1145064593513	11.2731688012792	11.5182406666295	10.9733931837571	11.7865236756833	11.3150020892466
ENSG00000088854.12_C20orf194	NA	10.6839376505262	10.8264460439107	10.5434065459226	10.673217097153	10.6408262016665	10.6838532019648
ENSG00000088876.12_ZNF343	NA	10.9097555073926	10.9685459483614	10.253664182237	11.0375990247328	10.5943519791796	11.0289125569518
ENSG00000088881.20_EBF4	NA	9.40282612697066	9.08156428525302	9.42488707731522	9.07878687938485	9.5097306144536	9.00819675483116
ENSG00000088882.8_CPXM1	NA	5.60925847691052	5.35569725243715	6.07867434104344	4.57662241946427	6.2213570962596	5.89228688253257
ENSG00000088888.18_MAVS	NA	13.610306733714	13.8680252075456	12.9260354820609	13.8019367273048	13.2323390321646	13.8366976690268
ENSG00000088899.15_LZTS3	NA	11.8483574025695	12.1310191349161	11.6786794513952	12.0300590634622	11.721210909438	11.9112899000181
ENSG00000088926.13_F11	NA	0.515145658870156	0.756704934741344	-1	0.559151537014313	0.489356241498477	-1
ENSG00000088930.8_XRN2	NA	13.9637120949119	13.735259436008	14.0312220932496	13.7286217506995	13.9728473699643	13.8542850818101
ENSG00000088970.16_KIZ	NA	10.3580395495515	9.85306046550572	10.29582697287	9.79796920899912	10.4517412928619	10.361429338689
ENSG00000088986.11_DYNLL1	NA	15.0821114260208	13.4510127922897	16.0165484970995	13.4700807963005	15.5135028848723	14.360536551368
ENSG00000088992.18_TESC	NA	6.47197022792765	5.65719240652507	6.87818668220498	6.31007827479827	7.11669956097558	6.7934987551774
ENSG00000089006.16_SNX5	NA	14.543700918851	14.3341899476119	14.7974730015877	14.4849467135427	14.6923017880735	14.667612918862
ENSG00000089009.15_RPL6	NA	16.6848043943905	16.757892565144	16.9547164739154	16.7678279956079	16.8817251611627	16.8543769269862
ENSG00000089022.14_MAPKAPK5	NA	12.6780968453356	12.9438701906948	12.7585628114193	13.0975409385775	12.8047614292564	12.9144672689266
ENSG00000089041.17_P2RX7	NA	5.58153381889173	6.14339347423055	5.53261477706341	5.56142747981494	5.3635854813465	5.77595878310884
ENSG00000089048.14_ESF1	NA	11.4829321288326	11.6998749939619	10.849296144692	11.8738156611909	11.155917082402	11.8925557855255
ENSG00000089050.16_RBBP9	NA	12.3101132840365	12.2611845565674	12.6441838672516	12.0753431022451	12.4090659912396	12.5152517970961
ENSG00000089053.13_ANAPC5	NA	14.4310951434945	13.4301729808132	14.4205811650464	13.480439081912	14.4604840844241	14.0415015939997
ENSG00000089057.15_SLC23A2	NA	12.034328132461	12.4920220850806	11.5019118893075	12.5588148949498	11.8258469863268	12.5972408674954
ENSG00000089060.11_SLC8B1	NA	11.0642273744258	11.1288825646077	10.7510963712253	11.1425796642209	10.9695081522112	11.2966472320461
ENSG00000089063.15_TMEM230	NA	13.0575425069885	13.037477489715	13.6097614729136	12.8789490752084	13.2796554413911	12.978705690066
ENSG00000089091.16_DZANK1	NA	9.31505855746231	8.88503125173962	9.22117403000255	8.51766670148655	9.04776117563317	8.83295811204138
ENSG00000089094.19_KDM2B	NA	12.0780777637455	12.1942771284285	11.455073486393	12.1612447996331	11.908557499022	12.201608283678
ENSG00000089101.18_CFAP61	NA	6.70823557339182	7.41461492410472	7.36186043707042	7.6300901339652	7.26818279879385	7.30251995042392
ENSG00000089116.4_LHX5	NA	3.75573554863011	2.02463226269727	3.47880794134591	1.29089905871014	4.21539643595068	3.27834984296906
ENSG00000089123.16_TASP1	NA	10.5146784322352	10.2212198110651	10.4421396461627	10.2723044700963	10.4766628595229	10.4618028533905
ENSG00000089127.13_OAS1	NA	7.16578451281432	6.44861659573961	7.75935089357881	5.83180990526253	7.53043706978812	7.33577409828098
ENSG00000089154.11_GCN1	NA	14.200492730134	14.2180438173119	13.3460748397128	14.3769499766066	13.992900723878	14.4169779609525
ENSG00000089157.16_RPLP0	NA	18.135471702591	18.3313500253848	18.2564253915439	18.405789635875	18.1967504328197	18.442368695162
ENSG00000089159.16_PXN	NA	13.8678007419012	13.765275357881	13.1157296267657	13.661928759179	13.3988944969531	13.7597259581121
ENSG00000089163.4_SIRT4	NA	7.62554334800245	6.91471212958773	8.08203103560918	6.5833602067478	7.61932919718816	6.60178234381474
ENSG00000089169.15_RPH3A	NA	0.515145658870156	3.14198696342875	1.39492385926443	2.66457719062308	1.20641608165016	1.7051978671648
ENSG00000089177.18_KIF16B	NA	11.1225064746699	11.5384644012803	10.203733176292	11.5528707582788	10.5558904416003	11.3315817376402
ENSG00000089195.15_TRMT6	NA	12.4257217022701	12.4127183679807	12.1225448538439	12.6075575766555	12.1543294756657	12.4665888485408
ENSG00000089199.10_CHGB	NA	3.14767234200784	3.48628246289959	2.54210121923842	3.91657568080638	1.68322706982405	2.5901164547137
ENSG00000089220.5_PEBP1	NA	15.0755268678195	15.0895370859425	15.1696861316786	15.1310534000719	15.0857591627806	15.0104820155366
ENSG00000089234.16_BRAP	NA	11.6028502243058	11.9571869405958	11.4302365939625	12.0596384120931	11.478696043201	11.8113982540004
ENSG00000089248.7_ERP29	NA	15.2235704435094	15.529300868071	15.3668233499761	15.4478023611109	15.2207873242224	15.2206551725855
ENSG00000089250.19_NOS1	NA	11.9299804028119	10.7607003285326	10.5330754848776	10.6322191105059	10.577384422231	10.7212959686361
ENSG00000089280.18_FUS	NA	16.2617476901367	15.741342210847	15.4987617726329	15.8247020728649	15.83886923329	15.9814004846822
ENSG00000089289.16_IGBP1	NA	12.6433191457118	12.8035196087393	13.0275902073993	12.7576577205318	12.7484589075585	12.6558127668534
ENSG00000089327.15_FXYD5	NA	12.2596148322607	12.0839610951361	12.2825028181964	12.1615513637763	12.3882989294125	12.2693303502329
ENSG00000089335.21_ZNF302	NA	11.6289028576852	11.456559439427	11.7225271527927	11.2990165137059	11.5469613159493	11.5210330127328
ENSG00000089351.14_GRAMD1A	NA	12.0240655905827	12.4358248622473	11.9162248661692	12.6167538719482	12.2609881702044	12.2980864592746
ENSG00000089356.18_FXYD3	NA	10.9346237665045	9.38344691568762	12.194123628411	9.36308355571482	11.6721089014652	10.36243818581
ENSG00000089472.16_HEPH	NA	5.63646037300286	4.80019713187699	4.92202912039724	4.7431845711254	4.47194437098392	5.03159778070322
ENSG00000089486.17_CDIP1	NA	11.3920857132467	11.0140707072926	11.1456046337343	11.1194110239452	11.4472872177177	11.5932810056688
ENSG00000089505.17_CMTM1	NA	7.98427974234481	7.61175411497521	7.78046701845298	7.49648992414825	7.90696186373746	7.06539564840835
ENSG00000089558.9_KCNH4	NA	3.75573554863011	2.39465370156298	2.99170115686585	1.77408377862989	3.25371450042491	2.79529286833288
ENSG00000089597.18_GANAB	NA	15.9231995698477	16.0155992445466	15.3485657610364	16.0245773993783	15.6637611494909	16.0040411867682
ENSG00000089639.11_GMIP	NA	11.1581371573681	10.9539115853794	10.5069194582795	10.9120386055114	10.9131470881085	10.924855920916
ENSG00000089682.16_RBM41	NA	11.1692391896459	11.467510107016	10.8130364972398	11.2737154244252	10.8817019679924	11.6649477136457
ENSG00000089685.15_BIRC5	NA	14.866655327867	13.9259616189309	15.5766831311267	13.8331591878073	15.1921290840798	14.0495102432156
ENSG00000089692.9_LAG3	NA	6.54556444227028	7.53054063542577	7.08469059939036	7.416547821798	7.05919619526824	6.70718989152012
ENSG00000089693.10_MLF2	NA	15.3325473964177	15.1479021629716	15.289298398647	15.2565369486231	15.3729592496979	15.2656344223312
ENSG00000089723.10_OTUB2	NA	10.1484486355789	10.9796376171497	10.139808267503	10.9473156001647	10.4498780114022	11.2434278956429
ENSG00000089737.17_DDX24	NA	14.7537204542026	14.5400543986043	14.2679043617114	14.6526617439046	14.537952091343	14.7080061287382
ENSG00000089775.11_ZBTB25	NA	10.4394494420963	11.6071927083054	10.706743186896	11.6699825245634	10.5892826325212	11.1530372924812
ENSG00000089818.18_NECAP1	NA	13.2402766890445	13.3952346948448	13.399372082203	13.4842430727437	13.3670368817967	13.4809959072095
ENSG00000089820.15_ARHGAP4	NA	6.39441910072232	7.43459436052371	6.72686476422288	7.1361703760133	6.69397877064339	6.60178234381474
ENSG00000089847.12_ANKRD24	NA	5.81373772649806	6.14339347423055	5.56542742988981	6.25598011034689	5.7742362138589	5.89228688253257
ENSG00000089876.12_DHX32	NA	11.962924433787	11.7545440224139	11.9426141827571	11.7132855554074	11.8735401866086	11.9809315048861
ENSG00000089902.10_RCOR1	NA	13.2280345157094	13.2567339268478	12.505491169979	13.3214771907419	12.9042174844678	13.5913859130614
ENSG00000089916.18_GPATCH2L	NA	12.5243550241317	13.1124532909233	12.1239223028378	13.2307483710094	12.2175696426097	12.9898468254405
ENSG00000090006.17_LTBP4	NA	12.2794337329904	12.2168059549598	12.0311678269885	12.265320892977	12.3465971645831	12.1578265732276
ENSG00000090013.11_BLVRB	NA	12.2756538886956	12.5159546850344	12.7431839501649	12.5464261817653	12.6679967489315	12.313557043186
ENSG00000090020.11_SLC9A1	NA	12.3185354406101	11.4969058848027	11.5912596523439	11.3510158140518	12.0679845249269	12.5332813720564
ENSG00000090054.15_SPTLC1	NA	13.7982743683711	13.8200590096699	13.9845019016364	13.7802409316623	13.8648559902156	13.8503353291241
ENSG00000090060.18_PAPOLA	NA	14.7677237781966	15.3514764830139	14.2978082922767	15.4447828214972	14.5180270701868	15.3101362398461
ENSG00000090061.17_CCNK	NA	13.0474443526148	13.1048754000255	12.5280359115196	13.134709495833	12.7543211825463	13.2364798527304
ENSG00000090097.21_PCBP4	NA	10.826577466247	10.5593266526085	10.3800893342883	10.624233760309	10.5296676924196	10.7700078182623
ENSG00000090238.12_YPEL3	NA	9.97149972124801	10.6129139597386	10.0206348860226	10.5084980306794	9.69732419692356	9.75437024817442
ENSG00000090263.16_MRPS33	NA	12.8540648135038	12.0213469233167	14.0385442866873	11.8114958398676	13.5054427177905	12.4249448839153
ENSG00000090266.13_NDUFB2	NA	13.0225298599321	12.2019473255269	13.5532441553474	12.3371016935999	13.2040152500601	12.3838029999372
ENSG00000090273.14_NUDC	NA	14.3149479289835	14.1227438353305	13.8351446418343	14.3521177955086	14.2459895583831	14.4268973609717
ENSG00000090316.16_MAEA	NA	13.5439556039959	13.3711394761349	13.2382794686879	13.4436028867635	13.3674070866935	13.2951119104426
ENSG00000090339.9_ICAM1	NA	7.15641864943926	8.57882673346569	7.24519156079344	9.16204039342887	7.47288081738879	9.89207731535437
ENSG00000090372.15_STRN4	NA	13.8920743836983	14.122840041166	13.480241901237	14.2537544459202	13.8410624939418	14.1147991281558
ENSG00000090376.11_IRAK3	NA	-1	4.86051850023434	2.25080803793905	4.45383714145649	1.20641608165016	2.06384183801434
ENSG00000090382.6_LYZ	NA	5.2351731892997	6.21445287653312	6.32850443734603	5.92720791177635	5.97414987658843	5.95783217461331
ENSG00000090432.7_MUL1	NA	12.6100428280577	12.5302420280946	12.3081760230428	12.5805290246867	12.4155247024821	12.5530780133625
ENSG00000090447.12_TFAP4	NA	11.1773653107882	10.6709122080665	11.1489912917985	10.6714960312953	11.4317946796356	11.010367375804
ENSG00000090470.15_PDCD7	NA	12.3581380045725	12.0172124370573	12.0954183370811	12.1504738069242	12.1465854503011	12.2242599055772
ENSG00000090487.11_SPG21	NA	13.4426113604814	13.3036582270838	13.7454822919347	13.3435315287197	13.6581906704871	13.3775113782135
ENSG00000090520.11_DNAJB11	NA	14.3027289246306	14.363878920746	13.7866136701688	14.4902041062414	13.9171250166033	14.3828941269391
ENSG00000090530.10_P3H2	NA	11.7119636141689	10.7616892071558	10.8215506616706	10.7793019180229	10.7417466563606	11.1978104393569
ENSG00000090534.20_THPO	NA	5.58153381889173	5.62277558533674	5.88430571392619	5.37096293038352	5.72578103589589	5.9999310146713
ENSG00000090539.15_CHRD	NA	9.24388385173925	8.96619801681981	8.90916671546429	8.71437072337866	9.06733826768292	8.76744334192344
ENSG00000090554.13_FLT3LG	NA	2.60284416365316	2.39465370156298	0.646045912731413	1.29089905871014	1.68322706982405	2.06384183801434
ENSG00000090565.16_RAB11FIP3	NA	13.5692100128388	13.6072943567161	12.8630932709157	13.6424031212337	13.3619678709291	13.6103000572114
ENSG00000090581.10_GNPTG	NA	12.2645270328675	12.4240055973604	12.1809496519434	12.5421943767397	12.2521945581149	12.1754416107534
ENSG00000090612.21_ZNF268	NA	12.314067292511	13.230724117153	12.3259390914464	13.1966010711818	12.2123584338074	13.0988875065792
ENSG00000090615.15_GOLGA3	NA	14.1576409109242	14.6510834680482	13.0036590441494	14.7188375648709	13.5398996101605	14.6277877141748
ENSG00000090621.14_PABPC4	NA	13.6120207161169	13.197857921208	13.2507848453356	13.3897973908499	13.5676580444438	13.6768952037686
ENSG00000090659.18_CD209	NA	3.65292233452936	-1	2.78434487607049	-1	2.04098824485641	-1
ENSG00000090661.12_CERS4	NA	11.96895586302	12.3637373501524	12.2434323910225	12.125548176069	12.1537572675004	11.927740642252
ENSG00000090674.16_MCOLN1	NA	11.2945984399647	11.1064838591641	11.0239812210378	11.2623264782777	11.2632586505121	11.1194167356532
ENSG00000090686.16_USP48	NA	13.272875045267	13.0061107180108	12.8157220475722	12.9242777918456	12.8448386029714	13.0580619419507
ENSG00000090776.6_EFNB1	NA	10.5238121139714	9.32041650283648	10.0585846987836	9.36946704387363	10.3324225563724	9.9997365158897
ENSG00000090857.13_PDPR	NA	13.052817796575	13.3777655687478	12.3425990208323	13.4226534386972	12.7446641136427	13.4108071180048
ENSG00000090861.15_AARS	NA	14.9404729712498	14.5401984777778	14.6051783195675	14.4736953017836	14.9496893635084	15.1980877135221
ENSG00000090863.11_GLG1	NA	15.0975634451882	15.109190890386	14.3759735114822	15.1068221137962	14.6711659676164	15.1574341681702
ENSG00000090889.12_KIF4A	NA	13.8577229599245	13.5944475021312	13.103039205797	13.6155780363697	13.3431439670012	13.5576499613343
ENSG00000090905.19_TNRC6A	NA	13.2438739034607	13.4273714551453	12.3549689176837	13.4669835573516	12.8045791799707	13.5133746963882
ENSG00000090924.15_PLEKHG2	NA	12.0879644850162	12.6616021003533	11.6178996103861	12.5985287310585	11.9371030205102	12.2634016907283
ENSG00000090932.10_DLL3	NA	9.12407749658296	8.38195647660924	9.74615810632922	8.42673045767445	9.45318666687298	8.4482115018468
ENSG00000090971.5_NAT14	NA	11.7676164668865	10.7725223699016	11.7900242140422	10.689465629185	11.8059551773798	11.1932817465724
ENSG00000090975.12_PITPNM2	NA	9.49673507088746	9.14356919170503	9.24921466457827	9.25461135567041	9.61823521264485	10.0023276955692
ENSG00000090989.18_EXOC1	NA	11.821572371604	11.6027848715245	12.0000010413728	11.5815635085174	11.7946213777781	11.6637205993251
ENSG00000091009.8_RBM27	NA	11.9659433003267	12.3763815017232	11.7817577687547	12.4605839127546	11.8117702277628	12.630492732958
ENSG00000091010.6_POU4F3	NA	2.36336513754916	2.68888213318037	1.88542602307657	3.05088813838361	1.68322706982405	3.27834984296906
ENSG00000091039.17_OSBPL8	NA	13.2402766890445	13.927614705764	13.0152103997711	14.0697563750854	13.0370504023226	14.0156832314037
ENSG00000091073.19_DTX2	NA	10.2900758337084	10.6990597840054	9.7727451430904	10.9120386055114	10.2872240025092	10.9425034269409
ENSG00000091106.19_NLRC4	NA	5.19913829109337	5.72365671954267	4.97183447980234	5.64799149758076	5.12288373895234	4.6637219601316
ENSG00000091127.14_PUS7	NA	10.9956379344935	10.7744833259429	11.1360794773636	10.935891158098	11.4208976143215	11.3300354644955
ENSG00000091128.13_LAMB4	NA	2.60284416365316	3.99685448657254	0.646045912731413	1.77408377862989	0.489356241498477	2.06384183801434
ENSG00000091129.20_NRCAM	NA	11.5299275349323	11.5961477620731	10.4984483745943	11.8079751745445	10.8559021776	11.866481488502
ENSG00000091136.14_LAMB1	NA	14.0032687167396	14.1786040593306	13.3796156318214	14.1031765457028	13.6968040201427	14.1559637281852
ENSG00000091137.14_SLC26A4	NA	4.96169592171454	3.88513758306847	4.92202912039724	5.02778573487983	4.14343816954976	4.94804485599476
ENSG00000091138.12_SLC26A3	NA	1.23773309057468	2.68888213318037	-1	3.05088813838361	0.489356241498477	3.27834984296906
ENSG00000091140.14_DLD	NA	13.8551020197661	13.9781556235011	14.0479172144904	14.0722043164992	13.8534488360348	14.1214440485971
ENSG00000091157.13_WDR7	NA	11.7521555789126	11.4219492207845	11.0639986358862	11.3855442316134	11.3621734040097	11.9284220357125
ENSG00000091164.13_TXNL1	NA	13.753940638644	13.9931789611918	14.4861804990661	13.9733411788165	14.0846170655188	13.7830821964334
ENSG00000091262.15_ABCC6	NA	8.33083575436019	8.01485233203751	8.50629495239738	7.65120171409361	8.36409030207433	8.10671161602959
ENSG00000091317.8_CMTM6	NA	14.7575486427396	15.1227717212643	14.8005986974213	15.1369507247591	14.6144895801778	15.1445165630021
ENSG00000091409.15_ITGA6	NA	13.5985757244963	13.3917258135	13.0868851471879	13.3079701487348	13.501288021936	13.5237827001843
ENSG00000091428.18_RAPGEF4	NA	7.91376816338929	8.11110176637575	8.00637927218317	8.0878832873748	8.44862791579574	8.64676315445738
ENSG00000091436.17_MAP3K20	NA	12.496325202854	12.6040479085152	12.2262210841719	12.6627426118168	12.3390668385609	12.8114825971392
ENSG00000091483.6_FH	NA	13.6689108237982	12.6626612661492	13.8716797957437	12.7366185112294	13.7677003713398	13.3024897268579
ENSG00000091490.11_SEL1L3	NA	14.8420834249886	14.9831232053187	14.0722018439125	14.9252015479756	14.3041917086477	15.0338621342697
ENSG00000091513.16_TF	NA	4.45089343465466	4.80019713187699	4.21745153885783	4.89249172950281	4.68968567833438	4.16869534776854
ENSG00000091527.15_CDV3	NA	14.6386699209138	15.1739029258096	13.9282575312965	15.3278578477671	14.6162558985205	15.6603624334249
ENSG00000091536.19_MYO15A	NA	5.83737421801349	8.21294457375472	6.38474269996264	7.88303051078748	6.20377444563559	7.06539564840835
ENSG00000091542.9_ALKBH5	NA	13.94598475548	14.2400299781353	13.3504942015025	14.347679043572	13.6914915077782	14.2534686195713
ENSG00000091592.16_NLRP1	NA	5.08529646069359	6.84177450602906	4.51490120850092	6.90963511686474	5.29881181275606	5.79998690265534
ENSG00000091622.16_PITPNM3	NA	9.71180952783711	9.9603175767504	9.31822451138008	9.85063304007841	9.32893254559901	9.76813881369145
ENSG00000091640.8_SPAG7	NA	12.741911113783	12.6155798208641	12.6967329712314	12.5237117455874	12.5072975955235	12.4696349603649
ENSG00000091651.9_ORC6	NA	13.1091250072218	12.8560863096698	13.5037106975221	13.1519382012984	13.238693304345	12.8615765232468
ENSG00000091656.19_ZFHX4	NA	5.92822811862567	5.17747196015812	4.64339949666533	5.43728458805293	4.92248353867826	4.30926028307638
ENSG00000091704.10_CPA1	NA	-1	0.756704934741344	0.646045912731413	-1	1.20641608165016	-1
ENSG00000091732.16_ZC3HC1	NA	11.8527132177769	12.0704571541065	11.8068452174419	12.1393105338249	11.8828925047097	11.9584227800028
ENSG00000091831.23_ESR1	NA	13.2043706349631	13.2396237149682	12.8408590635049	13.1637699170436	13.0001249091972	13.0237199774956
ENSG00000091844.8_RGS17	NA	8.31408624412771	9.84188279680426	8.94701258669676	9.84147801711089	8.65679299119019	9.3810188678717
ENSG00000091879.13_ANGPT2	NA	3.29151283071405	4.28791805479047	4.51490120850092	4.1716266919799	4.34936550054092	3.83831471953006
ENSG00000091947.10_TMEM101	NA	4.56854660052181	5.4762587063889	5.53261477706341	5.97264110587286	5.29881181275606	4.76485140587716
ENSG00000091972.18_CD200	NA	0.515145658870156	0.756704934741344	-1	-1	1.20641608165016	0.506140336067499
ENSG00000091986.15_CCDC80	NA	8.58584200807141	8.48614226752238	8.6082313508507	8.41443516409812	8.58730043176111	8.06270024258658
ENSG00000092009.10_CMA1	NA	-1	0.756704934741344	1.39492385926443	-1	1.20641608165016	1.22681122250844
ENSG00000092010.15_PSME1	NA	13.7272052328563	13.133996729914	14.8782003260741	13.072653769067	14.4289674322768	13.2815760242169
ENSG00000092020.10_PPP2R3C	NA	11.2065864578058	11.9310537625849	11.9731222353985	12.1424201175107	11.5655794903425	11.457303927384
ENSG00000092036.18_HAUS4	NA	11.9008308190215	11.6654168265712	12.8269716528787	11.5149840953758	12.4240915838436	11.3611551466835
ENSG00000092051.17_JPH4	NA	3.14767234200784	2.02463226269727	1.39492385926443	2.13540673558656	1.68322706982405	2.06384183801434
ENSG00000092054.13_MYH7	NA	1.71695370984036	-1	-1	-1	-1	1.22681122250844
ENSG00000092067.5_CEBPE	NA	-1	-1	-1	-1	0.489356241498477	1.7051978671648
ENSG00000092068.20_SLC7A8	NA	10.1937894967251	10.4822350517717	10.0411933578602	10.3377911834412	10.1343572360354	10.2762066529336
ENSG00000092094.11_OSGEP	NA	12.6630879931884	11.5140253657952	12.9678642895464	11.4074232906907	12.8696161526034	12.4280801074281
ENSG00000092096.16_SLC22A17	NA	9.67620712290278	8.85939375335825	9.55516542067284	8.86352460210023	9.72378061040621	9.11740424871277
ENSG00000092098.17_RNF31	NA	11.7203304635811	11.2302349895031	11.1326623373044	11.2725805671092	11.4887130498032	11.5954278459979
ENSG00000092108.21_SCFD1	NA	12.8855826219851	12.4558202294993	13.0263017530482	12.4974802637971	12.8156544682155	12.5897223870142
ENSG00000092140.16_G2E3	NA	12.4577666433649	13.0960819314256	12.8754127192472	13.1182205001849	12.6063919387752	12.9694655919289
ENSG00000092148.13_HECTD1	NA	14.2104971778022	14.5595893316857	13.1899424780176	14.5764800860706	13.6323413446083	14.5613040357205
ENSG00000092199.17_HNRNPC	NA	17.2401461907298	16.554850483741	18.0081266213832	16.617917381013	17.6988874129703	16.7770207535354
ENSG00000092200.12_RPGRIP1	NA	6.29549579501854	7.02424609915671	6.47385977793221	6.69600297817118	6.37064325487174	6.87493438203729
ENSG00000092201.10_SUPT16H	NA	15.5132551674151	15.4865767827388	14.7902255644176	15.5686268435133	15.1236899512404	15.5247227886158
ENSG00000092203.14_TOX4	NA	13.4308850539416	13.5947249856343	13.4271144468587	13.60952359193	13.3909047599329	13.5351230735976
ENSG00000092208.17_GEMIN2	NA	12.1378945474358	11.7203651074882	13.5051648981167	11.8239446352514	12.9030263070109	11.8703873427697
ENSG00000092295.12_TGM1	NA	7.4372922222699	8.5470600506992	7.00320647154523	8.55174647456005	7.10727342618816	8.09218982948862
ENSG00000092330.18_TINF2	NA	12.5880051020836	12.4067254246417	12.6615976481826	12.440007737858	12.5374400118477	12.3735817624779
ENSG00000092345.13_DAZL	NA	-1	0.756704934741344	1.88542602307657	-1	-1	-1
ENSG00000092421.16_SEMA6A	NA	9.5115029505589	9.40891797518244	9.3538795577696	9.44394380038433	9.41358354125048	9.71857506258386
ENSG00000092439.16_TRPM7	NA	13.4081294064384	14.0225580565786	13.2680187994651	14.0834925506418	13.2955644875398	14.0005346093676
ENSG00000092445.12_TYRO3	NA	12.607037900097	12.3898754798853	12.0659815771575	12.3463003193652	12.4085864159731	12.4052550340444
ENSG00000092470.12_WDR76	NA	12.9047624419851	12.6525676567149	12.7008922817813	12.5926295342776	12.6076459922434	12.6440382016234
ENSG00000092529.24_CAPN3	NA	4.02638871617658	4.67141626018303	4.29775785636771	3.48638317684589	3.71737006492186	3.83831471953006
ENSG00000092531.10_SNAP23	NA	13.5537983981747	13.5700998142675	14.3656765157231	13.5634027861268	13.9064650057548	13.4352242179621
ENSG00000092607.15_TBX15	NA	5.90604538676313	6.88597804423957	5.56542742988981	6.73607534768041	5.45559944391865	6.28170979065322
ENSG00000092621.12_PHGDH	NA	15.4554782952352	16.0574472359878	15.644415236178	16.0931764714972	15.7764232131661	16.0374483617209
ENSG00000092758.18_COL9A3	NA	8.30986830487019	8.50987756232042	8.227516865417	8.46299985349223	8.48910886659802	8.41358915991949
ENSG00000092820.18_EZR	NA	16.6953648556635	16.1712908045914	15.7429518248887	16.0100743215342	15.733366144484	15.8392672868541
ENSG00000092841.18_MYL6	NA	17.1443706346038	16.7216039011703	17.8959122828455	16.6939847251663	17.5331968246253	16.8625333519939
ENSG00000092847.12_AGO1	NA	13.3932555397618	13.8853682159095	12.6306814149548	13.9322488795395	13.1465059003429	14.0041751159304
ENSG00000092850.12_TEKT2	NA	10.6509704665215	10.3372034464826	11.1154541656402	10.4179900583154	11.2905837027353	10.7228679230079
ENSG00000092853.14_CLSPN	NA	13.271384523052	13.3333937222034	12.1629717846429	13.4310697579403	12.5359038414031	13.2342771684717
ENSG00000092871.16_RFFL	NA	12.2845477328911	12.8913012829563	11.6450162832428	12.8906466460836	11.7846769327425	12.8403720441276
ENSG00000092929.11_UNC13D	NA	9.4629440372351	9.10357041812325	7.75935089357881	8.8904071358066	7.81730835575615	7.99665993049876
ENSG00000092931.11_MFSD11	NA	11.5317396598563	11.8557205906582	11.4413280338195	11.9626972251777	11.2174473151274	11.5937106293837
ENSG00000092964.18_DPYSL2	NA	12.6635012817857	13.3599190800725	12.1914984394024	13.1709444709157	12.3525932528644	13.133723026479
ENSG00000092969.12_TGFB2	NA	9.84457694374134	10.6959592582882	9.73718575339651	10.5065686664852	9.70359302439594	10.2082532276764
ENSG00000092978.11_GPATCH2	NA	11.6394457207373	11.8200899696932	11.5203342073321	11.8949883707716	11.5582475087702	11.8693231580625
ENSG00000093000.19_NUP50	NA	13.9129078389118	13.9996896984084	13.2904262189964	14.1313865443039	13.5393521000156	14.0725795097917
ENSG00000093009.10_CDC45	NA	12.9169466476312	12.090272417209	12.8223126495173	12.1547918585878	12.7516766528551	12.1361647085535
ENSG00000093010.13_COMT	NA	13.7038881006201	13.6798404263684	13.6908816385244	13.7234398420899	13.7251005902004	13.56686951296
ENSG00000093072.18_ADA2	NA	2.98788607713756	2.02463226269727	2.99170115686585	1.29089905871014	1.20641608165016	2.06384183801434
ENSG00000093100.13_AC016026.1	NA	10.307104781914	10.7052409165469	10.1123136399392	10.8668816196787	10.5498142942409	11.0584713006417
ENSG00000093134.14_VNN3	NA	-1	2.02463226269727	-1	-1	-1	1.22681122250844
ENSG00000093144.19_ECHDC1	NA	12.2395198743497	12.2517136932501	12.245964840925	12.3108079682294	12.1862960459601	12.2869715349813
ENSG00000093167.18_LRRFIP2	NA	12.3690751990022	12.303559825173	11.905452389614	12.4563421667478	11.9874245885643	12.2601575780688
ENSG00000093183.14_SEC22C	NA	13.0217241585283	13.4110774683093	12.8965203514661	13.38691606344	12.8287977063354	13.198992633876
ENSG00000093217.11_XYLB	NA	10.0507287878599	9.71897123918563	10.0397345716121	9.92330108699313	10.1482121670846	10.2415337569874
ENSG00000094631.21_HDAC6	NA	12.4856135785648	13.059357121059	12.0160395662469	12.9826979647236	12.2519272464933	12.5843279532294
ENSG00000094661.3_OR1I1	NA	2.07606432475589	-1	-1	-1	1.68322706982405	-1
ENSG00000094755.17_GABRP	NA	6.09438609326068	6.6154373017478	6.12343379718047	6.90963511686474	5.39491341216589	6.75713960692179
ENSG00000094804.12_CDC6	NA	14.0039216108494	13.5689704389627	13.6456866794525	13.7155275209758	13.7371826077271	13.7805371022865
ENSG00000094841.14_UPRT	NA	10.7375239237793	11.1095940883663	10.9843395126397	11.0627647157254	10.6913803717506	10.8923963130994
ENSG00000094880.11_CDC23	NA	13.3408598179564	13.3293975283529	12.9295843214091	13.3534946402125	13.0238032126045	13.3076056519229
ENSG00000094914.14_AAAS	NA	12.7318965009277	11.636598472779	12.5327103199148	11.4917651382951	12.7270783366981	12.430487190009
ENSG00000094916.16_CBX5	NA	15.874094718997	16.6543107823104	14.9681323144737	16.5721693228401	15.2913220860375	16.4175145350899
ENSG00000094963.14_FMO2	NA	1.71695370984036	0.756704934741344	-1	-1	0.489356241498477	-1
ENSG00000094975.14_SUCO	NA	13.1515798940251	13.7699516774321	12.9950285177581	13.688126110229	12.8622800024809	13.5913859130614
ENSG00000095002.14_MSH2	NA	13.9260575203761	13.7297112909028	13.8345137931953	13.8162214244424	13.8755665005464	13.8398702129639
ENSG00000095015.6_MAP3K1	NA	13.0691310622286	12.6802876656673	12.6916330307962	12.4580902786811	12.6977418302776	12.5526361156743
ENSG00000095059.16_DHPS	NA	12.3276912242489	11.9803087813978	12.852538386856	11.9349899019114	12.7580906928556	12.0903186172197
ENSG00000095066.11_HOOK2	NA	12.501420175099	12.507726509776	12.1766420771441	12.5061967294135	12.4354355293197	12.4422241879007
ENSG00000095110.8_NXPE1	NA	-1	-1	0.646045912731413	-1	-1	0.506140336067499
ENSG00000095139.14_ARCN1	NA	15.4982157150442	15.447319848162	15.1690607756606	15.4940885580779	15.2711183521167	15.5939482100832
ENSG00000095203.14_EPB41L4B	NA	11.4309596292157	11.5157848072127	11.0959341501812	11.5221640463332	11.2081078618112	11.5992841263643
ENSG00000095209.12_TMEM38B	NA	11.7633812132585	11.9687941817529	12.4345531055322	12.0704537259399	12.1457224314912	12.0076154362217
ENSG00000095261.14_PSMD5	NA	13.7380374083431	13.8531411306684	13.4378145386816	13.9273896536252	13.5014004684721	13.8555395569807
ENSG00000095303.17_PTGS1	NA	8.68035967955015	7.9188293421719	8.6623190183456	8.00830672568655	8.7566402444085	8.32528492411224
ENSG00000095319.14_NUP188	NA	14.280739903109	14.354733138115	13.5164838558082	14.6358254579681	14.0409581606754	14.5620177508049
ENSG00000095321.17_CRAT	NA	11.7369199849439	11.9319325383454	11.4621696988408	11.9464214548833	11.7150183335568	11.7747354420972
ENSG00000095370.20_SH2D3C	NA	5.37093462589082	6.32562063280382	5.83132721711074	6.37919132294033	5.79786686866912	5.75152368689837
ENSG00000095380.11_NANS	NA	12.6177411681079	11.9610664065015	12.1454454212215	12.0586511694371	12.3982367993367	12.1990693418129
ENSG00000095383.20_TBC1D2	NA	11.4138661067665	11.1080398119122	10.8257889751218	11.0758355739868	11.2250934900314	10.9465454539095
ENSG00000095397.14_WHRN	NA	9.31084346410897	9.87333060860983	9.46239218337457	9.88816571173977	9.83360594780278	9.85097790012827
ENSG00000095464.10_PDE6C	NA	3.14767234200784	3.99685448657254	3.33397612761004	2.13540673558656	3.71737006492186	3.7423767631696
ENSG00000095485.18_CWF19L1	NA	12.5028065958636	12.231156177799	13.0956869584136	12.2558765411936	12.7448540905896	12.2784451694426
ENSG00000095539.15_SEMA4G	NA	9.60741749534063	10.0966584885101	9.46456829438523	10.1515671830352	9.85769740531622	10.0506959801787
ENSG00000095564.14_BTAF1	NA	12.7415196907113	13.1402834739707	12.4661203640109	13.240212983916	12.6516757047698	13.2668347491779
ENSG00000095574.11_IKZF5	NA	11.7127625508129	12.3552459282805	12.0844940349993	12.4039257742076	11.9523188355818	12.2503812398895
ENSG00000095585.16_BLNK	NA	9.53156506959351	9.51359156800045	9.4315768712147	9.14477757303124	9.16370204489817	9.17595910213457
ENSG00000095587.9_TLL2	NA	7.82196932523965	7.75370157922366	7.93284072084453	7.82227997540887	8.49273324587389	8.07259723239276
ENSG00000095596.12_CYP26A1	NA	5.2351731892997	5.4762587063889	5.85805963571011	5.15147276318625	6.61636327149228	5.79998690265534
ENSG00000095627.9_TDRD1	NA	2.07606432475589	1.52569523028648	2.25080803793905	1.77408377862989	1.68322706982405	2.79529286833288
ENSG00000095637.22_SORBS1	NA	8.3678259427553	9.38601435349381	8.07064739929891	9.68649783849815	7.91778673294339	9.41836371538743
ENSG00000095713.14_CRTAC1	NA	4.77847218357551	5.07935936208192	4.13241017613544	5.40450483204493	4.14343816954976	5.07162703059766
ENSG00000095739.11_BAMBI	NA	8.19105657201345	6.74908429156488	8.13217423962467	7.043402794004	7.96551798301909	7.48403843324496
ENSG00000095752.7_IL11	NA	5.63646037300286	6.38842895942756	5.6896883408744	6.29227000245523	5.5970058215378	6.28170979065322
ENSG00000095787.23_WAC	NA	14.726931498689	14.7424515248295	14.5324893656476	14.8253192884307	14.5835955195842	14.8307169151136
ENSG00000095794.19_CREM	NA	10.9943243263946	11.8004964064351	11.691742065788	11.9385720021923	11.2754086086149	11.4737354796919
ENSG00000095906.17_NUBP2	NA	13.4414068599333	13.2982162833374	13.7069400282	13.4076118557963	13.8214708757274	13.3263396068612
ENSG00000095917.14_TPSD1	NA	1.71695370984036	2.93315015163294	2.78434487607049	2.66457719062308	2.77119432927765	1.7051978671648
ENSG00000095932.7_SMIM24	NA	10.3426373831285	8.93146777582461	11.181766486852	8.91679790182203	11.1241390509415	9.92795531585152
ENSG00000095951.17_HIVEP1	NA	10.5401084211113	11.812952423975	10.0600245580846	12.1701088180014	10.7132925343673	12.1834557398561
ENSG00000096006.11_CRISP3	NA	5.304650257706	6.84177450602906	5.39334965148107	6.5833602067478	5.19584887138141	6.08061336294541
ENSG00000096060.14_FKBP5	NA	12.5197971296508	12.4111436896522	12.719689968219	12.9870288177421	12.4025782353195	12.7949510473489
ENSG00000096063.16_SRPK1	NA	13.9790675718758	14.4006074284422	13.7237303912921	14.499389010597	13.8609175585485	14.3728541699935
ENSG00000096070.19_BRPF3	NA	12.8448016451005	12.893107355373	11.9402705402668	12.8086577473578	12.3448436009046	13.1052293365521
ENSG00000096080.11_MRPS18A	NA	12.1658772462136	11.8722959580886	12.2601276309831	11.9187594669558	12.1387996325173	12.0233282779439
ENSG00000096088.16_PGC	NA	0.515145658870156	-1	-1	-1	-1	0.506140336067499
ENSG00000096092.6_TMEM14A	NA	12.3971795355019	11.9649354683356	13.6027395282833	11.8316709344141	12.9414934964968	11.852547625162
ENSG00000096093.16_EFHC1	NA	11.3587858950174	11.7315118457463	12.3220439376409	11.6065477241887	12.0385316877078	11.8607813023863
ENSG00000096384.20_HSP90AB1	NA	18.1164704741087	17.9119078090946	17.7382279184566	18.1016860369486	18.0302318480407	18.2868709530977
ENSG00000096401.8_CDC5L	NA	14.0728277501523	14.0213199945607	13.6857609347433	14.0089576060011	13.7782262431581	13.9544448835891
ENSG00000096433.11_ITPR3	NA	13.6927954634746	14.0907386647231	12.9037554772878	14.2197857418407	13.5416502476287	14.0478650339921
ENSG00000096654.15_ZNF184	NA	11.5362600389372	11.5442227044133	11.0298713745344	11.4381144970977	11.0970127547296	11.5937106293837
ENSG00000096696.14_DSP	NA	14.7837326283919	15.041541110586	13.941402934581	15.2021423050459	14.5169707230908	15.2761449800116
ENSG00000096717.12_SIRT1	NA	12.2877683123479	12.7462197218995	11.6464546778242	12.7540030199911	11.8312247608117	12.7412829617027
ENSG00000096746.17_HNRNPH3	NA	14.259094360554	14.7340998537994	13.8965737892121	14.7195664744883	14.0461318691829	14.6304597563134
ENSG00000096872.16_IFT74	NA	10.9118443134864	10.8711145082963	10.9310424556726	10.6585221738605	10.6834732378528	10.6951083400487
ENSG00000096968.13_JAK2	NA	10.210855764218	10.0553186180838	9.99827792353187	9.93912320897426	9.94759254010306	10.1521877843624
ENSG00000096996.16_IL12RB1	NA	2.80817268973273	0.756704934741344	1.39492385926443	0.559151537014313	-1	2.5901164547137
ENSG00000097007.19_ABL1	NA	13.6736374254864	14.1566879894439	12.9415464345057	14.1790291739313	13.4059995721955	14.0519354615718
[truncated: 35,834 more rows]
