# Supplementary material for: Chromatin topology defines estradiol-primed progesterone receptor and PAX2 binding in endometrial cancer cells
Source: eLife journal article supplement (doi:10.7554/elife.66034), 2022-01-12
Supplement: supp [file elife-66034-supp-v1.zip › elife_poa_e66034_Figure_1_source_data_4.csv]

Sample	Ct value1	Ct value2	Ct value3
T0	28,93	28,19	30,24
R5	27,28		29,8
R30	24,92		29,58
R60	25,25	27,14	29,95
IgG	29,95		30,9
T0 input	25,57	24,18	25,43
R5 input	25,73		25,01
R30 input	25,43		25,18
R60 input	25,54	25,02	25,67
IgG input	25,63		26,5
