# Supplementary material for: Chromatin topology defines estradiol-primed progesterone receptor and PAX2 binding in endometrial cancer cells
Source: eLife journal article supplement (doi:10.7554/elife.66034), 2022-01-12
Supplement: supp [file elife-66034-supp-v1.zip › elife_poa_e66034_Figure_5_source_data_1.csv]

gene	treatment	pretreatment	siRNA	condition	Ct_gene	Ct_housek	deltaCt	avg.deltaCt	SD.deltaCt	SEM.deltaCt	deltadeltaCt	SDdeltadeltaCt	SEMdeltadeltaCt	fold.change	avgfoldchange
tgfa prom	T0	E2	ctrl	T0 - ctrl	39.32	30.01	9.31	9.956666667	0.688210239	0.397338367	-0.646666667	0.688210239	0.397338367	1.565546833	1.075273944
tgfa prom	T0	E2	ctrl	T0 - ctrl	40.14	29.46	10.68				0.723333333			0.605696368
tgfa prom	T0	E2	ctrl	T0 - ctrl	40.12	30.24	9.88				-0.076666667			1.05457863
tgfa prom	R5020	E2	ctrl	R5020 - ctrl	40.34	31.57	8.77	9.476666667	0.637913265	0.368299395	-1.186666667	0.637913265	0.368299395	2.276262069	1.492271954
tgfa prom	R5020	E2	ctrl	R5020 - ctrl	40	29.99	10.01				0.053333333			0.963707118
tgfa prom	R5020	E2	ctrl	R5020 - ctrl	40.32	30.67	9.65				-0.306666667			1.236846673
tgfa prom	T0	E2	pax2	T0 - pax2	39.62	29.5	10.12	10.65	1.014741346	0.585861189	0.163333333	1.014741346	0.585861189	0.892959511	0.710502386
tgfa prom	T0	E2	pax2	T0 - pax2	42.34	30.52	11.82				1.863333333			0.274840528
tgfa prom	T0	E2	pax2	T0 - pax2	41.66	31.65	10.01				0.053333333			0.963707118
tgfa prom	R5020	E2	pax2	R5020 - pax2	38.08	29.04	9.04	9.376666667	0.726108348	0.41921885	-0.916666667	0.726108348	0.41921885	1.887748625	1.611953886
tgfa prom	R5020	E2	pax2	R5020 - pax2	38.46	29.58	8.88				-1.076666667			2.109157259
tgfa prom	R5020	E2	pax2	R5020 - pax2	41.19	30.98	10.21				0.253333333			0.838955775
tgfa enh1	T0	E2	ctrl	T0 - ctrl	33.02	30.01	3.01	2.163333333	0.736568621	0.425258092	0.846666667	0.736568621	0.425258092	0.556068043	1.080423506
tgfa enh1	T0	E2	ctrl	T0 - ctrl	31.13	29.46	1.67				-0.493333333			1.407693584
tgfa enh1	T0	E2	ctrl	T0 - ctrl	32.05	30.24	1.81				-0.353333333			1.277508892
tgfa enh1	R5020	E2	ctrl	R5020 - ctrl	33.05	31.57	1.48	0.996666667	0.50639247	0.292365829	-0.683333333	0.50639247	0.292365829	1.605845764	2.339457895
tgfa enh1	R5020	E2	ctrl	R5020 - ctrl	31.03	29.99	1.04				-1.123333333			2.178497312
tgfa enh1	R5020	E2	ctrl	R5020 - ctrl	31.14	30.67	0.47				-1.693333333			3.234030609
tgfa enh1	T0	E2	pax2	T0 - pax2	31.92	29.5	2.42	2.713333333	0.349475798	0.201769946	0.256666667	0.349475798	0.201769946	0.837019613	0.696042028
tgfa enh1	T0	E2	pax2	T0 - pax2	33.14	30.52	2.62				0.456666667			0.728667896
tgfa enh1	T0	E2	pax2	T0 - pax2	34.75	31.65	3.1				0.936666667			0.522438576
tgfa enh1	R5020	E2	pax2	R5020 - pax2	29.67	29.04	0.63	0.803333333	0.483873262	0.279364358	-1.533333333	0.483873262	0.279364358	2.894538475	2.658918988
tgfa enh1	R5020	E2	pax2	R5020 - pax2	30.93	29.58	1.35				-0.813333333			1.757266904
tgfa enh1	R5020	E2	pax2	R5020 - pax2	31.41	30.98	0.43				-1.733333333			3.324951585
tgfa enh2	T0	E2	ctrl	T0 - ctrl	33.33	30.01	3.32	2.253333333	0.974388697	0.562563577	1.066666667	0.974388697	0.562563577	0.477420802	1.146346474
tgfa enh2	T0	E2	ctrl	T0 - ctrl	31.49	29.46	2.03				-0.223333333			1.167427804
tgfa enh2	T0	E2	ctrl	T0 - ctrl	31.65	30.24	1.41				-0.843333333			1.794190818
tgfa enh2	R5020	E2	ctrl	R5020 - ctrl	34.54	31.57	2.97	1.636666667	1.203716467	0.694966026	0.716666667	1.203716467	0.694966026	0.608501757	1.870776102
tgfa enh2	R5020	E2	ctrl	R5020 - ctrl	31.3	29.99	1.31				-0.943333333			1.922966105
tgfa enh2	R5020	E2	ctrl	R5020 - ctrl	31.3	30.67	0.63				-1.623333333			3.080860445
tgfa enh2	T0	E2	pax2	T0 - pax2	32.85	29.5	3.35	3.54	0.559732079	0.323161466	1.096666667	0.559732079	0.323161466	0.467595624	0.429509813
tgfa enh2	T0	E2	pax2	T0 - pax2	34.69	30.52	4.17				1.916666667			0.264865774
tgfa enh2	T0	E2	pax2	T0 - pax2	34.75	31.65	3.1				0.846666667			0.556068043
tgfa enh2	R5020	E2	pax2	R5020 - pax2	28.71	29.04	-0.33	-0.24	0.501098793	0.289309523	-2.583333333	0.501098793	0.289309523	5.993228308	5.852591837
tgfa enh2	R5020	E2	pax2	R5020 - pax2	29.88	29.58	0.3				-1.953333333			3.872682784
tgfa enh2	R5020	E2	pax2	R5020 - pax2	30.29	30.98	-0.69				-2.943333333			7.69186442
tiparp prom	T0	E2	ctrl	T0 - ctrl	33.1	30.01	3.09	3.34	0.221133444	0.127671453	-0.25	0.221133444	0.127671453	1.189207115	1.008035814
tiparp prom	T0	E2	ctrl	T0 - ctrl	32.88	29.46	3.42				0.08			0.946057647
tiparp prom	T0	E2	ctrl	T0 - ctrl	33.75	30.24	3.51				0.17			0.888842681
tiparp prom	R5020	E2	ctrl	R5020 - ctrl	33.23	31.57	1.66	0.94	0.757429865	0.437302336	-1.68	0.757429865	0.437302336	3.20427951	5.786147578
tiparp prom	R5020	E2	ctrl	R5020 - ctrl	31	29.99	1.01				-2.33			5.028053498
tiparp prom	R5020	E2	ctrl	R5020 - ctrl	30.82	30.67	0.15				-3.19			9.126109727
tiparp prom	T0	E2	pax2	T0 - pax2	32.15	29.5	2.65	3.333333333	0.811315804	0.468413398	-0.69	0.811315804	0.468413398	1.613283518	1.105877074
tiparp prom	T0	E2	pax2	T0 - pax2	34.75	30.52	4.23				0.89			0.539614118
tiparp prom	T0	E2	pax2	T0 - pax2	34.77	31.65	3.12				-0.22			1.164733586
tiparp prom	R5020	E2	pax2	R5020 - pax2	28.79	29.04	-0.25	-0.19	0.324191302	0.187171935	-3.59	0.324191302	0.187171935	12.04197398	11.74276433
tiparp prom	R5020	E2	pax2	R5020 - pax2	29.74	29.58	0.16				-3.18			9.063071082
tiparp prom	R5020	E2	pax2	R5020 - pax2	30.5	30.98	-0.48				-3.82			14.12324794
neg	T0	E2	ctrl	T0 - ctrl	39.54	30.01	9.53	9.633333333	0.405010288	0.233832799	-0.103333333	0.405010288	0.233832799	1.074252648	1.025557774
neg	T0	E2	ctrl	T0 - ctrl	38.75	29.46	9.29				-0.343333333			1.268684494
neg	T0	E2	ctrl	T0 - ctrl	40.32	30.24	10.08				0.446666667			0.733736182
neg	R5020	E2	ctrl	R5020 - ctrl	41.48	31.57	9.91	10.03	0.365102725	0.210792157	0.276666667	0.365102725	0.210792157	0.825496117	0.77530959
neg	R5020	E2	ctrl	R5020 - ctrl	39.73	29.99	9.74				0.106666667			0.92873141
neg	R5020	E2	ctrl	R5020 - ctrl	41.11	30.67	10.44				0.806666667			0.571701243
neg	T0	E2	pax2	T0 - pax2	38.13	29.5	8.63	9.673333333	0.918495146	0.53029342	-1.003333333	0.918495146	0.53029342	2.004626324	1.122845395
neg	T0	E2	pax2	T0 - pax2	40.55	30.52	10.03				0.396666667			0.759611332
neg	T0	E2	pax2	T0 - pax2	42.01	31.65	10.36				0.726666667			0.604298528
neg	R5020	E2	pax2	R5020 - pax2	38.81	29.04	9.77	9.51	0.530188646	0.306104557	0.136666667	0.530188646	0.306104557	0.909618394	1.142233787
neg	R5020	E2	pax2	R5020 - pax2	39.44	29.58	9.86				0.226666667			0.854607174
neg	R5020	E2	pax2	R5020 - pax2	39.88	30.98	8.9				-0.733333333			1.662475792
