# Supplementary material for: Chromatin topology defines estradiol-primed progesterone receptor and PAX2 binding in endometrial cancer cells
Source: eLife journal article supplement (doi:10.7554/elife.66034), 2022-01-12
Supplement: supp [file elife-66034-supp-v1.zip › elife_poa_e66034_Figure_5_source_data_2.csv]

gene	treatment	replicate	pretreatment	siRNA	condition	condition_v2	Ct gene	Ct housek	deltaCt	2deltaCt	avg deltaCt	SD deltaCt	SEM deltaCt	2 SEMdeltaCt	deltadeltaCt	SD.deltadeltaCt	SEM.deltadeltaCt	fold change	avg.foldchange
ALPP	T0	1	no E2	ctrl	T0 - no E2	T0 - no E2 - ctrl	29.46	21.3	8.16	0.003496192	8.783333333	0.753016157	0.434754081	0.739819852	-0.623333333	0.753016157	0.434754081	1.540430222	1.086576605
ALPP	T0	2	no E2	ctrl	T0 - no E2	T0 - no E2 - ctrl	28.47	18.85	9.62	0.001270842					0.836666667			0.559935802
ALPP	T0	3	no E2	ctrl	T0 - no E2	T0 - no E2 - ctrl	27.9	19.33	8.57	0.002631316					-0.213333333			1.159363791
ALPP	R5020	1	no E2	ctrl	R5020 - no E2	R5020 - no E2 - ctrl	28.43	20.55	7.88	0.004245058	6.99	0.961613228	0.555187656	0.680568529	-0.903333333	0.961613228	0.555187656	1.870382496	4.022308445
ALPP	R5020	2	no E2	ctrl	R5020 - no E2	R5020 - no E2 - ctrl	27	19.88	7.12	0.007188966					-1.663333333			3.167475221
ALPP	R5020	3	no E2	ctrl	R5020 - no E2	R5020 - no E2 - ctrl	24.98	19.01	5.97	0.015953314					-2.813333333			7.029067618
ALPP	T0	1	E2	ctrl	T0 - E2	T0 - E2 - ctrl	24.19	19.85	4.34	0.049377582	4.263333333	0.638461693	0.36861603	0.774525138	-4.443333333	0.638461693	0.36861603	21.75587797	24.50556468
ALPP	T0	2	E2	ctrl	T0 - E2	T0 - E2 - ctrl	25.67	20.81	4.86	0.034434535					-3.923333333			15.1719365
ALPP	T0	3	E2	ctrl	T0 - E2	T0 - E2 - ctrl	24.04	20.45	3.59	0.083042863					-5.193333333			36.58887958
ALPP	R5020	1	E2	ctrl	R5020 - E2	R5020 - E2 - ctrl	24.75	21.18	3.57	0.084202099	3.73	0.19	0.109696551	0.926782976	-5.213333333	0.19	0.109696551	37.09964131	33.39425971
ALPP	R5020	2	E2	ctrl	R5020 - E2	R5020 - E2 - ctrl	24.6	20.92	3.68	0.078020659					-5.103333333			34.37608474
ALPP	R5020	3	E2	ctrl	R5020 - E2	R5020 - E2 - ctrl	23.83	19.89	3.94	0.06515411					-4.843333333			28.70705308
ALPP	T0	1	no E2	pax2	T0 - no E2	T0 - no E2 - pax2	31.11	19.62	11.49	0.000347669	9.883333333	1.540010822	0.889125663	0.539941247	2.706666667	1.540010822	0.889125663	0.153183555	0.651608078
ALPP	T0	2	no E2	pax2	T0 - no E2	T0 - no E2 - pax2	29.93	20.19	9.74	0.001169413					0.956666667			0.51524601
ALPP	T0	3	no E2	pax2	T0 - no E2	T0 - no E2 - pax2	28.04	19.62	8.42	0.002919627					-0.363333333			1.286394669
ALPP	R5020	1	no E2	pax2	R5020 - no E2	R5020 - no E2 - pax2	29.28	19.68	9.6	0.001288582	9.246666667	1.403756864	0.810459403	0.570200258	0.816666667	1.403756864	0.810459403	0.567752215	1.001283176
ALPP	R5020	2	no E2	pax2	R5020 - no E2	R5020 - no E2 - pax2	30.48	20.04	10.44	0.000719858					1.656666667			0.317171123
ALPP	R5020	3	no E2	pax2	R5020 - no E2	R5020 - no E2 - pax2	27.56	19.86	7.7	0.004809158					-1.083333333			2.118926189
ALPP	T0	1	E2	pax2	T0 - E2	T0 - E2 - pax2	26.16	20.24	5.92	0.016515907	5.246666667	0.781302332	0.451085111	0.731492455	-2.863333333	0.781302332	0.451085111	7.276947152	12.83727039
ALPP	T0	2	E2	pax2	T0 - E2	T0 - E2 - pax2	25.5	21.11	4.39	0.0476956					-4.393333333			21.01479289
ALPP	T0	3	E2	pax2	T0 - E2	T0 - E2 - pax2	23.59	18.16	5.43	0.023195681					-3.353333333			10.22007114
ALPP	R5020	1	E2	pax2	R5020 - E2	R5020 - E2 - pax2	24.91	20.82	4.09	0.058720172	4.15	0.314324673	0.181475435	0.881800723	-4.693333333	0.314324673	0.181475435	25.87224487	25.20467084
ALPP	R5020	2	E2	pax2	R5020 - E2	R5020 - E2 - pax2	24.68	20.19	4.49	0.044501569					-4.293333333			19.60749508
ALPP	R5020	3	E2	pax2	R5020 - E2	R5020 - E2 - pax2	24.15	20.28	3.87	0.068393356					-4.913333333			30.13427256
TIPARP	T0	1	no E2	ctrl	T0 - no E2	T0 - no E2 - ctrl	27.26	21.3	5.96	0.016064279	7.326666667	1.193035345	0.688799277	0.620369955	-1.366666667	1.193035345	0.688799277	2.578740617	1.276976027
TIPARP	T0	2	no E2	ctrl	T0 - no E2	T0 - no E2 - ctrl	27.01	18.85	8.16	0.003496192					0.833333333			0.561231024
TIPARP	T0	3	no E2	ctrl	T0 - no E2	T0 - no E2 - ctrl	27.19	19.33	7.86	0.004304317					0.533333333			0.69095644
TIPARP	R5020	1	no E2	ctrl	R5020 - no E2	R5020 - no E2 - ctrl	26.64	20.55	6.09	0.014680043	6.16	0.627933117	0.362537354	0.77779542	-1.236666667	0.627933117	0.362537354	2.356534278	2.38548757
TIPARP	R5020	2	no E2	ctrl	R5020 - no E2	R5020 - no E2 - ctrl	25.45	19.88	5.57	0.021050525					-1.756666667			3.379164695
TIPARP	R5020	3	no E2	ctrl	R5020 - no E2	R5020 - no E2 - ctrl	25.83	19.01	6.82	0.008850655					-0.506666667			1.420763739
TIPARP	T0	1	E2	ctrl	T0 - E2	T0 - E2 - ctrl	25.53	19.85	5.68	0.019505165	5.656666667	0.215947524	0.124677361	0.917209141	-1.646666667	0.215947524	0.124677361	3.131093665	3.206146097
TIPARP	T0	2	E2	ctrl	T0 - E2	T0 - E2 - ctrl	26.24	20.81	5.43	0.023195681					-1.896666667			3.723518864
TIPARP	T0	3	E2	ctrl	T0 - E2	T0 - E2 - ctrl	26.31	20.45	5.86	0.017217267					-1.466666667			2.76382576
TIPARP	R5020	1	E2	ctrl	R5020 - E2	R5020 - E2 - ctrl	26.19	21.18	5.01	0.03103414	6.3	1.614094173	0.931897705	0.524168403	-2.316666667	1.614094173	0.931897705	4.981798489	2.828078324
TIPARP	R5020	2	E2	ctrl	R5020 - E2	R5020 - E2 - ctrl	26.7	20.92	5.78	0.018198962					-1.546666667			2.921413689
TIPARP	R5020	3	E2	ctrl	R5020 - E2	R5020 - E2 - ctrl	28	19.89	8.11	0.003619485					0.783333333			0.581022793
TIPARP	T0	1	no E2	pax2	T0 - no E2	T0 - no E2 - pax2	27.15	19.62	7.53	0.005410584	6.526666667	0.870651097	0.502670645	0.705799031	0.203333333	0.870651097	0.502670645	0.868541486	1.93413157
TIPARP	T0	2	no E2	pax2	T0 - no E2	T0 - no E2 - pax2	26.27	20.19	6.08	0.014782151					-1.246666667			2.37292527
TIPARP	T0	3	no E2	pax2	T0 - no E2	T0 - no E2 - pax2	25.59	19.62	5.97	0.015953314					-1.356666667			2.560927954
TIPARP	R5020	1	no E2	pax2	R5020 - no E2	R5020 - no E2 - pax2	26.54	19.68	6.86	0.008608634	5.9	0.84	0.484974226	0.714509835	-0.466666667	0.84	0.484974226	1.38191288	2.968901416
TIPARP	R5020	2	no E2	pax2	R5020 - no E2	R5020 - no E2 - pax2	25.58	20.04	5.54	0.021492841					-1.786666667			3.450168128
TIPARP	R5020	3	no E2	pax2	R5020 - no E2	R5020 - no E2 - pax2	25.16	19.86	5.3	0.025382887					-2.026666667			4.07462324
TIPARP	T0	1	E2	pax2	T0 - E2	T0 - E2 - pax2	26.53	20.24	6.29	0.01277972	6.253333333	1.145440236	0.661320228	0.632299407	-1.036666667	1.145440236	0.661320228	2.051482243	2.576085972
TIPARP	T0	2	E2	pax2	T0 - E2	T0 - E2 - pax2	26.2	21.11	5.09	0.029360086					-2.236666667			4.713068555
TIPARP	T0	3	E2	pax2	T0 - E2	T0 - E2 - pax2	25.54	18.16	7.38	0.006003419					0.053333333			0.963707118
TIPARP	R5020	1	E2	pax2	R5020 - E2	R5020 - E2 - pax2	25.84	20.82	5.02	0.030819772	4.48	1.032036821	0.595846736	0.661656007	-2.306666667	1.032036821	0.595846736	4.947386694	8.647811361
TIPARP	R5020	2	E2	pax2	R5020 - E2	R5020 - E2 - pax2	25.32	20.19	5.13	0.028557233					-2.196666667			4.584189448
TIPARP	R5020	3	E2	pax2	R5020 - E2	R5020 - E2 - pax2	23.57	20.28	3.29	0.102237757					-4.036666667			16.41185794
PGR	T0	1	no E2	ctrl	T0 - no E2	T0 - no E2 - ctrl	29.78	21.3	8.48	0.002800694	8.686666667	0.200333056	0.115662344	0.922958482	-0.206666667	0.200333056	0.115662344	1.154018752	1.006467345
PGR	T0	2	no E2	ctrl	T0 - no E2	T0 - no E2 - ctrl	27.55	18.85	8.7	0.002404579					0.013333333			0.990800613
PGR	T0	3	no E2	ctrl	T0 - no E2	T0 - no E2 - ctrl	28.21	19.33	8.88	0.002122529					0.193333333			0.87458267
PGR	R5020	1	no E2	ctrl	R5020 - no E2	R5020 - no E2 - ctrl	28.98	20.55	8.43	0.00289946	8.73	0.98488578	0.56862407	0.674259538	-0.256666667	0.98488578	0.56862407	1.194715135	1.112336621
PGR	R5020	2	no E2	ctrl	R5020 - no E2	R5020 - no E2 - ctrl	27.81	19.88	7.93	0.004100456					-0.756666667			1.689582347
PGR	R5020	3	no E2	ctrl	R5020 - no E2	R5020 - no E2 - ctrl	28.84	19.01	9.83	0.00109869					1.143333333			0.452712381
PGR	T0	1	E2	ctrl	T0 - E2	T0 - E2 - ctrl	25.03	19.85	5.18	0.027584469	5.503333333	0.302709982	0.17476969	0.885908933	-3.506666667	0.302709982	0.17476969	11.36610991	9.219947598
PGR	T0	2	E2	ctrl	T0 - E2	T0 - E2 - ctrl	26.59	20.81	5.78	0.018198962					-2.906666667			7.498835972
PGR	T0	3	E2	ctrl	T0 - E2	T0 - E2 - ctrl	26	20.45	5.55	0.021344379					-3.136666667			8.794896907
PGR	R5020	1	E2	ctrl	R5020 - E2	R5020 - E2 - ctrl	26.71	21.18	5.53	0.021642335	5.9	0.360416426	0.20808652	0.865684648	-3.156666667	0.360416426	0.20808652	8.917669093	7.045633492
PGR	R5020	2	E2	ctrl	R5020 - E2	R5020 - E2 - ctrl	27.17	20.92	6.25	0.013139006					-2.436666667			5.413894097
PGR	R5020	3	E2	ctrl	R5020 - E2	R5020 - E2 - ctrl	25.81	19.89	5.92	0.016515907					-2.766666667			6.805337288
PGR	T0	1	no E2	pax2	T0 - no E2	T0 - no E2 - pax2	28.18	19.62	8.56	0.002649618	8.676666667	0.14571662	0.08412953	0.94335355	-0.126666667	0.14571662	0.08412953	1.091768265	1.010332911
PGR	T0	2	no E2	pax2	T0 - no E2	T0 - no E2 - pax2	28.82	20.19	8.63	0.002524127					-0.056666667			1.040059934
PGR	T0	3	no E2	pax2	T0 - no E2	T0 - no E2 - pax2	28.46	19.62	8.84	0.002182201					0.153333333			0.899170536
PGR	R5020	1	no E2	pax2	R5020 - no E2	R5020 - no E2 - pax2	28.46	19.68	8.78	0.00227487	8.81	0.079372539	0.045825757	0.968735182	0.093333333	0.079372539	0.045825757	0.937354497	0.918982279
PGR	R5020	2	no E2	pax2	R5020 - no E2	R5020 - no E2 - pax2	28.79	20.04	8.75	0.00232267					0.063333333			0.957050307
PGR	R5020	3	no E2	pax2	R5020 - no E2	R5020 - no E2 - pax2	28.76	19.86	8.9	0.002093308					0.213333333			0.862542032
PGR	T0	1	E2	pax2	T0 - E2	T0 - E2 - pax2	25.6	20.24	5.36	0.024348893	5.773333333	0.606822324	0.350349032	0.784394306	-3.326666667	0.606822324	0.350349032	10.03289928	7.949820173
PGR	T0	2	E2	pax2	T0 - E2	T0 - E2 - pax2	26.6	21.11	5.49	0.022250784					-3.196666667			9.168378896
PGR	T0	3	E2	pax2	T0 - E2	T0 - E2 - pax2	24.63	18.16	6.47	0.011280697					-2.216666667			4.648182348
PGR	R5020	1	E2	pax2	R5020 - E2	R5020 - E2 - pax2	26.96	20.82	6.14	0.014179987	6.11	0.365923489	0.211266025	0.863778897	-2.546666667	0.365923489	0.211266025	5.842827378	6.095540748
PGR	R5020	2	E2	pax2	R5020 - E2	R5020 - E2 - pax2	26.65	20.19	6.46	0.01135916					-2.226666667			4.680513013
PGR	R5020	3	E2	pax2	R5020 - E2	R5020 - E2 - pax2	26.01	20.28	5.73	0.018840747					-2.956666667			7.763281852
ESR1	T0	1	no E2	ctrl	T0 - no E2	T0 - no E2 - ctrl	29.14	21.3	7.84	0.004364403	8.11	0.23515952	0.135769412	0.910184288	-0.27	0.23515952	0.135769412	1.205807828	1.00914032
ESR1	T0	2	no E2	ctrl	T0 - no E2	T0 - no E2 - ctrl	27.12	18.85	8.27	0.003239529					0.16			0.895025071
ESR1	T0	3	no E2	ctrl	T0 - no E2	T0 - no E2 - ctrl	27.55	19.33	8.22	0.003353771					0.11			0.926588062
ESR1	R5020	1	no E2	ctrl	R5020 - no E2	R5020 - no E2 - ctrl	27.74	20.55	7.19	0.006848482	7.776666667	0.628516773	0.362874328	0.77761377	-0.92	0.628516773	0.362874328	1.892115293	1.338779197
ESR1	R5020	2	no E2	ctrl	R5020 - no E2	R5020 - no E2 - ctrl	27.58	19.88	7.7	0.004809158					-0.41			1.328685814
ESR1	R5020	3	no E2	ctrl	R5020 - no E2	R5020 - no E2 - ctrl	27.45	19.01	8.44	0.002879432					0.33			0.795536484
ESR1	T0	1	E2	ctrl	T0 - E2	T0 - E2 - ctrl	27.91	19.85	8.06	0.003747125	7.486666667	0.637599665	0.368118338	0.774792375	-0.05	0.637599665	0.368118338	1.035264924	1.646243506
ESR1	T0	2	E2	ctrl	T0 - E2	T0 - E2 - ctrl	27.61	20.81	6.8	0.008974206					-1.31			2.4794154
ESR1	T0	3	E2	ctrl	T0 - E2	T0 - E2 - ctrl	28.05	20.45	7.6	0.005154328					-0.51			1.424050196
ESR1	R5020	1	E2	ctrl	R5020 - E2	R5020 - E2 - ctrl	27.31	21.18	6.13	0.014278616	6.636666667	0.439810565	0.253924748	0.838611926	-1.98	0.439810565	0.253924748	3.944930818	2.868290827
ESR1	R5020	2	E2	ctrl	R5020 - E2	R5020 - E2 - ctrl	27.84	20.92	6.92	0.008257953					-1.19			2.281527432
ESR1	R5020	3	E2	ctrl	R5020 - E2	R5020 - E2 - ctrl	26.75	19.89	6.86	0.008608634					-1.25			2.37841423
ESR1	T0	1	no E2	pax2	T0 - no E2	T0 - no E2 - pax2	26.99	19.62	7.37	0.006045176	7.533333333	0.265769324	0.15344199	0.899102817	-0.74	0.265769324	0.15344199	1.670175839	1.5077219
ESR1	T0	2	no E2	pax2	T0 - no E2	T0 - no E2 - pax2	28.03	20.19	7.84	0.004364403					-0.27			1.205807828
ESR1	T0	3	no E2	pax2	T0 - no E2	T0 - no E2 - pax2	27.01	19.62	7.39	0.00596195					-0.72			1.647182035
ESR1	R5020	1	no E2	pax2	R5020 - no E2	R5020 - no E2 - pax2	28.16	19.68	8.48	0.002800694	8.033333333	0.528425334	0.305086509	0.809393681	0.37	0.528425334	0.305086509	0.773782497	1.104376413
ESR1	R5020	2	no E2	pax2	R5020 - no E2	R5020 - no E2 - pax2	27.49	20.04	7.45	0.005719085					-0.66			1.580082624
ESR1	R5020	3	no E2	pax2	R5020 - no E2	R5020 - no E2 - pax2	28.03	19.86	8.17	0.003472042					0.06			0.959264119
ESR1	T0	1	E2	pax2	T0 - E2	T0 - E2 - pax2	27.56	20.24	7.32	0.006258358	7.886666667	1.259536952	0.727193998	0.604077686	-0.79	1.259536952	0.727193998	1.729074463	1.433968035
ESR1	T0	2	E2	pax2	T0 - E2	T0 - E2 - pax2	28.12	21.11	7.01	0.007758535					-1.1			2.143546925
ESR1	T0	3	E2	pax2	T0 - E2	T0 - E2 - pax2	27.49	18.16	9.33	0.001553782					1.22			0.429282718
ESR1	R5020	1	E2	pax2	R5020 - E2	R5020 - E2 - pax2	28.5	20.82	7.68	0.004876291	7.51	0.199749844	0.115325626	0.923173921	-0.43	0.199749844	0.115325626	1.347233577	1.525575088
ESR1	R5020	2	E2	pax2	R5020 - E2	R5020 - E2 - pax2	27.48	20.19	7.29	0.00638986					-0.82			1.765405993
ESR1	R5020	3	E2	pax2	R5020 - E2	R5020 - E2 - pax2	27.84	20.28	7.56	0.005299236					-0.55			1.464085696
TGFA	T0	1	no E2	ctrl	T0 - no E2	T0 - no E2 - ctrl	27.47	21.3	6.17	0.013888167	6.91	0.707601583	0.408533964	0.753388562	-0.74	0.707601583	0.408533964	1.670175839	1.083773508
TGFA	T0	2	no E2	ctrl	T0 - no E2	T0 - no E2 - ctrl	26.43	18.85	7.58	0.00522628					0.67			0.628506687
TGFA	T0	3	no E2	ctrl	T0 - no E2	T0 - no E2 - ctrl	26.31	19.33	6.98	0.007921558					0.07			0.952637998
TGFA	R5020	1	no E2	ctrl	R5020 - no E2	R5020 - no E2 - ctrl	26.62	20.55	6.07	0.014884969	6.713333333	0.581062246	0.335476444	0.792522366	-0.84	0.581062246	0.335476444	1.790050142	1.212022009
TGFA	R5020	2	no E2	ctrl	R5020 - no E2	R5020 - no E2 - ctrl	26.75	19.88	6.87	0.00854917					-0.04			1.028113827
TGFA	R5020	3	no E2	ctrl	R5020 - no E2	R5020 - no E2 - ctrl	26.21	19.01	7.2	0.006801176					0.29			0.817902059
TGFA	T0	1	E2	ctrl	T0 - E2	T0 - E2 - ctrl	25.12	19.85	5.27	0.025916236	4.58	0.597578447	0.345012077	0.787301386	-1.64	0.597578447	0.345012077	3.116658319	5.29650307
TGFA	T0	2	E2	ctrl	T0 - E2	T0 - E2 - ctrl	25.05	20.81	4.24	0.052921582					-2.67			6.36429187
TGFA	T0	3	E2	ctrl	T0 - E2	T0 - E2 - ctrl	24.68	20.45	4.23	0.053289681					-2.68			6.408559021
TGFA	R5020	1	E2	ctrl	R5020 - E2	R5020 - E2 - ctrl	26.52	21.18	5.34	0.024688791	5.01	0.320468407	0.185022521	0.879635344	-1.57	0.320468407	0.185022521	2.969047141	3.793343488
TGFA	R5020	2	E2	ctrl	R5020 - E2	R5020 - E2 - ctrl	25.91	20.92	4.99	0.031467361					-1.92			3.784230587
TGFA	R5020	3	E2	ctrl	R5020 - E2	R5020 - E2 - ctrl	24.59	19.89	4.7	0.038473263					-2.21			4.626752736
TGFA	T0	1	no E2	pax2	T0 - no E2	T0 - no E2 - pax2	27.21	19.62	7.59	0.005190179	6.613333333	0.870306459	0.502471669	0.705896382	0.68	0.870306459	0.502471669	0.624165274	1.368399838
TGFA	T0	2	no E2	pax2	T0 - no E2	T0 - no E2 - pax2	26.52	20.19	6.33	0.012430258					-0.58			1.494849249
TGFA	T0	3	no E2	pax2	T0 - no E2	T0 - no E2 - pax2	25.54	19.62	5.92	0.016515907					-0.99			1.986184991
TGFA	R5020	1	no E2	pax2	R5020 - no E2	R5020 - no E2 - pax2	26.51	19.68	6.83	0.008789519	6.606666667	0.344431899	0.19885785	0.871240032	-0.08	0.344431899	0.19885785	1.057018041	1.258605512
TGFA	R5020	2	no E2	pax2	R5020 - no E2	R5020 - no E2 - pax2	26.25	20.04	6.21	0.013508394					-0.7			1.624504793
TGFA	R5020	3	no E2	pax2	R5020 - no E2	R5020 - no E2 - pax2	26.64	19.86	6.78	0.009099481					-0.13			1.094293701
TGFA	T0	1	E2	pax2	T0 - E2	T0 - E2 - pax2	23.98	20.24	3.74	0.074842419	4.49	1.602529251	0.925220694	0.526599956	-3.17	1.602529251	0.925220694	9.000467878	7.29590623
TGFA	T0	2	E2	pax2	T0 - E2	T0 - E2 - pax2	24.51	21.11	3.4	0.094732285					-3.51			11.39240156
TGFA	T0	3	E2	pax2	T0 - E2	T0 - E2 - pax2	24.49	18.16	6.33	0.012430258					-0.58			1.494849249
TGFA	R5020	1	E2	pax2	R5020 - E2	R5020 - E2 - pax2	26.13	20.82	5.31	0.025207555	4.923333333	0.463177432	0.267415615	0.830806486	-1.6	0.463177432	0.267415615	3.031433133	4.106121335
TGFA	R5020	2	E2	pax2	R5020 - E2	R5020 - E2 - pax2	25.24	20.19	5.05	0.03018551					-1.86			3.630076621
TGFA	R5020	3	E2	pax2	R5020 - E2	R5020 - E2 - pax2	24.69	20.28	4.41	0.047038961					-2.5			5.656854249
