# Supplementary material for: Chromatin topology defines estradiol-primed progesterone receptor and PAX2 binding in endometrial cancer cells
Source: eLife journal article supplement (doi:10.7554/elife.66034), 2022-01-12
Supplement: supp [file elife-66034-supp-v1.zip › elife_poa_e66034_Figure_6_source_data_1.txt]

chr14	101700000	103550000
chr5	94900000	96600000
chr2	109800000	110600000
chr19	36150000	37900000
chr6	97450000	99850000
chr17	18200000	19050000
chr6	158150000	158700000
chrX	153750000	154550000
chr8	143300000	144400000
chr17	59200000	60050000
chr9	34650000	37450000
chr3	51450000	53900000
chr1	83850000	85300000
chrX	102400000	102500000
chr15	44550000	45100000
chr18	59900000	60650000
chr1	78100000	78700000
chr3	111650000	112050000
chr1	62800000	63600000
chrX	76250000	78100000
chr12	6300000	6900000
chr2	69850000	70300000
chr1	160650000	161150000
chr9	69050000	69950000
chr11	62150000	62250000
chr4	175550000	176350000
chr2	231750000	232550000
chr1	226100000	226400000
chr19	45450000	45750000
chr17	3700000	4100000
chr13	35900000	37050000
chr3	167350000	168100000
chr1	186350000	187000000
chr2	134950000	135850000
chr18	48650000	49500000
chr2	73650000	74550000
chr5	10250000	10650000
chr6	52100000	53100000
chr12	27400000	27700000
chr6	109100000	109450000
chrX	13500000	13900000
chr5	110700000	112150000
chr8	61100000	63200000
chr6	161400000	164100000
chr2	205950000	207550000
chrX	119500000	120750000
chr12	55700000	56500000
chr1	71100000	74750000
chr9	104750000	105750000
chr3	122350000	123600000
chr8	41550000	42250000
chr4	70550000	73050000
chr14	104750000	105550000
chr14	74300000	75000000
chr18	50450000	54150000
chr12	99000000	100750000
chr6	87050000	88900000
chrX	55100000	56250000
chr6	45900000	47050000
chr13	49900000	51100000
chr8	66600000	68550000
chr2	189450000	191050000
chr3	196000000	196550000
chr11	71550000	72450000
chr2	98600000	99500000
chr5	70900000	72350000
chr10	110650000	112400000
chr19	5750000	7100000
chr3	183850000	184350000
chr22	28700000	29300000
chr10	102650000	104350000
chr2	108200000	109800000
chr5	138500000	139400000
chr5	88700000	90800000
chrX	53200000	55100000
chr5	134000000	135400000
chrX	20500000	23650000
chr5	99100000	103550000
chr6	27150000	27850000
chr6	26100000	26600000
chr17	38700000	39300000
chr1	198550000	198700000
chrX	148000000	149500000
chr20	31050000	31750000
chr2	182700000	183250000
chr8	103050000	103550000
chr2	30150000	30700000
chr4	18650000	20700000
chr12	84850000	84950000
chr12	84950000	85050000
chr15	81300000	81350000
chr15	88500000	88550000
chr2	67950000	68100000
chr8	65600000	65650000
chrX	13900000	14050000
chr1	162700000	162850000
chr15	56300000	56450000
chr4	83400000	83550000
chr5	131150000	131400000
chr7	131650000	132600000
chr9	61800000	62000000
chr9	67600000	68150000
chrX	89750000	91850000
chr12	57350000	57500000
chr9	86100000	86350000
chr12	53400000	53500000
chrY	12100000	13500000
chr12	107900000	108550000
chr7	144250000	144400000
chrX	102500000	102950000
chr14	19650000	20300000
chr12	57500000	57750000
chr8	40100000	40200000
chr3	185950000	186600000
chr5	135850000	136250000
chr14	57400000	58450000
chr2	182150000	182700000
chr6	132350000	132500000
chr7	82750000	83350000
chr20	50900000	50950000
chr3	86650000	87200000
chr4	73050000	73250000
chr7	108150000	108550000
chr2	208200000	208350000
chr3	4300000	4650000
chr4	84550000	85050000
chr4	103100000	103950000
chr9	100600000	101400000
chrX	100550000	100700000
chr2	177150000	177250000
chr4	20700000	21750000
chr4	121250000	121800000
chr9	76350000	76750000
chr2	69350000	69850000
chr2	87250000	87950000
chr2	198300000	199900000
chr4	99500000	99950000
chr19	50000000	50300000
chr7	155800000	156900000
chr9	32350000	33050000
chrX	149500000	149750000
chrX	48050000	48550000
chr19	13850000	14100000
chr6	83550000	87050000
chr14	92800000	93150000
chr14	39050000	39450000
chr11	61750000	62150000
chr7	116900000	118200000
chr14	55400000	56500000
chr17	6550000	7200000
chr1	56800000	58700000
chr18	49500000	50450000
chrX	51450000	53200000
chr9	101500000	104750000
chr2	84400000	84900000
chr3	49500000	49600000
chr8	47900000	48050000
chr20	54100000	54650000
chr7	67150000	67350000
chr14	64850000	65000000
chr17	29150000	29550000
chr3	16250000	16550000
chr4	25400000	25950000
chr1	66750000	67500000
chr8	42250000	42400000
chr1	100900000	101400000
chr11	118650000	119000000
chr4	13650000	15450000
chr6	145750000	146800000
chrX	70700000	71650000
chr2	46450000	46900000
chr4	56400000	57000000
chr5	177550000	178200000
chr1	42150000	42800000
chr5	7850000	10250000
chr3	44300000	45000000
chr7	37900000	38350000
chr12	19600000	21200000
chr5	128200000	128900000
chr11	20650000	22250000
chr4	124300000	125300000
chr5	73550000	73700000
chrX	68150000	68600000
chrX	109450000	109900000
chr14	96350000	96550000
chr3	27700000	28350000
chr9	70600000	71900000
chr9	89300000	89550000
chr15	40900000	41400000
chrX	80350000	83900000
chr2	230900000	231500000
chr10	90850000	91300000
chr11	125900000	126300000
chr16	30700000	30850000
chr7	98250000	98950000
chr10	72350000	73200000
chr2	106600000	108200000
chrX	133750000	134450000
chr18	63500000	64000000
chrX	154850000	155300000
chr16	66350000	66900000
chr17	28650000	28950000
chr3	49000000	49500000
chr6	167150000	168050000
chr7	116100000	116900000
chr1	149350000	150100000
chr5	17200000	18350000
chr6	13300000	14000000
chr14	93150000	94050000
chr4	69650000	70550000
chr7	11350000	12500000
chr2	164950000	166300000
chr2	152700000	153500000
chr1	185700000	186350000
chr3	112550000	113000000
chr12	85050000	85950000
chr14	50850000	51250000
chr6	47800000	49500000
chr8	79650000	80050000
chr17	17250000	17650000
chr16	20750000	21150000
chr20	23650000	24950000
chr1	39050000	39800000
chr3	157550000	158800000
chr1	169850000	170950000
chr5	83650000	87400000
chr1	75200000	77150000
chr16	70150000	70750000
chr7	130850000	131550000
chrX	18350000	19350000
chr3	46550000	47450000
chr21	27700000	28950000
chr2	200850000	201200000
chr12	64750000	65250000
chr7	47900000	48200000
chr8	48050000	48950000
chr1	246500000	247350000
chr2	60650000	61050000
chr4	176350000	180700000
chr1	156600000	157000000
chr1	45600000	46100000
chr2	113050000	113500000
chr2	1850000	3700000
chr11	112100000	113300000
chr15	28150000	29650000
chr6	73700000	75200000
chr8	84600000	86100000
chr1	224450000	225400000
chr5	132950000	133100000
chr21	33550000	33900000
chr16	67350000	67500000
chr2	157250000	158000000
chr7	74400000	74750000
chr17	77500000	78100000
chr4	147900000	149350000
chr6	107950000	108550000
chr18	45650000	46100000
chr3	25600000	27200000
chr12	51400000	52000000
chr7	73300000	74400000
chr1	165350000	165950000
chr12	29050000	30850000
chr22	24550000	25150000
chr4	82350000	83350000
chr12	56550000	57250000
chr19	47850000	48600000
chr4	86450000	86900000
chr1	157100000	158150000
chr2	56150000	57650000
chr8	125050000	125700000
chr9	27300000	27600000
chr8	95300000	96250000
chr3	149400000	149850000
chrX	11150000	12800000
chr1	24650000	25250000
chr12	12350000	12750000
chr1	227500000	228000000
chr2	71500000	73250000
chr11	119000000	119350000
chr7	102500000	104900000
chr10	102150000	102650000
chr18	46100000	47750000
chr12	10200000	11550000
chr1	228000000	228550000
chr12	31650000	32350000
chr15	45100000	45650000
chr11	121250000	121600000
chr15	60550000	61850000
chr6	18550000	20100000
chr3	98000000	99800000
chr12	110900000	111350000
chr8	81250000	81700000
chr1	47150000	47750000
chr11	133050000	134350000
chr1	34800000	35850000
chr9	136750000	137150000
chr16	21350000	22600000
chr11	1600000	2050000
chr11	62350000	62850000
chr14	87900000	89000000
chr4	121800000	122950000
chr1	87100000	88900000
chr4	125300000	127650000
chr10	50950000	52250000
chr12	85950000	88050000
chr5	112150000	112500000
chr8	100150000	100550000
chr2	169400000	170900000
chr13	37650000	38950000
chr5	62200000	64100000
chr1	40050000	40450000
chr2	50500000	53800000
chr6	142300000	143500000
chr1	170950000	171550000
chr6	159700000	160600000
chr15	74350000	74850000
chr1	202150000	203000000
chr8	17950000	18900000
chrX	10050000	10150000
chr11	120250000	121250000
chr1	236550000	237800000
chr10	114200000	114850000
chr18	74600000	76350000
chr3	138050000	139000000
chr15	51500000	52200000
chr4	3000000	3500000
chr5	42900000	43650000
chr6	43550000	44450000
chr8	81700000	84600000
chr12	71950000	74650000
chr15	52750000	55200000
chrX	121600000	124350000
chr11	95800000	96450000
chr5	144150000	146100000
chr12	106300000	107000000
chr14	29550000	31250000
chr2	229750000	230800000
chr14	69800000	71050000
chr1	205300000	206150000
chr9	121450000	122050000
chr2	94500000	95350000
chr15	90200000	91000000
chrX	3850000	7950000
chr1	171550000	172750000
chr19	4600000	5750000
chr6	144050000	145750000
chr8	69650000	70700000
chr7	25850000	26700000
chr8	54550000	57400000
chr2	63950000	64900000
chr1	173400000	174250000
chr5	179600000	180800000
chr9	132300000	133000000
chr1	150200000	151050000
chr12	110000000	110900000
chr6	124850000	125850000
chr2	203950000	205800000
chr6	146800000	148550000
chr4	86900000	88200000
chr7	128350000	129150000
chr1	197400000	198550000
chr12	105400000	106300000
chr9	6800000	10000000
chr4	39450000	40900000
chr11	57300000	59150000
chr1	212450000	213100000
chr6	111250000	112150000
chr19	46600000	47250000
chr5	39550000	40750000
chr3	123600000	124600000
chr5	172950000	173600000
chr7	6900000	8350000
chr20	18350000	19700000
chr17	26600000	28650000
chr2	237500000	238300000
chr8	52950000	54150000
chr14	54400000	55400000
chr2	11150000	11700000
chr12	125100000	132100000
chr7	8350000	11350000
chr10	84200000	86400000
chr7	124950000	128350000
chr6	44450000	45900000
chr10	52800000	58250000
chr1	215650000	218250000
chr17	19900000	22750000
chr5	123650000	126450000
chr1	58700000	59850000
chr10	69050000	70400000
chr4	99950000	103100000
chr15	48350000	50950000
chr9	105800000	107400000
chr1	60850000	62150000
chr1	214200000	214650000
chr15	62350000	64150000
chr9	134100000	136400000
chr5	163450000	168250000
chr8	133500000	134900000
chr3	179600000	182700000
chr4	27050000	36350000
chr16	83900000	85050000
chr5	103550000	110700000
chr14	20300000	20650000
chr16	34550000	35400000
chr6	75200000	75600000
chr6	26600000	27150000
chr1	161450000	161650000
chr1	161300000	161450000
chr9	72000000	72250000
chr14	20650000	21600000
chr14	24450000	25450000
chr2	89250000	90450000
chr3	79500000	80700000
chr5	49250000	50900000
chr8	54150000	54550000
chr5	122100000	122450000
chr1	120200000	121100000
chr1	143300000	144100000
chr16	50800000	52000000
chr3	72900000	73100000
chr12	12050000	12350000
chr2	211700000	212600000
chr16	49400000	49950000
chr9	21150000	21800000
chr12	13250000	14200000
chr3	115850000	116800000
chr4	21750000	22850000
chrX	65550000	66750000
chr21	9500000	10850000
chr4	62750000	64600000
chr12	13100000	13250000
chr1	16450000	16950000
chr12	57250000	57350000
chr2	230800000	230900000
chr3	30000000	30750000
chr8	102700000	102850000
chr6	130850000	131600000
chr2	66450000	67950000
chr16	87350000	87700000
chr5	58500000	58850000
chr2	237100000	237500000
chr13	19600000	20050000
chr4	158200000	158650000
chr7	93200000	94400000
chr9	62900000	63650000
chr3	88150000	90500000
chr4	90350000	93800000
chr2	79000000	79950000
chr13	65650000	67250000
chr1	210200000	210350000
chr1	156050000	156150000
chr18	63000000	63500000
chr6	83100000	83550000
chr3	184350000	184450000
chr1	235100000	235500000
chr8	21950000	22150000
chrX	74550000	76250000
chr1	2150000	2400000
chr1	2600000	2700000
chr1	2700000	2800000
chr1	7850000	7950000
chr1	12800000	13350000
chr1	15200000	15350000
chr1	20550000	20600000
chr1	74750000	75200000
chr1	103550000	103750000
chr1	144600000	144800000
chr1	148650000	149000000
chr1	149000000	149350000
chr1	169650000	169850000
chr1	176900000	177950000
chr1	181450000	182050000
chr1	222500000	222550000
chr1	228600000	228650000
chr10	52700000	52800000
chr10	79350000	79450000
chr10	89750000	90850000
chr10	95650000	95750000
chr10	101650000	101800000
chr10	114850000	115150000
chr10	117200000	117350000
chr11	2100000	2150000
chr11	3300000	3400000
chr11	12950000	13050000
chr11	22250000	22850000
chr11	29350000	30300000
chr11	54300000	56850000
chr11	64200000	64250000
chr11	89700000	90150000
chr11	103050000	103650000
chr11	109900000	110400000
chr11	130900000	131700000
chr12	3850000	4300000
chr12	19450000	19600000
chr12	48700000	48750000
chr12	68000000	68100000
chr12	100750000	101400000
chr12	105300000	105400000
chr12	120150000	120200000
chr12	123700000	124000000
chr12	124950000	125050000
chr13	18050000	18250000
chr13	77650000	77750000
chr13	77750000	78100000
chr13	100600000	101150000
chr13	112500000	112550000
chr13	112550000	112900000
chr14	18850000	19600000
chr14	35450000	35850000
chr14	76750000	76800000
chr15	20400000	20650000
chr15	20650000	21450000
chr15	29650000	30100000
chr15	30100000	30150000
chr15	32550000	32600000
chr15	42550000	42650000
chr15	59600000	59650000
chr15	77600000	77900000
chr15	84150000	84550000
chr16	2550000	2600000
chr16	10250000	10500000
chr16	18300000	18650000
chr16	21150000	21200000
chr16	28700000	28900000
chr16	28900000	29000000
chr16	32050000	32650000
chr16	32650000	32700000
chr16	32750000	33450000
chr16	48650000	49400000
chr16	74300000	74400000
chr16	74550000	74650000
chr16	75750000	77200000
chr16	77200000	77650000
chr17	5500000	6450000
chr17	35900000	36350000
chr17	78900000	79000000
chr17	81650000	81850000
chr19	7100000	7350000
chr19	12700000	12750000
chr2	6850000	6950000
chr2	11750000	11800000
chr2	16750000	17700000
chr2	27550000	27700000
chr2	29200000	30150000
chr2	41800000	42050000
chr2	73250000	73650000
chr2	86900000	87250000
chr2	88750000	88800000
chr2	91250000	92150000
chr2	97200000	97450000
chr2	97450000	97550000
chr2	100500000	101000000
chr2	111800000	111850000
chr2	117800000	117900000
chr2	117900000	118000000
chr2	166300000	166450000
chr2	172600000	172750000
chr2	210250000	210450000
chr2	216600000	216650000
chr2	231700000	231750000
chr2	239000000	240050000
chr20	4100000	4650000
chr20	5200000	5450000
chr20	6150000	7900000
chr20	9500000	9600000
chr20	16800000	17500000
chr20	28500000	29000000
chr20	29050000	31050000
chr20	32700000	32750000
chr20	35350000	35450000
chr20	37050000	37200000
chr20	37200000	37450000
chr20	49200000	49250000
chr21	6400000	6500000
chr21	6500000	6650000
chr21	6650000	6900000
chr21	6900000	7200000
chr21	7200000	7850000
chr21	8100000	8650000
chr21	8750000	9400000
chr21	12850000	13800000
chr21	13800000	14200000
chr21	31100000	31650000
chr21	42900000	42950000
chr21	44050000	44300000
chr22	11700000	12250000
chr22	17000000	17050000
chr22	18200000	18900000
chr22	20000000	20100000
chr22	21500000	21600000
chr22	41450000	41650000
chr3	19000000	19900000
chr3	62250000	62550000
chr3	87200000	88150000
chr3	112050000	112550000
chr3	132550000	132700000
chr4	3500000	3950000
chr4	8950000	9650000
chr4	11750000	12700000
chr4	83550000	83650000
chr4	122950000	123000000
chr4	143550000	143650000
chr4	143650000	144100000
chr4	147100000	147650000
chr4	147650000	147750000
chr4	154700000	155400000
chr4	173300000	173350000
chr5	15050000	16450000
chr5	32500000	32600000
chr5	38250000	38300000
chr5	44850000	47350000
chr5	69650000	70100000
chr5	70100000	70450000
chr5	70450000	70500000
chr5	70500000	70750000
chr5	98850000	98950000
chr5	115150000	115250000
chr5	118850000	118950000
chr5	160050000	160250000
chr5	176500000	176600000
chr6	41050000	41350000
chr6	49900000	49950000
chr6	75600000	75850000
chr6	79900000	80000000
chr6	80000000	80100000
chr6	119000000	119100000
chr6	123400000	123750000
chr6	149900000	149950000
chr6	149950000	150000000
chr6	165850000	166150000
chr7	1200000	1500000
chr7	6750000	6900000
chr7	32200000	32500000
chr7	74750000	74800000
chr7	74800000	75100000
chr7	75100000	75300000
chr7	75300000	75400000
chr7	113750000	113950000
chr7	129900000	130050000
chr7	137600000	137900000
chr7	144150000	144250000
chr8	7450000	8000000
chr8	8000000	8100000
chr8	12150000	12550000
chr8	16800000	17200000
chr8	47850000	47900000
chr8	65650000	65700000
chr8	71800000	71900000
chr8	134900000	138700000
chr9	42500000	42600000
chr9	42700000	43400000
chr9	60650000	61500000
chr9	62100000	62500000
chr9	62800000	62900000
chr9	63650000	63950000
chr9	63950000	64050000
chr9	64150000	64450000
chr9	65200000	65300000
chr9	65750000	65850000
chr9	66150000	66450000
chr9	66550000	67200000
chr9	94000000	94100000
chrX	7950000	8800000
chrX	25200000	26650000
chrX	30550000	30650000
chrX	33400000	34350000
chrX	43650000	43800000
chrX	49750000	49850000
chrX	50650000	51450000
chrX	68600000	68750000
chrX	69400000	70150000
chrX	74450000	74550000
chrX	85600000	89750000
chrX	100700000	100800000
chrX	119350000	119500000
chrX	130950000	131750000
chrX	135700000	135800000
chrX	135800000	135900000
chrX	138100000	138750000
chrX	151100000	151700000
chrX	153600000	153750000
chrX	154750000	154850000
chrY	3200000	3900000
chrY	5000000	5500000
chrY	5950000	10100000
chrY	13500000	13800000
chrY	13800000	16950000
chrY	17350000	19700000
chrY	19700000	19850000
chrY	20450000	20950000
chrY	21050000	56500000
chr5	126450000	126600000
chr6	53850000	53950000
chr7	1050000	1200000
chr1	41000000	41250000
chr5	157750000	158050000
chr13	28800000	29450000
chr13	45000000	45350000
chr18	70150000	70500000
chr17	2350000	2800000
chr4	155400000	155850000
chr1	162850000	163350000
chr11	118150000	118650000
chr14	72950000	73500000
chr4	183400000	184250000
chrX	120750000	121600000
chr13	94400000	95500000
chr1	104750000	105850000
chr9	15700000	17500000
chr4	166150000	168150000
chr13	79500000	79550000
chr1	244800000	244950000
chr12	49050000	49250000
chr15	73250000	73950000
chrX	152900000	153600000
chr1	2400000	2600000
chr1	2800000	3450000
chr1	3450000	3800000
chr1	15350000	15750000
chr1	35850000	35950000
chr1	35950000	36100000
chr1	37900000	38000000
chr1	62450000	62800000
chr1	103750000	104750000
chr1	111450000	112350000
chr1	144100000	144600000
chr1	146050000	146100000
chr1	222550000	222650000
chr1	234200000	234350000
chr1	244950000	245100000
chr10	26650000	26800000
chr10	28500000	28600000
chr10	47450000	47500000
chr10	70400000	70900000
chr10	95750000	95900000
chr10	110200000	110300000
chr11	3800000	4150000
chr11	4150000	5050000
chr11	14350000	14500000
chr11	41450000	43300000
chr11	44600000	44900000
chr11	68950000	69050000
chr11	69700000	69900000
chr11	108700000	109900000
chr12	4300000	6050000
chr12	56500000	56550000
chr12	63100000	63800000
chr12	76600000	77000000
chr12	109900000	110000000
chr13	26950000	27350000
chr13	31100000	31850000
chr13	37050000	37650000
chr13	95900000	97000000
chr13	111150000	111350000
chr14	56500000	57400000
chr14	100250000	100300000
chr14	100300000	100350000
chr15	19750000	20300000
chr15	22300000	23050000
chr15	59000000	59050000
chr15	66400000	66550000
chr15	73950000	74350000
chr16	9150000	10250000
chr16	30850000	30950000
chr17	6450000	6550000
chr17	12050000	12150000
chr17	12150000	13100000
chr17	32950000	34250000
chr17	36350000	36500000
chr17	37900000	38300000
chr17	43250000	43350000
chr17	45200000	45300000
chr17	51050000	51250000
chr17	61450000	61600000
chr17	68500000	68750000
chr18	7200000	8600000
chr18	59100000	59850000
chr18	61400000	61550000
chr19	30650000	32300000
chr19	32300000	32600000
chr19	38250000	38300000
chr2	3700000	6850000
chr2	37900000	38050000
chr2	63600000	63950000
chr2	68100000	68450000
chr2	68450000	68950000
chr2	68950000	69350000
chr2	88000000	88750000
chr2	105050000	105250000
chr2	120700000	121100000
chr2	153500000	154400000
chr2	186850000	187500000
chr2	202400000	202550000
chr2	208150000	208200000
chr2	231500000	231700000
chr20	37450000	37550000
chr20	41700000	43450000
chr21	17650000	18300000
chr22	19800000	19950000
chr22	21100000	21500000
chr3	11850000	12550000
chr3	16550000	17850000
chr3	48650000	49000000
chr3	75200000	75650000
chr3	80700000	81350000
chr3	155750000	156000000
chr3	185850000	185950000
chr4	8650000	8950000
chr4	42950000	44700000
chr4	75550000	75900000
chr4	114400000	114750000
chr4	147750000	147900000
chr5	138150000	138300000
chr6	5400000	6600000
chr6	14000000	14150000
chr6	42750000	42900000
chr6	49950000	50050000
chr6	50050000	50800000
chr6	59950000	63300000
chr6	73550000	73700000
chr6	75850000	77550000
chr6	112150000	112250000
chr6	125850000	126000000
chr6	141650000	142300000
chr7	35650000	35950000
chr7	50000000	50400000
chr7	67050000	67150000
chr7	118200000	119200000
chr7	138850000	138950000
chr7	154850000	155800000
chr8	19350000	20200000
chr8	58550000	58700000
chr8	71900000	72200000
chr8	104500000	104750000
chr8	141250000	141400000
chr9	17500000	18200000
chr9	27600000	29800000
chr9	39650000	39900000
chr9	65300000	65750000
chr9	94100000	94250000
chr9	122400000	122850000
chrX	26650000	30550000
chrX	68750000	69400000
chrX	70150000	70700000
chrX	71650000	71850000
chrX	83900000	84800000
chrX	84800000	85050000
chrX	91850000	93550000
chrX	101350000	102400000
chrX	102950000	103500000
chrX	108100000	108600000
chrX	140000000	140750000
chrX	145200000	146250000
chr17	58350000	58500000
chr12	98400000	99000000
chr21	33900000	34350000
chr2	43600000	43900000
chr15	89300000	89600000
chr18	79350000	79650000
chrX	106850000	108100000
chr4	77300000	77650000
chr1	198700000	199600000
chr4	1700000	2200000
chr1	144850000	145350000
chr3	105550000	107150000
chr9	128150000	129050000
chr9	96750000	97650000
chr13	47800000	48800000
chrX	14050000	15300000
chr2	11800000	13050000
chr12	7150000	8500000
chr13	70600000	72750000
chr9	29800000	32350000
chr2	57650000	60650000
chr15	99100000	99150000
chr6	159150000	159700000
chr10	24600000	25100000
chr8	120100000	120950000
chr4	74700000	75550000
chr4	173450000	174350000
chr7	135050000	135250000
chr2	27350000	27550000
chr1	10250000	10450000
chr1	18600000	18850000
chr1	20600000	20650000
chr1	29250000	30750000
chr1	38850000	39050000
chr1	53400000	53800000
chr1	62150000	62450000
chr1	89900000	90050000
chr1	90050000	91200000
chr1	156150000	156300000
chr1	157000000	157100000
chr1	161150000	161300000
chr1	209650000	209800000
chr10	12050000	12200000
chr10	46300000	46550000
chr10	114150000	114200000
chr11	1400000	1600000
chr11	3400000	3800000
chr11	26300000	26700000
chr11	36350000	36600000
chr11	62250000	62350000
chr11	81500000	82700000
chr11	111850000	111950000
chr11	121600000	122550000
chr11	122950000	123050000
chr11	130200000	130300000
chr12	6900000	7050000
chr12	14200000	14700000
chr12	42100000	42400000
chr12	53600000	53700000
chr12	71850000	71950000
chr12	105200000	105300000
chr12	111450000	111750000
chr13	53050000	53200000
chr14	44850000	45300000
chr14	100350000	100650000
chr15	21450000	22300000
chr15	66550000	66750000
chr15	76050000	76150000
chr15	81050000	81300000
chr16	25250000	27150000
chr16	33450000	34300000
chr16	35400000	36950000
chr16	55450000	55900000
chr17	58200000	58350000
chr17	74750000	74800000
chr17	78100000	78150000
chr18	4050000	7200000
chr18	29850000	30950000
chr19	12950000	13850000
chr19	19000000	19400000
chr19	19400000	19550000
chr19	32600000	33150000
chr2	10450000	10550000
chr2	10550000	10700000
chr2	45850000	45950000
chr2	88800000	89250000
chr2	118000000	118950000
chr2	235750000	236250000
chr20	7900000	8750000
chr20	9600000	10450000
chr20	13800000	14100000
chr20	25400000	26650000
chr20	35950000	36050000
chr22	15050000	17000000
chr22	46200000	46350000
chr3	124600000	124700000
chr3	132300000	132550000
chr3	136050000	137050000
chr3	194400000	194500000
chr3	194500000	194600000
chr4	10050000	10550000
chr4	16250000	17500000
chr4	57000000	57400000
chr4	89150000	89950000
chr4	161250000	162450000
chr4	164750000	165100000
chr5	34000000	34100000
chr5	40750000	40800000
chr5	43650000	44850000
chr5	132850000	132950000
chr5	152500000	153950000
chr5	160250000	160450000
chr6	5100000	5400000
chr6	123750000	124850000
chr6	127250000	127550000
chr6	149550000	149900000
chr7	6450000	6750000
chr7	64950000	65500000
chr7	70800000	71750000
chr7	83350000	83900000
chr7	152850000	154850000
chr8	17800000	17950000
chr8	41100000	41550000
chr8	108800000	109350000
chr8	140450000	140550000
chr9	10000000	12550000
chr9	14450000	15150000
chr9	75150000	76350000
chr9	83600000	84350000
chr9	91750000	92100000
chrX	32400000	33400000
chrX	37000000	37300000
chrX	56250000	56900000
chrX	56900000	58700000
chrX	108600000	109450000
chrX	132650000	133750000
chrX	146250000	148000000
chr14	69650000	69800000
chr10	11800000	12050000
chr20	10450000	11550000
chr22	27850000	28700000
chr7	83900000	85050000
chr17	39300000	40000000
chr21	43700000	44050000
chr2	240100000	240500000
chr12	74650000	75500000
chr6	150400000	150850000
chr22	38700000	39150000
chr1	201400000	201850000
chr3	178400000	179000000
chr1	63600000	64250000
chr10	49550000	50250000
chr3	130100000	132250000
chr5	18350000	21800000
chr12	38300000	39300000
chr8	104750000	105850000
chr2	110600000	111750000
chr8	48950000	51650000
chr13	62000000	65650000
chr10	70900000	71300000
chr6	135450000	136350000
chr2	187500000	188500000
chr4	162450000	163550000
chr22	40900000	41450000
chr18	72700000	74150000
chr22	26700000	27850000
chr7	97050000	98250000
chr5	177100000	177550000
chr11	64750000	65350000
chr16	29000000	30050000
chr1	3800000	6000000
chr1	7700000	7850000
chr1	22650000	22950000
chr1	50350000	51250000
chr1	101400000	103550000
chr1	152050000	152500000
chr1	153300000	153400000
chr1	180200000	180500000
chr10	9300000	11450000
chr10	30650000	31800000
chr10	47500000	48150000
chr11	43300000	43950000
chr11	59150000	59500000
chr11	77650000	78100000
chr11	102700000	103050000
chr12	3250000	3850000
chr12	11550000	12050000
chr12	30850000	31250000
chr12	57750000	57850000
chr12	102850000	103700000
chr12	107000000	107100000
chr12	113950000	114600000
chr12	120200000	120250000
chr13	48800000	49250000
chr13	75850000	76950000
chr13	111350000	112500000
chr14	28700000	29550000
chr14	72450000	72950000
chr14	105550000	106300000
chr15	39800000	40000000
chr16	1950000	2050000
chr16	23700000	24500000
chr16	55900000	56350000
chr16	56350000	56600000
chr16	67250000	67350000
chr17	3000000	3700000
chr17	68750000	69300000
chr18	56600000	57600000
chr19	16300000	16550000
chr2	28950000	29200000
chr2	168950000	169400000
chr2	201200000	201750000
chr20	43450000	44200000
chr20	45800000	46000000
chr20	52200000	53550000
chr21	15600000	15900000
chr22	31950000	32500000
chr22	36250000	36400000
chr22	36400000	36500000
chr22	46650000	46800000
chr3	9350000	9800000
chr3	35950000	36800000
chr3	42000000	42200000
chr3	66900000	69000000
chr3	140900000	141250000
chr3	168100000	168850000
chr3	184450000	184800000
chr3	185600000	185850000
chr4	38800000	39450000
chr4	83650000	84550000
chr4	153750000	154700000
chr4	165100000	165500000
chr4	186250000	186600000
chr5	14700000	15050000
chr5	36800000	37350000
chr5	50900000	52800000
chr5	87400000	88700000
chr5	112500000	112950000
chr5	151600000	151800000
chr6	39200000	39350000
chr6	47350000	47800000
chr6	63300000	63850000
chr6	136350000	136600000
chr6	168050000	168350000
chr6	169750000	170100000
chr7	32500000	33150000
chr7	39550000	40200000
chr7	80550000	80650000
chr7	81500000	82750000
chr8	9900000	10450000
chr8	20400000	21950000
chr8	28400000	28500000
chr8	63200000	64500000
chr8	97600000	98150000
chr9	74750000	75150000
chr9	129700000	129800000
chrX	17750000	18350000
chrX	46950000	47150000
chrX	100800000	101350000
chr8	95150000	95300000
chr2	158850000	160050000
chr12	12750000	13100000
chr19	14100000	14500000
chr5	56900000	57300000
chr5	32600000	33450000
chr1	107750000	108200000
chr4	110000000	110550000
chr14	60550000	61250000
chr2	208350000	209300000
chr5	158050000	159150000
chr10	119600000	120850000
chr19	26400000	29600000
chr3	165200000	167350000
chr5	127550000	128200000
chr17	38300000	38700000
chr7	87250000	88200000
chr22	26350000	26700000
chr20	5450000	6150000
chr16	30400000	30700000
chr1	44050000	44700000
chr1	96950000	98500000
chr1	165100000	165350000
chr10	26800000	27400000
chr10	67800000	68350000
chr10	87000000	87500000
chr10	91800000	91950000
chr10	115150000	116500000
chr10	124000000	124450000
chr11	111500000	111850000
chr12	43400000	43950000
chr12	53500000	53600000
chr12	77000000	77950000
chr12	107650000	107900000
chr13	46800000	47800000
chr13	60450000	62000000
chr13	73750000	75300000
chr13	101150000	102900000
chr14	31250000	31400000
chr14	62150000	63300000
chr14	92050000	92800000
chr15	31550000	32550000
chr15	60400000	60550000
chr15	72250000	72700000
chr15	74850000	75000000
chr16	5100000	8550000
chr16	74400000	74550000
chr17	81400000	81650000
chr18	32100000	32600000
chr18	68750000	70150000
chr2	47350000	47800000
chr2	133850000	134950000
chr2	180100000	181100000
chr2	181100000	182150000
chr2	201750000	202300000
chr20	21650000	22300000
chr20	32750000	33350000
chr20	54650000	56350000
chr22	25150000	26350000
chr3	47450000	47800000
chr3	50300000	50550000
chr3	63900000	64000000
chr3	128600000	128950000
chr3	152550000	153000000
chr3	187200000	187700000
chr4	25950000	27050000
chr4	69300000	69650000
chr4	93800000	94600000
chr4	144100000	145100000
chr4	182900000	183150000
chr5	54900000	55150000
chr5	118950000	119450000
chr5	135400000	135850000
chr5	151800000	152500000
chr6	53950000	55250000
chr6	70200000	71050000
chr6	77550000	78850000
chr6	88900000	89350000
chr6	126000000	127250000
chr6	127550000	129450000
chr6	153000000	154100000
chr6	164100000	165850000
chr7	26700000	27150000
chr7	98950000	99400000
chr7	136050000	137600000
chr7	158400000	158600000
chr8	10450000	10850000
chr8	64500000	65600000
chr8	93650000	94000000
chr8	111850000	113450000
chr8	143150000	143300000
chr9	39900000	41100000
chr9	85800000	86100000
chr9	101400000	101500000
chr9	113200000	113700000
chr9	113700000	114350000
chrX	24250000	25200000
chr8	119800000	120100000
chr10	72200000	72350000
chr21	17300000	17650000
chr6	168350000	168900000
chr17	80000000	80400000
chr21	32350000	32600000
chr14	75000000	75300000
chr12	25400000	26050000
chr21	42950000	43700000
chr18	76350000	76750000
chr2	172150000	172600000
chr10	117400000	118500000
chr6	108550000	109100000
chrX	45200000	46450000
chr18	2600000	3250000
chr12	111750000	112450000
chr12	40950000	42100000
chrX	34350000	37000000
chr14	42200000	44850000
chr2	147950000	149000000
chr4	74200000	74700000
chr4	108600000	109400000
chr11	14500000	15250000
chr12	118400000	119650000
chr2	38850000	39850000
chrX	149850000	150750000
chr1	196700000	197400000
chr11	64250000	64750000
chr12	54450000	55700000
chrX	134450000	135700000
chr20	44950000	45800000
chr1	181200000	181450000
chr1	182700000	182850000
chr1	213100000	214200000
chr10	68350000	69050000
chr10	86400000	86650000
chr10	101800000	102150000
chr11	11800000	12150000
chr11	18850000	19900000
chr11	40300000	41450000
chr11	48200000	50850000
chr11	111350000	111500000
chr11	123600000	124600000
chr12	57850000	57950000
chr12	68100000	68850000
chr12	109100000	109400000
chr14	58450000	59100000
chr14	100650000	101700000
chr15	91000000	91200000
chr15	91250000	92100000
chr16	21200000	21350000
chr16	27150000	27500000
chr16	27500000	28300000
chr17	43000000	43250000
chr17	69300000	69550000
chr18	850000	2600000
chr19	55700000	57150000
chr2	20500000	20650000
chr2	32600000	33600000
chr2	136400000	137850000
chr2	188500000	189450000
chr2	197400000	197800000
chr20	40950000	41050000
chr22	20800000	21100000
chr3	56550000	57000000
chr3	102200000	102600000
chr3	134550000	136050000
chr3	139000000	139350000
chr4	36350000	37450000
chr4	38050000	38800000
chr4	64600000	67400000
chr4	118300000	118950000
chr4	163550000	164750000
chr5	33450000	34000000
chr5	54350000	54450000
chr5	97200000	98850000
chr5	129850000	131150000
chr6	20100000	20550000
chr6	109450000	110450000
chr6	133600000	134000000
chr6	168900000	169750000
chr7	43900000	44550000
chr7	48200000	49950000
chr7	56300000	58150000
chr7	71750000	73300000
chr7	88200000	90150000
chr7	112500000	113750000
chr8	86100000	86550000
chr8	102850000	103050000
chr8	103550000	104500000
chr8	130750000	132800000
chr9	86350000	87350000
chr9	99150000	100600000
chrX	30650000	32400000
chrX	40550000	41300000
chrX	93550000	100450000
chrX	124350000	129450000
chr1	94450000	94850000
chr4	158100000	158200000
chr19	1000000	1250000
chr16	3000000	4450000
chr2	101100000	101300000
chr4	73250000	74200000
chr7	45900000	47200000
chr15	67850000	68250000
chr5	91450000	93900000
chr1	12250000	12800000
chr19	1850000	2400000
chr2	149000000	149600000
chr19	16550000	17350000
chr6	132800000	133600000
chr1	67500000	68450000
chr14	37900000	39050000
chr3	37850000	39050000
chr5	136250000	137600000
chr12	77950000	79400000
chr14	39450000	42200000
chr4	174350000	174700000
chr18	61550000	62150000
chr5	64100000	65550000
chr8	75350000	78450000
chr13	22800000	23900000
chr7	44550000	45150000
chr1	18850000	19700000
chr1	6650000	7700000
chr1	68450000	70500000
chr1	222650000	223100000
chr1	243350000	244350000
chr10	28400000	28500000
chr11	44050000	44600000
chr11	131700000	133050000
chr12	15550000	15950000
chr12	96550000	96950000
chr13	26150000	26950000
chr13	43900000	44450000
chr15	76150000	77000000
chr16	53050000	53550000
chr16	75200000	75750000
chr17	2800000	3000000
chr17	60700000	61450000
chr17	64750000	65050000
chr17	79000000	79750000
chr2	44950000	45600000
chr2	86150000	86900000
chr2	172950000	174400000
chr2	216000000	216600000
chr20	36150000	36950000
chr20	56350000	57050000
chr20	58250000	59550000
chr21	28950000	29400000
chr21	32600000	33550000
chr22	40050000	40400000
chr3	62550000	63900000
chr3	158800000	159250000
chr4	55350000	55900000
chr5	69050000	69650000
chr5	115600000	116100000
chr5	128900000	129850000
chr6	7350000	7650000
chr6	55250000	56300000
chr6	150850000	151400000
chr7	14700000	16100000
chr7	38700000	39550000
chr7	79250000	80050000
chr7	85850000	86900000
chr7	101200000	101500000
chr7	135250000	136050000
chr8	27750000	28400000
chr8	102250000	102700000
chr8	120950000	122650000
chr9	71900000	72000000
chr9	87350000	87750000
chr9	119400000	120500000
chrX	140750000	145200000
chr19	3300000	3500000
chr7	17700000	18350000
chr11	61400000	61750000
chr12	89000000	89500000
chr12	119650000	120150000
chr1	223100000	223700000
chr7	108550000	111700000
chr12	94550000	95550000
chr10	94600000	95650000
chr16	30950000	32050000
chr11	70400000	71550000
chr5	122450000	123650000
chr12	1600000	3050000
chr7	144400000	146100000
chr14	86050000	87900000
chr4	95150000	98100000
chr14	25450000	28700000
chr3	96850000	98000000
chr2	10700000	11150000
chr2	7100000	8750000
chr12	103700000	104100000
chr2	24400000	25200000
chr19	15600000	16300000
chr2	161150000	163150000
chr10	79500000	80300000
chr19	9100000	10150000
chr1	21200000	21300000
chr1	95250000	96950000
chr1	113100000	113750000
chr11	31000000	32300000
chr11	123050000	123600000
chr13	27350000	28000000
chr13	29450000	30100000
chr13	46450000	46800000
chr13	95500000	95900000
chr14	90250000	90850000
chr15	77000000	77600000
chr16	30050000	30400000
chr17	45500000	45950000
chr18	8600000	9050000
chr18	24250000	25900000
chr2	62450000	63600000
chr2	191050000	191550000
chr2	212600000	213200000
chr2	236250000	237100000
chr2	238300000	239000000
chr22	44700000	45200000
chr3	3200000	4300000
chr3	42900000	44300000
chr3	99800000	100300000
chr3	137050000	138050000
chr3	154300000	155350000
chr4	106250000	107850000
chr4	165500000	166150000
chr4	170100000	172900000
chr4	183150000	183400000
chr5	115250000	115600000
chr7	27150000	28100000
chr7	35950000	36400000
chr7	36400000	37200000
chr7	157400000	158400000
chr8	28500000	29200000
chr8	51650000	52050000
chr9	84350000	85800000
chr9	123400000	124100000
chr8	38900000	40100000
chr6	41750000	42150000
chr17	43850000	45200000
chr1	177950000	178500000
chr1	32400000	33100000
chr10	63150000	63850000
chr7	76400000	79250000
chr15	58200000	59000000
chr18	9950000	11700000
chr14	32550000	33800000
chr7	120750000	122050000
chr3	30750000	32150000
chr2	227900000	229750000
chr10	128200000	130200000
chr5	146500000	147850000
chr11	111950000	112100000
chr9	114650000	115550000
chr20	35450000	35950000
chr11	62850000	64200000
chr19	3500000	4250000
chr1	1350000	2150000
chr1	112350000	112750000
chr11	56850000	57300000
chr11	116700000	117250000
chr11	129350000	129800000
chr12	108550000	109100000
chr13	49250000	49650000
chr13	67250000	69500000
chr13	78100000	79500000
chr13	106550000	107050000
chr14	67400000	67800000
chr14	104050000	104750000
chr15	56450000	57350000
chr16	58750000	62150000
chr17	45400000	45500000
chr17	65200000	66200000
chr18	74150000	74600000
chr19	37900000	38250000
chr2	102550000	102800000
chr2	174650000	176100000
chr2	196050000	197400000
chr20	34150000	34800000
chr20	47650000	48650000
chr3	75650000	77300000
chr3	101700000	102200000
chr4	9650000	10050000
chr4	12700000	13650000
chr4	57400000	62750000
chr4	110550000	112050000
chr7	23250000	23550000
chr8	13700000	16800000
chr8	52050000	52950000
chr8	140550000	140650000
chr9	131750000	132300000
chr6	47050000	47350000
chr7	95900000	97050000
chr2	65600000	66450000
chr12	65250000	66150000
chr8	105850000	106750000
chr17	17650000	18200000
chr7	151300000	152850000
chr6	104600000	105450000
chr5	58850000	59800000
chr8	8700000	9900000
chr8	42400000	44000000
chr21	34350000	34650000
chr5	93900000	94900000
chr2	222950000	223950000
chr9	4650000	5750000
chr2	158000000	158850000
chr7	62450000	64950000
chr1	94850000	95250000
chr22	21600000	21950000
chr3	128050000	128600000
chr5	116100000	118850000
chr7	1500000	2450000
chr1	174750000	175000000
chr1	235500000	236050000
chr10	34650000	35100000
chr10	75250000	77150000
chr11	26700000	27550000
chr11	44900000	45350000
chr11	78600000	81500000
chr11	128000000	128900000
chr13	69500000	70600000
chr16	2600000	3000000
chr16	62150000	66350000
chr17	66200000	66700000
chr2	15600000	16550000
chr2	146700000	147950000
chr20	25300000	25400000
chr22	33250000	35250000
chr22	46800000	49750000
chr3	196550000	197000000
chr4	40900000	41250000
chr5	37350000	38250000
chr5	142700000	142900000
chr5	146100000	146500000
chr6	2750000	3050000
chr6	4150000	5100000
chr6	138000000	138800000
chr7	51400000	54750000
chr8	8150000	8700000
chr8	60400000	61100000
chr8	138700000	140450000
chr22	46000000	46200000
chr17	43350000	43850000
chr2	210450000	211550000
chr15	92100000	92750000
chr17	82150000	82550000
chr4	172900000	173300000
chr9	72250000	72850000
chr15	35000000	37950000
chr19	33750000	36150000
chr19	48600000	50000000
chr2	75700000	79000000
chr20	11550000	13800000
chr2	20650000	24400000
chr4	168150000	168950000
chr7	23550000	24750000
chr2	27700000	28550000
chr3	42200000	42800000
chr1	59850000	60850000
chr10	50250000	50950000
chr11	22850000	26300000
chr11	92900000	93750000
chr14	89000000	89950000
chr15	85850000	88500000
chr16	52000000	53050000
chr16	69350000	70150000
chr17	36500000	37600000
chr18	70500000	72700000
chr2	39850000	41800000
chr2	61050000	61900000
chr22	45550000	46000000
chr3	33850000	35950000
chr3	53900000	56350000
chr3	65750000	66200000
chr3	69000000	70050000
chr3	146650000	148950000
chr3	150250000	150550000
chr4	10550000	11750000
chr4	150250000	151100000
chr5	54450000	54900000
chr6	155300000	157300000
chr7	22500000	23250000
chr7	25200000	25850000
chr7	65650000	67050000
chr7	92550000	93200000
chr8	18900000	19350000
chr8	100550000	101300000
chr9	124100000	124400000
chr9	125400000	126550000
chr9	130700000	131050000
chr9	133000000	134100000
chrX	41300000	43550000
chr12	124000000	124950000
chr15	85150000	85850000
chr10	11450000	11800000
chr17	76750000	77500000
chr12	88050000	89000000
chr13	53200000	57600000
chr1	182850000	183650000
chr5	149300000	149600000
chr7	16600000	16950000
chr7	90150000	90450000
chr2	177250000	178700000
chr1	22950000	23750000
chr1	245100000	246500000
chr14	99950000	100250000
chr15	45650000	47150000
chr15	47150000	48350000
chr15	52200000	52750000
chr2	55650000	56150000
chr2	79950000	84400000
chr20	38400000	39050000
chr20	57500000	58250000
chr22	21950000	23900000
chr4	78950000	80250000
chr4	168950000	169600000
chr5	133100000	134000000
chr6	82150000	83100000
chr6	99850000	104600000
chr8	126850000	127700000
chr9	19450000	21150000
chr9	114350000	114650000
chr9	124750000	125400000
chr1	116100000	116550000
chr11	69900000	70400000
chr1	225400000	226100000
chr2	227100000	227900000
chr1	231650000	233300000
chr4	145100000	147100000
chr6	63850000	70200000
chr5	31500000	32100000
chr15	68250000	69000000
chr9	122050000	122400000
chr1	36100000	36450000
chr14	95500000	96350000
chr4	127650000	129350000
chr15	42650000	43800000
chr17	8350000	9800000
chr19	38300000	39400000
chr21	37650000	39450000
chr1	200550000	201300000
chr10	112400000	113650000
chr11	36600000	38800000
chr13	33800000	35200000
chr13	107200000	108200000
chr14	63300000	64350000
chr16	16250000	18250000
chr16	48200000	48650000
chr21	15900000	17300000
chr22	41650000	42550000
chr3	64000000	64500000
chr3	116800000	118850000
chr3	150550000	151150000
chr5	174350000	174900000
chr6	53500000	53850000
chr6	80100000	82150000
chr7	37200000	37900000
chr7	122050000	123450000
chrX	10150000	11150000
chr12	96950000	98400000
chr2	235150000	235750000
chr22	18900000	19700000
chr10	132150000	133050000
chr21	25500000	26800000
chr12	26050000	27400000
chr11	96450000	100550000
chr3	160500000	161500000
chr3	37300000	37850000
chr6	71250000	72350000
chr1	47750000	50350000
chr4	98100000	99500000
chr6	116150000	119000000
chr14	71050000	72450000
chr17	69550000	70600000
chr2	102800000	105000000
chr3	15500000	16250000
chr3	93700000	96850000
chr3	163050000	165200000
chr5	1650000	4850000
chr6	143500000	144050000
chr7	5800000	6450000
chr17	19050000	19850000
chr5	56250000	56900000
chr7	22100000	22500000
chr6	154100000	155300000
chr2	42050000	42800000
chr8	58700000	60050000
chr7	20650000	22100000
chr9	87750000	89300000
chr3	102600000	105550000
chr5	75700000	76800000
chr13	39700000	40800000
chr2	33600000	36800000
chr12	80350000	81600000
chr3	100300000	101700000
chr1	52000000	53250000
chr1	219850000	220800000
chr10	31800000	33050000
chr12	79400000	80350000
chr13	97000000	97850000
chr14	59100000	60550000
chr15	99150000	99800000
chr2	13050000	15600000
chr22	23900000	24550000
chr4	2200000	3000000
chr5	76800000	77500000
chr5	131400000	132100000
chr6	149000000	149550000
chr8	140650000	141250000
chr9	115550000	116700000
chr20	47200000	47650000
chr11	15250000	16750000
chr12	62200000	63100000
chr3	197000000	197550000
chr10	58250000	59600000
chr3	24700000	25600000
chr5	81300000	82300000
chr3	58600000	62250000
chr10	77750000	78050000
chr1	184750000	185700000
chr9	76750000	78400000
chr4	15450000	16250000
chr11	73950000	75350000
chr2	36800000	37900000
chr1	43150000	44050000
chr10	16800000	20850000
chr4	67400000	69300000
chr17	51250000	54950000
chr18	22750000	23500000
chr3	170900000	171600000
chr7	113950000	116000000
chr8	2100000	7450000
chr9	129050000	129700000
chr4	137800000	138950000
chr14	34550000	35450000
chr4	184250000	185150000
chr9	89550000	90150000
chr13	51100000	51850000
chr9	78400000	83000000
chr2	225700000	227100000
chr18	36900000	42000000
chr10	118500000	119600000
chr4	158650000	159450000
chr1	85300000	87100000
chr4	53050000	54300000
chr5	32100000	32500000
chr7	16950000	17700000
chr1	92000000	93900000
chr6	157300000	158150000
chr8	37800000	38800000
chr6	14150000	15650000
chr2	113500000	117800000
chr12	93500000	94100000
chr12	63800000	64500000
chr9	131050000	131750000
chr16	88600000	89250000
chr11	114300000	116700000
chr12	114600000	115900000
chr4	37450000	38050000
chr4	129350000	136900000
chr7	75400000	76400000
chr8	96250000	97600000
chr16	13900000	14700000
chr3	192450000	193650000
chr8	98150000	100150000
chr15	32600000	33750000
chr10	63850000	67800000
chr1	187000000	192450000
chr11	128900000	129350000
chr10	6400000	7600000
chr12	89500000	90950000
chr6	25100000	26100000
chr20	8750000	9400000
chr2	149600000	152000000
chr10	78050000	79350000
chr11	85600000	86900000
chr3	10300000	11850000
chr1	13350000	15200000
chr5	21800000	31500000
chr6	105450000	106300000
chr8	124500000	125050000
chr13	76950000	77650000
chr20	20050000	21650000
chr5	159150000	160050000
chr8	117350000	119800000
chr11	110400000	111350000
chr15	92750000	93050000
chr2	18400000	19900000
chr2	219700000	222000000
chr3	107150000	108600000
chr8	33600000	36800000
chr10	20850000	23100000
chr8	29300000	30150000
chr10	74150000	75250000
chr4	141150000	143550000
chr20	14100000	16800000
chr1	8350000	8900000
chr1	237800000	240000000
chr15	94150000	98450000
chr2	105250000	106600000
chr9	116700000	119400000
chr7	12500000	13300000
chr13	108950000	110200000
chr18	43600000	45650000
chr13	85850000	91050000
chr10	80600000	84200000
chr11	19900000	20650000
chr11	27550000	29350000
chr14	96550000	99400000
chr7	13300000	14700000
chr5	67200000	69050000
chr12	91350000	92700000
chr13	91050000	94400000
chr12	15950000	18100000
chr1	78700000	83850000
chr2	53800000	55650000
chr1	192450000	196700000
chr17	63850000	64750000
chr3	28350000	30000000
chr9	109500000	110200000
chrX	12800000	13500000
chr14	33800000	34550000
chr10	87500000	89250000
chr5	59800000	62200000
chr12	14700000	15550000
chr12	121350000	122750000
chr16	85800000	87350000
chr7	47200000	47900000
chr17	70600000	72550000
chr12	69350000	71850000
chr2	99500000	100500000
chr3	39400000	41900000
chr2	127050000	129950000
chr1	199600000	200550000
chr8	68550000	69650000
chr8	129750000	130750000
chr3	71700000	72900000
chr17	66700000	68500000
chr5	41750000	42900000
chr12	57950000	62200000
chr14	81550000	86050000
chr16	53550000	55450000
chr8	36800000	37800000
chr8	122650000	123750000
chr12	75500000	76600000
chr16	72050000	74300000
chr11	90150000	92900000
chr3	172750000	176950000
chr21	18300000	25500000
chr9	94500000	95150000
chrX	38700000	40550000
chr6	6600000	7300000
chr15	79250000	81050000
chr2	19900000	20500000
chr1	234350000	235100000
chr10	7600000	9300000
chr17	56800000	58200000
chr7	67350000	70800000
chr3	176950000	178400000
chr1	207000000	209650000
chr16	80950000	83900000
chr14	67800000	68850000
chr8	127700000	129750000
chr7	33150000	35650000
chr1	165950000	169650000
chr9	12650000	14450000
chr3	4650000	8850000
chr8	60050000	60400000
chr6	121350000	123400000
chr2	101300000	102550000
chr21	26800000	27700000
chr7	146100000	148250000
chr5	10650000	13950000
chr14	89950000	90250000
chrX	115850000	118300000
chr1	41250000	41450000
chr1	112750000	113100000
chr1	150100000	150200000
chr11	120200000	120250000
chr12	25150000	25400000
chr12	111350000	111450000
chr15	30150000	30600000
chr15	91200000	91250000
chr17	34250000	34400000
chr20	36950000	37050000
chr21	5400000	6200000
chr22	39400000	39500000
chr3	27200000	27300000
chr4	107850000	107950000
chr5	138300000	138500000
chr6	132500000	132800000
chr9	94250000	94500000
chrX	79450000	80350000
chrX	154550000	154750000
chr2	16550000	16700000
chr2	207550000	208150000
chr3	157200000	157550000
chr3	79050000	79500000
chr15	43800000	44550000
chr4	136900000	137800000
chr2	154400000	155350000
chr5	141100000	141600000
chr1	53250000	53400000
chr10	25100000	26650000
chr10	73800000	74000000
chr11	6350000	6750000
chr11	14300000	14350000
chr12	3050000	3250000
chr12	7050000	7150000
chr12	90950000	91350000
chr14	61900000	62150000
chr15	88550000	88850000
chr16	2050000	2200000
chr16	57350000	57550000
chr17	28950000	29150000
chr17	65050000	65200000
chr19	12750000	12950000
chr2	17700000	18400000
chr2	74550000	74650000
chr2	101000000	101100000
chr22	20100000	20800000
chr4	174700000	175550000
chr5	40800000	41700000
chr6	15650000	16250000
chr6	37100000	37300000
chr6	42650000	42750000
chr6	97100000	97450000
chr8	12550000	13700000
chr9	4400000	4650000
chr9	41100000	42500000
chrX	62450000	65550000
chr18	3250000	4050000
chr11	69050000	69700000
chr11	30300000	31000000
chr2	121100000	121800000
chr9	136400000	136750000
chr6	78850000	79900000
chr1	159100000	160050000
chr12	8500000	9700000
chr1	20650000	21200000
chr1	32300000	32400000
chr1	33600000	34800000
chr1	121100000	122500000
chr1	156300000	156600000
chr1	161650000	161750000
chr10	15400000	16800000
chr11	1050000	1400000
chr12	94100000	94550000
chr13	18350000	19600000
chr15	30600000	31550000
chr15	57350000	57550000
chr16	19550000	19900000
chr17	49900000	50100000
chr17	74800000	74900000
chr19	4250000	4600000
chr19	8600000	9100000
chr2	6950000	7100000
chr2	164550000	164950000
chr2	174400000	174650000
chr20	49950000	50100000
chr21	31650000	32350000
chr22	19950000	20000000
chr3	42800000	42900000
chr4	55900000	56400000
chr4	85050000	86300000
chr4	103950000	104900000
chr4	120100000	121150000
chr4	140850000	141150000
chr4	173350000	173450000
chr5	900000	1150000
chr6	134000000	134100000
chr7	38350000	38700000
chr7	91850000	92550000
chr7	101500000	102500000
chr7	108000000	108150000
chr9	126550000	126800000
chr22	46350000	46550000
chr7	19700000	20650000
chr10	44950000	45200000
chr13	44450000	45000000
chr2	209300000	210250000
chr2	222000000	222650000
chr7	18350000	19700000
chr1	231300000	231650000
chr1	244350000	244800000
chr8	74350000	74900000
chr4	113250000	114400000
chr10	116500000	117200000
chr8	70700000	71800000
chr10	35600000	39600000
chr3	161500000	163050000
chr11	119350000	120200000
chr1	55050000	55250000
chr1	115100000	116100000
chr1	174250000	174750000
chr1	182450000	182700000
chr10	30350000	30650000
chr12	31250000	31650000
chr13	20050000	20150000
chr13	52300000	53050000
chr14	69550000	69650000
chr15	34050000	35000000
chr15	93050000	94150000
chr2	8750000	9150000
chr2	131150000	132150000
chr2	223950000	224350000
chr20	34800000	35350000
chr3	48200000	48650000
chr6	89350000	89900000
chr6	148550000	149000000
chr7	31150000	32200000
chr9	21800000	22450000
chrX	118300000	119350000
chr7	95500000	95600000
chr9	72850000	73200000
chr10	35150000	35600000
chr10	74000000	74150000
chr1	91200000	92000000
chr15	59650000	60400000
chr9	137250000	137650000
chr19	45750000	46600000
chr14	35850000	37200000
chr4	112050000	113250000
chrX	8800000	10000000
chrX	110400000	115850000
chr16	49950000	50800000
chr1	44700000	45600000
chr1	9600000	10250000
chr1	99750000	100900000
chr1	158150000	159100000
chr1	180500000	181200000
chr11	117250000	118150000
chr11	122550000	122950000
chr12	6050000	6300000
chr12	117950000	118400000
chr13	49650000	49900000
chr15	38400000	38700000
chr15	50950000	51500000
chr15	57550000	58200000
chr15	61850000	62350000
chr15	72700000	73250000
chr16	69200000	69350000
chr17	37600000	37900000
chr17	54950000	55500000
chr18	12300000	12700000
chr18	67200000	68750000
chr18	76750000	79350000
chr2	43900000	44950000
chr2	130400000	131150000
chr2	197800000	198300000
chr2	217750000	218150000
chr20	4650000	5200000
chr22	35600000	36250000
chr3	12550000	12900000
chr3	155350000	155750000
chr4	88550000	89150000
chr4	140350000	140850000
chr4	169600000	170100000
chr5	73700000	73850000
chr6	42150000	42650000
chr7	2450000	2750000
chr7	90450000	91050000
chr8	26650000	27300000
chr8	78450000	79650000
chr9	129800000	130700000
chrX	151700000	152900000
chr11	13050000	14300000
chr4	149950000	150250000
chr8	30600000	31200000
chr7	148250000	151300000
chr20	50950000	51350000
chr9	90900000	91750000
chr10	71300000	72200000
chr2	85650000	86150000
chr7	4700000	5200000
chr14	53350000	54400000
chr13	38950000	39700000
chr16	19900000	20750000
chr15	66900000	67850000
chr13	21550000	22800000
chr11	103650000	106100000
chr22	37350000	37600000
chr10	80300000	80600000
chr7	100400000	101200000
chr19	11550000	12700000
chr6	31550000	32050000
chr1	42800000	43150000
chr1	98500000	99750000
chr1	209800000	210200000
chr10	91950000	92500000
chr10	110300000	110650000
chr11	12150000	12300000
chr11	18000000	18850000
chr11	87400000	89700000
chr12	49250000	49700000
chr12	64600000	64750000
chr13	35200000	35900000
chr13	84850000	85850000
chr14	51250000	52050000
chr15	81350000	82400000
chr16	2200000	2550000
chr17	60050000	60700000
chr18	13800000	15500000
chr18	42000000	43600000
chr19	18300000	18450000
chr2	160050000	161150000
chr2	170900000	171550000
chr20	49250000	49550000
chr20	57050000	57450000
chr21	44300000	44850000
chr22	39150000	39400000
chr3	49600000	50300000
chr3	120600000	121500000
chr3	149850000	150250000
chr4	81400000	82350000
chr5	139400000	139750000
chr6	72350000	73550000
chr7	85050000	85850000
chr7	86900000	87250000
chr7	130050000	130850000
chr8	74900000	75350000
chr8	141400000	143150000
chr9	121300000	121450000
chr9	124450000	124750000
chrX	46450000	46950000
chrX	66750000	68150000
chr17	76600000	76750000
chr6	10450000	11600000
chr3	168850000	169800000
chr22	32500000	33250000
chr18	9050000	9550000
chr7	80050000	80550000
chr1	55250000	56800000
chr2	171550000	172150000
chr2	25200000	26800000
chr14	21600000	24450000
chr2	155350000	157250000
chr2	74650000	75700000
chr3	126500000	127550000
chr8	125700000	126850000
chr14	52050000	53350000
chr3	81350000	86650000
chr7	111700000	112500000
chr1	6000000	6650000
chr5	137600000	138150000
chr17	81850000	82150000
chr16	4450000	5100000
chr1	201850000	202150000
chr1	247350000	248250000
chr10	86650000	87000000
chr12	81600000	82500000
chr12	95550000	95900000
chr12	132100000	132550000
chr13	25400000	26150000
chr15	37950000	38400000
chr15	59050000	59550000
chr19	43400000	44550000
chr2	10100000	10450000
chr2	47800000	50500000
chr2	97550000	98600000
chr2	137850000	138850000
chr2	176100000	177150000
chr20	46000000	46700000
chr22	45200000	45550000
chr3	186600000	186800000
chr4	88200000	88550000
chr4	114750000	116050000
chr5	82300000	83650000
chr5	112950000	113600000
chr6	89900000	90550000
chr7	42900000	43900000
chr7	91050000	91850000
chr7	119200000	120750000
chr7	143500000	144150000
chrX	109900000	110400000
chr22	49750000	50100000
chr11	100550000	100950000
chr19	18450000	19000000
chr7	54750000	55300000
chr19	33150000	33750000
chr10	91300000	91800000
chr20	48650000	49200000
chr14	80950000	81550000
chr3	77300000	78650000
chr13	57600000	60450000
chr17	9800000	12050000
chr11	33800000	34500000
chr1	33100000	33500000
chr3	9800000	10300000
chr1	19700000	20550000
chr10	33050000	34650000
chr10	101050000	101650000
chr12	68850000	69350000
chr14	69100000	69550000
chr14	75400000	75600000
chr17	73400000	74250000
chr2	45950000	46450000
chr20	51350000	52200000
chr5	34450000	35000000
chr7	28100000	28900000
chr7	40200000	41850000
chr8	123750000	124500000
chr9	33050000	33300000
chr9	98800000	99150000
chr9	122850000	123400000
chr10	73200000	73800000
chr1	30750000	31600000
chr13	45350000	46450000
chr4	77650000	78950000
chr22	43200000	44700000
chr6	113950000	116150000
chr18	32600000	34850000
chr6	90550000	95150000
chr3	127550000	128050000
chr7	55350000	56300000
chr1	172750000	173400000
chr1	201300000	201400000
chr1	211650000	212450000
chr11	45350000	45850000
chr15	26850000	28150000
chr15	33750000	34050000
chr16	8550000	9150000
chr18	30950000	32100000
chr2	71100000	71500000
chr20	46700000	47200000
chr4	116050000	118300000
chr5	113600000	115150000
chr5	174900000	176500000
chr6	31150000	31550000
chr6	150000000	150400000
chr7	80650000	81500000
chr8	86550000	89700000
chr8	109750000	111850000
chr9	5750000	6800000
chr9	68200000	69050000
chr1	236050000	236550000
chr13	72750000	73750000
chr12	42400000	43400000
chr6	136600000	137700000
chr16	10500000	10950000
chr4	94600000	95150000
chr9	70050000	70600000
chr1	220800000	222500000
chr1	11000000	12250000
chr4	4950000	6600000
chr4	17500000	18650000
chr4	109400000	110000000
chr11	93750000	94550000
chr4	51650000	53050000
chr10	125850000	128200000
chr12	53700000	54300000
chr1	16950000	17450000
chr1	93900000	94450000
chr1	152500000	153300000
chr1	163350000	165100000
chr10	12200000	13150000
chr10	48150000	49550000
chr12	27700000	29050000
chr14	78900000	80950000
chr19	10400000	10800000
chr19	29600000	30650000
chr19	57150000	57900000
chr2	61900000	62450000
chr20	22300000	23650000
chr20	49550000	49950000
chr22	39500000	40050000
chr4	7100000	8650000
chr6	35250000	35500000
chr6	137700000	138000000
chr9	90150000	90900000
chrX	71850000	72200000
chr1	151950000	152050000
chr6	158700000	159150000
chr20	24950000	25300000
chr1	218250000	219850000
chr19	39400000	40650000
chr4	107950000	108600000
chr4	123000000	124300000
chr17	30100000	30800000
chr7	104900000	105600000
chr13	79550000	81050000
chr7	94400000	95500000
chr14	31400000	32550000
chr13	81050000	84850000
chrX	19350000	20350000
chr17	7200000	8050000
chr10	1100000	3150000
chr10	130200000	132150000
chr12	66150000	68000000
chr12	107100000	107650000
chr2	132150000	133850000
chr2	183250000	186850000
chr2	222650000	222950000
chr2	224350000	225700000
chr3	195600000	196000000
chr5	80350000	81300000
chr6	106300000	107000000
chr8	107800000	108800000
chr9	95150000	96300000
chr2	84900000	85450000
chr5	171400000	172450000
chr9	15150000	15700000
chr1	233300000	234200000
chr1	153400000	154350000
chr6	166150000	167150000
chr3	159250000	160500000
chr11	94550000	95800000
chr3	64500000	65750000
chr12	18100000	19450000
chr16	14700000	16250000
chr16	80500000	80950000
chr2	70300000	71100000
chr1	17450000	18600000
chr10	52250000	52650000
chr10	97700000	98400000
chr10	98400000	99350000
chr11	73350000	73950000
chr11	83800000	84700000
chr14	76800000	77100000
chr15	75000000	76050000
chr16	12100000	13900000
chr2	111850000	113050000
chr7	105600000	106150000
chr9	73200000	74750000
chrX	48550000	49750000
chrX	72200000	74450000
chr17	74900000	75800000
chr3	8850000	9350000
chr7	5200000	5800000
chr21	42150000	42900000
chr3	194600000	195600000
chrX	43800000	45200000
chr21	14200000	15600000
chr4	22850000	24450000
chr9	22450000	27300000
chr14	75600000	76700000
chr10	43500000	44950000
chr20	37550000	38400000
chr20	44200000	44950000
chr10	45200000	46300000
chr10	109850000	110200000
chr11	126300000	128000000
chr12	39300000	40950000
chr13	51850000	52250000
chr14	68850000	69100000
chr15	64150000	65300000
chr2	152000000	152700000
chr2	163150000	164550000
chr2	199900000	200850000
chr3	70500000	71700000
chr6	119100000	121350000
chr7	41850000	42900000
chr5	1150000	1650000
chr10	23100000	24600000
chr17	13100000	15200000
chr2	138850000	143050000
chr20	31750000	32700000
chr18	35050000	36900000
chr12	45000000	46000000
chr20	19700000	20050000
chr21	36100000	36400000
chr4	104900000	106250000
chr5	157150000	157750000
chr6	53100000	53500000
chr7	123450000	124950000
chr4	155850000	158000000
chr6	139350000	141650000
chr3	73100000	75200000
chr2	232550000	233900000
chr6	39350000	41050000
chr15	82400000	84150000
chr2	191550000	196050000
chr1	36450000	37450000
chr12	101900000	102850000
chr5	126600000	127550000
chr8	27300000	27750000
chr11	16750000	17550000
chr19	2400000	3300000
chr9	33300000	34650000
chr1	37450000	37900000
chr1	211300000	211650000
chr11	65350000	65600000
chr12	82500000	84850000
chr18	21850000	22750000
chr2	64900000	65600000
chr22	38000000	38700000
chr5	90800000	91450000
chr6	56300000	58600000
chr6	160700000	161400000
chr8	30150000	30600000
chr5	36050000	36750000
chr12	32350000	32750000
chr14	99400000	99950000
chr20	41050000	41700000
chr1	51250000	51950000
chr7	107150000	108000000
chr6	16250000	17100000
chr5	147850000	148750000
chr13	30100000	31100000
chr4	180700000	182900000
chr15	77900000	79250000
chr4	41250000	42950000
chr14	45300000	49550000
chr2	38050000	38850000
chr2	240500000	241450000
chr1	25250000	25850000
chr1	206450000	207000000
chr15	88850000	89300000
chr18	47750000	48450000
chr2	234550000	235150000
chr3	24000000	24700000
chr6	1500000	2750000
chr9	1000000	2850000
chr9	83000000	83600000
chrX	135900000	138100000
chr7	2750000	4600000
chr4	118950000	120100000
chr10	42100000	43500000
chr1	10450000	11000000
chr1	39800000	40050000
chr11	10750000	11800000
chr13	23900000	25400000
chr16	78100000	80500000
chr18	64000000	67200000
chr2	124000000	127050000
chr21	29400000	31100000
chr3	17850000	18900000
chr5	72350000	73550000
chr5	173600000	174350000
chr8	80600000	81100000
chr22	42550000	43200000
chr3	129300000	130100000
chr1	146350000	148650000
chr10	27400000	28400000
chr1	155200000	156050000
chr10	104350000	109850000
chr11	78100000	78600000
chr12	92700000	93500000
chr20	39050000	40950000
chr3	108600000	111650000
chr8	40200000	41100000
chr1	7950000	8350000
chr8	109350000	109750000
chr20	53550000	54100000
chr1	41450000	42150000
chr5	77500000	80350000
chr2	9150000	10100000
chr5	38300000	39550000
chr1	22050000	22650000
chr11	17550000	18000000
chr11	82700000	83800000
chr11	129800000	130200000
chr20	17500000	18350000
chrX	23650000	24250000
chr3	148950000	149400000
chr5	57300000	58500000
chr11	101450000	102700000
chr5	73850000	75700000
chr18	12700000	13800000
chr1	70500000	71100000
chr6	50800000	52100000
chr8	106750000	107800000
chr9	108800000	109500000
chr18	9550000	9950000
chr12	47700000	48700000
chr3	124700000	126500000
chr8	45900000	47850000
chr1	226400000	227500000
chr1	31600000	32300000
chr1	210350000	211300000
chr13	102900000	106550000
chr3	153000000	154300000
chr9	2850000	4400000
chr17	30800000	31900000
chr22	29300000	30100000
chr1	241550000	243350000
chr3	27300000	27700000
chr5	66250000	67200000
chr5	141600000	142700000
chr6	112250000	113950000
chr17	80400000	81400000
chr10	120850000	123550000
chr3	118850000	120600000
chr12	122750000	123700000
chr4	24450000	25400000
chr16	89250000	89600000
chr3	182700000	183400000
chr1	161750000	162700000
chr6	34150000	35250000
chr7	132600000	135050000
chr2	143050000	146700000
chr1	117950000	120200000
chr1	183650000	184750000
chr8	57400000	58500000
chr3	66200000	66900000
chr13	42300000	43900000
chr8	89700000	93650000
chr4	138950000	140350000
chr10	59600000	60800000
chr10	124450000	125850000
chr1	154350000	155200000
chrX	47150000	48050000
chr10	96350000	97700000
chr4	186600000	189500000
chr5	155000000	157150000
chr15	69450000	70550000
chr7	50400000	51250000
chr11	47400000	48200000
chr6	32050000	34150000
chr3	143800000	146650000
chr12	21200000	25150000
chr5	150450000	151600000
chr21	36400000	37650000
chr3	193650000	194400000
chr3	169800000	170900000
chr1	223700000	224450000
chr15	99800000	101250000
chr7	138950000	140650000
chr6	20550000	25100000
chr15	98450000	99100000
chr21	41100000	42150000
chr2	118950000	120700000
chr5	168250000	171400000
chr1	64250000	66750000
chr3	19900000	24000000
chr6	7650000	10450000
chr13	97850000	100600000
chr10	28600000	30350000
chr5	35000000	36050000
chr15	38700000	39800000
chr3	141250000	143800000
chr15	23050000	26850000
chr15	70550000	72250000
chr9	107400000	108800000
chr10	77150000	77750000
chr10	3150000	4800000
chr16	85050000	85800000
chr12	115900000	117150000
chr8	113450000	117350000
chr6	27850000	29650000
chr17	8050000	8350000
chr1	46100000	46350000
chr12	117150000	117950000
chr1	146100000	146300000
chr17	40250000	40450000
chrX	37300000	38200000
chrX	85050000	85600000
chr14	73500000	73550000
chr17	5300000	5500000
chr19	53800000	55050000
chr5	140750000	141100000
chrX	38200000	38700000
chr2	233900000	234550000
chr12	48750000	49050000
chr1	206150000	206450000
chr10	123550000	124000000
chr12	47000000	47700000
chr22	36500000	37350000
chr19	10800000	11550000
chr10	46550000	47450000
chr11	5050000	6350000
chr17	40000000	40200000
chr6	107000000	107950000
chr11	59500000	60750000
chr12	9700000	10200000
chr10	99350000	99700000
chr17	29550000	30100000
chr3	47800000	48200000
chr5	176600000	177100000
chr7	16100000	16600000
chr8	20200000	20400000
chr8	23000000	23450000
chrX	138750000	140000000
chrX	17100000	17750000
chr1	88900000	89900000
chr1	38000000	38850000
chr17	58500000	59200000
chr19	10150000	10400000
chr2	129950000	130400000
chr3	36800000	37300000
chr8	22600000	23000000
chr9	137150000	137250000
chrX	49850000	50650000
chrX	131750000	132650000
chr3	39050000	39400000
chr22	40400000	40900000
chr7	45150000	45900000
chr3	184800000	185600000
chr1	116550000	117100000
chr3	121500000	122350000
chr1	77150000	78100000
chr12	43950000	45000000
chr13	112900000	113650000
chr17	40450000	40600000
chr18	62150000	63000000
chr8	23450000	25100000
chrX	150750000	151100000
chr1	178500000	179050000
chr12	53050000	53400000
chr15	84550000	85150000
chr19	7350000	7900000
chr22	37600000	38000000
chr3	186800000	187200000
chr4	80250000	81400000
chr20	61950000	62850000
chr3	183400000	183850000
chr8	22150000	22600000
chr5	65550000	66250000
chr4	185150000	186250000
chr2	85450000	85650000
chr1	26450000	26950000
chr11	86900000	87400000
chr12	109400000	109900000
chr16	74650000	75200000
chr17	31900000	32950000
chr2	135850000	136400000
chr2	202550000	203950000
chr6	129450000	130850000
chr6	138800000	139350000
chr7	129150000	129900000
chr12	95900000	96550000
chrX	78100000	79450000
chr11	76700000	77650000
chr12	32750000	34050000
chr14	64350000	64850000
chr2	46900000	47350000
chr2	178700000	180100000
chr4	54300000	55350000
chr8	17200000	17800000
chr10	89250000	89750000
chr15	65300000	66400000
chr6	49500000	49900000
chr16	18750000	19550000
chr11	10400000	10750000
chr12	49700000	50100000
chr13	28000000	28800000
chr16	77650000	78100000
chr3	179000000	179600000
chr2	42800000	43600000
chr7	24750000	25200000
chr16	38300000	48200000
chr16	66900000	67250000
chr7	99400000	100400000
chr1	114300000	115100000
chr10	95900000	96350000
chr15	55200000	56300000
chr17	74250000	74750000
chr5	160450000	163450000
chr9	18200000	19450000
chr2	28550000	28950000
chr1	105850000	107750000
chr5	172450000	172950000
chr7	156900000	157400000
chr17	72550000	73300000
chr19	44550000	45450000
chr16	22600000	23700000
chr1	110050000	110500000
chr11	32300000	33800000
chr13	108200000	108950000
chr14	103550000	104050000
chr3	151150000	152550000
chr2	30700000	32600000
chr17	15200000	17250000
chr1	40450000	41000000
chr17	34400000	35900000
chr18	20550000	21850000
chr8	31200000	33600000
chr5	139750000	140750000
chr6	131600000	132350000
chr1	117100000	117950000
chr14	37200000	37900000
chrX	16700000	17100000
chr18	25900000	29850000
chr14	65000000	67400000
chr1	27750000	29250000
chr11	100950000	101450000
chr20	62850000	63700000
chr6	134100000	135450000
chr8	94000000	95150000
chr11	130400000	130900000
chr17	79750000	80000000
chr1	204400000	205300000
chr21	44850000	46000000
chr5	96600000	97200000
chr3	113000000	115850000
chr16	24500000	25250000
chr20	59550000	61950000
chr12	50100000	51400000
chr19	41900000	43400000
chr5	13950000	14700000
chr9	111400000	112050000
chr14	61250000	61900000
chr16	87700000	88600000
chr8	25100000	26650000
chr11	124600000	125900000
chr1	175000000	176900000
chr13	75300000	75850000
chr15	69000000	69450000
chr7	106150000	107150000
chr8	80050000	80600000
chr1	182050000	182450000
chr6	151400000	153000000
chr1	46350000	47150000
chr1	230350000	231300000
chr1	240000000	241550000
chr12	104100000	105200000
chr17	78150000	78900000
chr6	29650000	31150000
chr2	166450000	168950000
chr12	52000000	53050000
chr13	40800000	42300000
chr5	153950000	155000000
chr1	203850000	204400000
chr11	45850000	47400000
chr16	67500000	69200000
chr1	214650000	215650000
chr1	229550000	230350000
chr5	148750000	149300000
chr17	4100000	5300000
chr2	216650000	217750000
chr3	189950000	192450000
chr2	213200000	216000000
chr4	75900000	77250000
chr1	53800000	55050000
chr5	16450000	17200000
chr17	55500000	56800000
chr5	142900000	144150000
chr14	49550000	50850000
chr3	57000000	58600000
chr3	32150000	33850000
chr3	139350000	140900000
chr14	90850000	92050000
chr8	132800000	133500000
chr6	37300000	39200000
chr21	39450000	41100000
chr9	120500000	121300000
chr6	17100000	18550000
chr10	4800000	6400000
chr3	171600000	172750000
chr3	132700000	134550000
chr11	35450000	36350000
chr6	11600000	13300000
chr3	14150000	15500000
chr7	140650000	143500000
chr11	6750000	10400000
chr11	34500000	35450000
chr8	101300000	102250000
chr14	94050000	95500000
chr12	54300000	54450000
chr22	19700000	19800000
chr19	1250000	1850000
chr3	128950000	129300000
chr2	26800000	27350000
chr3	50550000	51450000
chrX	103500000	106850000
chr19	7900000	8600000
chr6	42900000	43550000
chr4	4200000	4950000
chr19	55050000	55700000
chr11	60750000	61400000
chr5	119450000	122100000
chr6	41350000	41750000
chr11	2150000	3300000
chr6	110450000	111250000
chr1	25850000	26450000
chr16	28300000	28700000
chr18	11700000	12300000
chr22	35250000	35600000
chrX	129450000	130950000
chr1	145400000	146050000
chr12	101400000	101900000
chr18	23500000	24150000
chr5	4850000	7850000
chr1	113750000	114300000
chr11	12300000	12950000
chr1	160050000	160650000
chr19	14500000	15600000
chr10	113650000	114150000
chr20	33350000	34150000
chr1	21300000	22050000
chr11	75350000	76700000
chr3	45000000	46550000
chr19	47250000	47850000
chr4	44700000	49300000
chr18	54150000	56600000
chr14	77100000	78900000
chr19	40650000	41900000
chr3	12900000	14150000
chr12	112450000	113950000
chr13	110200000	111150000
chr16	57550000	58750000
chr2	218150000	219700000
chr17	61600000	63850000
chr5	178200000	179600000
chr5	52800000	54350000
chr9	110200000	111400000
chr16	10950000	12100000
chr1	179050000	180200000
chr9	126800000	128150000
chr10	99700000	101050000
chr9	97650000	98800000
chr15	41400000	42550000
chr14	73550000	74300000
chrX	15300000	16700000
chr9	92100000	94000000
chr11	67800000	68950000
chr15	89600000	90200000
chr8	72200000	74350000
chr5	55150000	56250000
chr4	151100000	153750000
chr1	108200000	110050000
chr6	35500000	37100000
chr17	50100000	51050000
chr12	46000000	47000000
chr3	156000000	157200000
chr21	34650000	36100000
chr20	50100000	50900000
chr8	65700000	66600000
chr10	92500000	94600000
chr18	57600000	59100000
chr3	187700000	189950000
chr1	15750000	16450000
chr1	23750000	24650000
chr2	95350000	97200000
chr11	72550000	73350000
chr17	42550000	43000000
chr9	96300000	96750000
chr1	110500000	111450000
chr1	228650000	229550000
chr20	2450000	4100000
chr17	1050000	2350000
chr1	8900000	9600000
chr16	70750000	72050000
chr17	41700000	42550000
chr17	75800000	76600000
chr7	137900000	138850000
chr8	10850000	12150000
chr1	151050000	151900000
chr11	113300000	114300000
chr13	20150000	21550000
chr22	17050000	18200000
chr16	56600000	57350000
chr5	149600000	150450000
chr10	60800000	63150000
chr19	19550000	24450000
chr6	3050000	4150000
chr9	112050000	113200000
chr11	106100000	108700000
chr10	13150000	15300000
chr17	40600000	41700000
chr6	95300000	97100000
chr19	17350000	18300000
chr17	48650000	49900000
chr1	26950000	27750000
chr19	50300000	53800000
chr15	40000000	40900000
chr5	132100000	132850000
chr4	6600000	7100000
chr9	37450000	39600000
chr11	65600000	67800000
chr22	30100000	31950000
chr13	31850000	33800000
chr1	203000000	203850000
chr12	120250000	121350000
chr17	45950000	48650000
chr7	28900000	31150000
