# Supplementary material for: Chromatin topology defines estradiol-primed progesterone receptor and PAX2 binding in endometrial cancer cells
Source: eLife journal article supplement (doi:10.7554/elife.66034), 2022-01-12
Supplement: supp [file elife-66034-supp-v1.zip › elife_poa_e66034_Figure_6_source_data_2.txt]

chr1	14976339	14977774
chr1	61424138	61447183
chr1	78003875	78005040
chr1	107738782	107748568
chr1	162223966	162235856
chr1	172351497	172357060
chr1	198598545	198623120
chr1	198755914	198764119
chr10	59793978	59808081
chr10	59962355	59996509
chr11	15657163	15664453
chr11	30422270	30424338
chr11	101261964	101299985
chr11	130695669	130728760
chr12	31721926	31786075
chr12	42643653	42670048
chr12	65308769	65309707
chr12	69085827	69108471
chr12	74941728	74946218
chr12	97556021	97576288
chr13	33369283	33404976
chr13	69921163	69955568
chr13	100398267	100400499
chr14	25078122	25092731
chr14	32679708	32714341
chr14	53850771	53873410
chr14	68168268	68173129
chr15	33110847	33135846
chr15	65295842	65305448
chr15	71495159	71550256
chr15	74642193	74664723
chr15	92705707	92725668
chr17	43434368	43457597
chr17	71631422	71636192
chr18	3538572	3542181
chr18	22821854	22872276
chr18	26440590	26511995
chr18	33168928	33184521
chr2	67144944	67166140
chr2	67894983	67899738
chr2	70596678	70616658
chr2	102114949	102132197
chr2	146615780	146625380
chr2	159062908	159091867
chr2	182816770	182840542
chr2	182890178	182916916
chr2	209472595	209496779
chr2	211396713	211432631
chr2	232374896	232378773
chr2	234241852	234244245
chr20	10861250	10867647
chr3	29466132	29486488
chr3	30334318	30371205
chr3	79552491	79592056
chr3	79651372	79653712
chr3	79917601	79940610
chr3	89787606	89796030
chr3	169244154	169306122
chr4	4481197	4522369
chr4	18930444	18939130
chr4	19738900	19776495
chr4	30757137	30789884
chr4	73675498	73705272
chr4	76517237	76563933
chr4	85092612	85095373
chr4	87117394	87130976
chr4	138112756	138199982
chr4	156763231	156779520
chr4	156906167	156949890
chr5	20353337	20360765
chr5	31106093	31121800
chr5	36422787	36451095
chr5	56356266	56357814
chr5	57803482	57825740
chr5	92145891	92148092
chr5	103724211	103744491
chr5	103867749	103924798
chr5	123809362	123814803
chr5	124649442	124662954
chr5	124736519	124746837
chr5	125175268	125176596
chr6	6678627	6726217
chr6	11364974	11412953
chr6	11472807	11479659
chr6	18457103	18504095
chr6	35590600	35602434
chr6	74741667	74774866
chr6	75333361	75351828
chr6	122033436	122099011
chr6	130902877	130908592
chr6	136058831	136068248
chr6	139973979	139979815
chr7	12706624	12716343
chr7	12860909	12866724
chr7	18408502	18427426
chr7	20241238	20250281
chr7	46908925	46934128
chr7	46969048	46983789
chr7	47036365	47040369
chr7	77281466	77284522
chr7	77309525	77329065
chr7	84022383	84061448
chr7	84291523	84303271
chr7	84477759	84492756
chr7	112420418	112423266
chr7	130868043	130928130
chr7	130994541	131040253
chr7	144820960	144828171
chr8	32226850	32229337
chr8	74985025	75004480
chr8	77565552	77567476
chr8	127870507	127890386
chr8	128536531	128556866
chr9	1707230	1708658
chr9	3698128	3733512
chr9	3906728	3951622
chr9	26243607	26262665
chr9	73109166	73183814
chr9	82488678	82489765
chr9	82923315	82924813
chrX	45747751	45756995
