# Supplementary material for: Chromatin topology defines estradiol-primed progesterone receptor and PAX2 binding in endometrial cancer cells
Source: eLife journal article supplement (doi:10.7554/elife.66034), 2022-01-12
Supplement: supp [file elife-66034-supp-v1.zip › elife_poa_e66034_Figure_7_source_data_1.txt]

ZFHX4
UPK3B
UNC80
SYCP2L
SSC4D
SOST
SLCO3A1
SCG5
OTOP1
NTNG1
NOL4
NHLRC1
MPP3
MEOX1
LRRC38
LMAN1L
LHFPL5
KLHL1
IBSP
HMGA2
FIGLA
ELOVL2
DUSP26
DTNA
DMRT2
DAPL1
CYP1A2
CLPSL2
CLPSL1
CLPS
CLEC4F
CHRNG
CDH18
CDH10
ATP6V1B1
ARL4C
AQP4
ADD2
ABCB5
TMEM232
STX18
STMND1
SPARCL1
SEMA3D
SCIN
RNF113B
RASSF6
PRSS56
PPBP
PODXL
PI16
PGR
NPAS3
MYOC
MSX1
MAK
LYZ
LRRC19
IL1RL1
GZMH
GZMB
GRIA2
GPR18
GLIPR1L1
GCM2
FMN1
FGD2
FAM47E
ETV7
EPHA3
ELAVL2
ECEL1
DTHD1
DNAJC10
DCDC1
CXCL9
CXCL8
CXCL5
CXCL3
CXCL2
CXCL11
CXCL10
CPS1
CPM
CLVS2
CD207
CD109
CCDC178
CCDC146
BNIP5
BMP4
ART3
ARL4D
ALPP
ALPG
ALDH1A1
AK5
AFP
AFM
ADAMTS8
ACTBL2
ACADL
