# Supplementary material for: Chromatin topology defines estradiol-primed progesterone receptor and PAX2 binding in endometrial cancer cells
Source: eLife journal article supplement (doi:10.7554/elife.66034), 2022-01-12
Supplement: supp [file elife-66034-supp-v1.zip › elife_poa_e66034_Figure_7_source_data_2.txt]

PRAMEF19
PRAMEF17
PRAMEF20
LRRC38
PDPN
PRDM2
KAZN
TMEM51
NFIA
TM2D1
PATJ
PIGK
AK5
AC118549.1
USP33
MIGA1
NEXN
FUBP1
DNAJB4
GIPC2
PRMT6
NTNG1
VAV3
DUSP12
ATF6
OLFML2B
NOS1AP
AL512785.2
SPATA46
C1orf226
SH2D1B
UHMK1
UAP1
DDR2
PRRC2C
MYOCOS
MYOC
VAMP4
EEF1AKNMT
DNM3
PIGC
C1orf105
SUCO
FASLG
PTPRC
PTPRC
MEIS1
ETAA1
FAM136A
TGFA
ADD2
FIGLA
CLEC4F
CD207
VAX2
ATP6V1B1
AC007040.2
ANKRD53
TEX261
NAGK
RNF149
CREG2
RFX8
MAP4K4
IL1R2
IL1R1
IL1RL2
IL1RL1
IL18R1
IL18RAP
SLC9A4
KYNU
ARHGAP15
GTDC1
ZEB2
DAPL1
TANC1
WDSUB1
BAZ2B
MARCH7
CD302
LY75-CD302
LY75
PLA2R1
DNAJC10
FRZB
NCKAP1
DUSP19
NUP35
MAP2
UNC80
RPE
KANSL1L
ACADL
LANCL1
CPS1
ERBB4
PDE6D
COPS7B
NPPC
DIS3L2
ALPP
ALPG
ALPI
ECEL1
PRSS56
CHRND
CHRNG
TIGD1
TRPM8
SPP2
ARL4C
ZCWPW2
AC098650.1
RBMS3
RBMS3
TGFBR2
GADL1
ROBO1
C3orf38
CSNKA2IP
EPHA3
MECOM
ACTRT3
MYNN
LRRC34
OTOP1
TMEM128
LYAR
ZBTB49
NSG1
STX18
MSX1
SLIT2
PACRGL
PCDH7
ARAP2
DTHD1
ANKRD17
ALB
AFP
AFM
RASSF6
CXCL8
CXCL6
PF4V1
CXCL1
PF4
PPBP
CXCL5
CXCL3
CXCL2
MTHFD2L
PPEF2
NAAA
SDAD1
CXCL9
ART3
CXCL10
CXCL11
NUP54
SCARB2
FAM47E
FAM47E-STBD1
STBD1
CCDC158
SHROOM3
SOWAHB
SEPTIN11
CCNI
CCNG2
ARHGAP24
MAPK10
AC093827.5
AFF1
KLHL8
HSD17B13
HSD17B11
NUDT9
SPARCL1
DSPP
DMP1
IBSP
MEPE
SPP1
PKD2
ABCG2
SLC7A11
ASIC5
TDO2
CTSO
PDGFC
GLRB
GRIA2
CDH18
CDH12
CDH12
PRDM9
CDH10
CDH9
CDH6
DROSHA
UGT3A2
LMBRD2
SKP2
NADK2
RANBP3L
SLC1A3
C5orf67
MAP3K1
ACTBL2
PLK2
GAPT
NR2F1
FAM172A
POU5F2
NUDT12
EFNA5
FBXL17
FER
PJA2
MAN2A1
TMEM232
ZNF608
GRAMD2B
LY86
RREB1
SSR1
GCNT2
C6orf52
PAK1IP1
TMEM14C
TMEM14B
AL024498.2
MAK
GCM2
SYCP2L
ELOVL2
SMIM13
ERVFRD-1
NEDD9
TMEM170B
STMND1
RBM24
CAP2
FAM8A1
NUP153
KIF13A
NHLRC1
TPMT
KDM1B
DEK
RNF144B
TULP1
FKBP5
ARMC12
CLPSL2
CLPSL1
CLPS
LHFPL5
SRPK1
SLC26A8
MAPK14
MAPK13
BRPF3
PNPLA1
BNIP5
ETV7
PXT1
KCTD20
STK38
SRSF3
CDKN1A
RAB44
CPNE5
PPIL1
C6orf89
PI16
MTCH1
FGD2
CD109
COL12A1
COL12A1
COX7A2
TMEM30A
FILIP1
GJA1
HSF2
SERINC1
PKIB
FABP7
SMPDL3A
CLVS2
TRDN
EPB41L2
AKAP7
ARG1
MED23
AHI1
PDE7B
MTFR2
BCLAF1
MAP7
CITED2
AC013470.2
SCIN
ARL4A
HDAC9
TWIST1
FERD3L
TWISTNB
TWISTNB
TMEM196
MACC1
ITGB8
ABCB5
IGFBP3
SSC4D
ZP3
DTX2
UPK3B
SPDYE16
POMZP3
CCDC146
FGL2
GSAP
PTPN12
RSBN1L
TMEM60
PHTF2
MAGI2
SEMA3A
SEMA3D
DOCK4
ZNF277
IFRD1
LSMEM1
MKLN1
PODXL
NOBOX
TPK1
NRG1
AC083977.1
FUT10
TTI2
MAK16
RNF122
DUSP26
CRISPLD1
HNF4G
ZFHX4
PEX2
MYC
GSDMC
DMRT2
SMARCA2
VLDLR
KCNV2
PUM3
RFX3
GLIS3
DMRTA1
ELAVL2
IZUMO3
TUSC1
CAAP1
PLAA
IFT74
LRRC19
TEK
EQTN
ALDH1A1
ANXA1
TLE4
TLE1
SPATA31D4
SPATA31D3
SPATA31D1
RASEF
SLC16A9
MRLN
CCDC6
ANK3
CDK1
SOX6
C11orf58
ARL14EP
MPPED2
DCDC1
ARHGAP42
PGR
ADAMTS8
ADAMTS15
SNX19
ETFBKMT
AMN1
H3F3C
RESF1
BICD1
PPHLN1
PRICKLE1
ADAMTS20
MSRB3
HMGA2
LLPH
AC078927.1
TMBIM4
MDM2
CPM
CPSF6
LYZ
KCNC2
CAPS2
GLIPR1L1
GLIPR1L2
GLIPR1
KRR1
NEDD1
FRY
ZAR1L
BRCA2
N4BP2L1
N4BP2L2
PDS5B
KL
STARD13
KLHL1
IPO5
FARP1
RNF113B
STK24
SLC15A1
DOCK9
UBAC2
GPR18
GPR183
TM9SF2
CLYBL
ZIC5
ZIC2
PCCA
GGACT
CMA1
CTSG
GZMH
GZMB
STXBP6
AKAP6
NPAS3
BMP4
CDKN3
ZFYVE26
RAD51B
ZFP36L1
GOLGA8N
ARHGAP11A
SCG5
GREM1
FMN1
RYR3
UACA
LARP6
LRRC49
THAP10
THSD4
CT62
NR2E3
MYO9A
SENP8
GRAMD2A
PKM
PARP6
CYP11A1
SEMA7A
UBL7
ARID3B
CLK3
EDC3
CYP1A1
CYP1A2
CSK
LMAN1L
CPLX3
ULK3
SCAMP2
SLCO3A1
ST8SIA2
FAM174B
ARL4D
DHX8
ETV4
MEOX1
SOST
DUSP3
CFAP97D1
MPP3
CD300LG
SOX9
MYL12A
MYL12B
TGIF1
DLGAP1
RBBP8
CABLES1
TMEM241
RIOK3
SS18
PSMA8
TAF4B
KCTD1
AQP4
CHST9
CDH2
KLHL14
CCDC178
ASXL3
NOL4
DTNA
SLX4IP
JAG1
DIPK2B
KRBOX4
