# Supplementary figures and images for: Chromatin topology defines estradiol-primed progesterone receptor and PAX2 binding in endometrial cancer cells
Source: eLife journal article supplement (doi:10.7554/elife.66034), 2022-01-12

**A**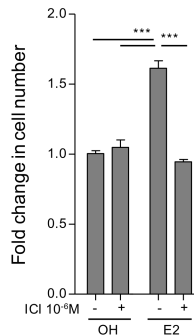**B**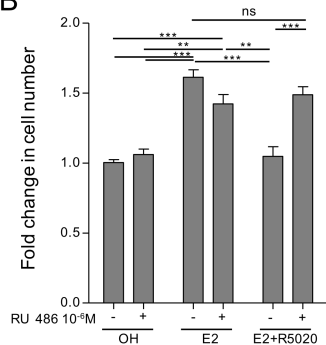**C**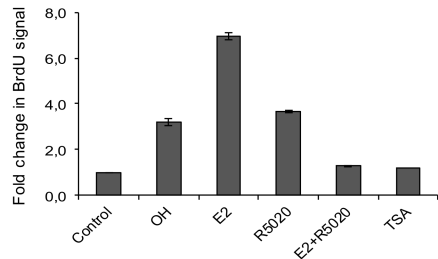**D**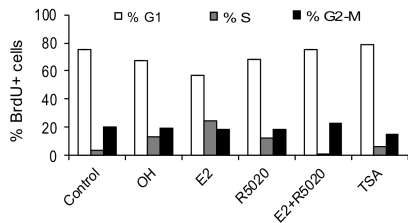**E**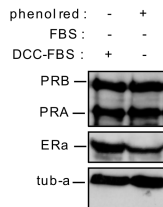**F**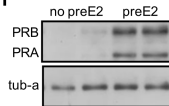**G**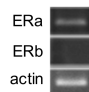**H**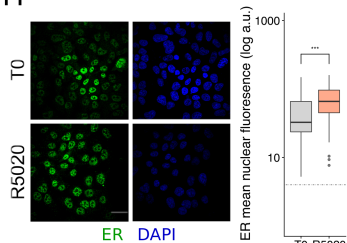

Supplement: supp [file elife-66034-supp-v1.zip]

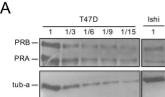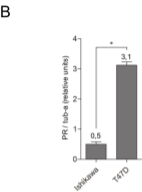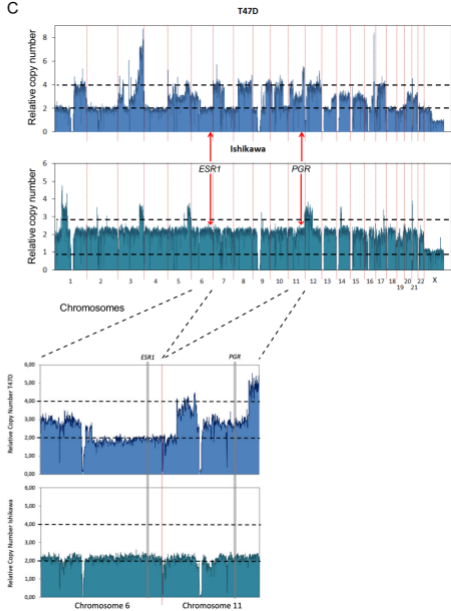

Supplement: supp [file elife-66034-supp-v1.zip]

**A**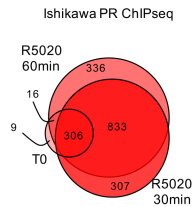**B**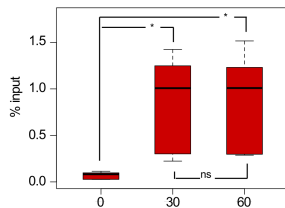**C**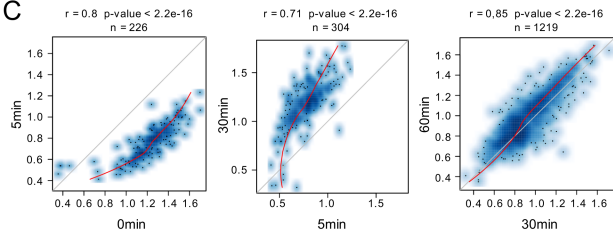**D**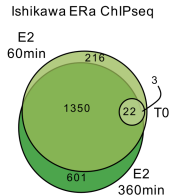**E**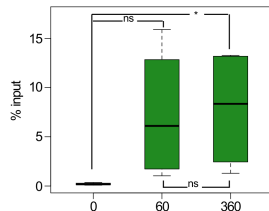**F**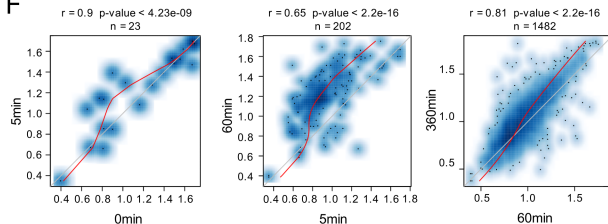**G**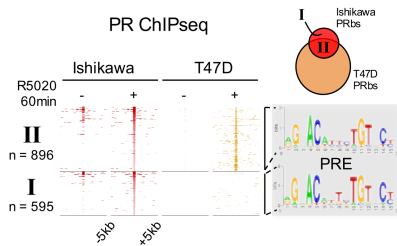**H**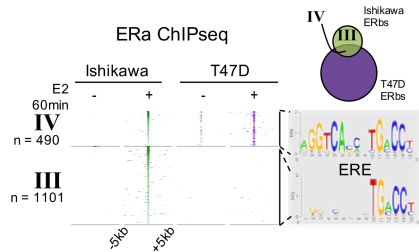

Supplement: supp [file elife-66034-supp-v1.zip]

A

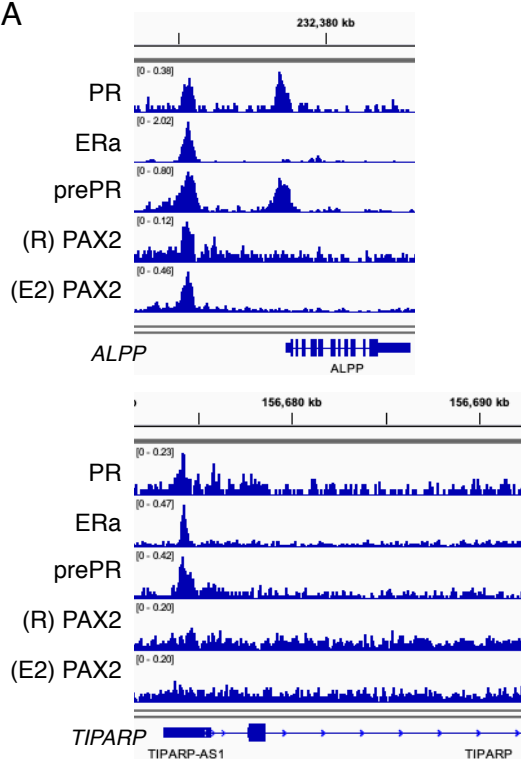

B

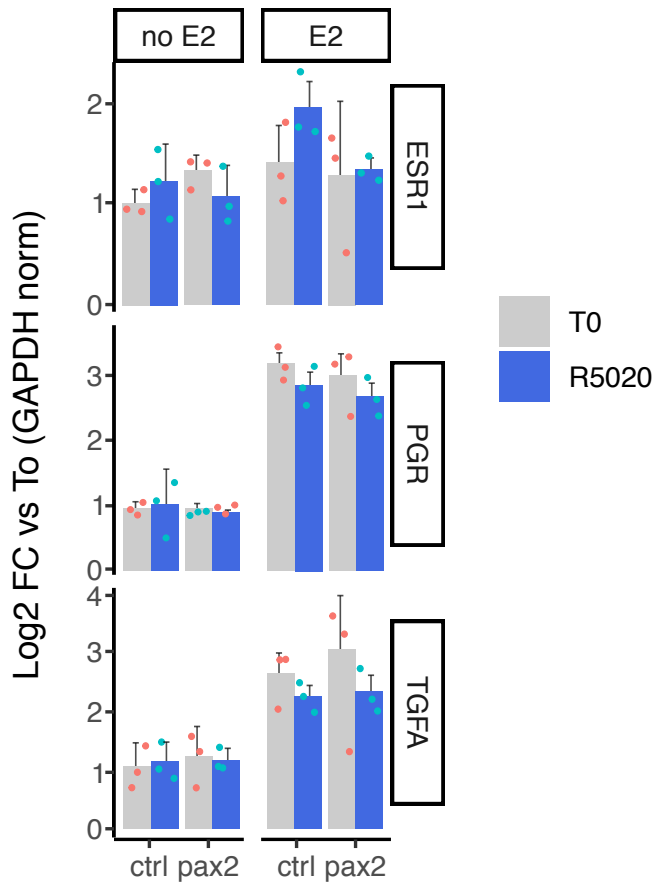

Supplement: supp [file elife-66034-supp-v1.zip]

A

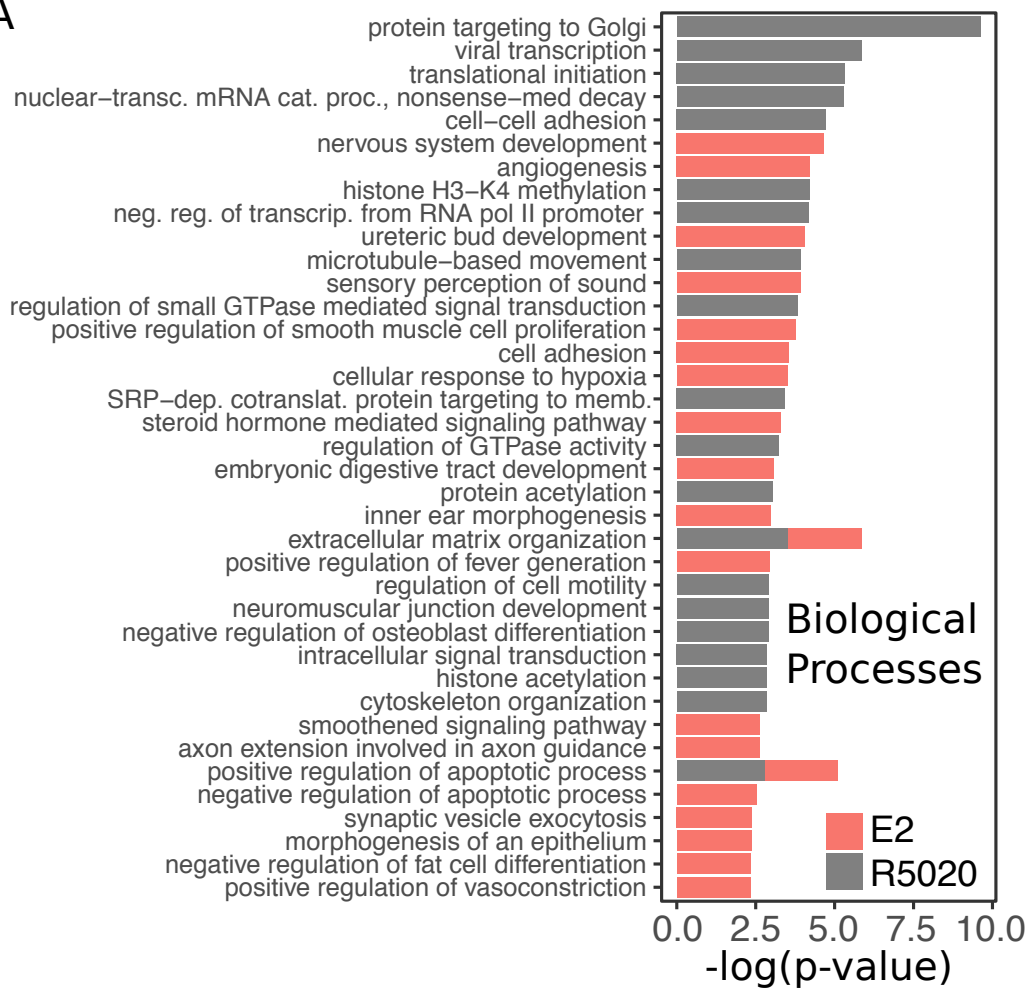

B

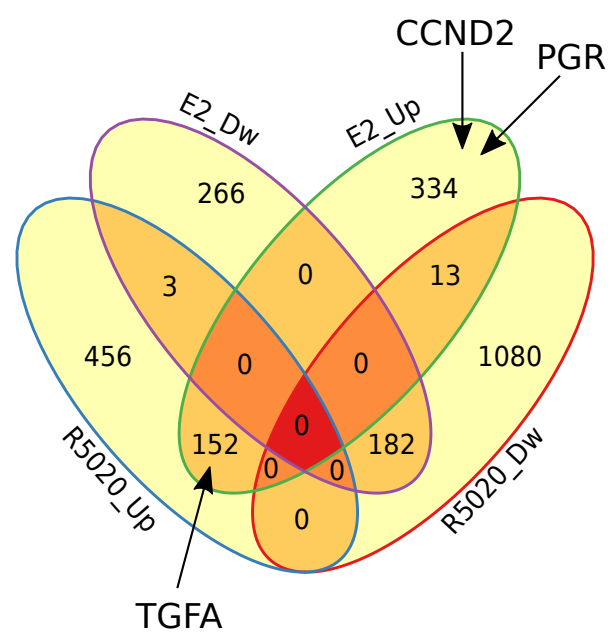

C

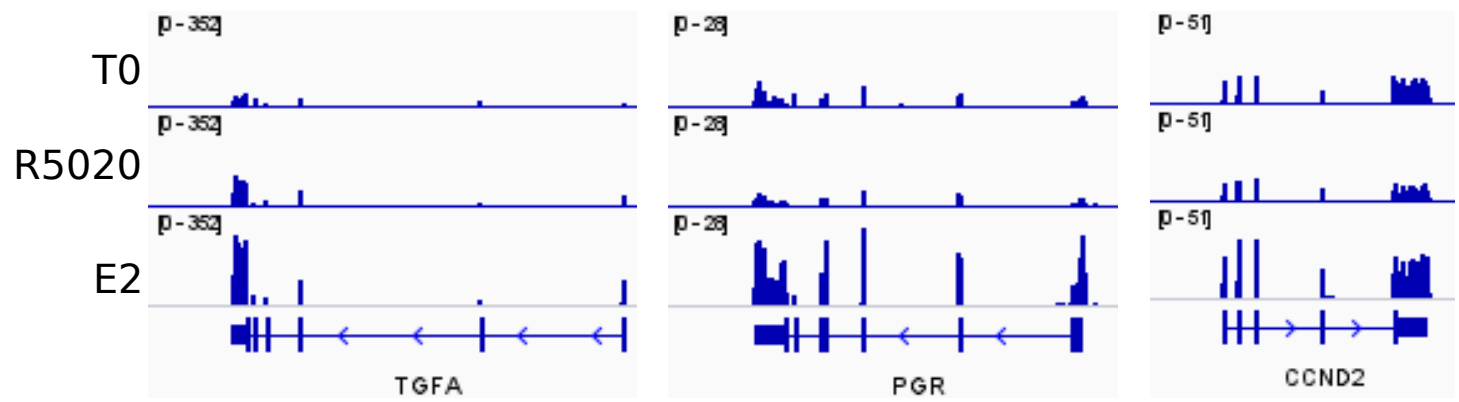

Supplement: supp [file elife-66034-supp-v1.zip › elife_poa_e66034_Figure_1_figure_supplement_2.pdf]

**A**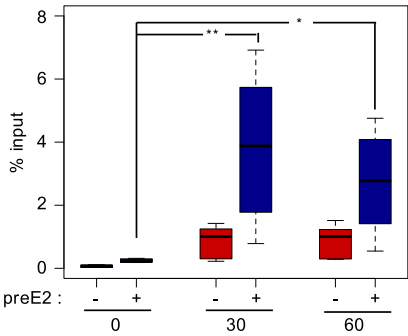**B**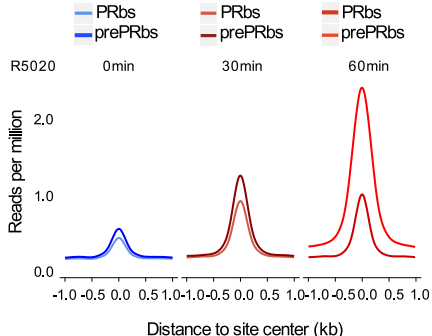**C**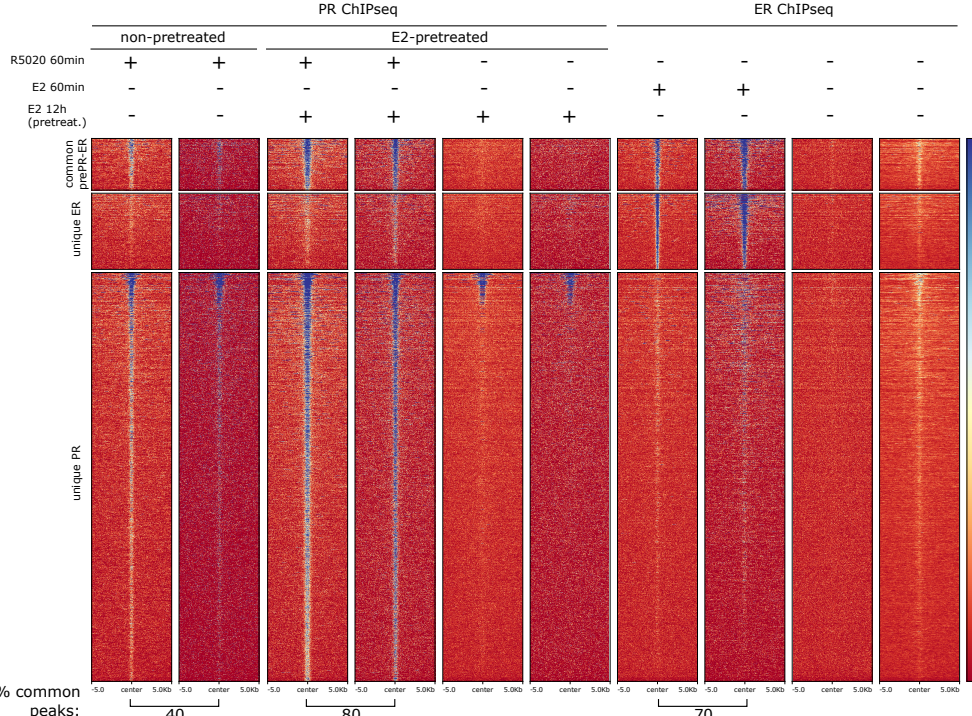**D**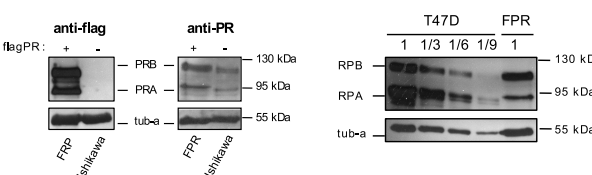**E**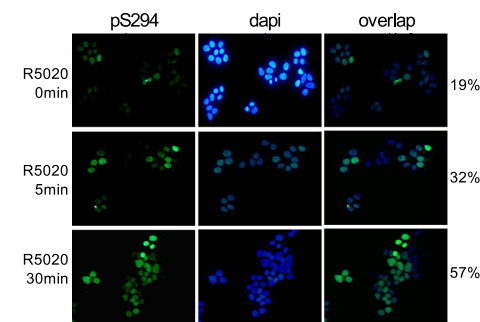**F**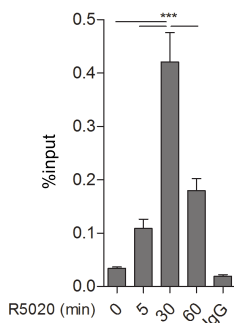**G**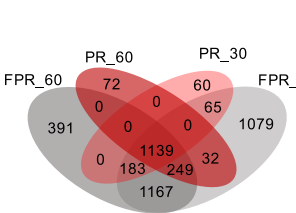**H**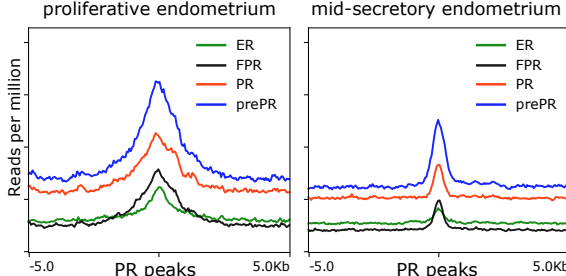

Supplement: supp [file elife-66034-supp-v1.zip › elife_poa_e66034_Figure_2_figure_supplement_2.pdf]

A

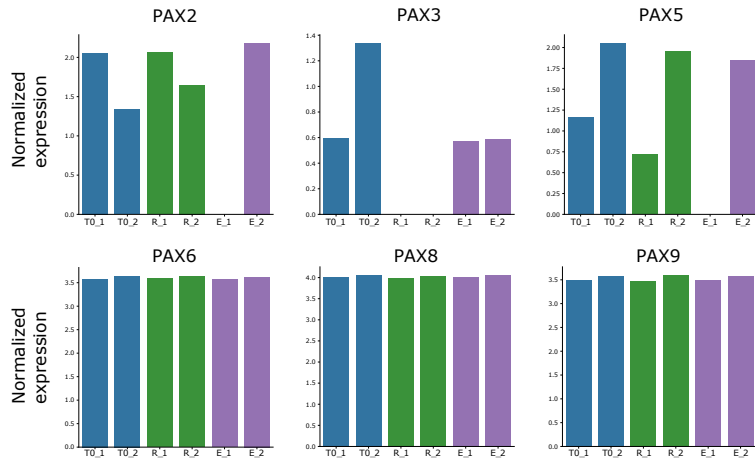

B

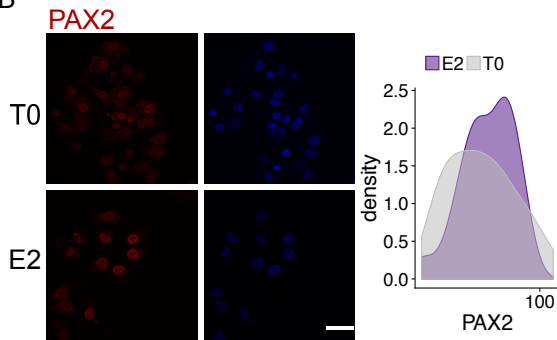

C

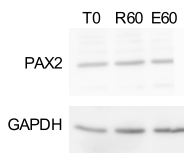

D

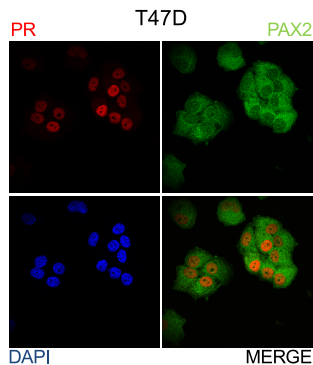

Supplement: supp [file elife-66034-supp-v1.zip › elife_poa_e66034_Figure_5_figure_supplement_1.pdf]

**A**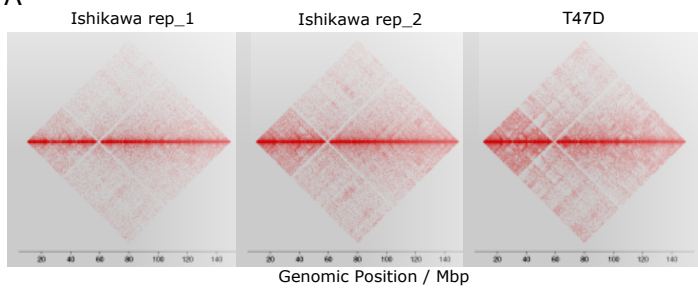**B**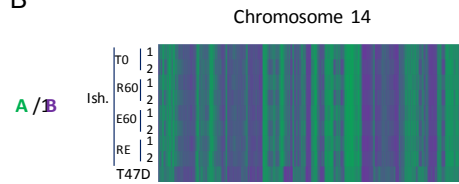**C**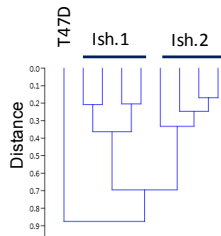**D**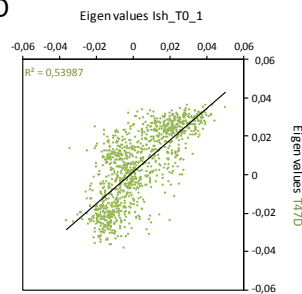**E**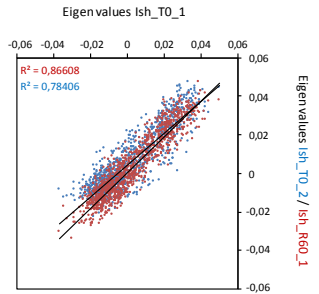**F**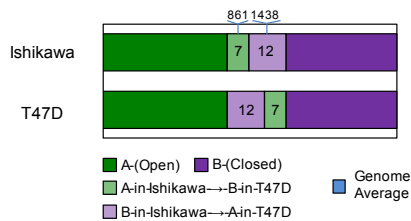**G**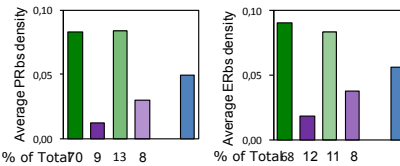**H**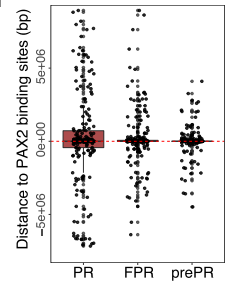**I**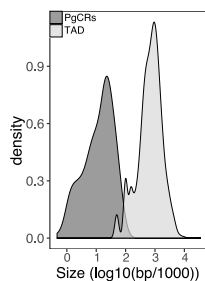**J**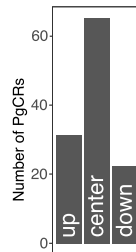**K**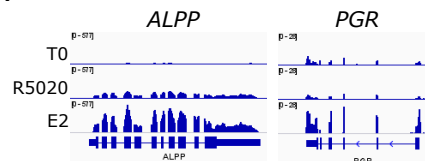

Supplement: supp [file elife-66034-supp-v1.zip › elife_poa_e66034_Figure_6_figure_supplement_1.pdf]
